# Supplementary material for: Dynamic changes of emergency visits: a retrospective observational study
Source: BMC Emerg Med. 2022 Jun 11;22:105. doi: 10.1186/s12873-022-00654-0 (PMC9187931; doi:10.1186/s12873-022-00654-0)
Supplement: Supplementary file 1 — Additional file 1. [file 12873_2022_654_MOESM1_ESM.xlsx]

## Sheet: Sheet1
Medical Record No.	Gender	Age	Date of Admission	Principal Diagnosis
17110202274	Male	0	2017110308:59:21	Neonates jaundice
17102400097	Male	0	2017102513:00:13	Bronchitis
17102401748	Male	0	2017102411:23:09	Lymph node enlargement
17102401744	Male	0	2017102411:22:22	Lumbar pain
17102401739	Male	0	2017102411:20:51	Lumbar pain
17092201573	Male	0	2017101520:12:31	Abdominal pain
17090401897	Male	0	2017090413:34:54	Breathing
17112201386	Female	0	2017112210:26:56	Trauma
17122602574	Male	1	2017122615:51:34	Pneumonia
17122000027	Male	1	2017122001:17:05	Bacterial infection
17121701991	Male	1	2017121720:55:28	Heat
17121701991	Male	1	2017121720:55:28	Heat
17121302052	Male	1	2017121312:49:25	Bronchitis
17090602310	Female	1	2017090614:49:51	Tracheitis
17072701697	Female	1	2017072711:38:42	Edema
17011403030	Female	1	2017031508:49:29	Tracheitis
17061000267	Male	2	2017061007:22:29	Bronchitis
17061000267	Male	2	2017061007:22:29	Sinus inflammation
161230134481	Male	3	2017110120:07:29	Asthma
17050400009	Female	3	2017050412:58:53	Tracheitis
161230126360	Male	4	2017121119:15:38	Hydronephrosis
17110401311	Male	4	2017110410:48:12	Abdominal pain
17053103022	Male	4	2017053121:46:16	Bacterial infection
17053103022	Male	4	2017053121:46:16	Heat
17031100353	Male	4	2017031509:48:10	Sleep disorders
17121903307	Female	4	2017121923:27:33	Bacterial infection
17121903307	Female	4	2017121923:27:33	Heat
17050501368	Male	5	2017122708:14:02	Cough
17050501368	Male	5	2017122708:14:02	Upper respiratory tract infection
17120501773	Male	5	2017120911:45:09	Heat
17112302793	Male	5	2017112318:55:48	Respiratory infections
17031402936	Male	5	2017062007:29:26	Allergies
17031402936	Male	5	2017031415:27:42	Allergies
17121901781	Male	6	2017121911:35:16	Heat
17012700130	Female	6	2017061810:08:04	Virus infection
17012700130	Female	6	2017061810:08:04	Upper respiratory tract infection
17012700130	Female	6	2017012708:08:12	Upper respiratory tract infection
17012700130	Female	6	2017012708:08:12	Virus infection
17120102032	Male	7	2017120112:36:00	Heat
17060102791	Male	7	2017112917:01:11	Pharyngeitis
17060102791	Male	7	2017070717:21:44	Pharyngeitis
17010500283	Female	7	2017121916:21:43	Upper respiratory tract infection
17112803051	Female	7	2017112822:49:49	Heat
17011101669	Female	7	2017112214:51:33	Pulmonary infection
17011101669	Female	7	2017112214:51:33	Upper respiratory tract infection
17050902870	Female	7	2017050918:13:46	Dizziness
17050200042	Female	7	2017050202:47:10	Bacterial infection
17050200042	Female	7	2017050202:47:10	Cholecystitis
17050200042	Female	7	2017050202:47:10	Abdominal pain
17120502016	Male	8	2017120512:36:52	Headache
17051101862	Male	8	2017120106:30:38	Respiratory infections
17041703149	Female	8	2017041718:01:09	Respiratory infections
17021503326	Female	8	2017030919:57:28	Upper respiratory tract infection
17101702815	Male	10	2017120308:01:21	Infectious fever
17101702815	Male	10	2017110208:43:00	Infectious fever
17101702815	Male	10	2017102302:15:45	Infectious fever
17101702815	Male	10	2017102108:31:37	Bacterial intestinal infections
17101702815	Male	10	2017102108:31:37	Pneumonia asthma
17121701058	Female	10	2017121711:04:48	Heat
17022803192	Male	11	2017022817:21:53	Upper respiratory tract infection
17073101266	Male	13	2017121816:50:13	Upper respiratory tract infection
17020101427	Male	13	2017090307:13:09	Anemia of regeneration disorder
17020101427	Male	13	2017020213:13:30	Anemia of regeneration disorder
17020101427	Male	13	2017020111:17:16	Anemia of regeneration disorder
17042500670	Female	13	2017042508:08:10	Abdominal pain
17031801049	Female	13	2017040811:07:51	Thyroiditis?
17031901516	Female	13	2017031915:47:13	Upper respiratory tract infection
17123100927	Male	14	2017123110:49:14	Respiratory infections
17122902684	Male	14	2017122921:08:11	Heat
17122501904	Male	14	2017122800:32:39	Bronchitis
17122501904	Male	14	2017122800:32:39	Respiratory infections
17122501904	Male	14	2017122700:35:05	Respiratory infections
17122501904	Male	14	2017122700:35:05	Bronchitis
17122501904	Male	14	2017122616:46:36	Bronchitis
17121700224	Male	14	2017122606:44:34	T-muscular solubility
17122503287	Male	14	2017122521:22:26	Respiratory infections
17122400674	Male	14	2017122515:45:37	Allergic rhinitis
17122400674	Male	14	2017122515:45:37	Pain
17122400674	Male	14	2017122515:45:37	Heat
17122501904	Male	14	2017122511:44:45	Respiratory infections
17122500189	Male	14	2017122506:54:10	Chest pain
17122400674	Male	14	2017122409:37:30	Heat
17122400674	Male	14	2017122409:37:30	Pain
17122300856	Male	14	2017122309:13:01	Respiratory infections
17121700224	Male	14	2017122106:33:57	T-muscular solubility
17121900669	Male	14	2017122007:14:07	Respiratory infections
17121700224	Male	14	2017122006:48:53	T-muscular solubility
17121902402	Male	14	2017121914:41:04	Upper respiratory tract infection
17121900669	Male	14	2017121908:23:26	Respiratory infections
17121900669	Male	14	2017121908:23:26	Heat
17121803359	Male	14	2017121819:31:05	Heat
17121802903	Male	14	2017121815:37:10	Infectious fever
17121700374	Male	14	2017121707:52:29	Virus infection
17121700374	Male	14	2017121707:52:29	Leukocytosis
17121700374	Male	14	2017121707:52:29	Heat
17121700224	Male	14	2017121707:23:26	T-muscular solubility
17121103378	Male	14	2017121117:42:32	Abdominal pain
17121101977	Male	14	2017121111:00:46	Upper respiratory tract infection
17121101677	Male	14	2017121110:18:14	Hypertension
17121101653	Male	14	2017121110:14:56	Upper respiratory tract infection
17120902431	Male	14	2017121015:51:14	Purulent pachylitis
17113001142	Male	14	2017121008:38:10	Chest stuffy
17121000217	Male	14	2017121008:05:36	Gastritis
17121000217	Male	14	2017121008:05:36	Heat
17120902431	Male	14	2017120915:52:37	Purulent pachylitis
17120702819	Male	14	2017120716:18:08	Upper respiratory tract infection
17120400401	Male	14	2017120614:36:11	Virus infection
17120400401	Male	14	2017120614:36:11	Heat
17120400401	Male	14	2017120413:05:15	Virus infection
17120400401	Male	14	2017120413:05:15	Heat
17112502513	Male	14	2017120209:40:22	Bacterial infection
17112502513	Male	14	2017120209:40:22	Bronchitis
17120200088	Male	14	2017120204:54:54	Respiratory infections
17120200088	Male	14	2017120204:54:54	Heat
17113001142	Male	14	2017120120:55:55	Heat
17120100423	Male	14	2017120107:37:28	Dizziness and vertigo
17112800934	Male	14	2017113008:15:46	Bacterial infection
17113000012	Male	14	2017113000:23:18	Hypertension
17113000012	Male	14	2017113000:23:18	Heat
17112800934	Male	14	2017112908:00:42	Bacterial infection
17112800934	Male	14	2017112908:00:42	Heat
17112800934	Male	14	2017112809:13:21	Heat
17112502513	Male	14	2017112520:33:10	Bronchitis
17112501341	Male	14	2017112510:28:24	Pulmonary infection
17112501341	Male	14	2017112510:28:24	Chest pain
17112201935	Male	14	2017112212:45:29	Respiratory infections
17112002488	Male	14	2017112014:45:13	Abdominal pain
17111400046	Male	14	2017111404:26:05	Abdominal pain
17111002709	Male	14	2017111021:21:04	Bacterial infection
17111002709	Male	14	2017111021:21:04	Upper respiratory tract infection
17111002709	Male	14	2017111021:21:04	Throat inflammation
17110302258	Male	14	2017110315:34:39	Respiratory infections
17110302258	Male	14	2017110315:34:39	Chest pain
17101302759	Male	14	2017101610:26:55	Bacterial infection
17101302759	Male	14	2017101610:26:55	Bronchitis
17101302759	Male	14	2017101508:47:26	Bacterial infection
17101302759	Male	14	2017101508:47:26	Bronchitis
17101302759	Male	14	2017101410:13:34	Bacterial infection
17101302759	Male	14	2017101410:13:34	Bronchitis
17101302759	Male	14	2017101321:56:18	Bacterial infection
17101302759	Male	14	2017101321:56:18	Bronchitis
17101302759	Male	14	2017101321:56:18	Cough
17100600065	Male	14	2017101006:25:03	Purulent pachylitis
17100901511	Male	14	2017100911:50:53	Infectious monocytosis
17100901511	Male	14	2017100911:50:53	Purulent pachylitis
17100600065	Male	14	2017100906:29:44	Purulent pachylitis
17100600065	Male	14	2017100805:39:23	Purulent pachylitis
17100600065	Male	14	2017100705:49:38	Purulent pachylitis
17100600065	Male	14	2017100605:59:00	Mickory inflammation
17100600035	Male	14	2017100602:33:00	Intestinal infection
17093001862	Male	14	2017093016:55:25	Upper respiratory tract infection
17092801689	Male	14	2017092812:52:10	Abdominal pain
17092702368	Male	14	2017092716:32:43	Excessive ventilation syndrome
17092102920	Male	14	2017092617:03:39	Infectious fever
17090901931	Male	14	2017092606:58:25	Bronchitis
17090901931	Male	14	2017092606:58:25	Upper respiratory tract infection
17092502979	Male	14	2017092519:41:41	Abdominal pain
17092102920	Male	14	2017092515:06:50	Infectious fever
17092401246	Male	14	2017092412:14:10	Electrolyte disturbance
17092401246	Male	14	2017092412:14:10	Abdominal pain
17010205741	Male	14	2017092411:52:32	Be palpitations
17092102920	Male	14	2017092406:41:25	Infectious fever
17092102920	Male	14	2017092311:41:06	Infectious fever
17092102920	Male	14	2017092216:12:56	Infectious fever
17092102979	Male	14	2017092121:29:55	Purulent pachylitis
17092102920	Male	14	2017092120:30:02	Infectious fever
17092102920	Male	14	2017092120:30:02	Headache
17092102920	Male	14	2017092120:30:02	Heat
17061101381	Male	14	2017090510:23:13	Pancreatitis
17090403159	Male	14	2017090421:16:47	Bacterial infection
17090403159	Male	14	2017090421:16:47	Cough
17090400138	Male	14	2017090406:50:59	Bacterial infection
17090400138	Male	14	2017090406:50:59	Virus infection
17090400138	Male	14	2017090406:50:59	Intestinal infection
17090301427	Male	14	2017090316:08:45	Respiratory infections
17090100040	Male	14	2017090104:29:28	Heat
17082901072	Male	14	2017083010:16:31	Abdominal pain
17082901072	Male	14	2017083010:16:31	Diarrhea
17082602204	Male	14	2017082618:03:19	Hyperthyroidism
17082602204	Male	14	2017082618:03:19	Hypokalemia
17081502264	Male	14	2017082412:10:29	Thrombocytopenia
17081502264	Male	14	2017082412:10:29	Gastritis
17081502264	Male	14	2017082412:10:29	Liver damage
17081502264	Male	14	2017082311:18:11	Systemic inflammatory response syndrome
17081502264	Male	14	2017082311:18:11	Liver damage
17082300845	Male	14	2017082308:59:59	Air
17082300845	Male	14	2017082308:59:59	Abdominal pain
17081502264	Male	14	2017082210:39:04	Infectious fever
17081502264	Male	14	2017082210:39:04	Gastritis
17081502264	Male	14	2017082210:39:04	Liver damage
17081502264	Male	14	2017082210:39:04	Systemic inflammatory response syndrome
17081502264	Male	14	2017082210:39:04	Thrombocytopenia
17082201445	Male	14	2017082210:31:17	Respiratory infections
17082103239	Male	14	2017082122:41:09	Intestinal infection
17082103239	Male	14	2017082122:41:09	Bacterial infection
17082103239	Male	14	2017082122:41:09	Abdominal pain
17081801327	Male	14	2017081810:13:52	Respiratory infections
17061302468	Male	14	2017081808:24:13	Myocarditis
17081502264	Male	14	2017081611:27:24	Infectious fever
17081502264	Male	14	2017081611:27:24	Thrombocytopenia
17081502264	Male	14	2017081516:31:04	Thrombocytopenia
17081403012	Male	14	2017081418:12:02	Chest pain
17081401396	Male	14	2017081410:10:55	Thin
17080102719	Male	14	2017080122:18:23	Heat
17080102719	Male	14	2017080122:18:23	Diarrhea
17080102719	Male	14	2017080122:18:23	Abdominal pain
17080102719	Male	14	2017080122:18:23	Bacterial infection
17072802400	Male	14	2017072819:05:46	Upper respiratory tract infection
17072802400	Male	14	2017072819:05:46	Heat
161230045003	Male	14	2017072609:41:37	Intestinal infection
161230045003	Male	14	2017072512:55:59	Bacterial infection
161230045003	Male	14	2017072512:55:59	Intestinal infection
161230045003	Male	14	2017072502:33:47	Diarrhea
17072102146	Male	14	2017072116:55:38	Gastritis
17072000311	Male	14	2017072007:23:49	Itchy rash
17071700028	Male	14	2017071702:15:12	Heat
17071100019	Male	14	2017071100:49:06	Abdominal pain
17070602404	Male	14	2017070621:32:59	Abdominal pain
17070502623	Male	14	2017070520:17:52	Vomiting
17070402595	Male	14	2017070423:26:20	Virus infection
17070402595	Male	14	2017070423:26:20	Heat
17062800045	Male	14	2017062804:26:08	Abdominal pain
17062401745	Male	14	2017062414:49:07	Respiratory infections
17062102649	Male	14	2017062123:10:37	Bacterial infection
17062102649	Male	14	2017062123:10:37	Vomiting
17062102649	Male	14	2017062123:10:37	Abdominal pain
17062102231	Male	14	2017062117:13:17	Respiratory infections
17061900008	Male	14	2017061900:32:05	Allergic asthma
17061900008	Male	14	2017061900:32:05	Asthma
17061302744	Male	14	2017061321:04:37	Respiratory infections
17061101669	Male	14	2017061120:58:33	Bacterial infection
17061101669	Male	14	2017061120:58:33	Diarrhea
17060602371	Male	14	2017060616:12:21	Bronchitis
17060602371	Male	14	2017060616:12:21	Cough
17060200060	Male	14	2017060218:29:26	Respiratory infections
17060102013	Male	14	2017060113:13:35	Chest stuffy
17052401881	Male	14	2017052411:43:06	Hypertension
17051702868	Male	14	2017051718:05:14	Respiratory infections
17051701361	Male	14	2017051709:47:58	Purulent pachylitis
17051602455	Male	14	2017051615:03:56	Abdominal pain
17050901431	Male	14	2017050910:05:44	Respiratory infections
17050901431	Male	14	2017050910:05:44	Vomiting
17050901431	Male	14	2017050910:05:44	Heat
17050701828	Male	14	2017050721:16:44	Diabetes
17050502764	Male	14	2017050522:09:12	Respiratory infections
17050302263	Male	14	2017050313:27:59	Vomiting
17050200136	Male	14	2017050206:55:40	Abdominal pain
17042202205	Male	14	2017042521:48:35	Acute bronchitis
17042202205	Male	14	2017042419:42:27	Acute bronchitis
17042202205	Male	14	2017042317:31:35	Acute bronchitis
17042200255	Male	14	2017042207:10:30	Hyperthyroidism
17042102770	Male	14	2017042119:28:29	Cough
17041800956	Male	14	2017041808:55:02	Cough
17041600018	Male	14	2017041600:49:48	Respiratory infections
17041300577	Male	14	2017041307:58:11	Respiratory infections
17040701330	Male	14	2017040709:35:42	Asthma
17040602960	Male	14	2017040616:03:08	Dermatitis
17032900001	Male	14	2017032902:20:46	Bacterial infection
17032900001	Male	14	2017032902:20:46	Heat
17032900001	Male	14	2017032902:20:46	Vomiting
17032600839	Male	14	2017032610:06:46	Chest pain
17031802811	Male	14	2017031821:53:51	Bacterial infection
17031802811	Male	14	2017031821:53:51	Abdominal pain
17010206931	Male	14	2017031715:14:29	Headache
17031603133	Male	14	2017031619:03:11	Abdominal pain
17031003308	Male	14	2017031021:42:35	Upper respiratory tract infection
17030902921	Male	14	2017030915:36:39	Hypersodium hyperemia
17030902921	Male	14	2017030915:36:39	Electrolyte disturbance
17030902921	Male	14	2017030915:36:39	Abdominal pain
17030701445	Male	14	2017030709:45:40	Abdominal pain
17030103277	Male	14	2017030121:02:32	Abdominal pain
17030103199	Male	14	2017030119:46:46	Chest pain
17022703390	Male	14	2017022717:49:50	Bacterial infection
17022703390	Male	14	2017022717:49:50	Acute gastric mucosal disease
17022703390	Male	14	2017022717:49:50	Nausea and vomiting
17022700036	Male	14	2017022702:41:42	Bacterial infection
17020200849	Male	14	2017020209:03:29	Edema
17013001832	Male	14	2017013020:57:45	Bacterial infection
17013001832	Male	14	2017013020:57:45	Abdominal pain
17012800055	Male	14	2017012804:54:59	Gastritis
17012800055	Male	14	2017012804:54:59	Vomiting
17012502557	Male	14	2017012520:35:26	Air
17012502104	Male	14	2017012514:53:52	Bacterial infection
17012502104	Male	14	2017012514:53:52	Heat
17012502104	Male	14	2017012514:53:52	Diarrhea
17011502008	Male	14	2017011521:09:02	Respiratory infections
17011204093	Male	14	2017011220:22:34	Respiratory infections
17011102414	Male	14	2017011111:25:13	Bacterial infection
17011102414	Male	14	2017011111:25:13	Chest pain
17010604244	Male	14	2017010617:44:53	Acute gastritis
17010604244	Male	14	2017010617:44:53	Poisoning
17010503616	Male	14	2017010514:30:15	Respiratory infections
17010280072	Male	14	2017010310:52:17	Infectious fever
17010280072	Male	14	2017010300:22:53	Infectious fever
17010280072	Male	14	2017010223:03:55	Upper respiratory tract infection
17010203834	Male	14	2017010205:04:14	Respiratory infections
17010203834	Male	14	2017010205:04:14	Heat
17010135852	Male	14	2017010118:02:28	Respiratory infections
17122802683	Female	14	2017122818:32:08	Bacterial infection
17122802683	Female	14	2017122818:32:08	Infectious fever
17122401747	Female	14	2017122418:57:42	Bronchitis
17122401747	Female	14	2017122418:57:42	Cough
17122400042	Female	14	2017122402:07:41	Respiratory infections
17122102926	Female	14	2017122119:35:59	Upper respiratory tract infection
17091902827	Female	14	2017122019:00:43	Upper respiratory tract infection
17122002783	Female	14	2017122016:57:32	Upper respiratory tract infection
17121903157	Female	14	2017121920:53:01	Respiratory infections
17121803294	Female	14	2017121818:43:20	Bacterial infection
17121803294	Female	14	2017121818:43:20	Heat
17121700125	Female	14	2017121706:25:10	Upper respiratory tract infection
17121602651	Female	14	2017121622:38:15	Bacterial infection
17121602651	Female	14	2017121622:38:15	Infectious fever
17092200316	Female	14	2017121601:45:23	Abdominal pain
17121402987	Female	14	2017121418:24:15	Upper respiratory tract infection
17121402987	Female	14	2017121418:24:15	Cough
17121402987	Female	14	2017121418:24:15	Heat
17010212236	Female	14	2017121318:18:01	Upper respiratory tract infection
17010212236	Female	14	2017121318:18:01	Heat
17010212236	Female	14	2017121300:12:10	Upper respiratory tract infection
17010212236	Female	14	2017121300:12:10	Heat
17121203380	Female	14	2017121223:16:17	Upper respiratory tract infection
17121203380	Female	14	2017121223:16:17	Heat
17121002279	Female	14	2017121022:51:04	Bacterial infection
17121002279	Female	14	2017121022:51:04	Diarrhea
17121002279	Female	14	2017121022:51:04	Abdominal pain
17120902249	Female	14	2017120914:44:27	Heat
17120403204	Female	14	2017120908:40:32	Infectious fever
17120403204	Female	14	2017120816:16:14	Infectious fever
17112800358	Female	14	2017120713:22:06	Leukocytosis
17112800358	Female	14	2017120713:22:06	Respiratory infections
161230032711	Female	14	2017120520:54:41	Upper respiratory tract infection
17112800358	Female	14	2017120515:29:32	Leukocytosis
17112800358	Female	14	2017120515:29:32	Respiratory infections
17120403204	Female	14	2017120512:28:56	Infectious fever
17120403204	Female	14	2017120416:34:56	Infectious fever
17112601071	Female	14	2017120214:59:25	Pneumonia
17112601071	Female	14	2017120114:48:18	Pneumonia
17120101264	Female	14	2017120109:46:27	Chest pain
17112601071	Female	14	2017113014:45:34	Pneumonia
17112601071	Female	14	2017112914:39:12	Pneumonia
17112802790	Female	14	2017112818:10:05	Abdominal pain
17112601071	Female	14	2017112814:51:39	Pneumonia
17112800358	Female	14	2017112807:44:52	Abdominal pain
17112601071	Female	14	2017112713:55:21	Tracheitis
17112601071	Female	14	2017112713:55:21	Pneumonia
161230137908	Female	14	2017112712:50:20	Bronchitis
161230137908	Female	14	2017112712:50:20	Respiratory infections
17112601539	Female	14	2017112615:24:05	Respiratory infections
17112601071	Female	14	2017112611:04:15	Pneumonia
161230137908	Female	14	2017112608:54:45	Bronchitis
161230137908	Female	14	2017112608:54:45	Respiratory infections
161230137908	Female	14	2017112509:35:38	Respiratory infections
17111900859	Female	14	2017112508:54:05	Bacterial infection
17111900859	Female	14	2017112508:54:05	Pneumonia
17111900859	Female	14	2017112408:53:24	Bacterial infection
17111900859	Female	14	2017112408:53:24	Pneumonia
161230020044	Female	14	2017112316:11:13	Chest pain
17111900859	Female	14	2017112308:58:40	Pneumonia
17112203045	Female	14	2017112221:03:53	Bacterial infection
17112203045	Female	14	2017112221:03:53	Respiratory infections
17111900859	Female	14	2017112208:57:27	Pneumonia
17111900859	Female	14	2017112109:17:20	Leukocytosis
17111900859	Female	14	2017112109:17:20	Pneumonia
17111900859	Female	14	2017112009:26:12	Bacterial infection
17111900859	Female	14	2017112009:26:12	Pneumonia
17111901293	Female	14	2017111914:09:04	Bronchitis
17111901293	Female	14	2017111914:09:04	Heat
17111900859	Female	14	2017111910:22:33	Pneumonia
17111801185	Female	14	2017111810:39:51	Pulmonary infection
17111801185	Female	14	2017111810:39:51	Congenital heart disease
17111801185	Female	14	2017111810:39:51	Respiratory infections
17111502785	Female	14	2017111519:29:31	Heat
17111002622	Female	14	2017111417:47:06	Mickory inflammation
17111002622	Female	14	2017111317:46:32	Bacterial infection
17111002622	Female	14	2017111317:46:32	Mickory inflammation
17111002622	Female	14	2017111218:05:45	Bacterial infection
17111002622	Female	14	2017111218:05:45	Mickory inflammation
17111002622	Female	14	2017111218:05:45	Heat
17111002622	Female	14	2017111218:05:45	Purulent pachylitis
17111002622	Female	14	2017111118:02:09	Bacterial infection
17111002622	Female	14	2017111118:02:09	Purulent pachylitis
17111002622	Female	14	2017111020:10:24	Mickory inflammation
17111002622	Female	14	2017111020:10:24	Heat
17031502396	Female	14	2017111018:34:00	Respiratory infections
17110902929	Female	14	2017110919:47:32	Chest pain
17110803204	Female	14	2017110822:49:31	Diarrhea
17110302616	Female	14	2017110319:40:22	Bronchitis
17110302616	Female	14	2017110319:40:22	Cough
17102502745	Female	14	2017110315:13:56	Bacterial infection
17102502745	Female	14	2017110315:13:56	Allergic purpura
17102502745	Female	14	2017110315:13:56	Duodenal ulcer
17102502745	Female	14	2017110315:13:56	Abdominal pain
17110201993	Female	14	2017110212:57:31	Chest pain
17102801980	Female	14	2017102911:19:25	Bacterial infection
17102801980	Female	14	2017102911:19:25	Heat
17102801980	Female	14	2017102814:58:56	Bacterial infection
17102801980	Female	14	2017102814:58:56	Heat
17102801652	Female	14	2017102812:57:11	Medical examination
17102801052	Female	14	2017102809:58:08	Thrombocytopenia
17081502816	Female	14	2017102612:34:20	Upper respiratory tract infection
17102502745	Female	14	2017102518:59:59	Gastritis
17102502745	Female	14	2017102518:59:59	Abdominal pain
17101202964	Female	14	2017101219:14:09	Upper respiratory tract infection
17092502959	Female	14	2017092519:27:19	Infectious fever
17092502889	Female	14	2017092518:17:19	Chest pain
17092302518	Female	14	2017092409:48:08	Respiratory infections
17092302518	Female	14	2017092319:01:59	Respiratory infections
17092002782	Female	14	2017092019:30:31	Respiratory infections
17092002448	Female	14	2017092015:42:54	Bacterial infection
17092002448	Female	14	2017092015:42:54	Abdominal pain
17092002331	Female	14	2017092015:34:26	Respiratory infections
17031100597	Female	14	2017091922:34:48	Chest pain
17091902719	Female	14	2017091916:21:59	Respiratory infections
17091902719	Female	14	2017091916:21:59	Heat
17091902657	Female	14	2017091915:58:05	Upper respiratory tract infection
17091902657	Female	14	2017091915:58:05	Heat
17091701913	Female	14	2017091723:41:33	Allergic dermatitis
17091701848	Female	14	2017091721:49:06	Abdominal pain
17091402024	Female	14	2017091413:48:09	Air
17090101700	Female	14	2017090112:04:26	Chest pain
17090100011	Female	14	2017090100:34:25	Chest pain
17082302797	Female	14	2017082322:09:48	Abdominal pain
17081402808	Female	14	2017081415:55:53	Vomiting
17081402808	Female	14	2017081415:55:53	Headache
17081102690	Female	14	2017081122:56:44	Heat
17080502193	Female	14	2017080521:37:44	Dizziness and vertigo
17080302601	Female	14	2017080319:02:13	Respiratory infections
17072600545	Female	14	2017072607:57:06	Purpura wind
17042002047	Female	14	2017071807:06:02	Chronic renal insufficiency (uremia)
17071400042	Female	14	2017071403:42:27	Intestinal infection
17071400042	Female	14	2017071403:42:27	Abdominal pain
17071302546	Female	14	2017071323:27:24	Dizziness
17071201340	Female	14	2017071211:00:41	Hypothyroidism
17071201340	Female	14	2017071211:00:41	Lymph node enlargement
17070702278	Female	14	2017070908:18:19	Respiratory infections
17070702278	Female	14	2017070809:42:27	Bacterial infection
17070702278	Female	14	2017070809:42:27	Respiratory infections
17070702278	Female	14	2017070718:11:04	Bacterial infection
17070702278	Female	14	2017070718:11:04	Respiratory infections
17070502748	Female	14	2017070523:01:21	Infectious monocytosis
17070502748	Female	14	2017070523:01:21	Purulent pachylitis
17062902456	Female	14	2017070218:19:28	Bacterial infection
17062902456	Female	14	2017070218:19:28	Heat
17062902492	Female	14	2017062920:09:45	Tracheitis
17062902492	Female	14	2017062920:09:45	Cough
17062902456	Female	14	2017062919:26:14	Intestinal infection
17062902456	Female	14	2017062919:26:14	Vomiting
17062802517	Female	14	2017062818:39:38	Foreign objects in the esophagus
17062600253	Female	14	2017062607:11:00	To be checked
17061600074	Female	14	2017061606:22:13	Diarrhea
17061600074	Female	14	2017061606:22:13	Abdominal pain
17061402248	Female	14	2017061415:08:03	Gastritis
17061402248	Female	14	2017061415:08:03	Abdominal pain
17061300051	Female	14	2017061304:05:52	Abdominal pain
17060802961	Female	14	2017060823:46:46	Cough
17060802725	Female	14	2017060818:43:23	Respiratory infections
17060800064	Female	14	2017060805:35:56	Bacterial infection
17060800064	Female	14	2017060805:35:56	Abdominal pain
17052801216	Female	14	2017060312:54:59	Bacterial infection
17052801216	Female	14	2017052908:52:32	Bacterial infection
17052801216	Female	14	2017052908:52:32	Abdominal pain
17052801216	Female	14	2017052813:52:48	Bacterial infection
17052801216	Female	14	2017052813:52:48	Abdominal pain
17052402084	Female	14	2017052413:34:11	Diarrhea
17052402084	Female	14	2017052413:34:11	Abdominal pain
17052301890	Female	14	2017052313:15:57	Gastritis
17052101697	Female	14	2017052121:34:28	Abdominal pain
17052100204	Female	14	2017052107:32:14	Virus infection
17052100204	Female	14	2017052107:32:14	Lymph node enlargement
17051900003	Female	14	2017051900:12:10	Gastritis
17051900003	Female	14	2017051900:12:10	Stomach pain
17051802091	Female	14	2017051813:42:14	Abdominal pain
17011803624	Female	14	2017051611:06:54	Bronchitis
17051001907	Female	14	2017051011:23:04	Heat
17050402579	Female	14	2017050415:06:15	Cough
17050100703	Female	14	2017050109:34:41	Lymph node enlargement
17042701951	Female	14	2017042713:08:56	Abdominal pain
17041802541	Female	14	2017041815:15:06	Bronchitis
17041200011	Female	14	2017041200:30:15	Respiratory infections
17040503303	Female	14	2017040520:23:03	Lymph node inflammation?
17040302456	Female	14	2017040315:12:01	Hyperthyroidism
17032601180	Female	14	2017032612:34:29	Cough
17032003311	Female	14	2017032017:06:58	Respiratory infections
17031003357	Female	14	2017031118:47:34	Vomiting
17031003357	Female	14	2017031118:47:34	Bacterial infection
17031100597	Female	14	2017031107:54:14	Flu?
17031003357	Female	14	2017031022:55:23	Dizziness
17030902465	Female	14	2017030913:45:42	Abdominal pain
17030303237	Female	14	2017030320:43:18	Chest stuffy
17022003396	Female	14	2017022017:10:02	Diarrhea
17021402431	Female	14	2017021414:35:14	Abdominal pain
17013000910	Female	14	2017013010:43:49	Bronchitis
17012800182	Female	14	2017012809:38:58	Pneumonia
17012800182	Female	14	2017012809:38:58	Bronchial infection
17012400046	Female	14	2017012404:36:29	Bacterial infection
17012400046	Female	14	2017012404:36:29	Abdominal pain
17011501097	Female	14	2017011510:17:51	Respiratory infections
17011003952	Female	14	2017011018:26:32	Respiratory infections
17010504630	Female	14	2017010522:38:32	Abdominal pain
17010504630	Female	14	2017010522:38:32	Allergic purpura
17123101559	Male	15	2017123117:43:37	Respiratory infections
17123002214	Male	15	2017123114:19:26	Pulmonary infection
17122600489	Male	15	2017123113:47:30	Respiratory infections
161230042526	Male	15	2017123111:54:54	Respiratory infections
161230042526	Male	15	2017123111:54:54	Chronic gastritis
17122902589	Male	15	2017123111:44:46	Bacterial infection
17123100936	Male	15	2017123110:51:37	Upper respiratory tract infection
17123100936	Male	15	2017123110:51:37	Heat
17122900153	Male	15	2017123106:30:14	Respiratory infections
17123002309	Male	15	2017123018:29:47	Upper respiratory tract infection
17123002309	Male	15	2017123018:29:47	Heat
17123002214	Male	15	2017123017:10:19	Pulmonary infection
17122902589	Male	15	2017123013:49:41	Bacterial infection
17122902589	Male	15	2017123013:49:41	Abdominal pain
17122600489	Male	15	2017123010:10:40	Respiratory infections
161230042526	Male	15	2017123008:11:32	Chronic gastritis
161230042526	Male	15	2017123008:11:32	Respiratory infections
17122900153	Male	15	2017123007:12:44	Respiratory infections
17122902589	Male	15	2017122919:57:10	Stomach retention
17122902589	Male	15	2017122919:57:10	Respiratory infections
17122802027	Male	15	2017122909:51:38	Heat
17122802027	Male	15	2017122909:51:38	Respiratory infections
17122901037	Male	15	2017122909:47:42	Respiratory infections
17122900153	Male	15	2017122906:54:29	Respiratory infections
17122600489	Male	15	2017122905:18:18	Respiratory infections
17122802753	Male	15	2017122819:22:19	Respiratory infections
17122802450	Male	15	2017122815:52:57	Respiratory infections
17122802027	Male	15	2017122813:48:21	Heat
17122802027	Male	15	2017122813:48:21	Respiratory infections
17122800505	Male	15	2017122807:57:42	Upper respiratory tract infection
17122701739	Male	15	2017122711:47:00	Mickory inflammation
17122701739	Male	15	2017122711:47:00	Heat
17122700830	Male	15	2017122708:49:07	Abdominal pain
17122700830	Male	15	2017122708:49:07	Vomiting
17122600489	Male	15	2017122607:53:53	Respiratory infections
17110801157	Male	15	2017122607:16:27	Respiratory infections
17122401406	Male	15	2017122414:55:37	Respiratory infections
17122401406	Male	15	2017122414:55:37	Cough
17122201191	Male	15	2017122408:39:57	Respiratory infections
17122400110	Male	15	2017122406:32:45	Bacterial infection
17122400110	Male	15	2017122406:32:45	Abdominal pain
17122201191	Male	15	2017122308:46:25	Respiratory infections
17122201191	Male	15	2017122209:42:07	Respiratory infections
17122200085	Male	15	2017122204:43:34	Heat
161231100555	Male	15	2017122201:19:30	Abdominal pain
17122102417	Male	15	2017122114:57:49	Bacterial infection
17122102417	Male	15	2017122114:57:49	Infectious fever
17122100953	Male	15	2017122109:10:21	Infectious fever
17122003235	Male	15	2017122023:56:49	Abdominal pain
17122003161	Male	15	2017122022:20:48	Bacterial infection
17122003161	Male	15	2017122022:20:48	Bronchitis
17122003161	Male	15	2017122022:20:48	Cough
17122003138	Male	15	2017122021:52:54	Respiratory infections
17122003110	Male	15	2017122021:31:26	Heat
17122003095	Male	15	2017122021:20:26	Bacterial infection
17122003095	Male	15	2017122021:20:26	Abdominal pain
17122003042	Male	15	2017122020:23:50	Upper respiratory tract infection
17122003000	Male	15	2017122019:51:07	Upper respiratory tract infection
17091001933	Male	15	2017121909:07:50	Respiratory infections
17121900873	Male	15	2017121909:00:38	Upper respiratory tract infection
17091001933	Male	15	2017121811:19:43	Bronchitis
17091001933	Male	15	2017121811:19:43	Respiratory infections
17121701865	Male	15	2017121719:09:10	Heat
17091001933	Male	15	2017121713:34:14	Bronchitis
17091001933	Male	15	2017121713:34:14	Respiratory infections
17121700991	Male	15	2017121710:45:38	Respiratory infections
17121700953	Male	15	2017121710:34:24	Respiratory infections
17121600116	Male	15	2017121706:20:48	Bronchitis
17121602082	Male	15	2017121615:13:12	Hyperuricaemia
17091001933	Male	15	2017121613:36:17	Respiratory infections
17121601155	Male	15	2017121610:11:27	Virus infection
17121600116	Male	15	2017121606:23:55	Virus infection
17121600116	Male	15	2017121606:23:55	Bronchitis
17121600116	Male	15	2017121606:23:55	Heat
17121502735	Male	15	2017121517:21:41	Infectious fever
17121502626	Male	15	2017121516:22:06	Infectious fever
17091001933	Male	15	2017121514:38:29	Bronchitis
17091001933	Male	15	2017121514:38:29	Respiratory infections
17121301826	Male	15	2017121514:30:49	Bacterial infection
17121301826	Male	15	2017121514:30:49	Pneumonia
17092002124	Male	15	2017121512:24:27	Heat
17121403301	Male	15	2017121423:09:16	Air
17091001933	Male	15	2017121414:59:53	Respiratory infections
17121400063	Male	15	2017121402:55:27	Upper respiratory tract infection
17121303210	Male	15	2017121320:43:01	Chest pain
17121303186	Male	15	2017121320:25:08	Upper respiratory tract infection
17121303178	Male	15	2017121320:18:00	Upper respiratory tract infection
17121302883	Male	15	2017121316:41:29	Vomiting
17121302883	Male	15	2017121316:41:29	Heat
17121302872	Male	15	2017121316:34:37	Heat
17121302489	Male	15	2017121314:43:38	Chest tests
17121301826	Male	15	2017121311:50:05	Bacterial infection
17121301826	Male	15	2017121311:50:05	Pneumonia
17121301826	Male	15	2017121311:50:05	Heat
17121301193	Male	15	2017121309:46:21	Virus infection
17121301193	Male	15	2017121309:46:21	Cough
17121300068	Male	15	2017121303:44:16	Upper respiratory tract infection
17121201640	Male	15	2017121210:45:41	Intestinal infection
17121200625	Male	15	2017121208:10:10	Virus infection
17121200625	Male	15	2017121208:10:10	Heat
17121103757	Male	15	2017121200:02:19	Virus infection
17121103757	Male	15	2017121200:02:19	Heat
17121103745	Male	15	2017121122:13:59	Bacterial infection
17121103745	Male	15	2017121122:13:59	Respiratory infections
17120803343	Male	15	2017121117:55:33	Heat
17121102994	Male	15	2017121115:10:37	Respiratory infections
161230092709	Male	15	2017121111:10:16	The glass is cloudy
17121002323	Male	15	2017121023:46:13	Heat
17121001568	Male	15	2017121014:16:34	Cough
17120603158	Male	15	2017121007:58:54	Respiratory infections
17070700873	Male	15	2017121003:43:41	Upper respiratory tract infection
17120902938	Male	15	2017120921:55:41	Cough
17092302431	Male	15	2017120920:27:02	Heat
17120902806	Male	15	2017120919:56:42	Be palpitations
17120902687	Male	15	2017120918:30:50	Respiratory infections
17120900079	Male	15	2017120903:26:35	Heat
17120803343	Male	15	2017120823:29:30	Heat
17081102425	Male	15	2017120819:43:27	Palpitations
17080200943	Male	15	2017120819:17:53	Respiratory infections
17080200943	Male	15	2017120819:17:53	Heat
17080200943	Male	15	2017120819:17:53	Cough
17120802870	Male	15	2017120817:15:50	Upper respiratory tract infection
17120802867	Male	15	2017120817:14:10	Cough
17120801411	Male	15	2017120810:10:56	Respiratory infections
17120502057	Male	15	2017120809:48:52	Virus infection
17120301554	Male	15	2017120809:44:18	Bacterial infection
17120301554	Male	15	2017120809:44:18	Pulmonary infection
17120301554	Male	15	2017120710:52:34	Bacterial infection
17120301554	Male	15	2017120710:52:34	Pulmonary infection
17120603158	Male	15	2017120710:21:58	Respiratory infections
17120700206	Male	15	2017120706:55:19	Upper respiratory tract infection
17120700017	Male	15	2017120700:29:40	Heat
17120603514	Male	15	2017120620:46:26	Respiratory infections
17120603470	Male	15	2017120620:22:24	Heat
17120603453	Male	15	2017120620:14:32	Virus infection
17120603453	Male	15	2017120620:14:32	Respiratory infections
17112302780	Male	15	2017120617:44:20	Respiratory infections
17120603158	Male	15	2017120616:58:36	Respiratory infections
17120603158	Male	15	2017120616:58:36	Heat
17112102108	Male	15	2017120610:33:41	Foreign objects in the esophagus
17120600585	Male	15	2017120607:49:10	Upper respiratory tract infection
17120600585	Male	15	2017120607:49:10	Abdominal pain
17120600585	Male	15	2017120607:49:10	Abdominal pain
17120600075	Male	15	2017120603:57:40	Respiratory infections
17120503154	Male	15	2017120519:56:16	Respiratory infections
17120301554	Male	15	2017120514:33:28	Bacterial infection
17120301554	Male	15	2017120514:33:28	Pulmonary infection
17120502057	Male	15	2017120512:56:23	Virus infection
17120502057	Male	15	2017120512:56:23	Respiratory infections
17120402096	Male	15	2017120511:12:05	Cough
17120402096	Male	15	2017120511:12:05	Heat
17112700057	Male	15	2017120510:35:16	Pulmonary infection
17120500071	Male	15	2017120504:18:27	Intestinal infection
17120403480	Male	15	2017120419:44:23	Respiratory infections
17120402096	Male	15	2017120413:00:43	Bacterial infection
17120402096	Male	15	2017120413:00:43	Respiratory infections
17120402181	Male	15	2017120412:22:29	Bacterial infection
17120402181	Male	15	2017120412:22:29	Respiratory infections
17112700057	Male	15	2017120412:12:44	Pulmonary infection
17120401668	Male	15	2017120410:32:38	Bacterial infection
17120401668	Male	15	2017120410:32:38	Nausea and vomiting
17120301554	Male	15	2017120410:30:27	Bacterial infection
17120301554	Male	15	2017120410:30:27	Pulmonary infection
17120301867	Male	15	2017120318:15:16	Bronchitis
17120301867	Male	15	2017120318:15:16	Heat
17120301847	Male	15	2017120318:04:55	Bronchitis
17120301847	Male	15	2017120318:04:55	Heat
17120301554	Male	15	2017120314:51:02	Bacterial infection
17120301554	Male	15	2017120314:51:02	Pulmonary infection
17120301554	Male	15	2017120314:51:02	Cough
17112700057	Male	15	2017120307:09:22	Pulmonary infection
17112601299	Male	15	2017120215:38:22	Bronchitis
17120202209	Male	15	2017120215:18:23	Health check
17120201884	Male	15	2017120213:32:48	Intestinal infection
17120201884	Male	15	2017120213:32:48	Bacterial infection
17120201884	Male	15	2017120213:32:48	Hypokalemia
17120201884	Male	15	2017120213:32:48	Heat
17041200264	Male	15	2017120212:47:37	Upper respiratory tract infection
17120201028	Male	15	2017120209:26:45	Respiratory infections
17112700057	Male	15	2017120207:59:24	Pulmonary infection
17091903119	Male	15	2017120121:42:53	Respiratory infections
17120103242	Male	15	2017120121:24:46	Respiratory infections
17112700057	Male	15	2017120107:50:58	Pulmonary infection
17113003036	Male	15	2017113020:00:11	Bacterial infection
17113003036	Male	15	2017113020:00:11	Heat
17112700057	Male	15	2017113007:51:06	Pulmonary infection
17112900640	Male	15	2017112908:27:44	Hypertension
17112700057	Male	15	2017112907:34:26	Pulmonary infection
17112801806	Male	15	2017112811:50:31	Heat
17112800225	Male	15	2017112807:12:10	Respiratory infections
17112700057	Male	15	2017112805:07:04	Bacterial infection
17112700057	Male	15	2017112805:07:04	Heat
17112702080	Male	15	2017112711:40:51	Bronchitis
17112702080	Male	15	2017112711:40:51	Heat
17112702079	Male	15	2017112711:40:42	Bacterial infection
17112702079	Male	15	2017112711:40:42	Infectious fever
161230073146	Male	15	2017112708:59:56	Respiratory infections
17112700057	Male	15	2017112703:50:45	Bacterial infection
17112700057	Male	15	2017112703:50:45	Heat
17112601926	Male	15	2017112620:26:25	Bacterial infection
17112601926	Male	15	2017112620:26:25	Upper respiratory tract infection
17112601926	Male	15	2017112620:26:25	Heat
17112601732	Male	15	2017112617:55:44	Upper respiratory tract infection
17112601732	Male	15	2017112617:55:44	Heat
17112601299	Male	15	2017112612:53:13	Bronchitis
16123114987	Male	15	2017112518:55:03	Bacterial infection
16123114987	Male	15	2017112518:55:03	Upper respiratory tract infection
17112000005	Male	15	2017112415:57:41	Pulmonary infection
17112401382	Male	15	2017112410:34:39	Hypertension
17112401338	Male	15	2017112410:26:43	Abdominal pain
17112302780	Male	15	2017112318:45:16	Respiratory infections
17112302767	Male	15	2017112318:30:02	Abdominal pain
17112302670	Male	15	2017112317:03:08	Virus infection
17112302670	Male	15	2017112317:03:08	Heat
17111802344	Male	15	2017112311:29:35	Pulmonary infection
17112300343	Male	15	2017112307:28:17	Heat
17111002470	Male	15	2017112217:31:21	Respiratory infections
17112202233	Male	15	2017112214:11:50	Bacterial infection
17112202233	Male	15	2017112214:11:50	Heat
17111802344	Male	15	2017112211:38:25	Pulmonary infection
17112000005	Male	15	2017112209:53:30	Pulmonary infection
17112102190	Male	15	2017112114:09:24	Respiratory infections
17112102108	Male	15	2017112113:50:31	Bacterial infection
17112102108	Male	15	2017112113:50:31	Foreign objects in the esophagus
17111802344	Male	15	2017112111:21:32	Pulmonary infection
17112100318	Male	15	2017112107:34:50	Respiratory infections
17111802344	Male	15	2017112015:56:02	Pulmonary infection
17112002191	Male	15	2017112013:30:36	Heat
17112001956	Male	15	2017112012:15:38	Abdominal pain
17112000559	Male	15	2017112008:07:54	Heat
17112000302	Male	15	2017112007:20:17	After cardiology
17112000005	Male	15	2017112000:30:14	Pulmonary infection
17112000005	Male	15	2017112000:30:14	Heat
17111802344	Male	15	2017111920:54:58	Heat
17111802344	Male	15	2017111920:54:58	Pulmonary infection
17111900016	Male	15	2017111900:59:00	Dizziness
17111802344	Male	15	2017111820:47:05	Pulmonary infection
17111802344	Male	15	2017111820:47:05	Heat
17111801972	Male	15	2017111816:08:23	Infectious fever
17111801972	Male	15	2017111816:08:23	Thrombocytopenia
17111801972	Male	15	2017111816:08:23	Eczema?
17111801972	Male	15	2017111815:32:54	Respiratory infections
17111801972	Male	15	2017111815:32:54	Heat
161230092709	Male	15	2017111807:31:27	Respiratory infections
161230156187	Male	15	2017111709:02:54	Upper respiratory tract infection
17111700057	Male	15	2017111705:08:16	Abdominal pain appendicitis?
17111700057	Male	15	2017111705:08:16	Heat
17111602205	Male	15	2017111614:13:20	Bacterial infection
17111602205	Male	15	2017111614:13:20	Upper respiratory tract infection
17111502860	Male	15	2017111520:33:14	Bacterial infection
17111502860	Male	15	2017111520:33:14	Diarrhea
17111502782	Male	15	2017111519:27:31	Abdominal pain
17111501884	Male	15	2017111513:08:58	Heat
17111501483	Male	15	2017111510:52:10	Abdominal pain
17111500360	Male	15	2017111507:40:34	Bacterial infection
17111500360	Male	15	2017111507:40:34	Heat
17111302268	Male	15	2017111313:33:44	Abdominal pain
17111301439	Male	15	2017111310:14:25	Be palpitations
17111201722	Male	15	2017111219:04:34	Upper respiratory tract infection
17111201712	Male	15	2017111218:48:43	Upper respiratory tract infection
17111200585	Male	15	2017111209:17:32	Upper respiratory tract infection
17111002470	Male	15	2017111017:42:38	Bacterial infection
17111002470	Male	15	2017111017:42:38	Respiratory infections
17111002167	Male	15	2017111014:58:57	Headache
17111001527	Male	15	2017111011:09:22	Hyperuricaemia
17103002157	Male	15	2017111008:12:15	Digestive bleeding?
17110902706	Male	15	2017110916:46:10	Arrhythmia
17110901932	Male	15	2017110912:40:34	Infectious fever
17110803009	Male	15	2017110819:27:59	Mickory inflammation
17110801857	Male	15	2017110811:44:45	Chest pain
17110701952	Male	15	2017110807:25:12	Heat
17110701952	Male	15	2017110807:25:12	Lumbar pain
17110601678	Male	15	2017110610:39:21	Abdominal pain
17110500050	Male	15	2017110504:40:11	Cough
17110500050	Male	15	2017110504:40:11	Respiratory infections
17110400937	Male	15	2017110409:23:11	Respiratory infections
17110200768	Male	15	2017110208:40:17	Heat
17110102686	Male	15	2017110117:00:54	Chest pain
17103102971	Male	15	2017103122:15:22	Bacterial infection
17103102971	Male	15	2017103122:15:22	Respiratory infections
16123173746	Male	15	2017103113:07:22	Upper respiratory tract infection
16123173746	Male	15	2017103113:07:22	Heat
17103101599	Male	15	2017103111:13:54	Lackluster
17103003063	Male	15	2017103019:38:24	Chest pain
17103002157	Male	15	2017103013:11:21	Bacterial infection
17103002157	Male	15	2017103013:11:21	Digestive bleeding?
17103002018	Male	15	2017103012:11:05	Myocarditis?
17102300459	Male	15	2017102909:47:13	Pulmonary infection
17102300459	Male	15	2017102909:47:13	Bacterial infection
17102801658	Male	15	2017102813:00:42	Bacterial infection?
17102801658	Male	15	2017102813:00:42	Chest pain
17102801658	Male	15	2017102813:00:42	Abdominal pain
17101401418	Male	15	2017102709:04:49	Respiratory infections
17102602762	Male	15	2017102619:18:47	Mesenteric lymph node inflammation
17102602762	Male	15	2017102619:18:47	Abdominal pain
17101900007	Male	15	2017102615:11:45	Bacterial infection
17101900007	Male	15	2017102615:11:45	Respiratory infections
17102600326	Male	15	2017102607:33:15	Bacterial infection
17102600326	Male	15	2017102607:33:15	Intestinal infection
17102502795	Male	15	2017102519:40:07	Abdominal pain
17101900007	Male	15	2017102519:32:54	Bacterial infection
17101900007	Male	15	2017102519:32:54	Heat
17102502762	Male	15	2017102519:10:45	Respiratory infections
17101203195	Male	15	2017102316:14:34	Diabetic ketoacidosis
17102200026	Male	15	2017102311:48:15	Headache
17102200026	Male	15	2017102311:48:15	Heat
17102201652	Male	15	2017102220:05:23	Allergic asthma
17102201652	Male	15	2017102220:05:23	Respiratory infections
17102201577	Male	15	2017102218:34:14	Bacterial infection
17102201577	Male	15	2017102218:34:14	Respiratory infections
17102201498	Male	15	2017102217:19:43	Diarrhea
17102200663	Male	15	2017102209:39:14	Air
17102200026	Male	15	2017102202:02:25	Headache
17102200026	Male	15	2017102202:02:25	Heat
17101203195	Male	15	2017102120:28:23	Diabetic ketoacidosis
17102102132	Male	15	2017102115:57:28	Peptic ulcer?
17102002663	Male	15	2017102020:53:48	Hypertension
17101700413	Male	15	2017101914:50:10	Respiratory infections
17101702422	Male	15	2017101907:07:53	Intestinal infection
17101900007	Male	15	2017101900:36:52	Upper respiratory tract infection
17101900007	Male	15	2017101900:36:52	Heat
17101700413	Male	15	2017101815:37:36	Respiratory infections
17101700413	Male	15	2017101815:37:36	Bacterial infection
17011700790	Male	15	2017101807:36:50	Cough
17101702422	Male	15	2017101807:18:42	Intestinal infection
17101401553	Male	15	2017101718:06:14	Syncope
17101700413	Male	15	2017101707:53:04	Respiratory infections
17101700050	Male	15	2017101706:14:16	Intestinal infection
17101700050	Male	15	2017101706:14:16	Bacterial infection
17101700050	Male	15	2017101706:14:16	Abdominal pain
17101602084	Male	15	2017101613:05:07	Abdominal pain
17092002704	Male	15	2017101513:05:11	Respiratory infections
17100902176	Male	15	2017101506:05:12	Mickory inflammation
17101401553	Male	15	2017101412:36:11	Bacterial infection
17101401553	Male	15	2017101412:36:11	Syncope
17101401418	Male	15	2017101411:07:26	Respiratory infections
17100902176	Male	15	2017101406:03:44	Bacterial infection
17100902176	Male	15	2017101406:03:44	Mickory inflammation
17100902176	Male	15	2017101406:03:44	Infectious fever
17101301623	Male	15	2017101311:39:10	Abdominal pain
17101203195	Male	15	2017101305:19:41	Bacterial infection
17101203195	Male	15	2017101305:19:41	Diabetic ketoacidosis
17100902176	Male	15	2017101301:34:26	Bacterial infection
17100902176	Male	15	2017101301:34:26	Infectious fever
17101203195	Male	15	2017101223:43:49	Bacterial infection
17101203195	Male	15	2017101223:43:49	Diabetes
17101203195	Male	15	2017101223:43:49	Ketosis
17101203195	Male	15	2017101223:43:49	Nausea and vomiting
17101000372	Male	15	2017101008:34:17	Infectious fever
17101000039	Male	15	2017101005:54:56	Heat
161230044541	Male	15	2017100816:01:27	Bronchitis
17100100130	Male	15	2017100609:59:21	Hypertension
17100502793	Male	15	2017100521:51:24	Abdominal pain
161230044541	Male	15	2017100519:54:34	Bronchitis
17100501757	Male	15	2017100511:33:58	Enlarged cervical lymph nodes
17100100130	Male	15	2017100507:41:23	Hypertension
17010217323	Male	15	2017100415:57:00	Heat
17100300328	Male	15	2017100308:18:55	Abdominal pain
161230092709	Male	15	2017100307:33:25	Respiratory infections
17091001933	Male	15	2017100307:33:19	Respiratory infections
17100101037	Male	15	2017100119:41:36	Heat
17100101037	Male	15	2017100119:41:36	Respiratory infections
17092802407	Male	15	2017093010:50:39	Bronchitis
17092902363	Male	15	2017092920:39:59	Air
17092802407	Male	15	2017092910:57:30	Bronchitis
17092802407	Male	15	2017092817:11:13	Bronchitis
17092800425	Male	15	2017092807:50:25	Heat
17092600705	Male	15	2017092710:34:46	Heat
17092602641	Male	15	2017092619:38:06	Upper respiratory tract infection
17091903011	Male	15	2017092616:06:06	Pneumonia
17092601759	Male	15	2017092612:29:18	Chest pain
17092600705	Male	15	2017092608:34:53	Heat
17091903011	Male	15	2017092517:30:06	Pneumonia
161230092709	Male	15	2017092512:53:47	Mickory inflammation
17092501908	Male	15	2017092511:47:16	Upper respiratory tract infection
17092401914	Male	15	2017092422:51:25	Abdominal pain
16123191064	Male	15	2017092420:20:12	Spontaneous pneumothorax
16123191064	Male	15	2017092420:20:12	Respiratory infections
17091903011	Male	15	2017092417:36:53	Pneumonia
17092302431	Male	15	2017092318:46:55	Heat
17091903011	Male	15	2017092318:37:50	Pneumonia
17052600045	Male	15	2017092306:39:16	Intestinal infection
17092202769	Male	15	2017092221:57:22	Chest pain
17092002704	Male	15	2017092218:39:47	Respiratory infections
17091903011	Male	15	2017092217:37:57	Pneumonia
17052600045	Male	15	2017092217:30:00	Intestinal infection
17092202309	Male	15	2017092215:44:10	Upper respiratory tract infection
17092201849	Male	15	2017092213:25:15	Chest stuffy
17092103015	Male	15	2017092122:16:33	Hypokalemia
17092103015	Male	15	2017092122:16:33	Electrolyte disturbance
17091903011	Male	15	2017092117:17:03	Pneumonia
17092102678	Male	15	2017092116:31:38	Anemia
17092102678	Male	15	2017092116:31:38	Digestive bleeding
17092102652	Male	15	2017092116:18:01	Abdominal pain
17092102652	Male	15	2017092116:18:01	Chronic gastritis
17092100110	Male	15	2017092106:37:02	Respiratory infections
17092100039	Male	15	2017092102:31:58	Bronchitis
17092002704	Male	15	2017092018:01:45	Respiratory infections
17092002445	Male	15	2017092016:11:10	Diarrhea
17092002445	Male	15	2017092016:11:10	Abdominal pain
17091903011	Male	15	2017092016:02:24	Pneumonia
17092001649	Male	15	2017092011:16:47	Abdominal pain
17091903011	Male	15	2017091920:10:34	Pneumonia
17091803475	Male	15	2017091823:25:05	Asthma
17091803387	Male	15	2017091821:52:40	Bacterial infection
17091803387	Male	15	2017091821:52:40	Respiratory infections
17091800012	Male	15	2017091800:49:28	Abdominal pain
17091502549	Male	15	2017091518:14:37	Upper respiratory tract infection
17091502295	Male	15	2017091516:43:11	Headache
17091401849	Male	15	2017091412:42:42	Heat
17091400681	Male	15	2017091408:26:24	Be palpitations
17091302982	Male	15	2017091321:20:42	Gastritis
17091302982	Male	15	2017091321:20:42	Diarrhea
17091302982	Male	15	2017091321:20:42	Abdominal pain
17091001933	Male	15	2017091307:27:59	Bacterial infection
17091001933	Male	15	2017091307:27:59	Respiratory infections
17091202823	Male	15	2017091219:31:18	Bacterial infection
17091202823	Male	15	2017091219:31:18	Syncope
17091202823	Male	15	2017091219:31:18	Be palpitations
17091001933	Male	15	2017091209:07:35	Bacterial infection
17091001933	Male	15	2017091209:07:35	Respiratory infections
17091103177	Male	15	2017091120:01:51	Respiratory infections
17031001683	Male	15	2017091119:51:46	Upper respiratory tract infection
17031001683	Male	15	2017091119:51:46	Heat
17091103125	Male	15	2017091119:24:15	Bacterial infection
17091103125	Male	15	2017091119:24:15	Cough
17091001933	Male	15	2017091110:24:53	Bacterial infection
17091001933	Male	15	2017091110:24:53	Respiratory infections
17091001933	Male	15	2017091022:47:53	Bacterial infection
17091001933	Male	15	2017091022:47:53	Respiratory infections
17091001656	Male	15	2017091017:13:03	Respiratory infections
17090902515	Male	15	2017090920:36:06	Bacterial infection
17090902515	Male	15	2017090920:36:06	Infectious fever
17090902493	Male	15	2017090920:11:15	Breathing bronchitis
17090902493	Male	15	2017090920:11:15	Cough
17090902374	Male	15	2017090917:54:17	Cough
17090300244	Male	15	2017090910:55:46	Respiratory infections
17010102755	Male	15	2017090908:05:49	Respiratory infections
17090802077	Male	15	2017090814:42:43	Thrombocytopenia
17090802077	Male	15	2017090814:42:43	Respiratory infections
17090800748	Male	15	2017090808:36:45	Dizziness
17090800203	Male	15	2017090807:14:23	Abdominal pain
17090300244	Male	15	2017090806:18:15	Respiratory infections
17090300244	Male	15	2017090706:21:58	Respiratory infections
17090200034	Male	15	2017090621:04:48	Upper respiratory tract infection
17090200034	Male	15	2017090621:04:48	Cough
17090602641	Male	15	2017090616:39:51	Abdominal pain
17090300244	Male	15	2017090606:37:50	Respiratory infections
17090300244	Male	15	2017090506:41:53	Respiratory infections
17090300244	Male	15	2017090506:41:53	Purulent pachylitis
17090300244	Male	15	2017090406:40:51	Purulent pachylitis
17090300244	Male	15	2017090406:40:51	Respiratory infections
17090301673	Male	15	2017090320:32:06	Purulent pachylitis
17090301673	Male	15	2017090320:32:06	Respiratory infections
17090301673	Male	15	2017090320:32:06	Heat
17090300244	Male	15	2017090307:41:28	Respiratory infections
17090300001	Male	15	2017090300:38:28	Respiratory infections
17090202275	Male	15	2017090216:25:54	Diarrhea
17090200034	Male	15	2017090204:03:57	Cough
17090200034	Male	15	2017090204:03:57	Upper respiratory tract infection
17083102521	Male	15	2017083116:40:02	Respiratory infections
17082902706	Male	15	2017082922:02:50	Lackluster
17082902438	Male	15	2017082917:11:47	Diuretic blood
17082600023	Male	15	2017082601:34:30	Alcohol poisoning
17082402751	Male	15	2017082419:41:44	Respiratory infections
17082402716	Male	15	2017082418:48:03	Nacpoor
17082300334	Male	15	2017082307:28:50	Health check
161230092709	Male	15	2017082208:59:30	Hyperuricaemia
17082102508	Male	15	2017082114:36:39	Heat
17082001682	Male	15	2017082023:28:37	Diarrhea
17082001682	Male	15	2017082023:28:37	Vomiting
17082001682	Male	15	2017082023:28:37	Abdominal pain
17082000063	Male	15	2017082006:26:54	Cough
17081902147	Male	15	2017081919:17:30	Heat
17081902147	Male	15	2017081919:17:30	Abdominal pain
17081801509	Male	15	2017081810:50:02	Chest pain
17081700642	Male	15	2017081707:59:02	Abdominal pain
17081600075	Male	15	2017081706:11:25	Bacterial infection
17081600075	Male	15	2017081706:11:25	Heat
17081700048	Male	15	2017081703:49:20	Alcohol poisoning
17081600075	Male	15	2017081606:45:28	Heat
17062101282	Male	15	2017080914:26:01	Respiratory infections
17080601598	Male	15	2017080620:48:07	Respiratory infections
17080200943	Male	15	2017080209:09:26	Bacterial infection
17080200943	Male	15	2017080209:09:26	Bronchitis
17080102219	Male	15	2017080115:03:26	Eosinophilia
161230089795	Male	15	2017073022:30:29	Abdominal pain
17073000047	Male	15	2017073003:38:21	Chest stuffy
17072901874	Male	15	2017072915:19:26	Lackluster
17072802548	Male	15	2017072821:34:05	Bacterial infection
17072802548	Male	15	2017072821:34:05	Intestinal infection
17072802282	Male	15	2017072816:51:32	Chest pain
17072702330	Male	15	2017072715:26:50	Chest pain
17072502115	Male	15	2017072709:18:08	Infectious fever
17072502115	Male	15	2017072609:12:37	Infectious fever
17070900015	Male	15	2017072517:31:42	Heat
17072502115	Male	15	2017072514:19:10	Infectious fever
17072500803	Male	15	2017072511:12:51	Thin
161230069732	Male	15	2017072213:25:52	Heat
17072200047	Male	15	2017072204:27:13	Drunk
17072002659	Male	15	2017072023:40:19	Acute gastritis
17072000050	Male	15	2017072003:43:37	Bacterial infection
17072000050	Male	15	2017072003:43:37	Intestinal infection
17071900019	Male	15	2017071901:07:57	Abdominal pain
161230069732	Male	15	2017071712:02:30	Bronchitis
17070900015	Male	15	2017071621:54:05	Respiratory infections
17071600067	Male	15	2017071605:40:54	Infectious fever
17071102417	Male	15	2017071118:48:50	Abdominal pain
17071002767	Male	15	2017071021:15:29	Diarrhea
17071002767	Male	15	2017071021:15:29	Heat
17070602388	Male	15	2017071014:26:47	Unconscious
17070602388	Male	15	2017071014:26:47	Leukemia
17071000038	Male	15	2017071003:28:33	Abdominal pain
17070900015	Male	15	2017070900:46:07	Bacterial infection
17070900015	Male	15	2017070900:46:07	Heat
17010217323	Male	15	2017070812:37:50	Bacterial infection
17010217323	Male	15	2017070812:37:50	Heat
17070602388	Male	15	2017070621:03:46	Cough
17070602388	Male	15	2017070621:03:46	Leukemia
17010401861	Male	15	2017070319:23:56	Bacterial infection
17010401861	Male	15	2017070319:23:56	Respiratory infections
17010401861	Male	15	2017070319:23:56	Heat
17070201296	Male	15	2017070313:09:24	Twitching
17070301255	Male	15	2017070309:48:19	Cough
17070201435	Male	15	2017070220:31:19	Heat
17070201435	Male	15	2017070220:31:19	Heart failure
17070201435	Male	15	2017070220:31:19	Abdominal pain
17070201435	Male	15	2017070220:31:19	Diarrhea
17070201296	Male	15	2017070217:14:10	Twitching
17070102184	Male	15	2017070121:58:27	Heat
17062701949	Male	15	2017070121:11:05	Leukemia
17063002301	Male	15	2017063019:30:15	Cough
17062902547	Male	15	2017062921:22:20	Chest pain
17062400798	Male	15	2017062919:12:29	Heat
17062701949	Male	15	2017062713:49:59	Leukemia
17062501475	Male	15	2017062518:32:35	Bronchitis
17062501475	Male	15	2017062518:32:35	Bacterial infection
17062400798	Male	15	2017062509:17:02	Bacterial infection
17062400798	Male	15	2017062509:17:02	Heat
17062400798	Male	15	2017062409:14:31	Bacterial infection
17062400798	Male	15	2017062409:14:31	Heat
17062201808	Male	15	2017062215:24:41	Leukemia
17051100618	Male	15	2017062207:07:33	Chest pain
17062100636	Male	15	2017062108:20:19	Nausea and vomiting
17062002179	Male	15	2017062015:54:22	Bronchitis
17062002179	Male	15	2017062015:54:22	Headache
17062002179	Male	15	2017062015:54:22	Heat
17062001802	Male	15	2017062014:29:53	Lymph node inflammation
17061801593	Male	15	2017061823:39:35	Air
17061701944	Male	15	2017061716:14:54	Heat
17061302790	Male	15	2017061520:09:38	Leukemia
17061402323	Male	15	2017061415:35:12	Bacterial infection
17061402323	Male	15	2017061415:35:12	Vomiting
17061302835	Male	15	2017061323:02:19	Vomiting
17061302835	Male	15	2017061323:02:19	Heat
17061302790	Male	15	2017061321:55:33	Leukemia
17061302165	Male	15	2017061314:46:54	Abdominal pain
17061300484	Male	15	2017061307:49:12	Urinary infection
17061101688	Male	15	2017061121:16:43	Bronchitis
17061101688	Male	15	2017061121:16:43	Heat
17061002266	Male	15	2017061022:56:35	Chest stuffy
17060901192	Male	15	2017060909:48:04	Bacterial infection
17060901192	Male	15	2017060909:48:04	Abdominal pain
17060801573	Male	15	2017060810:24:12	Heat
17060702837	Male	15	2017060719:59:42	Allergic rhinitis
17060702837	Male	15	2017060719:59:42	Bronchial asthma
17060702807	Male	15	2017060719:35:47	Foreign object in esophagus
17060302458	Male	15	2017060718:43:37	Pulmonary infection
17060602580	Male	15	2017060619:56:42	Anemia
17060602580	Male	15	2017060619:56:42	Leukemia
17060302458	Male	15	2017060607:48:57	Pulmonary infection
17060302458	Male	15	2017060607:48:57	Infectious fever
17060503245	Male	15	2017060522:28:03	Vomiting
17060302458	Male	15	2017060507:35:07	Infectious fever
17060500311	Male	15	2017060507:21:18	Be palpitations
17060400386	Male	15	2017060409:14:05	Respiratory infections
17060302458	Male	15	2017060408:14:51	Infectious fever
17060302411	Male	15	2017060322:04:55	Gastritis
17060302411	Male	15	2017060322:04:55	Bacterial infection
17060100035	Male	15	2017060311:11:50	Heat
17060100035	Male	15	2017060311:11:50	Abdominal pain
17060202652	Male	15	2017060219:44:52	Chest pain
17060202046	Male	15	2017060213:54:44	Abdominal pain
17060100035	Male	15	2017060207:01:31	Bacterial infection
17060100035	Male	15	2017060207:01:31	Heat
17060100035	Male	15	2017060207:01:31	Abdominal pain
17052600045	Male	15	2017060114:06:50	Anemia
17052600045	Male	15	2017060114:06:50	Diarrhea
17053102073	Male	15	2017060109:07:18	Lackluster
17060100035	Male	15	2017060102:06:44	Bacterial infection
17060100035	Male	15	2017060102:06:44	Abdominal pain
17053102073	Male	15	2017053113:17:09	Lackluster
17052600045	Male	15	2017052907:31:44	Urinary tract infection
17052801528	Male	15	2017052819:59:21	Foreign objects in the esophagus
17052702102	Male	15	2017052722:29:04	Syncope
17052702078	Male	15	2017052721:45:04	Upper respiratory tract infection
17052202338	Male	15	2017052716:22:01	Bronchitis
17052700536	Male	15	2017052708:15:12	Heat
17052601864	Male	15	2017052613:33:10	Chest pain
17052600045	Male	15	2017052603:17:59	Urinary tract infection
17052600045	Male	15	2017052603:17:59	Haematuria
17052502755	Male	15	2017052520:28:39	Vomiting
17052502755	Male	15	2017052520:28:39	Gastritis
17052502717	Male	15	2017052519:50:21	Respiratory infections
17052402860	Male	15	2017052420:13:05	Abdominal pain
17051301786	Male	15	2017052311:10:57	Polygonal erythema
17052202338	Male	15	2017052214:30:49	Bronchitis
17052201673	Male	15	2017052210:35:59	Bacterial infection
17052201673	Male	15	2017052210:35:59	Heat
17050101263	Male	15	2017052110:14:24	Pneumonia
17051902488	Male	15	2017051917:55:32	Air
17051901968	Male	15	2017051913:36:06	Digestive bleeding?
17051901945	Male	15	2017051913:28:17	Asthma
17051702941	Male	15	2017051719:23:27	Diarrhea
17051700100	Male	15	2017051706:44:21	Bacterial infection
17051700100	Male	15	2017051706:44:21	Abdominal pain
17051602958	Male	15	2017051621:45:45	Bacterial infection
17051602958	Male	15	2017051621:45:45	Lumbar abdominal pain to be examined
17051602953	Male	15	2017051621:23:09	Upper respiratory tract infection
17051602330	Male	15	2017051614:24:07	Diarrhea
17051502622	Male	15	2017051513:58:40	Heat
17051301786	Male	15	2017051513:47:35	Respiratory infections
17051301955	Male	15	2017051320:55:31	Respiratory infections
17051202848	Male	15	2017051300:01:13	Bacterial infection
17051202848	Male	15	2017051300:01:13	Bronchitis
17051202848	Male	15	2017051300:01:13	Infectious fever
17051202513	Male	15	2017051216:36:42	Ketosis
17051202513	Male	15	2017051216:36:42	Gastritis
17051202513	Male	15	2017051216:36:42	Vomiting
17051001442	Male	15	2017051010:12:29	Abdominal pain
17050902259	Male	15	2017050914:06:26	Hypertension
17050802366	Male	15	2017050812:53:04	Mickory inflammation
17050701795	Male	15	2017050720:35:10	Bacterial infection
17050701795	Male	15	2017050720:35:10	Ketosis
17050701795	Male	15	2017050720:35:10	Vomiting
17050101263	Male	15	2017050711:24:08	Pneumonia
17050602543	Male	15	2017050621:24:13	Bacterial infection
17050101263	Male	15	2017050608:19:09	Pneumonia
17050502768	Male	15	2017050522:21:47	Vomiting
17042301169	Male	15	2017050522:08:24	Respiratory infections
17050502334	Male	15	2017050515:34:35	Bronchial asthma
17050502334	Male	15	2017050515:34:35	Respiratory infections
17050101263	Male	15	2017050509:53:03	Pneumonia
17050500007	Male	15	2017050500:24:55	Cough
17050101263	Male	15	2017050408:44:34	Pneumonia
17050101263	Male	15	2017050408:44:34	Pleurisy
17050101263	Male	15	2017050307:25:29	Pneumonia
17050101263	Male	15	2017050307:25:29	Pleurisy
17050202847	Male	15	2017050216:50:05	Abdominal pain
17050101263	Male	15	2017050206:29:25	Pleurisy
17050101263	Male	15	2017050206:29:25	Pneumonia
17050200066	Male	15	2017050205:16:59	Bacterial infection
17050200066	Male	15	2017050205:16:59	Heat
17041102749	Male	15	2017050116:52:38	Lymphoma
17041102749	Male	15	2017050116:52:38	Epilepsy
17041102749	Male	15	2017050116:52:38	Respiratory failure
17041102749	Male	15	2017050116:52:38	Pulmonary bleeding
17050101263	Male	15	2017050113:31:14	Pneumonia
17010256767	Male	15	2017043010:20:45	Pneumothorax?
17010256767	Male	15	2017043010:20:45	Chest pain
17042502538	Male	15	2017043008:46:15	Pneumonia
17042502538	Male	15	2017042908:24:55	Pneumonia
17042502538	Male	15	2017042817:33:43	Pneumonia
17042802639	Male	15	2017042816:43:28	Heat
17042802421	Male	15	2017042815:25:20	Abdominal pain
17042801345	Male	15	2017042810:04:42	Vomiting
17042801345	Male	15	2017042810:04:42	Abdominal pain
17032903016	Male	15	2017042718:58:35	Respiratory infections
17042502538	Male	15	2017042716:54:10	Pulmonary infection
17042700451	Male	15	2017042707:45:34	Acute bronchitis
17042602985	Male	15	2017042623:02:30	Vomiting
17042502538	Male	15	2017042608:08:09	Pulmonary infection
17042502538	Male	15	2017042514:50:11	Haemoptysis
17042500709	Male	15	2017042508:12:18	Bacterial infection
17042500709	Male	15	2017042508:12:18	Heat
17032903016	Male	15	2017042419:58:00	Bacterial infection
17032903016	Male	15	2017042419:58:00	Respiratory infections
17042403129	Male	15	2017042417:09:54	Bacterial infection
17042403129	Male	15	2017042417:09:54	Heat
17042400454	Male	15	2017042407:37:51	Infectious fever
17042301822	Male	15	2017042318:33:49	Virus infection
17042301822	Male	15	2017042318:33:49	Respiratory infections
17042300058	Male	15	2017042305:35:48	Upper abdominal pain
17042202364	Male	15	2017042217:53:17	Chest pain
17041700744	Male	15	2017042211:27:08	Pneumonia
17042102477	Male	15	2017042115:56:47	Abdominal pain
17042003154	Male	15	2017042023:11:07	Gastritis
17042003154	Male	15	2017042023:11:07	Vomiting
17042002946	Male	15	2017042019:06:38	Cough
17041700744	Male	15	2017042010:19:22	Bronchitis
17041700744	Male	15	2017042010:19:22	Pneumonia
17042001550	Male	15	2017042010:16:39	Heat
17042000016	Male	15	2017042000:59:21	Headache
17041902101	Male	15	2017041913:14:16	Respiratory infections
17041700744	Male	15	2017041908:20:38	Pneumonia
17041802882	Male	15	2017041819:42:01	Chronic gastritis
17041802882	Male	15	2017041819:42:01	Upper respiratory tract infection
17041802795	Male	15	2017041817:56:09	Respiratory infections
17041700744	Male	15	2017041809:29:02	Pneumonia
17041800116	Male	15	2017041806:52:53	Heat
17041703211	Male	15	2017041719:30:00	Abdominal pain
17041702800	Male	15	2017041715:41:25	Bronchitis
17041700744	Male	15	2017041708:23:22	Pneumonia
17041700744	Male	15	2017041708:23:22	Respiratory infections
17041700178	Male	15	2017041707:16:56	Lackluster
17041601839	Male	15	2017041622:15:46	Bronchial asthma?
17041601839	Male	15	2017041622:15:46	Bronchitis
17022200345	Male	15	2017041607:13:39	Chest pain
17022200345	Male	15	2017041509:27:19	Chest pain
17041401004	Male	15	2017041409:07:44	Gastritis
17041401004	Male	15	2017041409:07:44	Chest pain
17041302926	Male	15	2017041318:46:26	Respiratory infections
17041300241	Male	15	2017041307:11:59	Be palpitations
17041102994	Male	15	2017041216:45:51	Respiratory infections
17041200016	Male	15	2017041200:36:36	Vomiting
17041102994	Male	15	2017041118:22:39	Respiratory infections
16123191064	Male	15	2017041114:24:23	Respiratory infections
17041003383	Male	15	2017041019:30:27	Respiratory infections
17041000034	Male	15	2017041002:31:09	Respiratory infections
17041000034	Male	15	2017041002:31:09	Chest stuffy
17041000031	Male	15	2017041002:02:04	Respiratory infections
17040901772	Male	15	2017040921:05:32	Bacterial infection
17040901772	Male	15	2017040921:05:32	Heat
17040901772	Male	15	2017040921:05:32	Nausea and vomiting
17040801813	Male	15	2017040813:01:14	Cough
17040401538	Male	15	2017040416:32:04	Upper respiratory tract infection
17040400463	Male	15	2017040408:29:19	Upper abdominal pain
17033000003	Male	15	2017040407:55:02	Pleural effusion
17033000003	Male	15	2017040407:55:02	Pulmonary infection
17040300221	Male	15	2017040307:11:32	Cough
17040201603	Male	15	2017040218:37:56	Bacterial infection
17040201603	Male	15	2017040218:37:56	Ketosis
17040201603	Male	15	2017040218:37:56	Vomiting
17040200822	Male	15	2017040209:45:12	Be palpitations
17040102412	Male	15	2017040122:01:09	Bacterial infection
17040102412	Male	15	2017040122:01:09	Respiratory infections
17032903016	Male	15	2017040120:59:43	Respiratory infections
17040102305	Male	15	2017040119:59:56	Tracheitis
17040102305	Male	15	2017040119:59:56	Respiratory infections
17033000003	Male	15	2017040119:24:57	Pulmonary infection
17040101708	Male	15	2017040113:57:18	Allergic asthma
17040101708	Male	15	2017040113:57:18	Respiratory infections
17040101540	Male	15	2017040112:34:37	Chest pain
17033000003	Male	15	2017033118:33:13	Pulmonary infection
17033000003	Male	15	2017033118:33:13	Pleural effusion
17033100547	Male	15	2017033108:05:45	Hypertension
17033100480	Male	15	2017033107:52:21	Allergies
17033000003	Male	15	2017033000:09:46	Bacterial infection
17033000003	Male	15	2017033000:09:46	Respiratory infections
17033000003	Male	15	2017033000:09:46	Pleural effusion
17033000003	Male	15	2017033000:09:46	Chest pain
17032903016	Male	15	2017032919:29:57	Respiratory infections
17032903011	Male	15	2017032919:25:04	Abdominal pain
17032902170	Male	15	2017032913:32:56	Headache
17032902138	Male	15	2017032913:19:56	Abdominal pain
17032701794	Male	15	2017032710:47:33	Chest back pain
17032601498	Male	15	2017032617:17:00	Chest pain
17032501057	Male	15	2017032509:41:17	Respiratory infections
161230092709	Male	15	2017032507:38:56	Heat
17031901376	Male	15	2017032221:36:51	Bacterial infection
17031901376	Male	15	2017032221:36:51	Respiratory infections
17032202978	Male	15	2017032217:25:34	Heat
17031901415	Male	15	2017031914:40:43	Pneumonia
17031901376	Male	15	2017031914:08:23	Bacterial infection
17031901376	Male	15	2017031914:08:23	Respiratory infections
17031802732	Male	15	2017031819:46:39	Bronchitis
17031703026	Male	15	2017031721:27:55	Bronchitis
17031603376	Male	15	2017031622:13:18	Respiratory infections
17031501647	Male	15	2017031510:29:44	Respiratory infections
17031101350	Male	15	2017031415:59:38	Infectious fever
17031101350	Male	15	2017031415:59:38	Virus infection
17031400142	Male	15	2017031406:57:22	Heating for more than a week
17031303556	Male	15	2017031319:08:27	Heat
17031301870	Male	15	2017031310:31:40	Chest stuffy
17031201919	Male	15	2017031222:22:18	Respiratory infections
17031102982	Male	15	2017031121:54:54	Asthma
17031102430	Male	15	2017031116:33:02	Hypertension
17031101350	Male	15	2017031110:01:55	Infectious fever
17031001683	Male	15	2017031010:21:40	Respiratory infections
17031001208	Male	15	2017031009:14:30	Low heat
17030903503	Male	15	2017030923:46:27	Bronchitis
17030902920	Male	15	2017030915:27:45	Headache
17030900004	Male	15	2017030900:09:43	Chest stuffy
17030800966	Male	15	2017030808:53:54	Acute gastritis
17030700292	Male	15	2017030707:22:17	Lackluster
17030603501	Male	15	2017030618:52:56	Syncope
17030600937	Male	15	2017030608:39:11	Chest pain
17030402854	Male	15	2017030417:46:33	Abdominal pain
17030400459	Male	15	2017030407:43:19	Endocrine dysfunction
17030303147	Male	15	2017030319:00:45	Conditioning
17030300031	Male	15	2017030302:57:13	Infectious fever
17030202410	Male	15	2017030213:22:27	Lackluster
17030201971	Male	15	2017030211:06:51	Chest stuffy
17030103321	Male	15	2017030121:43:39	Bronchitis
17030102710	Male	15	2017030115:01:55	Abdominal pain
17030102710	Male	15	2017030115:01:55	Diarrhea
17030102152	Male	15	2017030113:00:20	Diarrhea
17030100450	Male	15	2017030107:41:14	Respiratory infections
17022802264	Male	15	2017022813:04:52	Respiratory infections
17022800052	Male	15	2017022804:11:42	Respiratory infections
17022701931	Male	15	2017022710:41:38	Respiratory infections
17021601182	Male	15	2017022606:38:45	Acute machitis
17022502676	Male	15	2017022516:34:46	Infectious fever
17022502401	Male	15	2017022514:41:26	Respiratory infections
17022400602	Male	15	2017022507:16:31	Purulent pachylitis
17021601182	Male	15	2017022504:22:18	Conditioning
17022303230	Male	15	2017022418:27:43	Respiratory infections
161230092709	Male	15	2017022417:41:51	Respiratory infections
17022400692	Male	15	2017022408:36:45	Abdominal pain
17022400602	Male	15	2017022408:15:57	Purulent pachylitis
17022400002	Male	15	2017022400:27:03	Abdominal pain
17022303230	Male	15	2017022320:32:58	Respiratory infections
17022303201	Male	15	2017022319:59:26	Respiratory infections
17022303201	Male	15	2017022319:59:26	Heat
17021601182	Male	15	2017022319:35:24	Infectious fever
17021601182	Male	15	2017022319:35:24	Otitis media
17021601182	Male	15	2017022319:35:24	Throat inflammation
17021601182	Male	15	2017022319:35:24	Allergic rhinitis
17022300093	Male	15	2017022306:52:14	Upper respiratory tract infection
17022201654	Male	15	2017022212:54:54	Anemia
17022201654	Male	15	2017022212:54:54	Mickory inflammation
17022201654	Male	15	2017022212:54:54	Upper respiratory tract infection
161230069711	Male	15	2017022017:31:24	Foreign objects in the esophagus
17021901744	Male	15	2017021918:01:23	Cough
17021802763	Male	15	2017021819:47:27	Upper abdominal pain
17021802685	Male	15	2017021817:56:39	Bronchitis
17021703231	Male	15	2017021723:14:51	Bronchitis
17021700868	Male	15	2017021708:48:44	Nephritis
17021601182	Male	15	2017021609:13:09	Infectious fever
17021201759	Male	15	2017021221:23:13	Bacterial infection
17021201759	Male	15	2017021221:23:13	Abdominal pain
17021201602	Male	15	2017021217:56:05	Gastritis
17021100019	Male	15	2017021101:07:52	Diarrhea
17021100019	Male	15	2017021101:07:52	Abdominal pain
17021002694	Male	15	2017021016:32:46	Coronary heart disease
17020900639	Male	15	2017020908:00:53	Abdominal pain
17020701544	Male	15	2017020709:47:26	Respiratory infections
17020700798	Male	15	2017020708:16:51	Respiratory infections
17020700798	Male	15	2017020708:16:51	Chronic gastritis
17020700798	Male	15	2017020708:16:51	Sleep disorders
17020201938	Male	15	2017020411:35:37	Respiratory infections
17020201938	Male	15	2017020310:43:29	Respiratory infections
17020300046	Male	15	2017020303:16:57	Respiratory infections
17020300046	Male	15	2017020303:16:57	Heat
17020202848	Male	15	2017020220:45:07	Stomach cramps
17020201938	Male	15	2017020212:30:02	Respiratory infections
17020200057	Male	15	2017020204:42:23	Infectious fever
17020200017	Male	15	2017020200:36:48	Respiratory infections
17020200017	Male	15	2017020200:36:48	Heat
17013100051	Male	15	2017013103:24:49	Stomach retention
17013100051	Male	15	2017013103:24:49	Abdominal pain
17012800463	Male	15	2017012814:08:29	Chest stuffy
17012500645	Male	15	2017012707:53:40	Infectious fever
17012602144	Male	15	2017012621:50:25	Respiratory infections
17012602075	Male	15	2017012620:11:23	Bacterial infection
17012602075	Male	15	2017012620:11:23	Gastritis
17012500645	Male	15	2017012609:09:37	Sepsis
17012500645	Male	15	2017012609:09:37	Infectious fever
17012401295	Male	15	2017012608:10:31	Heat
17012500645	Male	15	2017012508:48:21	Sepsis
17012500645	Male	15	2017012508:48:21	Infectious fever
17012401295	Male	15	2017012410:18:44	Virus infection
17012400008	Male	15	2017012400:35:29	Diarrhea
17012400008	Male	15	2017012400:35:29	Vomiting
17011500503	Male	15	2017012313:34:18	Bacterial infection
17011500503	Male	15	2017012313:34:18	Upper respiratory tract infection
17012301860	Male	15	2017012310:55:24	Abdominal discomfort pending
17011903329	Male	15	2017011919:43:12	Respiratory infections
17011500503	Male	15	2017011814:33:50	Upper respiratory tract infection
17011500503	Male	15	2017011814:33:50	Virus infection
17011401740	Male	15	2017011809:17:57	Cerebral palsy
17011401740	Male	15	2017011809:17:57	Respiratory infections
17011800295	Male	15	2017011807:17:30	Respiratory infections
17011703701	Male	15	2017011719:08:41	Severe pneumonia
17011500503	Male	15	2017011710:48:44	Virus infection
17011500503	Male	15	2017011710:48:44	Upper respiratory tract infection
17011602057	Male	15	2017011610:20:58	Laboratory tests
17011602053	Male	15	2017011610:20:57	Laboratory tests
17011500503	Male	15	2017011610:15:39	Infectious monocytosis?
17011500503	Male	15	2017011610:15:39	Upper respiratory tract infection
17011500503	Male	15	2017011610:15:39	Heat
17011103857	Male	15	2017011609:03:23	Infectious fever
17011501010	Male	15	2017011510:00:30	Respiratory infections
17011500503	Male	15	2017011509:15:23	Infectious monocytosis?
17011500503	Male	15	2017011509:15:23	Virus infection
17011500503	Male	15	2017011509:15:23	Upper respiratory tract infection
17011103857	Male	15	2017011508:54:09	Infectious fever
17011401740	Male	15	2017011508:36:50	Cerebral palsy
17011401740	Male	15	2017011508:36:50	Gastritis
17011401740	Male	15	2017011508:36:50	Respiratory infections
17011500064	Male	15	2017011505:56:50	Diarrhea
17011500064	Male	15	2017011505:56:50	Abdominal pain
17011403338	Male	15	2017011422:08:03	Respiratory infections
17011100519	Male	15	2017011411:21:29	Hematology
17011401740	Male	15	2017011410:43:23	Cerebral palsy
17011401740	Male	15	2017011410:43:23	Infectious fever
17011103857	Male	15	2017011407:58:01	Infectious fever
17011303609	Male	15	2017011321:08:53	Virus infection
17011303609	Male	15	2017011321:08:53	Pneumonia
17011303609	Male	15	2017011321:08:53	Liver function damage
17011303609	Male	15	2017011321:08:53	Sepsis
17011103857	Male	15	2017011310:07:15	Infectious fever
17011300057	Male	15	2017011302:55:20	Bacterial infection
17011300057	Male	15	2017011302:55:20	Abdominal pain
17011204122	Male	15	2017011220:49:02	Cerebral palsy
17011204122	Male	15	2017011220:49:02	Myocarditis?
17011204122	Male	15	2017011220:49:02	Heat to be checked
17011103857	Male	15	2017011209:15:17	Infectious fever
17011103857	Male	15	2017011117:36:45	Infectious fever
17011100519	Male	15	2017011107:33:41	Anemia
17010902507	Male	15	2017010910:29:00	Diarrhea
17010900073	Male	15	2017010902:45:39	Respiratory infections
17010701680	Male	15	2017010811:02:23	Respiratory infections
17010800026	Male	15	2017010800:19:06	Upper respiratory tract infection
17010702646	Male	15	2017010713:20:18	Tracheitis
17010701680	Male	15	2017010709:53:33	Respiratory infections
17010700894	Male	15	2017010708:09:41	Gout disease
17010604521	Male	15	2017010623:49:39	Abdominal pain
17010404883	Male	15	2017010422:16:17	Myocarditis
17010404883	Male	15	2017010422:16:17	Hypertension
17010404408	Male	15	2017010416:22:59	Ketosis
17010404408	Male	15	2017010416:22:59	Gastritis
17010404408	Male	15	2017010416:22:59	Diarrhea
17010404408	Male	15	2017010416:22:59	Abdominal pain
17010108906	Male	15	2017010312:59:51	Pulmonary infection
17010108906	Male	15	2017010312:59:51	Infectious fever
17010224444	Male	15	2017010209:16:58	Pneumonia
17010146428	Male	15	2017010200:19:51	Bronchitis
17010146428	Male	15	2017010200:19:51	Cough disease
17010146428	Male	15	2017010121:47:51	Cough
17010108906	Male	15	2017010110:30:06	Pneumonia
17123100730	Female	15	2017123109:48:10	Respiratory infections
17123100624	Female	15	2017123109:32:23	Respiratory infections
17123100579	Female	15	2017123109:08:26	Bronchitis
17031802664	Female	15	2017123011:29:59	Upper respiratory tract infection
17122802679	Female	15	2017122818:27:24	Be palpitations
17122802531	Female	15	2017122816:34:00	Tracheitis
17122802317	Female	15	2017122815:09:00	Upper respiratory tract infection
16123182865	Female	15	2017122809:40:48	Respiratory infections
16123119477	Female	15	2017122807:42:41	Respiratory infections
16123119477	Female	15	2017122807:42:41	Heat
161230108542	Female	15	2017122723:32:03	Heat
161230108542	Female	15	2017122723:32:03	Upper respiratory tract infection
17122702784	Female	15	2017122719:19:32	Abdominal pain
17122702784	Female	15	2017122719:19:32	Syncope
17122702066	Female	15	2017122713:49:47	Bronchitis
17122702066	Female	15	2017122713:49:47	Cough
17122602857	Female	15	2017122619:19:01	Respiratory infections
17122000617	Female	15	2017122612:01:17	Virus infection
17122000617	Female	15	2017122612:01:17	Upper respiratory tract infection
17122501740	Female	15	2017122609:49:53	Heat Pending?
17122503007	Female	15	2017122517:50:32	Infectious fever
17122502770	Female	15	2017122515:53:17	Respiratory infections
17122502746	Female	15	2017122515:49:10	Respiratory infections
17122501740	Female	15	2017122511:04:00	Heat Pending?
17122501501	Female	15	2017122510:26:51	Acute gastritis
17122501501	Female	15	2017122510:26:51	Respiratory infections
17122500085	Female	15	2017122504:18:39	Respiratory infections
161231103864	Female	15	2017122420:07:07	Respiratory infections
161231103864	Female	15	2017122420:07:07	Heat
17122401664	Female	15	2017122417:48:12	Respiratory infections
17122401664	Female	15	2017122417:48:12	Heat
17122302014	Female	15	2017122315:04:54	Bronchitis
17122302014	Female	15	2017122315:04:54	Cough
17122301043	Female	15	2017122309:49:04	Upper respiratory tract infection
17122000617	Female	15	2017122308:33:14	Upper respiratory tract infection
17122300476	Female	15	2017122307:52:24	Respiratory infections
17122202652	Female	15	2017122217:15:40	Respiratory infections
17120100561	Female	15	2017122207:56:50	Abdominal pain
17122103056	Female	15	2017122120:56:00	Upper respiratory tract infection
17122102916	Female	15	2017122119:29:53	Respiratory infections
17122102916	Female	15	2017122119:29:53	Heat
17122102831	Female	15	2017122118:11:13	Back pain
17122100889	Female	15	2017122109:01:45	Diabetes
17122100390	Female	15	2017122107:35:13	Respiratory infections
17122000617	Female	15	2017122008:06:24	Virus infection
17122000617	Female	15	2017122008:06:24	Cough
17121900661	Female	15	2017122007:14:52	Respiratory infections
17121902984	Female	15	2017121919:09:03	Respiratory infections
17121900661	Female	15	2017121908:23:05	Respiratory infections
17121900115	Female	15	2017121906:23:08	Virus infection
17121900115	Female	15	2017121906:23:08	Heat
17121803292	Female	15	2017121818:40:27	Bacterial infection
17121803292	Female	15	2017121818:40:27	Cough disease
17121502598	Female	15	2017121818:02:39	Respiratory infections
17121802109	Female	15	2017121812:03:17	Respiratory infections
17121801400	Female	15	2017121809:58:07	Upper respiratory tract infection
17121801394	Female	15	2017121809:56:48	Respiratory infections
17121402928	Female	15	2017121712:04:07	Respiratory infections
17121700384	Female	15	2017121707:59:08	Heat
17121700053	Female	15	2017121702:00:49	Respiratory infections
17121602422	Female	15	2017121618:58:48	Upper respiratory tract infection
17121402928	Female	15	2017121614:29:13	Respiratory infections
17121601432	Female	15	2017121611:08:49	Bronchitis?
17121601432	Female	15	2017121611:08:49	Cough disease
17121601375	Female	15	2017121610:52:36	Infectious fever
161230020023	Female	15	2017121609:50:08	Respiratory infections
17121402928	Female	15	2017121516:47:09	Respiratory infections
17121502598	Female	15	2017121516:10:22	Respiratory infections
17121502398	Female	15	2017121515:03:41	Bacterial infection
17121502398	Female	15	2017121515:03:41	Chest pain
17121502261	Female	15	2017121514:22:53	Respiratory infections
17121101192	Female	15	2017121506:52:54	Bacterial infection
17121101192	Female	15	2017121506:52:54	Abdominal pain
17121402963	Female	15	2017121418:00:57	Chest pain
17121402928	Female	15	2017121417:33:21	Respiratory infections
17121401814	Female	15	2017121411:25:40	Headache
17121103291	Female	15	2017121409:29:52	Respiratory infections
17121103291	Female	15	2017121409:29:52	Bronchitis
17121101192	Female	15	2017121406:44:46	Bacterial infection
17121101192	Female	15	2017121406:44:46	Abdominal pain
17121400038	Female	15	2017121401:08:38	Allergies
17121303371	Female	15	2017121323:15:26	Acute gastritis
17121303016	Female	15	2017121318:17:06	Heat
17121302479	Female	15	2017121314:45:07	Lackluster
17121103291	Female	15	2017121309:37:11	Bronchitis
17121103291	Female	15	2017121309:37:11	Respiratory infections
17121202206	Female	15	2017121213:32:58	Heat
17121101192	Female	15	2017121211:30:57	Bacterial infection
17121101192	Female	15	2017121211:30:57	Abdominal pain
17121103291	Female	15	2017121209:36:47	Respiratory infections
17060201076	Female	15	2017121200:08:06	Bacterial infection
17060201076	Female	15	2017121200:08:06	Heat
17121103291	Female	15	2017121116:49:55	Respiratory infections
17022102348	Female	15	2017121109:32:01	Upper respiratory tract infection
17022102348	Female	15	2017121109:32:01	Heat
17121101192	Female	15	2017121109:14:56	Bacterial infection
17121101192	Female	15	2017121109:14:56	Abdominal pain
17121001842	Female	15	2017121017:05:49	Bronchitis
17121001842	Female	15	2017121017:05:49	Heat
161230137873	Female	15	2017120916:54:42	Bronchitis
17120100561	Female	15	2017120910:39:37	Abdominal pain
17120900089	Female	15	2017120904:10:12	Intestinal infection
17120803226	Female	15	2017120821:38:02	Respiratory infections
17120802874	Female	15	2017120817:24:35	Upper respiratory tract infection
17120802674	Female	15	2017120815:47:08	Upper respiratory tract infection
17120802674	Female	15	2017120815:47:08	Heat
161230058285	Female	15	2017120807:17:22	Respiratory infections
17120702959	Female	15	2017120717:11:56	Respiratory infections
161230137873	Female	15	2017120714:20:31	Bronchitis
17120603256	Female	15	2017120618:02:46	Hypokalemia
17120603256	Female	15	2017120618:02:46	Arrhythmia
17120603256	Female	15	2017120618:02:46	Chest stuffy
161230020023	Female	15	2017120617:13:56	Bacterial infection
161230020023	Female	15	2017120617:13:56	Abdominal pain
17120602099	Female	15	2017120612:00:51	Abdominal pain
17111500155	Female	15	2017120611:42:58	Edema
17120100561	Female	15	2017120608:08:08	Gastritis
17120100561	Female	15	2017120608:08:08	Abdominal pain
161230020023	Female	15	2017120517:33:53	Bacterial infection
161230020023	Female	15	2017120517:33:53	Nausea and vomiting
161230020023	Female	15	2017120517:33:53	Abdominal pain
17120501979	Female	15	2017120512:17:21	Gastritis
17120501979	Female	15	2017120512:17:21	Abdominal pain
161230145632	Female	15	2017120508:06:31	Heat
161230145632	Female	15	2017120508:06:31	Cough
17120402158	Female	15	2017120412:14:01	Abdominal pain
161230020023	Female	15	2017120403:44:31	Bacterial infection
161230020023	Female	15	2017120403:44:31	Vomiting
161230020023	Female	15	2017120403:44:31	Abdominal pain
17120302199	Female	15	2017120323:56:20	Bacterial infection
17120302199	Female	15	2017120323:56:20	Upper respiratory tract infection
17120302199	Female	15	2017120323:56:20	Heat
17120300343	Female	15	2017120307:47:18	Respiratory infections
17120300111	Female	15	2017120305:53:46	Bronchitis
17120300111	Female	15	2017120305:53:46	Cough
17120202056	Female	15	2017120214:31:16	Bacterial infection
17120202056	Female	15	2017120214:31:16	Chest pain
17102502320	Female	15	2017120210:33:40	Dizziness
17120102681	Female	15	2017120115:24:23	Nausea and vomiting
17120102461	Female	15	2017120114:28:41	Virus infection
17120102461	Female	15	2017120114:28:41	Heat
17113002876	Female	15	2017113017:54:46	Upper respiratory tract infection
17113002490	Female	15	2017113015:01:57	Heat
17112901732	Female	15	2017112911:46:39	Heat
17112703344	Female	15	2017112719:24:45	Chest pain
17112702324	Female	15	2017112713:12:09	Bacterial infection
17112702324	Female	15	2017112713:12:09	Upper respiratory tract infection
17112702324	Female	15	2017112713:12:09	Heat
17112601756	Female	15	2017112618:20:35	Respiratory infections
17112601756	Female	15	2017112618:20:35	Heat
17112002936	Female	15	2017112606:36:29	Pneumonia
17112002936	Female	15	2017112507:20:34	Pneumonia
17112402843	Female	15	2017112421:33:23	Cough
17110700630	Female	15	2017112420:51:38	Heat
17112402712	Female	15	2017112419:45:35	Cough
17112002936	Female	15	2017112407:28:56	Pneumonia
17112400017	Female	15	2017112400:59:06	Respiratory infections
17112202274	Female	15	2017112316:52:06	Heat
17112202274	Female	15	2017112316:52:06	Throat inflammation
17112203112	Female	15	2017112310:12:22	Bacterial infection
17112203112	Female	15	2017112310:12:22	Heat
17112300398	Female	15	2017112307:40:21	Heat
17112002936	Female	15	2017112307:15:52	Pneumonia
17112203112	Female	15	2017112222:11:34	Bacterial infection
17112203112	Female	15	2017112222:11:34	Heat
17112202988	Female	15	2017112220:17:36	Respiratory infections
17112202988	Female	15	2017112220:17:36	Heat
17112202533	Female	15	2017112215:33:48	Diabetes?
17112202533	Female	15	2017112215:33:48	Ketosis
17112202533	Female	15	2017112215:33:48	Abdominal pain
17112202274	Female	15	2017112214:23:22	Throat inflammation
17112202274	Female	15	2017112214:23:22	Heat
17111600127	Female	15	2017112208:27:56	Sinus rhythm is not aligned
17111600127	Female	15	2017112208:27:56	Hypertension
17112002936	Female	15	2017112206:29:09	Pneumonia
17112103150	Female	15	2017112123:40:42	Gastritis
17112103150	Female	15	2017112123:40:42	Abdominal pain
17112102961	Female	15	2017112120:25:31	Respiratory infections
17112102399	Female	15	2017112115:10:55	Chest pain
17112002936	Female	15	2017112108:55:26	Pneumonia
161230020030	Female	15	2017112019:27:20	Respiratory infections
17112003047	Female	15	2017112018:37:04	Upper respiratory tract infection
17112002936	Female	15	2017112017:05:05	Pneumonia
17112002257	Female	15	2017112013:44:23	Abdominal pain
17022303150	Female	15	2017111923:51:55	Cough
17022303150	Female	15	2017111923:51:55	Heat
17111901806	Female	15	2017111920:51:22	Respiratory infections
17010208705	Female	15	2017111913:23:08	Abdominal pain
17111901124	Female	15	2017111912:06:24	Bacterial infection
17111700977	Female	15	2017111906:23:38	Upper respiratory tract infection
17111802325	Female	15	2017111820:17:21	Upper respiratory tract infection
17111802325	Female	15	2017111820:17:21	Urinary tract infection
17111802325	Female	15	2017111820:17:21	Heat
17012601922	Female	15	2017111816:51:22	Bacterial infection
17012601922	Female	15	2017111816:51:22	Abdominal pain
17111801163	Female	15	2017111810:34:44	Respiratory infections
17111700977	Female	15	2017111807:49:41	Upper respiratory tract infection
17111702736	Female	15	2017111722:40:23	Respiratory infections
17111702584	Female	15	2017111719:39:41	Bacterial infection
17111702584	Female	15	2017111719:39:41	Upper respiratory tract infection
17111702584	Female	15	2017111719:39:41	Cough
17111300154	Female	15	2017111716:16:31	Bacterial infection
17111300154	Female	15	2017111716:16:31	Pneumonia
17111600127	Female	15	2017111710:14:13	Hypertension
17111700977	Female	15	2017111709:39:33	Upper respiratory tract infection
17111300154	Female	15	2017111615:30:17	Pneumonia
17111600127	Female	15	2017111606:43:06	Hypertension?
17111502884	Female	15	2017111520:59:21	Respiratory infections
17111300154	Female	15	2017111516:05:40	Pneumonia
17111501159	Female	15	2017111510:22:23	Dizziness
17111501159	Female	15	2017111510:22:23	Vomiting
17111300154	Female	15	2017111416:19:45	Pneumonia
17111402071	Female	15	2017111413:49:56	Respiratory infections
17060201076	Female	15	2017111319:46:15	Bacterial infection
17060201076	Female	15	2017111319:46:15	Heat
17111002683	Female	15	2017111319:41:57	Bacterial infection
17111002683	Female	15	2017111319:41:57	Pulmonary infection
17110700630	Female	15	2017111312:27:45	Heat
17111300435	Female	15	2017111307:43:48	Abdominal pain
17111300154	Female	15	2017111306:56:51	Pneumonia
17111201659	Female	15	2017111218:08:15	Heat
17111201659	Female	15	2017111218:08:15	Blood disease?
17111201659	Female	15	2017111218:08:15	Chest stuffy
17111002683	Female	15	2017111216:49:30	Pulmonary infection
17111002683	Female	15	2017111119:04:46	Bacterial infection
17111002683	Female	15	2017111119:04:46	Pulmonary infection
17111102304	Female	15	2017111117:53:14	Bacterial infection
17111102304	Female	15	2017111117:53:14	Respiratory infections
17111002683	Female	15	2017111020:54:25	Bacterial infection
17111002683	Female	15	2017111020:54:25	Asthma
17111002683	Female	15	2017111020:54:25	Pulmonary infection
17111002683	Female	15	2017111020:54:25	Upper respiratory tract infection
17110902940	Female	15	2017110919:54:43	Gastritis
17110902940	Female	15	2017110919:54:43	Abdominal pain
17101301250	Female	15	2017110907:54:18	Respiratory infections
17110802732	Female	15	2017110816:39:09	Abdominal pain
17110802815	Female	15	2017110816:37:43	High airway response
17110802815	Female	15	2017110816:37:43	Respiratory infections
17110702861	Female	15	2017110812:51:40	Pneumonia
17110801833	Female	15	2017110811:39:46	Cough
17110801833	Female	15	2017110811:39:46	Nausea and vomiting
17110801048	Female	15	2017110809:20:17	Respiratory infections
17110702861	Female	15	2017110718:45:15	Pneumonia
17110702861	Female	15	2017110718:45:15	Heat
17101802607	Female	15	2017110618:40:53	Tracheitis
17101802607	Female	15	2017110618:40:53	Cough
17110602787	Female	15	2017110615:24:25	Abdominal pain
17110501495	Female	15	2017110516:25:55	Bacterial infection
17110501495	Female	15	2017110516:25:55	Ketosis
17110501495	Female	15	2017110516:25:55	Upper respiratory tract infection
17032302334	Female	15	2017110511:18:55	Bronchial asthma take-away
17110500172	Female	15	2017110507:40:09	Respiratory infections
17110202962	Female	15	2017110220:12:06	Respiratory infections
17110202826	Female	15	2017110218:19:47	Diarrhea
17110202826	Female	15	2017110218:19:47	Abdominal pain
17033100135	Female	15	2017110106:44:56	Urinary tract infection
17033100135	Female	15	2017110106:44:56	Heat
17103102862	Female	15	2017103120:31:39	Digestive bleeding?
17102900489	Female	15	2017103118:04:36	Pneumonia
17103003175	Female	15	2017103021:22:24	Upper respiratory tract infection
17103003175	Female	15	2017103021:22:24	Heat
17102900489	Female	15	2017103017:33:46	Pneumonia
17102900489	Female	15	2017102909:03:56	Pneumonia
17091600170	Female	15	2017102817:33:33	Bacterial infection
17091600170	Female	15	2017102817:33:33	Gastritis
161230145632	Female	15	2017102817:19:00	Upper respiratory tract infection
17102801420	Female	15	2017102811:09:09	Respiratory infections
17102702720	Female	15	2017102721:05:18	Bacterial infection
17102702720	Female	15	2017102721:05:18	Respiratory infections
17102702540	Female	15	2017102718:22:38	Heat
17102702540	Female	15	2017102718:22:38	Be palpitations
17102702519	Female	15	2017102717:59:51	Mickory inflammation
17102702362	Female	15	2017102716:16:22	Bacterial infection
17102702362	Female	15	2017102716:16:22	Heat
17102700305	Female	15	2017102707:33:10	Bacterial infection
17102700305	Female	15	2017102707:33:10	Be palpitations
17102502957	Female	15	2017102522:05:08	Bacterial infection
17102502957	Female	15	2017102522:05:08	Upper respiratory tract infection
17102502957	Female	15	2017102522:05:08	Heat
17102502320	Female	15	2017102514:59:44	Dizziness
17102502320	Female	15	2017102514:59:44	Headache
17102502320	Female	15	2017102514:59:44	Upper respiratory tract infection
17102502290	Female	15	2017102514:51:55	Respiratory infections
17102300784	Female	15	2017102413:38:09	Abdominal pain
17031602531	Female	15	2017102409:56:37	Urinary infection
17102303490	Female	15	2017102323:16:38	Nausea and vomiting
17102300784	Female	15	2017102308:34:29	Abdominal pain
17031602531	Female	15	2017102308:25:38	Urinary infection
17031602531	Female	15	2017102222:43:22	Urinary infection
17102201473	Female	15	2017102217:00:14	Cough
17102201391	Female	15	2017102215:54:24	Pneumonia
17102201301	Female	15	2017102214:38:02	Respiratory infections
17102102530	Female	15	2017102121:20:57	Bacterial infection
17102102530	Female	15	2017102121:20:57	Bronchitis
17102102530	Female	15	2017102121:20:57	Heat
17101802783	Female	15	2017101823:38:02	Abdominal pain
17101802607	Female	15	2017101819:47:45	Respiratory infections
17101802485	Female	15	2017101817:19:50	Be palpitations
17101802465	Female	15	2017101816:49:31	Air
17101802436	Female	15	2017101816:29:45	Respiratory infections
17101702901	Female	15	2017101720:20:26	Abdominal pain
17101702139	Female	15	2017101713:54:27	Virus infection
17101702139	Female	15	2017101713:54:27	Heat
17101600011	Female	15	2017101706:40:55	Asthma
17101600011	Female	15	2017101600:41:02	Asthma
17101501611	Female	15	2017101519:49:24	Cough
17101402136	Female	15	2017101515:46:10	Bacterial infection
17101402527	Female	15	2017101422:34:34	Abdominal pain
17101402527	Female	15	2017101422:34:34	Vomiting
17101400548	Female	15	2017101408:16:31	Respiratory infections
17101302815	Female	15	2017101323:55:57	Respiratory infections
17101302739	Female	15	2017101321:30:59	Transient ischemic attacks?
17101302739	Female	15	2017101321:30:59	Syncope
161230032703	Female	15	2017101321:30:38	Bacterial infection
161230032703	Female	15	2017101321:30:38	Respiratory infections
161230032703	Female	15	2017101321:30:38	Cough
17091302090	Female	15	2017101320:40:17	Chest pain
17101301250	Female	15	2017101310:14:57	Respiratory infections
17101202876	Female	15	2017101217:47:06	Heat
17101100005	Female	15	2017101100:12:12	Be palpitations
161230032703	Female	15	2017101021:17:13	Cough
17101000342	Female	15	2017101008:28:11	Anemia
17100701930	Female	15	2017101006:46:20	Heat
17100701930	Female	15	2017101006:46:20	Anemia to be examined
17100902376	Female	15	2017100920:30:10	Upper respiratory tract infection
17100902376	Female	15	2017100920:30:10	Heat
17100902360	Female	15	2017100920:25:07	Foreign objects in the esophagus
17100701930	Female	15	2017100909:53:05	Anemia to be examined
17100800935	Female	15	2017100810:55:26	Pneumonia
17100702147	Female	15	2017100722:03:57	Respiratory infections
17100701930	Female	15	2017100716:53:29	Anemia to be examined
161230020023	Female	15	2017100711:35:10	Abdominal pain
17100700006	Female	15	2017100700:30:41	Diabetes
17100500959	Female	15	2017100508:58:07	Lumbar pain
17100500022	Female	15	2017100502:18:42	Be palpitations
17032302334	Female	15	2017100311:21:24	Bronchial asthma
17100300600	Female	15	2017100309:22:27	Respiratory infections
17100100762	Female	15	2017100115:11:33	Pericarditis
17092902134	Female	15	2017093008:22:28	Bacterial infection
17092902134	Female	15	2017093008:22:28	Heat
17092902134	Female	15	2017093008:22:28	Headache
17092802663	Female	15	2017092822:19:32	Bronchitis
17092802462	Female	15	2017092818:36:27	Heat
17092802396	Female	15	2017092816:58:43	Respiratory infections
17092800630	Female	15	2017092808:24:07	Bacterial infection
17092800630	Female	15	2017092808:24:07	Abdominal pain
17092400074	Female	15	2017092708:04:44	Bacterial infection
17092400074	Female	15	2017092708:04:44	Heat
17092400074	Female	15	2017092606:59:28	Bacterial infection
17092400074	Female	15	2017092606:59:28	Heat
17092400074	Female	15	2017092506:11:56	Bacterial infection
17092400074	Female	15	2017092506:11:56	Heat
17092401295	Female	15	2017092413:00:17	Bacterial infection
17092401295	Female	15	2017092413:00:17	Bronchitis
17092401295	Female	15	2017092413:00:17	Respiratory infections
17092400074	Female	15	2017092405:46:23	Bacterial infection
17092400074	Female	15	2017092405:46:23	Heat
17092302690	Female	15	2017092322:07:17	Upper respiratory tract infection
17092301480	Female	15	2017092310:47:50	Respiratory infections
17092300962	Female	15	2017092309:14:15	Virus infection
17092300962	Female	15	2017092309:14:15	Heat
17092202801	Female	15	2017092222:43:56	Bronchitis
17092201788	Female	15	2017092212:50:12	Anemia
17092201788	Female	15	2017092212:50:12	Respiratory alkaline poisoning
17092201788	Female	15	2017092212:50:12	Gastritis
17092201788	Female	15	2017092212:50:12	Digestive bleeding
17092201385	Female	15	2017092210:32:39	Lackluster
17092201385	Female	15	2017092210:32:39	Nacpoor
17092201175	Female	15	2017092209:49:57	Chest stuffy
17092103037	Female	15	2017092122:47:16	Bronchitis
17092103037	Female	15	2017092122:47:16	Respiratory infections
17092102447	Female	15	2017092115:07:40	Hypertension
17092001944	Female	15	2017092013:14:13	Hypertension
17091903133	Female	15	2017091922:25:29	Bacterial infection
17091903133	Female	15	2017091922:25:29	Heat
17091803209	Female	15	2017091819:33:55	Abdominal pain
17091803201	Female	15	2017091819:22:08	Medical examination
17091802128	Female	15	2017091812:20:46	Respiratory alkaline poisoning
17091801820	Female	15	2017091810:58:28	Heat
17091701846	Female	15	2017091721:42:35	Gastritis
17091701846	Female	15	2017091721:42:35	Diarrhea
17091701277	Female	15	2017091713:30:49	Chest pain
17091602392	Female	15	2017091617:22:20	Intestinal infection
17091602392	Female	15	2017091617:22:20	Virus infection
17091602392	Female	15	2017091617:22:20	Abdominal pain
17091602059	Female	15	2017091614:51:51	Abdominal pain
17081501774	Female	15	2017091614:07:09	Upper respiratory tract infection
17091502815	Female	15	2017091523:31:26	Foreign objects in the esophagus
17091500201	Female	15	2017091507:11:53	Heat
17091302605	Female	15	2017091316:15:43	Allergic rhinitis
17091302571	Female	15	2017091316:04:26	Respiratory infections
17091301898	Female	15	2017091312:57:10	Be palpitations
17091200066	Female	15	2017091206:23:29	Respiratory infections
17091102447	Female	15	2017091114:14:31	Abdominal pain
17091001926	Female	15	2017091022:38:38	Heart failure
17091001926	Female	15	2017091022:38:38	Pulmonary hypertension
17090902471	Female	15	2017090919:49:48	Respiratory infections
161230020023	Female	15	2017090912:40:37	Chest pain
17090700660	Female	15	2017090808:31:08	Low heat
17090800437	Female	15	2017090807:41:31	Anemia
17090800437	Female	15	2017090807:41:31	Lower abdominal pain
17090800025	Female	15	2017090801:22:24	Urinary infection
17090702641	Female	15	2017090718:15:51	Respiratory infections
17090702514	Female	15	2017090716:25:10	Vomiting
17090702442	Female	15	2017090715:54:24	Abdominal pain
17090700735	Female	15	2017090708:33:22	Abdominal pain to be examined
17090602912	Female	15	2017090620:54:00	Upper respiratory tract infection
161230020023	Female	15	2017090619:06:05	Asthma
17090601253	Female	15	2017090618:01:44	Pneumothorax
17090601253	Female	15	2017090618:01:44	Chest pain
17090601929	Female	15	2017090613:15:46	Respiratory infections
17090601903	Female	15	2017090613:08:28	Gastritis
17090601903	Female	15	2017090613:08:28	Abdominal pain
161230020023	Female	15	2017090420:37:40	Respiratory infections
17090402460	Female	15	2017090414:33:58	Bacterial infection
17090402460	Female	15	2017090414:33:58	Respiratory infections
17090401124	Female	15	2017090409:20:01	Arrhythmia
17090401124	Female	15	2017090409:20:01	Heart failure
17090401124	Female	15	2017090409:20:01	Atrial tumor?
17090400003	Female	15	2017090400:15:33	Thrombocytopenia
17090400003	Female	15	2017090400:15:33	Dizziness
17090400003	Female	15	2017090400:15:33	Lackluster
17090300867	Female	15	2017090310:13:35	Cough
17090201851	Female	15	2017090213:44:19	Respiratory infections
17032302334	Female	15	2017090110:57:47	Bronchial asthma
17083102611	Female	15	2017083118:04:09	Gastritis
17083102611	Female	15	2017083118:04:09	Abdominal pain
17083002608	Female	15	2017083019:12:49	Rat drug poisoning
17082902423	Female	15	2017082916:51:56	Bronchitis
17082802614	Female	15	2017082818:06:27	Mickory inflammation
17082602410	Female	15	2017082622:47:22	Upper respiratory tract infection
17082602230	Female	15	2017082618:37:54	Respiratory infections
17082500092	Female	15	2017082506:33:12	Heat
17082401393	Female	15	2017082410:05:59	Diarrhea
17082401393	Female	15	2017082410:05:59	Syncope
17082103232	Female	15	2017082121:22:17	Respiratory infections
17082103232	Female	15	2017082121:22:17	Chest pain
17082100020	Female	15	2017082101:10:05	Be palpitations
17082001242	Female	15	2017082015:03:37	Lymph node inflammation?
17081802614	Female	15	2017081820:00:36	Upper respiratory tract infection
17081800036	Female	15	2017081803:53:42	Diabetes
17081800036	Female	15	2017081803:53:42	Abdominal pain
17081501615	Female	15	2017081615:08:22	Sepsis
17081501615	Female	15	2017081615:08:22	Bacterial infection
17081501615	Female	15	2017081615:08:22	Gastritis
17081501615	Female	15	2017081615:08:22	Intestinal obstruction
17081501615	Female	15	2017081615:08:22	Abdominal pain
17081501615	Female	15	2017081615:08:22	Diarrhea
17081600012	Female	15	2017081600:22:28	Diarrhea
17081600012	Female	15	2017081600:22:28	Vomiting
17081600012	Female	15	2017081600:22:28	Abdominal pain
17081501615	Female	15	2017081511:03:14	Bacterial infection
17081501615	Female	15	2017081511:03:14	Abdominal pain
17081401043	Female	15	2017081408:51:17	Bacterial infection
17081401043	Female	15	2017081408:51:17	Upper respiratory tract infection
17081301236	Female	15	2017081315:26:23	Upper respiratory tract infection
17081300910	Female	15	2017081310:46:17	Gastritis
17081002197	Female	15	2017081014:38:10	Abdominal pain
17080802767	Female	15	2017080823:33:42	Bacterial infection
17080802767	Female	15	2017080823:33:42	Abdominal pain
17080802767	Female	15	2017080823:33:42	Diarrhea
17080702950	Female	15	2017080721:34:15	Upper respiratory tract infection
17080702950	Female	15	2017080721:34:15	Heat
161230092735	Female	15	2017080720:01:54	Abdominal pain
17080302260	Female	15	2017080315:15:22	Be palpitations
161230020023	Female	15	2017080109:13:52	Chest pain
161230020023	Female	15	2017080109:13:52	Abdominal pain
17072902293	Female	15	2017073123:52:37	Diarrhea
17073103187	Female	15	2017073121:00:49	Digestive bleeding
17073001157	Female	15	2017073109:54:04	Infectious fever
17072902293	Female	15	2017073104:46:10	Diarrhea
17073001157	Female	15	2017073014:17:07	Infectious fever
17073000064	Female	15	2017073005:38:53	Infectious fever
17073000064	Female	15	2017073005:38:53	Heat
17072902293	Female	15	2017072923:45:49	Diarrhea
17072800146	Female	15	2017072815:11:52	Abdominal pain
17072702581	Female	15	2017072809:02:37	Be palpitations
17072800146	Female	15	2017072806:59:54	Diarrhea
17072702581	Female	15	2017072717:50:09	Be palpitations
16123182869	Female	15	2017072508:56:32	Abdominal pain
17072402724	Female	15	2017072415:59:47	Diarrhea
17072402724	Female	15	2017072415:59:47	Heat
17032302334	Female	15	2017072211:03:05	Upper respiratory tract infection
17072100050	Female	15	2017072104:22:12	Acute gastritis
17072001798	Female	15	2017072013:09:33	Abdominal pain
17072001208	Female	15	2017072009:46:58	Diarrhea
17072000262	Female	15	2017072007:16:09	Chest stuffy
17071702824	Female	15	2017071719:36:51	Heat
161230020023	Female	15	2017071718:53:29	Abdominal pain
17071601326	Female	15	2017071617:31:51	Upper respiratory tract infection
17071402320	Female	15	2017071421:20:17	Respiratory infections
17071302503	Female	15	2017071322:09:13	Mickory inflammation
17071200029	Female	15	2017071202:09:30	Infectious fever
17071200003	Female	15	2017071200:06:12	Abdominal pain
17071102443	Female	15	2017071119:32:57	Abdominal pain
17071000033	Female	15	2017071002:50:51	Upper respiratory tract infection
17070900869	Female	15	2017070910:41:04	Bronchitis
17070801644	Female	15	2017070813:29:07	Heat
17070801581	Female	15	2017070812:46:54	Syncope
17070701491	Female	15	2017070711:26:30	Intestinal infection
17070600111	Female	15	2017070606:59:17	Intestinal infection
17070600006	Female	15	2017070600:41:14	Diarrhea
17070500034	Female	15	2017070502:26:12	Ketosis
17070500034	Female	15	2017070502:26:12	Vomiting
17070201412	Female	15	2017070220:02:22	Abdominal pain
17070201376	Female	15	2017070219:09:17	Be palpitations
17070200714	Female	15	2017070209:53:26	Respiratory infections
17063002437	Female	15	2017063023:07:49	Mickory inflammation
17063002437	Female	15	2017063023:07:49	Heat
17032302334	Female	15	2017062910:57:09	Upper respiratory tract infection
17062800038	Female	15	2017062803:06:58	Abdominal pain
17010266055	Female	15	2017062713:38:38	Bacterial infection
17010266055	Female	15	2017062713:38:38	Abdominal pain
17062700020	Female	15	2017062702:06:09	Gastritis
17062700020	Female	15	2017062702:06:09	Abdominal pain
17062601716	Female	15	2017062611:04:17	Upper limb jitter
17061800247	Female	15	2017062512:28:07	Respiratory infections
17062401930	Female	15	2017062416:37:14	Syncope
17062400060	Female	15	2017062405:12:21	Stomach pain
17062301364	Female	15	2017062313:11:29	Hives
17062301364	Female	15	2017062313:11:29	Abdominal pain
17062301364	Female	15	2017062313:11:29	Air
17062101558	Female	15	2017062111:06:40	Air
17061801468	Female	15	2017061909:44:25	Hives
17061801468	Female	15	2017061909:44:25	Connective tissue disease
17061801468	Female	15	2017061909:44:25	Air
17061801468	Female	15	2017061909:44:25	Vomiting
17061801468	Female	15	2017061820:11:26	Hives
17061801468	Female	15	2017061820:11:26	Vomiting
17061801468	Female	15	2017061820:11:26	Air
161231103864	Female	15	2017061814:00:53	Respiratory infections
17061800247	Female	15	2017061807:41:01	Respiratory infections
161231103864	Female	15	2017061614:12:04	Respiratory infections
17061502689	Female	15	2017061520:47:05	Upper respiratory tract infection
17061502455	Female	15	2017061516:25:20	Diabetic ketoacidosis
17061502455	Female	15	2017061516:25:20	Diabetes
17061502455	Female	15	2017061516:25:20	Appendicitis
17061502455	Female	15	2017061516:25:20	Abdominal pain
17061502455	Female	15	2017061516:25:20	Nausea and vomiting
17061501934	Female	15	2017061513:23:51	Proteinuria
17061402170	Female	15	2017061414:48:16	Bacterial infection
17061402170	Female	15	2017061414:48:16	Virus infection
17061402170	Female	15	2017061414:48:16	Purulent pachylitis
17061300130	Female	15	2017061307:02:03	Cough
17061002273	Female	15	2017061023:08:28	Chest pain
17060802807	Female	15	2017060820:22:31	Bacterial infection
17060802807	Female	15	2017060820:22:31	Chest pain
17060702779	Female	15	2017060719:10:53	Haematuria
17060501617	Female	15	2017060510:15:28	Diarrhea
17060401133	Female	15	2017060411:46:00	Infectious fever
17060302328	Female	15	2017060320:06:45	Respiratory infections
17060301952	Female	15	2017060314:58:41	Gastritis
17052801053	Female	15	2017060311:25:47	Pulmonary infection
17052801053	Female	15	2017060210:18:00	Pulmonary infection
17060200581	Female	15	2017060208:03:15	Lymph node enlargement
17060102871	Female	15	2017060120:34:20	Respiratory infections
17060101613	Female	15	2017060110:42:22	Chest stuffy
17052801053	Female	15	2017060110:19:25	Pulmonary infection
17053103008	Female	15	2017053121:17:17	Dizziness
17053103008	Female	15	2017053121:17:17	Vomiting
17053102917	Female	15	2017053119:41:39	Respiratory infections
17052801053	Female	15	2017053111:29:52	Pulmonary infection
17053001393	Female	15	2017053019:23:58	Diarrhea
17053001393	Female	15	2017053019:23:58	Abdominal pain
17053001258	Female	15	2017053016:17:41	Chest stuffy
17053001136	Female	15	2017053014:17:07	Asthma
17052801053	Female	15	2017053013:05:49	Pulmonary infection
17052801053	Female	15	2017052912:36:37	Pulmonary infection
[truncated: 308,759+ more rows]
