# Supplementary material for: Dynamic changes of emergency visits: a retrospective observational study
Source: BMC Emerg Med. 2022 Jun 11;22:105. doi: 10.1186/s12873-022-00654-0 (PMC9187931; doi:10.1186/s12873-022-00654-0)
Supplement: Supplementary file 2 — Additional file 2. [file 12873_2022_654_MOESM2_ESM.xlsx]

## Sheet: Sheet1
Medical Record No.	Gender	Age	Date of Admission	Principal Diagnosis
18072002282	Male	0	2018072021:16:18	Diabetes
18072002282	Male	0	2018072021:16:18	Hypokalemia
18072002282	Male	0	2018072021:16:18	Hyposodium haematosis
18091002193	Male	0	2018091014:28:19	Respiratory infections
18112102322	Male	0	2018112115:29:54	Vague awareness
18112102322	Male	0	2018112115:31:17	Alcohol poisoning?
18021201831	Male	1	2018050210:39:04	Upper respiratory tract infection
18010501740	Male	1	2018060218:16:52	Infectious fever
18100700679	Male	1	2018123017:25:45	Upper respiratory tract infection
17121302052	Male	2	2018031807:56:38	Bronchitis
17011403030	Female	2	2018100415:03:54	Respiratory infections
18110601606	Male	3	2018110611:41:55	Respiratory infections
18110601606	Male	3	2018110611:41:55	Heat
18081302474	Female	3	2018081314:49:25	Gastritis
18081302474	Female	3	2018081314:49:25	Abdominal pain
17110400929	Male	4	2018010317:34:49	Upper respiratory tract infection
17110400929	Male	4	2018021912:43:20	Bronchitis
17110400929	Male	4	2018022012:19:44	Bronchitis
17110400929	Male	4	2018122513:19:03	Bronchitis
18122701564	Male	4	2018122712:34:57	Pulmonary infection
17080101625	Female	4	2018093005:30:17	Upper respiratory tract infection remove
17080101625	Female	4	2018120707:18:59	Upper respiratory tract infection remove
18022402668	Male	6	2018022423:14:07	Carbon monoxide toxicity effects
18041400541	Male	6	2018041408:18:14	Pneumocoplasma pneumonia
18041400541	Male	6	2018041408:18:14	Upper respiratory tract infection
18041400541	Male	6	2018041408:18:14	Pneumonia
18062302244	Male	7	2018062319:53:30	Lymphocytic leukemia examination
17060102791	Male	8	2018011311:06:25	Pharyngeitis
17060102791	Male	8	2018032918:19:25	Upper respiratory disease
17060102791	Male	8	2018032918:19:25	Pharyngeitis
18071901774	Male	8	2018071913:22:33	Thrombocytopenic purpura
18062400219	Male	8	2018081523:33:30	Hypertensive encephalopathy
18112501731	Male	8	2018112518:05:17	Heat
18112501731	Male	8	2018112518:05:17	Respiratory infections
17060102791	Male	8	2018121816:21:37	Upper respiratory tract infection
17010500283	Female	8	2018020814:43:17	Upper respiratory tract infection
18040101473	Female	8	2018040116:00:46	Coronary heart disease
18040101473	Female	8	2018040116:00:46	Be palpitations
18111501644	Male	9	2018111513:05:37	Bacterial pneumonia
18111501644	Male	9	2018111513:05:37	Bronchitis
18060702582	Female	9	2018060718:26:27	Dizziness
18111702342	Male	10	2018120509:20:49	Upper respiratory tract infection
18092101703	Female	11	2018092114:38:52	Upper respiratory tract infection
18052400829	Male	12	2018052408:55:17	Upper respiratory tract infection
18060102549	Male	13	2018060121:37:15	Hives
18101701683	Male	13	2018101713:01:56	Upper respiratory tract infection
18122502351	Male	13	2018122516:16:26	Bacterial infection
18122502351	Male	13	2018122516:16:26	Respiratory infections
18050303336	Female	13	2018051705:37:03	Upper respiratory tract infection
18050303336	Female	13	2018051705:37:03	Heat
18010802883	Male	14	2018010819:15:17	Cough
18010802883	Male	14	2018010819:15:17	Heat
18011502836	Male	14	2018011520:20:12	Respiratory infections
18012101378	Male	14	2018012117:40:25	Respiratory infections
18012101378	Male	14	2018012117:40:25	Heat
18012101529	Male	14	2018012120:26:45	Bacterial infection
18012101529	Male	14	2018012120:26:45	Upper abdominal pain
18012202585	Male	14	2018012220:09:19	Abdominal pain
18012202585	Male	14	2018012313:19:18	Bacterial infection
18012202585	Male	14	2018012313:19:18	Abdominal pain
18012202585	Male	14	2018012409:38:24	Bacterial infection
18012202585	Male	14	2018012409:38:24	Abdominal pain
18012202585	Male	14	2018012509:25:21	Bacterial infection
18012202585	Male	14	2018012509:25:21	Abdominal pain
18021301684	Male	14	2018021320:53:18	Respiratory infections
18021700104	Male	14	2018021707:51:42	Tracheitis
18022302304	Male	14	2018022314:04:36	Lackluster
17020101427	Male	14	2018022806:18:10	Headache
17020101427	Male	14	2018022806:18:10	Anemia of regeneration disorder
17042700019	Male	14	2018022822:54:19	Respiratory infections
18031900611	Male	14	2018031908:24:41	Upper respiratory tract infection
18040702160	Male	14	2018040719:04:09	Abdominal pain
18040702160	Male	14	2018040719:04:09	Purpura
18041001544	Male	14	2018041015:32:16	Respiratory infections
18041103241	Male	14	2018041123:42:18	Cough
18041103241	Male	14	2018041123:42:18	Respiratory infections
18041603057	Male	14	2018041619:01:27	Gastritis
18041603057	Male	14	2018041619:01:27	Heat
18041603271	Male	14	2018041621:19:48	Vomiting
18042602395	Male	14	2018042616:13:24	Respiratory infections
161230008043	Male	14	2018051703:44:44	Gastritis
161230008043	Male	14	2018051703:44:44	Abdominal pain
17091000541	Male	14	2018051816:51:27	Respiratory infections
18052101090	Male	14	2018052109:41:50	Chest stuffy
18052701641	Male	14	2018052716:56:39	Hypertension
18060102620	Male	14	2018060122:08:53	Cough
18060702319	Male	14	2018060715:44:17	Anemia
17082400036	Male	14	2018060723:07:55	Tracheitis
17082400036	Male	14	2018060723:07:55	Heat
18060702319	Male	14	2018060807:35:52	Anemia
18061001263	Male	14	2018061013:31:31	Abdominal pain
18061103038	Male	14	2018061120:32:54	Allergic purpura
18061103038	Male	14	2018061120:32:54	Heat
18061202835	Male	14	2018061219:57:22	Lymph node enlargement
18061302578	Male	14	2018061320:46:57	Bronchitis
17042700019	Male	14	2018061721:14:04	Bronchitis
17042700019	Male	14	2018061721:14:04	Cough
18061701585	Male	14	2018061721:29:22	Bronchitis
17091402835	Male	14	2018061802:29:10	Respiratory infections
17091402835	Male	14	2018061802:29:10	Chest pain
18032302473	Male	14	2018061817:28:28	Bacterial infection
18032302473	Male	14	2018061817:28:28	Respiratory infections
18062602500	Male	14	2018062620:00:04	Bacterial infection
18062602500	Male	14	2018062620:00:04	Respiratory infections
17063001993	Male	14	2018062714:22:56	Respiratory infections
18070101061	Male	14	2018070111:03:55	Chest pain
161231103984	Male	14	2018070113:04:55	Be palpitations
18070203077	Male	14	2018070219:09:58	Respiratory infections
18070203077	Male	14	2018070219:09:58	Heat
18070203077	Male	14	2018070314:20:00	Respiratory infections
18070203077	Male	14	2018070314:20:00	Heat
18070203077	Male	14	2018070413:05:55	Respiratory infections
18070203077	Male	14	2018070413:05:55	Heat
18070502701	Male	14	2018070520:41:41	Pulmonary infection
18070502701	Male	14	2018070520:41:41	Respiratory infections
18071300724	Male	14	2018071507:53:15	Cough
18071902535	Male	14	2018071920:24:22	Heat
18071902535	Male	14	2018072008:06:34	Heat
17121800580	Male	14	2018072015:42:20	Respiratory infections
17121800580	Male	14	2018072015:42:20	Heat
18071902535	Male	14	2018072110:02:10	Infectious fever
17121800580	Male	14	2018072119:42:07	Respiratory infections
17121800580	Male	14	2018072119:42:07	Heat
18072201938	Male	14	2018072222:41:27	Bacterial infection
18072201938	Male	14	2018072222:41:27	Gastritis
18072201938	Male	14	2018072222:41:27	Diarrhea
17121800580	Male	14	2018072308:55:18	Respiratory infections
17121800580	Male	14	2018072308:55:18	Heat
18072901920	Male	14	2018072920:49:33	Lumbar pain
18073002390	Male	14	2018073016:55:05	Heat stress?
18073002390	Male	14	2018073016:55:05	Bacterial infection
17020800507	Male	14	2018080105:35:22	Bacterial infection
17020800507	Male	14	2018080105:35:22	Gastritis
17020800507	Male	14	2018080105:35:22	Diarrhea
17020800507	Male	14	2018080105:35:22	Vomiting
18080300030	Male	14	2018080302:27:53	Bacterial infection
18080300030	Male	14	2018080302:27:53	Respiratory infections
18080300784	Male	14	2018080308:54:25	Pain
18080300030	Male	14	2018080409:21:14	Bacterial infection
18080300030	Male	14	2018080409:21:14	Respiratory infections
18080300030	Male	14	2018080509:15:04	Bacterial infection
18080300030	Male	14	2018080509:15:04	Respiratory infections
18080702352	Male	14	2018080719:48:10	Respiratory infections
18080702352	Male	14	2018080719:48:10	Chest pain
18082502551	Male	14	2018082523:30:00	Disgusting
18082600166	Male	14	2018082607:13:01	Respiratory infections
18082600166	Male	14	2018082607:13:01	Heat
161231102351	Male	14	2018082621:58:17	Bacterial infection
161231102351	Male	14	2018082621:58:17	Heat
161231102351	Male	14	2018082713:22:19	Heat
161231102351	Male	14	2018082713:22:19	Bacterial infection
161231102351	Male	14	2018082809:04:41	Bacterial infection
161231102351	Male	14	2018082809:04:41	Respiratory infections
161231102351	Male	14	2018082809:04:41	Heat
161231102351	Male	14	2018082907:41:24	Pneumonia
161231102351	Male	14	2018083006:50:19	Pneumonia
161231102351	Male	14	2018083106:53:13	Pneumonia
161231102351	Male	14	2018090106:45:04	Pneumonia
161231102351	Male	14	2018090206:47:38	Pneumonia
161231102351	Male	14	2018090304:21:33	Pneumonia
18090301963	Male	14	2018090312:51:21	Headache
161231102351	Male	14	2018090407:12:16	Respiratory infections
161231102351	Male	14	2018090407:12:16	Pneumonia
18042800677	Male	14	2018090418:15:56	Upper respiratory tract infection
18090402781	Male	14	2018090419:56:11	Bronchitis
18090402781	Male	14	2018090419:56:11	Cough
161231102351	Male	14	2018090504:22:17	Bacterial infection
161231102351	Male	14	2018090504:22:17	Pneumonia
17091801440	Male	14	2018090709:14:09	Mickory inflammation
161231102351	Male	14	2018091116:50:03	Respiratory infections
161230071649	Male	14	2018091717:11:49	Bacterial infection
161230071649	Male	14	2018091717:11:49	Dizziness
161230071649	Male	14	2018091717:11:49	Vomiting
161230071649	Male	14	2018091817:05:26	Bacterial infection
161230071649	Male	14	2018091817:05:26	Gastritis
161230071649	Male	14	2018091817:05:26	Vomiting
161231102351	Male	14	2018092116:46:02	Pneumonia
18092301327	Male	14	2018092315:58:39	Allergic rhinitis [allergic rhinitis]
18092301327	Male	14	2018092315:58:39	Respiratory infections
18092500042	Male	14	2018092504:34:10	Chest pain
18092501562	Male	14	2018092511:46:54	Bronchitis
18092501562	Male	14	2018092511:46:54	Infectious fever
18092901466	Male	14	2018092913:31:21	Abdominal pain
18100200568	Male	14	2018100210:29:32	Dizziness
17091801440	Male	14	2018100710:56:15	Respiratory infections
18100800411	Male	14	2018100807:50:34	Abdominal pain
17091801440	Male	14	2018100812:00:32	Mickory inflammation
17091801440	Male	14	2018100910:50:06	Mickory inflammation
17091801440	Male	14	2018100910:50:06	Bronchitis
18100902792	Male	14	2018100921:15:21	Bacterial infection
18100902792	Male	14	2018100921:15:21	Gastritis
18100902792	Male	14	2018100921:15:21	Abdominal pain
17091801440	Male	14	2018101014:21:38	Bronchitis
17091801440	Male	14	2018101109:21:24	Bronchitis
17091801440	Male	14	2018101208:30:59	Bronchitis
17091801440	Male	14	2018101310:22:59	Bronchitis
18070402334	Male	14	2018101316:27:18	Tracheitis
18070402334	Male	14	2018101316:27:18	Pneumonia
18101401794	Male	14	2018101418:26:33	Hypertension
18101401794	Male	14	2018101418:26:33	Dizziness
18101500485	Male	14	2018101507:56:36	Pneumonia
18101500485	Male	14	2018101507:56:36	Heat
17092302377	Male	14	2018101508:22:06	Vertigo
17091801440	Male	14	2018101511:59:07	Bronchitis
161231102351	Male	14	2018102013:32:05	Respiratory infections
18102302378	Male	14	2018102316:12:40	Lymph node enlargement?
18090600749	Male	14	2018102914:27:43	Hypertension
18102302378	Male	14	2018102918:34:20	Respiratory infections
18102302378	Male	14	2018102918:34:20	Heat
18102902742	Male	14	2018103019:49:12	Gastritis
18102902742	Male	14	2018103019:49:12	Abdominal pain to be examined
18102902742	Male	14	2018103019:49:12	Heat
18102902742	Male	14	2018103108:40:17	Gastritis
18102902742	Male	14	2018103108:40:17	Abdominal pain to be examined
18102902742	Male	14	2018103108:40:17	Heat
18103101757	Male	14	2018103112:53:49	Bacterial infection
18103101757	Male	14	2018103112:53:49	Infectious fever
18103101856	Male	14	2018103113:32:57	Respiratory infections
18110100025	Male	14	2018110101:56:04	Abdominal pain
18102902742	Male	14	2018110108:52:57	Heat
18102902742	Male	14	2018110108:52:57	Heat
17031900246	Male	14	2018110119:05:29	Chest pain
18110201477	Male	14	2018110211:13:46	Be palpitations
18110201749	Male	14	2018110213:04:42	Vomiting
17030102584	Male	14	2018110302:04:42	Bacterial infection
17030102584	Male	14	2018110302:04:42	Nausea and vomiting
18110400521	Male	14	2018110408:31:41	Respiratory infections
18053001706	Male	14	2018110411:34:50	Bacterial infection
18053001706	Male	14	2018110411:34:50	Gastritis
18053001706	Male	14	2018110411:34:50	Abdominal pain
18110800950	Male	14	2018110809:41:19	Bacterial infection
18110800950	Male	14	2018110809:41:19	Respiratory infections
18110901674	Male	14	2018110912:35:12	Bacterial infection
18110901674	Male	14	2018110912:35:12	Tracheitis
18110901674	Male	14	2018110912:35:12	Heat
18111002189	Male	14	2018111016:53:31	Nausea and vomiting
18081201436	Male	14	2018111019:58:40	Lackluster
161231102351	Male	14	2018111020:24:40	Respiratory infections
18111302163	Male	14	2018111314:49:42	Bacterial infection
18111302163	Male	14	2018111314:49:42	Abdominal pain
18111600032	Male	14	2018111603:27:35	Respiratory infections
18111600032	Male	14	2018111603:27:35	Sepsis
18111601749	Male	14	2018111613:55:23	Chest pain
18111602636	Male	14	2018111622:37:16	Bacterial infection
18111602636	Male	14	2018111622:37:16	Gastritis
18111602636	Male	14	2018111622:37:16	Diarrhea
18111602636	Male	14	2018111622:37:16	Stomach pain
18111602636	Male	14	2018111622:37:16	Stomach pain
18111600032	Male	14	2018111708:05:33	Respiratory infections
18111600032	Male	14	2018111708:05:33	Sepsis
18111600032	Male	14	2018111810:21:46	Sepsis
18111600032	Male	14	2018111810:21:46	Respiratory infections
18111801586	Male	14	2018111816:50:05	Respiratory infections
17010213469	Male	14	2018111823:56:48	Bronchitis
17010213469	Male	14	2018111823:56:48	Cough
17010213469	Male	14	2018112020:27:25	Bronchitis
17010213469	Male	14	2018112020:27:25	Cough
18112202576	Male	14	2018112219:43:41	Abdominal pain
18112902445	Male	14	2018112917:27:09	Bacterial infection
18112902445	Male	14	2018112917:27:09	Gastritis
18112902445	Male	14	2018112917:27:09	Abdominal pain
18112902445	Male	14	2018112917:27:09	Chest stuffy
18113002591	Male	14	2018113021:38:48	Bronchitis
18113002591	Male	14	2018113021:38:48	Infectious fever
18113002661	Male	14	2018113022:58:06	Respiratory infections
18113002661	Male	14	2018113022:58:06	Drug poisoning
18120102446	Male	14	2018120117:26:44	Bronchitis
18120200330	Male	14	2018120208:36:52	Heat
18120200720	Male	14	2018120209:39:39	Bacterial infection
18120200720	Male	14	2018120209:39:39	Infectious fever
18113000327	Male	14	2018120308:09:06	Heat
18120402340	Male	14	2018120417:13:04	Bacterial infection
18120402340	Male	14	2018120417:13:04	Vomiting
18120200720	Male	14	2018120511:33:04	Bacterial infection
18120501350	Male	14	2018120511:40:33	Heat
18120402340	Male	14	2018120512:28:20	Gastritis
18120402340	Male	14	2018120512:28:20	Abdominal pain
18120402340	Male	14	2018120512:28:20	Bacterial infection
18120801882	Male	14	2018120815:59:39	Heat
18121003078	Male	14	2018121023:36:11	Bacterial infection
18121003078	Male	14	2018121023:36:11	Diabetic ketosis
18121003078	Male	14	2018121023:36:11	Diabetes
18121003078	Male	14	2018121023:36:11	Gastritis
18121003078	Male	14	2018121023:36:11	Abdominal pain
18121101753	Male	14	2018121113:39:45	Respiratory infections
18121101753	Male	14	2018121113:39:45	Heat
18121202278	Male	14	2018121216:54:00	Respiratory infections
18111902641	Male	14	2018121319:53:00	Respiratory infections
18111902641	Male	14	2018121319:53:00	Heat
161231102351	Male	14	2018121422:09:23	Respiratory infections
18121500268	Male	14	2018121507:25:12	Duodenal ulcer
18121500268	Male	14	2018121507:25:12	Digestive bleeding
18121501981	Male	14	2018121515:24:09	Be palpitations
18121200064	Male	14	2018121609:03:33	Hypertension
18121600805	Male	14	2018121610:03:55	Pneumonia
18121601717	Male	14	2018121617:05:09	Bacterial infection
18121601717	Male	14	2018121617:05:09	Respiratory infections
18121601717	Male	14	2018121617:05:09	Heat
18121601717	Male	14	2018121708:58:17	Respiratory infections
18121601717	Male	14	2018121708:58:17	Heat
18121600805	Male	14	2018121710:20:01	Pneumonia
18121701846	Male	14	2018121712:27:54	Respiratory infections
18121702941	Male	14	2018121723:41:33	Respiratory infections
18121800018	Male	14	2018121800:38:40	Heat
18121800018	Male	14	2018121800:38:40	Abdominal pain
18121600805	Male	14	2018121807:55:32	Pneumonia
18121601717	Male	14	2018121808:46:42	Respiratory infections
18121601717	Male	14	2018121808:46:42	Heat
18032302473	Male	14	2018121816:43:58	Bacterial infection
18032302473	Male	14	2018121816:43:58	Vomiting
18032302473	Male	14	2018121816:43:58	Heat
18121802714	Male	14	2018121819:07:00	Heat
18121600805	Male	14	2018121907:55:45	Pneumonia
18121600805	Male	14	2018122008:55:27	Pneumonia
18121600805	Male	14	2018122109:45:30	Intestinal bacterial group disorders
18121600805	Male	14	2018122109:45:30	Pneumonia
18122102660	Male	14	2018122120:49:52	Asthma bronchitis
18121600805	Male	14	2018122208:22:45	Intestinal bacterial group disorders
18121600805	Male	14	2018122208:22:45	Pneumonia
18120801882	Male	14	2018122209:03:55	Respiratory infections
18120801882	Male	14	2018122209:03:55	Infectious fever
18121600805	Male	14	2018122309:41:42	Intestinal bacterial group disorders
18121600805	Male	14	2018122309:41:42	Pneumonia
18120801882	Male	14	2018122313:37:43	Infectious fever
18120801882	Male	14	2018122313:37:43	Respiratory infections
18121600805	Male	14	2018122409:21:11	Intestinal bacterial group disorders
18121600805	Male	14	2018122409:21:11	Pneumonia
18121600805	Male	14	2018122509:39:34	Intestinal bacterial group disorders
18121600805	Male	14	2018122509:39:34	Pneumonia
18122502439	Male	14	2018122516:56:23	Chest pain
18121600805	Male	14	2018122608:53:41	Intestinal bacterial group disorders
18121600805	Male	14	2018122608:53:41	Pneumonia
18122602344	Male	14	2018122615:38:11	Bacterial infection
18122602344	Male	14	2018122615:38:11	Respiratory infections
18122602344	Male	14	2018122615:38:11	Heat
17061200202	Male	14	2018122806:12:26	Respiratory infections
17061200202	Male	14	2018122806:12:26	Heat
18122801646	Male	14	2018122813:21:02	Upper respiratory tract infection
18071300961	Male	14	2018122918:50:46	Cough
18071300961	Male	14	2018122918:50:46	Respiratory infections
18123100714	Male	14	2018123115:02:13	Bronchitis
18123102593	Male	14	2018123123:07:30	Respiratory infections
18123102593	Male	14	2018123123:07:30	Heat
18011503026	Female	14	2018011523:27:24	Respiratory infections
18011503026	Female	14	2018011523:27:24	Chest stuffy
18012201451	Female	14	2018012212:49:51	Abdominal pain
18012500012	Female	14	2018012500:40:56	Diarrhea
18012500012	Female	14	2018012500:40:56	Abdominal pain
18022702426	Female	14	2018022716:01:24	Chest stuffy
18032000837	Female	14	2018032008:53:25	Respiratory infections
18040100365	Female	14	2018040108:30:12	Heat
18040100365	Female	14	2018040108:30:12	Vomiting
18040100365	Female	14	2018040108:30:12	Diarrhea
16123123500	Female	14	2018040215:55:56	Asthma?
16123123500	Female	14	2018040215:55:56	Cough
18030302347	Female	14	2018040816:57:44	Bacterial infection
18030302347	Female	14	2018040816:57:44	Abdominal pain
18030302347	Female	14	2018040816:57:44	Chest stuffy
18041302352	Female	14	2018041319:15:04	Upper respiratory tract infection
18042303129	Female	14	2018042320:15:40	Cough
18042303129	Female	14	2018042320:15:40	Heat
18042502259	Female	14	2018042514:20:27	Upper respiratory tract infection
18051902536	Female	14	2018051919:37:20	Cough
18051902536	Female	14	2018051919:37:20	Heat
18051902563	Female	14	2018051919:53:00	Bacterial infection
18051902563	Female	14	2018051919:53:00	Abdominal pain
18051902536	Female	14	2018052013:52:09	Pulmonary infection
18051902536	Female	14	2018052110:29:05	Pulmonary infection
18051902536	Female	14	2018052209:05:35	Pulmonary infection
17043000021	Female	14	2018052219:05:35	Respiratory infections
18052001257	Female	14	2018052308:53:56	Vomiting
18051902536	Female	14	2018052309:03:52	Pulmonary infection
18052301315	Female	14	2018052310:00:22	Syncope
18052301315	Female	14	2018052310:00:22	Tachycardia
18052301817	Female	14	2018052312:11:22	Abdominal pain
18051902536	Female	14	2018052409:02:56	Pulmonary infection
18052402781	Female	14	2018052419:48:37	Respiratory infections
18052402990	Female	14	2018052422:15:20	Respiratory infections
18052402990	Female	14	2018052422:15:20	Heat
18051902536	Female	14	2018052508:26:35	Pulmonary infection
18051902536	Female	14	2018052608:13:35	Pulmonary infection
17043000021	Female	14	2018052616:48:01	Respiratory infections
18051902536	Female	14	2018052809:31:12	Pulmonary infection
18021500400	Female	14	2018052819:31:47	Nacpoor
18051902536	Female	14	2018052908:36:40	Pulmonary infection
18060402849	Female	14	2018060417:02:09	Be palpitations
18060402981	Female	14	2018060418:26:00	Abdominal pain
17080702481	Female	14	2018060618:52:32	Respiratory infections
18060801405	Female	14	2018060810:52:01	Upper respiratory tract infection
18061601559	Female	14	2018061613:19:24	Lackluster
18061801004	Female	14	2018061813:48:25	Whole blood cell reduction
18052900109	Female	14	2018062218:04:31	Pneumonia
17022803436	Female	14	2018070105:34:05	Diabetes
17022803436	Female	14	2018070105:34:05	Vomiting
17022803436	Female	14	2018070105:34:05	Heat
18070200181	Female	14	2018070206:48:25	Bacterial infection
18070200181	Female	14	2018070206:48:25	Abdominal pain
18070801908	Female	14	2018070821:39:08	Bronchitis
18070801908	Female	14	2018070821:39:08	Cough
18070801908	Female	14	2018070821:39:08	Heat
18071601793	Female	14	2018071611:30:23	Lymph node inflammation?
18072002303	Female	14	2018072021:10:11	Bacterial infection
18072002303	Female	14	2018072021:10:11	Gastritis
18072002303	Female	14	2018072021:10:11	Abdominal pain
18072002303	Female	14	2018072021:10:11	Allergic purpura
18081303217	Female	14	2018081322:47:23	Chest pain
18081900112	Female	14	2018081906:46:34	Respiratory infections
18081900112	Female	14	2018081906:46:34	Heat
18081900112	Female	14	2018082011:39:21	Heat
18081900112	Female	14	2018082011:39:21	Headache
18081900112	Female	14	2018082114:53:26	Headache
18081900112	Female	14	2018082114:53:26	Heat
18082802899	Female	14	2018082823:08:33	Anemia
18082802899	Female	14	2018082823:08:33	Respiratory infections
18082902533	Female	14	2018082919:30:11	Bacterial infection
18082902533	Female	14	2018082919:30:11	Abdominal pain
18082902533	Female	14	2018083110:15:55	Chest pain
17010224560	Female	14	2018083110:39:15	Respiratory infections
18083102531	Female	14	2018083121:23:20	Asthma
18083102531	Female	14	2018083122:08:33	Asthma
17010224560	Female	14	2018090115:02:04	Respiratory infections
18082802899	Female	14	2018090222:35:54	Viral infection
18082802899	Female	14	2018090222:35:54	Heat
17010224560	Female	14	2018090315:16:42	Respiratory infections
18090802463	Female	14	2018090821:03:50	Chest stuffy
18090802463	Female	14	2018090821:03:50	Chest pain
17081901162	Female	14	2018090910:05:14	Be palpitations
18091002925	Female	14	2018091020:12:57	Respiratory infections
18091200017	Female	14	2018091200:47:22	Chest pain
18091200897	Female	14	2018091209:08:35	Upper respiratory tract infection
18091200897	Female	14	2018091209:08:35	Heat
18091802623	Female	14	2018091820:46:14	Respiratory infections
17103101467	Female	14	2018091912:03:37	Pneumonia
17103101467	Female	14	2018091921:14:39	Pneumonia
18092002180	Female	14	2018092016:24:47	Numb
18092002180	Female	14	2018092016:24:47	Chest stuffy
17103101467	Female	14	2018092214:47:33	Pneumonia
17103101467	Female	14	2018092311:33:40	Pneumonia
18092301465	Female	14	2018092319:29:06	Pneumonia
18092301465	Female	14	2018092319:29:06	Heat
17103101467	Female	14	2018092408:28:12	Pneumonia
18092301465	Female	14	2018092412:18:22	Pneumonia
18092501610	Female	14	2018092512:00:31	Systemic lupus erythematosus?
18092501610	Female	14	2018092512:00:31	Heat
18092301465	Female	14	2018092512:14:53	Pneumonia
18092501989	Female	14	2018092514:13:53	Bacterial infection
18092501989	Female	14	2018092514:13:53	Heat
18092502545	Female	14	2018092518:23:53	Lymph node inflammation?
18092502545	Female	14	2018092518:23:53	Lymph node enlargement
17080702481	Female	14	2018092518:41:01	Bronchitis
17080702481	Female	14	2018092518:41:01	Respiratory infections
18092301465	Female	14	2018092615:46:11	Pneumonia
18092301465	Female	14	2018092716:10:40	Pneumonia
17010400314	Female	14	2018092718:03:32	Bacterial infection
17010400314	Female	14	2018092718:03:32	Heat
18092800100	Female	14	2018092809:24:57	Chest pain
18092301465	Female	14	2018092815:59:11	Heat
18092301465	Female	14	2018092815:59:11	Pneumonia
18092802224	Female	14	2018092820:16:10	Bacterial infection
18092802224	Female	14	2018092820:16:10	Heat
18092802224	Female	14	2018092820:16:10	Chest pain
18092901468	Female	14	2018092913:31:59	Bacterial infection
18092901468	Female	14	2018092913:31:59	Abdominal pain
18092301465	Female	14	2018092914:49:32	Pneumonia
17103101467	Female	14	2018093007:57:14	Pneumonia
18100300243	Female	14	2018100307:28:40	Gastritis
18100300327	Female	14	2018100308:05:43	Anemia
18100301413	Female	14	2018100319:08:02	Respiratory infections
18100902642	Female	14	2018100919:35:52	Chest stuffy
18071800025	Female	14	2018101016:32:45	Mickory inflammation
18071800025	Female	14	2018101016:32:45	Heat
18101500671	Female	14	2018101508:28:44	Diarrhea
18101500671	Female	14	2018101508:28:44	Abdominal pain
18101500671	Female	14	2018101508:28:44	Respiratory infections
18101601701	Female	14	2018101613:19:38	Respiratory infections
18101601701	Female	14	2018101613:19:38	Lackluster
18101601701	Female	14	2018101613:19:38	Chest stuffy
18102001782	Female	14	2018102014:21:40	Abdominal pain
18102502348	Female	14	2018102516:55:49	Foreign matter in esophagus?
18102601840	Female	14	2018102614:37:53	Heat
18102601840	Female	14	2018102614:37:53	Bronchitis
18102601840	Female	14	2018102614:37:53	Respiratory infections
18102601968	Female	14	2018102615:25:54	Respiratory infections
18102602398	Female	14	2018102620:14:02	Cough
18102601840	Female	14	2018102709:06:00	Bronchitis
18102601840	Female	14	2018102709:06:00	Respiratory infections
18102601840	Female	14	2018102809:17:49	Respiratory infections
18102801897	Female	14	2018102820:53:37	Respiratory infections
18102601840	Female	14	2018102906:54:57	Pulmonary infection
18102601840	Female	14	2018103006:52:03	Pulmonary infection
18103002584	Female	14	2018103018:26:08	Bacterial infection
18103002584	Female	14	2018103018:26:08	Abdominal pain
18102601840	Female	14	2018103106:57:17	Pulmonary infection
18103101854	Female	14	2018103113:32:03	Respiratory infections
18102601840	Female	14	2018110106:57:40	Pulmonary infection
18110400477	Female	14	2018110408:23:46	Chest pain
18110500576	Female	14	2018110508:25:25	Bacterial infection
18110500576	Female	14	2018110508:25:25	Gastritis
18110500576	Female	14	2018110508:25:25	Abdominal pain
18110503235	Female	14	2018110523:53:28	Er
18110702445	Female	14	2018110717:15:05	Chest stuffy
18102601840	Female	14	2018110718:02:23	Pulmonary infection
18110702937	Female	14	2018110723:44:08	Gastritis
18110702937	Female	14	2018110723:44:08	Diarrhea
18110702937	Female	14	2018110723:44:08	Heat
18110900030	Female	14	2018110901:56:03	Gastritis
18110900030	Female	14	2018110901:56:03	Vomiting
18110900030	Female	14	2018110901:56:03	Abdominal pain
18111101874	Female	14	2018111121:22:18	Be palpitations
18111202708	Female	14	2018111216:13:07	Gastritis
18111202708	Female	14	2018111216:13:07	Bloating
18111202708	Female	14	2018111216:13:07	Abdominal pain
18100300243	Female	14	2018111420:36:48	Bloating
18111501349	Female	14	2018111511:16:12	Gastritis
18111501349	Female	14	2018111511:16:12	Abdominal pain
18111600690	Female	14	2018111609:47:11	Vomiting
18111600690	Female	14	2018111609:47:11	Vertigo
18111701698	Female	14	2018111713:27:41	Pneumonia
18111702375	Female	14	2018111720:24:57	Bacterial infection
18111702375	Female	14	2018111720:24:57	Vomiting
18111702375	Female	14	2018111720:24:57	Heat
18111801080	Female	14	2018111812:00:34	Severe anemia
18111801080	Female	14	2018111812:00:34	Gastritis
18111801080	Female	14	2018111812:00:34	Heat
18111801080	Female	14	2018111812:00:34	Haemolytic anemia?
17091602482	Female	14	2018111919:01:26	Respiratory infections
17091602482	Female	14	2018111919:01:26	Cough
18112002881	Female	14	2018112021:57:00	Heat
18112200267	Female	14	2018112207:16:54	Heat
18112200267	Female	14	2018112207:16:54	Bronchitis
18112200267	Female	14	2018112207:16:54	Chest stuffy
18112200267	Female	14	2018112207:16:54	Respiratory infections
18112202628	Female	14	2018112220:13:35	Disgusting
18112202628	Female	14	2018112220:13:35	Vomiting
18112202628	Female	14	2018112220:13:35	Abdominal pain
18112202640	Female	14	2018112220:19:57	Respiratory infections
18112202640	Female	14	2018112220:19:57	Pain
18112200267	Female	14	2018112309:32:25	Pneumonia
18112200267	Female	14	2018112309:32:25	Heat
18112200267	Female	14	2018112413:22:20	Heat
18112200267	Female	14	2018112413:22:20	Pneumonia
18112402067	Female	14	2018112415:48:29	Respiratory infections
18112200267	Female	14	2018112510:53:50	Pneumonia
18112200267	Female	14	2018112609:25:23	Heat
18112200267	Female	14	2018112609:25:23	Pneumonia
18112602258	Female	14	2018112615:24:39	Chest stuffy
161230052655	Female	14	2018112808:27:22	Bacterial infection
161230052655	Female	14	2018112808:27:22	Abdominal pain
18120102141	Female	14	2018120114:48:54	Bacterial infection
18120102141	Female	14	2018120114:48:54	Urinary tract infection?
18111902278	Female	14	2018120214:53:42	Anemia
18012501601	Female	14	2018120318:21:49	Upper respiratory tract infection
17041100674	Female	14	2018120407:38:13	Upper respiratory tract infection
18012600868	Female	14	2018120413:15:21	Chest stuffy
18120502927	Female	14	2018120522:58:42	Gastritis
18120502927	Female	14	2018120522:58:42	Urinary tract infection
18120502927	Female	14	2018120522:58:42	Vomiting
18120602508	Female	14	2018120621:54:43	Respiratory infections
18120602508	Female	14	2018120621:54:43	Cough
18120701749	Female	14	2018120714:04:38	Respiratory infections
18120702478	Female	14	2018120721:17:39	Foreign bodies in the air duct?
18120801174	Female	14	2018120811:12:54	Abdominal pain
18120801174	Female	14	2018120811:12:54	Diarrhea
18120900544	Female	14	2018120909:50:40	Heat
18120901955	Female	14	2018120922:04:54	Intestinal infection
18120901955	Female	14	2018120922:04:54	Bacterial infection
18120901955	Female	14	2018120922:04:54	Ketosis?
18120901955	Female	14	2018120922:04:54	Liver function is not complete
18120901955	Female	14	2018120922:04:54	Gastritis
18121102425	Female	14	2018121121:10:05	Lower extremities pain
18121202569	Female	14	2018121220:15:26	Respiratory infections
18121202569	Female	14	2018121220:15:26	Cough
18121500756	Female	14	2018121509:46:08	Cervical lymphadenitis
18121501566	Female	14	2018121513:00:27	Gastritis
18121501566	Female	14	2018121513:00:27	Eating disorders
18121601205	Female	14	2018121612:35:22	Bronchitis
17072500061	Female	14	2018121700:28:45	Diarrhea
17072500061	Female	14	2018121700:28:45	Gastritis
18121802610	Female	14	2018121818:11:00	Abdominal pain
17010400314	Female	14	2018121819:28:44	Heat
18011100999	Female	14	2018121819:34:16	Bacterial infection
18011100999	Female	14	2018121819:34:16	Respiratory infections
18122001773	Female	14	2018122013:19:15	Bloating
18122002917	Female	14	2018122021:20:27	Bronchitis
17021702972	Female	14	2018122107:38:28	Hyperthyroidism
18122101637	Female	14	2018122112:43:37	Chest pain
18011100999	Female	14	2018122113:31:25	Respiratory infections
18122301988	Female	14	2018122320:42:19	Bronchitis
18122301988	Female	14	2018122419:02:16	Bronchitis
18122402798	Female	14	2018122420:03:20	Respiratory infections
17051301249	Female	14	2018122421:59:10	Viral infection
17051301249	Female	14	2018122421:59:10	Infectious fever
18122301988	Female	14	2018122516:45:22	Bronchitis
18122601500	Female	14	2018122611:20:48	Gastritis
18122601500	Female	14	2018122611:20:48	Abdominal pain
18122601730	Female	14	2018122614:08:37	Respiratory infections
18122602661	Female	14	2018122618:43:45	Respiratory infections
18122602661	Female	14	2018122819:58:10	Respiratory infections
18123002033	Female	14	2018123019:51:56	Abdominal pain
18123102476	Female	14	2018123121:00:38	Bacterial infection
18123102476	Female	14	2018123121:00:38	Diarrhea
18123102476	Female	14	2018123121:00:38	Vomiting
18123102476	Female	14	2018123121:00:38	Heat
18010100011	Male	15	2018010100:23:16	Bacterial infection
18010100011	Male	15	2018010100:23:16	Pneumonia
18010100011	Male	15	2018010100:23:16	Respiratory infections
18010100011	Male	15	2018010208:18:48	Bacterial infection
18010100011	Male	15	2018010208:18:48	Pneumonia
18010100011	Male	15	2018010208:18:48	Respiratory infections
18010200932	Male	15	2018010209:49:48	Nausea and vomiting
18010202606	Male	15	2018010215:49:45	Bronchitis
17121700224	Male	15	2018010306:48:39	T-muscular solubility
18010100011	Male	15	2018010307:37:05	Bacterial infection
18010100011	Male	15	2018010307:37:05	Pneumonia
18010202606	Male	15	2018010310:50:32	Pneumonia
18010100011	Male	15	2018010407:21:12	Bacterial infection
18010100011	Male	15	2018010407:21:12	Pneumonia
18010402937	Male	15	2018010422:42:06	Bacterial infection
18010402937	Male	15	2018010422:42:06	Respiratory infections
18010100011	Male	15	2018010507:27:24	Bacterial infection
18010100011	Male	15	2018010507:27:24	Pneumonia
18010402937	Male	15	2018010509:37:01	Respiratory infections
18010402937	Male	15	2018010606:59:04	Respiratory infections
18010100011	Male	15	2018010607:22:05	Bacterial infection
18010100011	Male	15	2018010607:22:05	Pneumonia
18010100011	Male	15	2018010707:11:25	Bacterial infection
18010100011	Male	15	2018010707:11:25	Pneumonia
18010101407	Male	15	2018010708:25:39	Respiratory infections
18010700390	Male	15	2018010708:45:08	Respiratory infections
18010802740	Male	15	2018010816:57:27	Pulmonary infection
18010802935	Male	15	2018010819:58:02	Heat
18010802935	Male	15	2018010819:58:02	Abdominal pain
18010803019	Male	15	2018010820:55:34	Headache
18010900921	Male	15	2018010909:31:00	Hypertension
18011001339	Male	15	2018011011:02:00	Vomiting
18010803019	Male	15	2018011200:29:52	Hypertension
18010803019	Male	15	2018011200:29:52	Headache
17121700224	Male	15	2018011208:33:44	T-muscular solubility
18011202241	Male	15	2018011217:30:10	Severe anemia
18011202241	Male	15	2018011217:30:10	Anemia of regeneration disorder
18011302258	Male	15	2018011320:18:14	Respiratory infections
17040100212	Male	15	2018011502:43:08	Pneumonia
18011501212	Male	15	2018011510:11:53	Upper respiratory tract infection
18011501212	Male	15	2018011510:11:53	Heat
18011600051	Male	15	2018011604:29:47	Heat
18011600051	Male	15	2018011604:29:47	Abdominal pain
18011600051	Male	15	2018011604:29:47	Gastritis
17040100212	Male	15	2018011605:12:11	Pneumonia
18011602822	Male	15	2018011623:04:18	Pulmonary infection
18011602822	Male	15	2018011623:04:18	Chest pain
17040100212	Male	15	2018011705:14:03	Pneumonia
18011602822	Male	15	2018011715:31:42	Heat
18011602822	Male	15	2018011715:31:42	Pulmonary infection
17040100212	Male	15	2018011805:52:48	Pneumonia
18011602822	Male	15	2018011812:05:24	Pneumonia
17040100212	Male	15	2018011905:10:12	Pneumonia
18011602822	Male	15	2018011912:52:01	Pulmonary infection
18011602822	Male	15	2018011912:52:01	Pneumonia
18012000070	Male	15	2018012004:35:31	Respiratory infections
18012000070	Male	15	2018012004:35:31	Heat
17040100212	Male	15	2018012005:04:01	Pneumonia
18011602822	Male	15	2018012006:09:21	Pulmonary infection
18012001001	Male	15	2018012009:45:59	Upper respiratory tract infection
18012101550	Male	15	2018012120:49:35	Upper respiratory tract infection
18012101550	Male	15	2018012120:49:35	Bronchitis
18012101550	Male	15	2018012120:49:35	Heat
18012101652	Male	15	2018012123:37:23	Chest pain
18012101652	Male	15	2018012123:37:23	Chest stuffy
18012200169	Male	15	2018012207:20:40	Heat
18012302466	Male	15	2018012320:06:34	Respiratory infections
18012302466	Male	15	2018012320:06:34	Heat
18012302461	Male	15	2018012320:06:56	Respiratory infections
18012501904	Male	15	2018012514:11:12	Pulmonary infection
17040100212	Male	15	2018012521:18:38	Pneumonia
18012602227	Male	15	2018012617:26:27	Respiratory infections
18012602375	Male	15	2018012620:28:30	Respiratory infections
18012702072	Male	15	2018012718:04:24	Respiratory infections
18012800978	Male	15	2018012812:49:46	Bacterial infection
18012800978	Male	15	2018012812:49:46	Heat
18012900056	Male	15	2018012904:52:58	Bacterial infection
18012900056	Male	15	2018012904:52:58	Heat
18012900056	Male	15	2018013007:12:23	Bacterial infection
18012900056	Male	15	2018013007:12:23	Heat
18012900056	Male	15	2018013107:26:57	Bacterial infection
18012900056	Male	15	2018013107:26:57	Heat
18012900056	Male	15	2018020107:23:17	Bacterial infection
18020300601	Male	15	2018020308:53:10	Nausea and vomiting
18020300601	Male	15	2018020308:53:10	Abdominal pain
18020302039	Male	15	2018020320:55:40	Bronchitis
18020401502	Male	15	2018020420:42:15	Respiratory infections
18020401502	Male	15	2018020420:42:15	Heat
18020600272	Male	15	2018020607:28:17	Lackluster
18020602399	Male	15	2018020619:40:37	Respiratory infections
18020602399	Male	15	2018020619:40:37	Heat
18020800415	Male	15	2018020808:03:27	Heat
18020400360	Male	15	2018020808:38:05	Chronic diarrhea
18020802010	Male	15	2018020816:34:29	Respiratory infections
18020802010	Male	15	2018020906:58:23	Respiratory infections
18020902095	Male	15	2018020920:41:43	Heat
18020802010	Male	15	2018021006:45:02	Respiratory infections
17121700224	Male	15	2018021008:28:34	T-muscular solubility
18020802010	Male	15	2018021106:47:22	Liver damage
18020802010	Male	15	2018021106:47:22	Infectious monocytosis
18021100466	Male	15	2018021110:00:54	Respiratory infections
18020802010	Male	15	2018021206:50:25	Infectious monocytosis
18020802010	Male	15	2018021206:50:25	Respiratory infections
18020802010	Male	15	2018021206:50:25	Liver damage
18020400360	Male	15	2018021211:07:23	Chronic diarrhea
18020802010	Male	15	2018021306:57:37	Liver damage
18020802010	Male	15	2018021306:57:37	Infectious monocytosis
18020802010	Male	15	2018021406:51:18	Liver damage
18020802010	Male	15	2018021406:51:18	Infectious monocytosis
18021400418	Male	15	2018021409:09:19	Anemia
18020802010	Male	15	2018021506:44:32	Infectious monocytosis
18020802010	Male	15	2018021506:44:32	Liver damage
18020802010	Male	15	2018021606:53:39	Infectious monocytosis
18020802010	Male	15	2018021606:53:39	Liver damage
18020802010	Male	15	2018021706:56:20	Liver damage
18020802010	Male	15	2018021706:56:20	Infectious monocytosis
18021700344	Male	15	2018021710:21:20	Tracheitis
18022002071	Male	15	2018022020:19:21	Respiratory infections
18022102324	Male	15	2018022115:55:30	Pulmonary infection
17061302468	Male	15	2018022308:58:22	Myocarditis testing
18022600582	Male	15	2018022608:07:25	Chest pain
17102801262	Male	15	2018022616:48:33	Respiratory infections
17102801262	Male	15	2018022616:48:33	Heat
18022800126	Male	15	2018022806:52:40	Hypokalemia
18022800126	Male	15	2018022806:52:40	Lackluster
18022800126	Male	15	2018022806:53:05	Urinary retention
18022800126	Male	15	2018022806:53:05	Lackluster
17121400908	Male	15	2018030210:39:18	Tracheitis
18030201351	Male	15	2018030212:02:24	Chest pain
18030202299	Male	15	2018030219:42:24	Heat
18030500921	Male	15	2018030509:03:50	Cough
18030602764	Male	15	2018030619:10:20	Respiratory infections
18030700406	Male	15	2018030707:37:07	Abdominal pain
18030902106	Male	15	2018030914:32:42	Bacterial infection
18030902106	Male	15	2018030914:32:42	Abdominal pain
18030902552	Male	15	2018030918:38:38	Pulmonary infection
18031002037	Male	15	2018031014:22:28	Respiratory infections
18031203488	Male	15	2018031222:39:00	Chest pain
18031302729	Male	15	2018031317:19:57	Respiratory infections
18031401412	Male	15	2018031410:23:21	Myocarditis
18031401859	Male	15	2018031412:38:16	Intestinal infection
18031401859	Male	15	2018031412:38:16	Abdominal pain
17011600676	Male	15	2018031420:03:33	Pulmonary infection
17020900732	Male	15	2018031510:07:41	Bacterial infection
17020900732	Male	15	2018031510:07:41	Abdominal pain
17011600676	Male	15	2018031520:06:25	Pulmonary infection
17110700216	Male	15	2018031608:59:20	Hypertension
18031601847	Male	15	2018031612:58:14	Pneumonia
18031601847	Male	15	2018031612:58:14	Cough
17011600676	Male	15	2018031619:59:31	Pulmonary infection
18031701367	Male	15	2018031710:38:22	Chest pain
18031702680	Male	15	2018031723:51:52	Bacterial infection
18031702680	Male	15	2018031723:51:52	Abdominal pain
17011600676	Male	15	2018031819:39:54	Pulmonary infection
17112702174	Male	15	2018031821:47:29	Headache
17112702174	Male	15	2018031821:47:29	Vomiting
17011600676	Male	15	2018031919:58:54	Pulmonary infection
18032000856	Male	15	2018032008:55:28	Intestinal infection
17011600676	Male	15	2018032019:41:22	Pulmonary infection
18032202218	Male	15	2018032214:22:29	Vomiting
18032202218	Male	15	2018032214:22:29	Abdominal pain
18032302786	Male	15	2018032321:59:51	Heat
18032402173	Male	15	2018032417:04:42	Electrolyte disturbance
18032402173	Male	15	2018032417:04:42	Alcohol poisoning
18032402216	Male	15	2018032417:39:04	Air
18032402295	Male	15	2018032419:01:35	Respiratory infections
18032701197	Male	15	2018032709:48:10	Respiratory infections?
18032801952	Male	15	2018032813:41:22	Heat
18032801952	Male	15	2018032813:41:22	Heat
18032900030	Male	15	2018032904:25:40	Intestinal infection
18033002264	Male	15	2018033015:43:45	Heat
18040101187	Male	15	2018040113:04:40	Respiratory infections
18040101187	Male	15	2018040113:04:40	Heat
17011101099	Male	15	2018040118:28:10	Mickory inflammation
18040101883	Male	15	2018040121:23:38	Bronchitis
17102402857	Male	15	2018040219:01:00	Upper respiratory tract infection
17102402857	Male	15	2018040219:01:00	Heat
18040203303	Male	15	2018040222:30:24	Respiratory infections
18040203303	Male	15	2018040310:51:56	Respiratory infections
18040302668	Male	15	2018040319:19:00	Bronchial asthma
17042800326	Male	15	2018040319:31:23	Abdominal pain
17042800326	Male	15	2018040319:31:23	Heat
18040401075	Male	15	2018040409:42:23	Diarrheal diseases
18040203303	Male	15	2018040410:26:56	Respiratory infections
17011101099	Male	15	2018040419:43:57	Liver damage?
17011101099	Male	15	2018040419:43:57	Infectious monocytosis
18040203303	Male	15	2018040613:28:22	Respiratory infections
18040702211	Male	15	2018040719:46:58	Upper respiratory tract infection
18040800714	Male	15	2018040809:21:34	Be palpitations
18040802484	Male	15	2018040822:03:03	Upper respiratory tract infection
18040900044	Male	15	2018040905:01:18	Bacterial infection
18040900044	Male	15	2018040905:01:18	Abdominal pain
18041101965	Male	15	2018041113:00:14	Medical examination
18041101968	Male	15	2018041113:00:45	Medical examination
18041301352	Male	15	2018041311:25:55	Respiratory infections
18041301352	Male	15	2018041311:25:55	Chest stuffy
18041400586	Male	15	2018041408:30:37	Bacterial infection
18041400586	Male	15	2018041408:30:37	Upper respiratory tract infection
18041400586	Male	15	2018041408:30:37	Heat
17102402857	Male	15	2018041420:43:32	Respiratory infections
18041402497	Male	15	2018041420:53:23	Respiratory infections
18041402497	Male	15	2018041420:53:23	Hives are infected with
17090901931	Male	15	2018041514:41:14	Cough
18041501663	Male	15	2018041517:29:56	Bronchial asthma
18041501663	Male	15	2018041517:29:56	Cough
18041501795	Male	15	2018041518:59:03	Respiratory infections
18041501795	Male	15	2018041518:59:03	Heat
18041601961	Male	15	2018041612:25:49	Bronchial asthma
18041602618	Male	15	2018041615:41:07	Chest stuffy
18041602764	Male	15	2018041616:08:11	Dizziness
18041603150	Male	15	2018041619:55:58	Purulent pachylitis
18041702921	Male	15	2018041719:55:25	Upper respiratory tract infection
18040702211	Male	15	2018041720:23:11	Diarrhea
18041800290	Male	15	2018041807:14:17	Lackluster
18041802755	Male	15	2018041818:08:03	Asthma
17102402857	Male	15	2018041818:57:36	Respiratory infections
18041901993	Male	15	2018041913:51:52	Abdominal pain
17101203190	Male	15	2018041917:16:46	Diabetes
17101203190	Male	15	2018041917:16:46	Chest pain
18042002603	Male	15	2018042020:21:29	Chest stuffy
18042101897	Male	15	2018042114:51:08	Bronchitis
18042101897	Male	15	2018042114:51:08	Cough
18042101981	Male	15	2018042115:30:58	Gastritis
18042101981	Male	15	2018042115:30:58	Abdominal pain
18042300027	Male	15	2018042303:11:28	Chest pain
18042300652	Male	15	2018042308:25:44	Respiratory infections
18042402713	Male	15	2018042419:32:00	Respiratory infections
18042402929	Male	15	2018042422:20:17	Respiratory infections
18042500609	Male	15	2018042508:02:27	Respiratory infections
18042500791	Male	15	2018042508:33:28	Abdominal pain
18042503072	Male	15	2018042521:09:56	Respiratory infections
18042602902	Male	15	2018042623:03:45	Arrhythmia
18042701645	Male	15	2018042712:13:34	Respiratory infections
18042702510	Male	15	2018042719:16:22	Bacterial infection
18042702510	Male	15	2018042719:16:22	Respiratory infections
18042801800	Male	15	2018042815:15:33	Chest pain
18042702510	Male	15	2018042816:09:30	Bacterial infection
18042702510	Male	15	2018042816:09:30	Respiratory infections
18042702510	Male	15	2018042916:49:23	Respiratory infections
18042902024	Male	15	2018042923:20:15	Respiratory infections
18042702510	Male	15	2018043017:37:02	Respiratory infections
18043002399	Male	15	2018043021:43:07	Heat
161230089805	Male	15	2018050106:04:39	Diarrhea
161230089805	Male	15	2018050106:04:39	Abdominal pain
18050101169	Male	15	2018050116:53:31	Respiratory infections
18050101169	Male	15	2018050116:53:31	Heat
18042702510	Male	15	2018050118:32:25	Respiratory infections
18050101344	Male	15	2018050119:34:39	Heat
18050200036	Male	15	2018050202:36:09	Alcohol poisoning
18050201973	Male	15	2018050211:42:09	Abdominal pain
18042702510	Male	15	2018050219:14:43	Respiratory infections
18050402744	Male	15	2018050418:16:54	Respiratory infections
18050402744	Male	15	2018050418:16:54	Chest stuffy
18050501830	Male	15	2018050513:12:44	Chest pain
18042702510	Male	15	2018050518:33:56	Respiratory infections
18050701298	Male	15	2018050709:34:38	Chest stuffy
18050703360	Male	15	2018050720:45:18	Respiratory infections
18050703360	Male	15	2018050720:45:18	Shoulder muscular pain
18050703360	Male	15	2018050720:45:18	Tachycardia
18050703360	Male	15	2018050720:45:18	Air
18050703360	Male	15	2018050720:45:18	Hives
18050700160	Male	15	2018050807:54:36	Pneumonia?
18050700160	Male	15	2018050807:54:36	Bronchitis
18050700160	Male	15	2018050906:01:32	Bronchitis
18050903113	Male	15	2018050920:01:45	Respiratory infections
18051000031	Male	15	2018051002:05:53	Abdominal pain
18050700160	Male	15	2018051005:58:29	Bronchitis
18051003002	Male	15	2018051018:55:40	Respiratory infections
18051102366	Male	15	2018051116:43:15	Respiratory infections
18051102737	Male	15	2018051121:37:24	Bronchitis
18051102737	Male	15	2018051121:37:24	Respiratory infections
18051102737	Male	15	2018051216:02:36	Respiratory infections
18051102737	Male	15	2018051318:18:45	Bronchitis
18051102737	Male	15	2018051318:18:45	Respiratory infections
18051400740	Male	15	2018051414:11:26	Respiratory infections
18051501520	Male	15	2018051511:02:57	Thrombocytopenia
17011101099	Male	15	2018051518:49:44	Upper respiratory tract infection
18051502778	Male	15	2018051520:40:02	Respiratory infections
18051502778	Male	15	2018051520:40:02	Gastritis
18051502778	Male	15	2018051520:40:02	Chest pain
18051600079	Male	15	2018051606:32:41	Upper abdominal pain
18032602649	Male	15	2018051608:59:28	Upper respiratory tract infection
17010280072	Male	15	2018051617:39:12	Upper respiratory tract infection
17010280072	Male	15	2018051617:39:12	Heat
18051700364	Male	15	2018051707:22:57	Abdominal pain
18051702635	Male	15	2018051716:10:28	Reflux oesophagitis?
18051702635	Male	15	2018051716:10:28	Chest pain
18051702826	Male	15	2018051717:51:57	Respiratory infections
17010280072	Male	15	2018051720:11:32	Heat
17010280072	Male	15	2018051720:11:32	Upper respiratory tract infection
18051703130	Male	15	2018051721:25:45	Bacterial infection
18051703130	Male	15	2018051721:25:45	Heat
18051800048	Male	15	2018051805:36:03	Muscle injury?
18051703130	Male	15	2018051815:21:44	Bacterial infection
18051703130	Male	15	2018051815:21:44	Heat
17010280072	Male	15	2018051820:49:40	Upper respiratory tract infection
18051900766	Male	15	2018051908:40:09	Pneumonia
17011101099	Male	15	2018051917:26:13	Bacterial infection
17011101099	Male	15	2018051917:26:13	Heat
17011101099	Male	15	2018051917:26:13	Upper respiratory tract infection
17112201935	Male	15	2018052008:38:48	Chest stuffy
18051703130	Male	15	2018052008:39:11	Bacterial infection
18051900766	Male	15	2018052010:35:35	Pneumonia
18052001259	Male	15	2018052013:28:49	Respiratory infections
18051703130	Male	15	2018052019:17:00	Bacterial infection
18051900766	Male	15	2018052110:27:34	Pneumonia
18052103039	Male	15	2018052119:57:59	Respiratory infections
18051900766	Male	15	2018052209:44:58	Pneumonia
18052103039	Male	15	2018052221:50:19	Respiratory infections
18052301978	Male	15	2018052313:15:27	Infectious fever
18051900766	Male	15	2018052313:43:43	Pneumonia
18052103039	Male	15	2018052315:44:13	Respiratory infections
18052302945	Male	15	2018052320:11:01	Stomach cramps?
18052401636	Male	15	2018052411:37:46	Leukocytosis
18052401636	Male	15	2018052411:37:46	Heat
18051900766	Male	15	2018052414:25:20	Pneumonia
18052403027	Male	15	2018052422:58:15	Virus infection
18052403027	Male	15	2018052422:58:15	Heat
18052500289	Male	15	2018052508:30:15	Chest pain
18052500289	Male	15	2018052510:09:13	Air
18052502105	Male	15	2018052514:39:42	Drug poisoning
18052403027	Male	15	2018052521:59:49	Heat
18052403027	Male	15	2018052521:59:49	Virus infection
18052803142	Male	15	2018052820:18:27	Pulmonary infection
18052803142	Male	15	2018052820:18:27	Infectious fever
18052803142	Male	15	2018052914:14:28	Infectious fever
18052803142	Male	15	2018052914:14:28	Pulmonary infection
18053000031	Male	15	2018053002:25:59	Respiratory infections
18052803142	Male	15	2018053013:53:13	Infectious fever
18052803142	Male	15	2018053013:53:13	Pulmonary infection
18053002782	Male	15	2018053019:44:00	Bronchitis
18050101344	Male	15	2018053020:09:21	Respiratory infections
18050101344	Male	15	2018053020:09:21	Heat
18053100025	Male	15	2018053101:49:46	Respiratory infections
18053100264	Male	15	2018053107:07:25	Abdominal pain
18052803142	Male	15	2018053114:06:03	Infectious fever
18052803142	Male	15	2018053114:06:03	Pulmonary infection
18030401061	Male	15	2018060107:24:45	Lymph node enlargement
18030401061	Male	15	2018060107:24:45	Respiratory infections
18052803142	Male	15	2018060115:07:27	Infectious fever
18052803142	Male	15	2018060115:07:27	Pulmonary infection
18060102183	Male	15	2018060116:02:56	Cough after infection
18060102183	Male	15	2018060116:02:56	Respiratory infections
18030401061	Male	15	2018060207:43:39	Respiratory infections
18030401061	Male	15	2018060207:43:39	Liver function damage
18030401061	Male	15	2018060207:43:39	Lymph node enlargement
18052803142	Male	15	2018060210:08:14	Pulmonary infection
18051900766	Male	15	2018060210:44:50	Pneumonia
18060202148	Male	15	2018060216:35:01	Foreign esophagus?
18060300005	Male	15	2018060300:17:18	Bronchitis
18060300005	Male	15	2018060300:17:18	Heat
18030401061	Male	15	2018060308:55:23	Liver function damage
18030401061	Male	15	2018060308:55:23	Lymph node enlargement
17090600109	Male	15	2018060318:35:20	Bronchitis
18060402227	Male	15	2018060413:39:26	Mickory inflammation
18060402227	Male	15	2018060413:39:26	Upper respiratory tract infection
18030401061	Male	15	2018060420:21:00	Virus infection
18030401061	Male	15	2018060420:21:00	Liver function damage
18030401061	Male	15	2018060420:21:00	Lymph node enlargement
18030401061	Male	15	2018060420:21:00	Heat
18050101344	Male	15	2018060421:17:28	Virus infection
18050101344	Male	15	2018060421:17:28	Heat
18060402227	Male	15	2018060509:16:38	Mickory inflammation
18060402227	Male	15	2018060509:16:38	Upper respiratory tract infection
17010103916	Male	15	2018060510:17:05	Heat
18050101344	Male	15	2018060513:49:33	Heat
18050101344	Male	15	2018060513:49:33	Virus infection
18060502702	Male	15	2018060519:13:43	Pneumonia
18060402227	Male	15	2018060609:01:28	Mickory inflammation
18060402227	Male	15	2018060609:01:28	Upper respiratory tract infection
18050101344	Male	15	2018060609:21:24	Virus infection
18050101344	Male	15	2018060609:21:24	Heat
18060502702	Male	15	2018060611:13:46	Pneumonia
18050101344	Male	15	2018060706:02:10	Virus infection
18060402227	Male	15	2018060709:28:41	Mickory inflammation
18060402227	Male	15	2018060709:28:41	Upper respiratory tract infection
18060502702	Male	15	2018060711:57:14	Pneumonia
18060502702	Male	15	2018060819:09:04	Pneumonia
18060802447	Male	15	2018060819:21:01	Respiratory infections
17011101099	Male	15	2018060910:46:20	Mickory inflammation
18060502702	Male	15	2018060912:17:09	Pneumonia
18060902034	Male	15	2018060920:24:59	Bronchitis
18060502702	Male	15	2018061015:08:20	Pneumonia
18061100118	Male	15	2018061106:46:58	Bacterial infection
18061100118	Male	15	2018061106:46:58	Vomiting
18061100118	Male	15	2018061106:46:58	Abdominal pain
18060502702	Male	15	2018061115:10:01	Pneumonia
18061103272	Male	15	2018061121:52:13	Diarrhea
18061103272	Male	15	2018061121:52:13	Vomiting
18042701268	Male	15	2018061210:49:41	Bacterial infection
18042701268	Male	15	2018061210:49:41	Diarrhea
18042701268	Male	15	2018061210:49:41	Abdominal pain
18061201930	Male	15	2018061213:03:40	Chest pain
18061103272	Male	15	2018061218:24:05	Vomiting
18061103272	Male	15	2018061218:24:05	Diarrhea
18061202822	Male	15	2018061219:48:14	Abdominal pain
17011101099	Male	15	2018061406:45:29	Upper respiratory tract infection
18061401767	Male	15	2018061412:45:24	Bloating to be examined
18061500009	Male	15	2018061500:30:00	Bacterial infection
18061500009	Male	15	2018061500:30:00	Diabetic ketoacidosis
18061502181	Male	15	2018061515:36:14	Respiratory infections
18061600910	Male	15	2018061609:28:40	Bronchitis
18061600910	Male	15	2018061609:28:40	Upper respiratory tract infection
17101203190	Male	15	2018061611:22:47	Ketosis
17101203190	Male	15	2018061611:22:47	Diabetes
18061600910	Male	15	2018061709:28:44	Bronchitis
17101203190	Male	15	2018061713:23:13	Bacterial infection
17101203190	Male	15	2018061713:23:13	Diabetes
17101203190	Male	15	2018061713:23:13	Ketosis
18061701256	Male	15	2018061716:20:33	Upper respiratory tract infection
18061701590	Male	15	2018061721:39:44	Nausea and vomiting
18061800021	Male	15	2018061801:36:34	Bacterial infection
18061800021	Male	15	2018061801:36:34	Ketosis
18061800021	Male	15	2018061801:36:34	Abdominal pain
18061800021	Male	15	2018061801:36:34	Respiratory infections
17101203190	Male	15	2018061809:52:10	Bacterial infection
17101203190	Male	15	2018061809:52:10	Diabetes
18061600910	Male	15	2018061813:02:59	Bronchitis
18061800021	Male	15	2018061903:32:39	Respiratory infections
18061800414	Male	15	2018061912:09:51	Kidney disease
18061800414	Male	15	2018061912:09:51	Heat
18061902039	Male	15	2018061913:56:48	Diarrhea
18061902039	Male	15	2018061913:56:48	Abdominal pain
18062001541	Male	15	2018062010:27:52	Respiratory infections
17031403328	Male	15	2018062021:01:28	Diarrhea
18062101057	Male	15	2018062109:15:29	Respiratory infections
17102402857	Male	15	2018062112:11:46	Respiratory infections
18062103021	Male	15	2018062123:51:33	Allergies
18062101057	Male	15	2018062207:57:09	Respiratory infections
18062201578	Male	15	2018062212:04:44	Chest stuffy
18062202651	Male	15	2018062222:20:06	Abdominal pain
18062401245	Male	15	2018062413:28:24	Bacterial infection
18062401245	Male	15	2018062413:28:24	Be palpitations
18062401245	Male	15	2018062413:28:24	Heat
18062601321	Male	15	2018062610:49:31	Gastritis
18062601321	Male	15	2018062610:49:31	Abdominal pain
18062702395	Male	15	2018062717:32:03	Intestinal infection
18062702395	Male	15	2018062717:32:03	Bacterial infection
18062702395	Male	15	2018062717:32:03	Heat
18062802569	Male	15	2018062821:23:32	Bronchitis
18062802569	Male	15	2018062821:23:32	Cough
18063000046	Male	15	2018063003:50:58	Heat
18062101057	Male	15	2018063006:40:26	Respiratory infections
17121700224	Male	15	2018070106:42:59	Allergic purpura?
18070202020	Male	15	2018070212:21:55	Gastritis
18070202020	Male	15	2018070212:21:55	Abdominal pain
17040100212	Male	15	2018070220:21:41	Diarrhea
17040100212	Male	15	2018070220:21:41	Gastritis
18032402216	Male	15	2018070400:22:50	Chronic pharyngeitis
18070601641	Male	15	2018070612:21:31	Pneumonia
18070602646	Male	15	2018070622:37:22	Bacterial infection
18070602646	Male	15	2018070622:37:22	Heat
18070601641	Male	15	2018070714:08:23	Pneumonia
18070800618	Male	15	2018070809:44:10	Vomiting
18070800618	Male	15	2018070809:44:10	Drug poisoning
18070800732	Male	15	2018070810:03:07	Pneumonia
18070800732	Male	15	2018070810:03:07	Bronchitis
18070601641	Male	15	2018070813:46:21	Pneumonia
18070800732	Male	15	2018070908:02:14	Pneumonia
18070601641	Male	15	2018070910:48:07	Pneumonia
18070601641	Male	15	2018071010:46:11	Pneumonia
18070800732	Male	15	2018071010:50:45	Pneumonia
18071002958	Male	15	2018071023:14:00	Viral infection
18071002958	Male	15	2018071023:14:00	Heat
18071002958	Male	15	2018071023:14:00	Abdominal pain
18070601641	Male	15	2018071111:18:43	Pneumonia
18071101833	Male	15	2018071112:54:09	Foreign object in esophagus
18071102139	Male	15	2018071114:33:06	Hypertension
18070800732	Male	15	2018071115:29:42	Pneumonia
18070800732	Male	15	2018071212:42:09	Pneumonia
18070800732	Male	15	2018071311:56:37	Pneumonia
18070601641	Male	15	2018071312:42:11	Pneumonia
17101203190	Male	15	2018071321:35:52	Diabetes
17101203190	Male	15	2018071321:35:52	Dizziness
18071400035	Male	15	2018071402:13:59	Abdominal pain
18070800732	Male	15	2018071411:54:37	Pneumonia
18071500014	Male	15	2018071500:54:49	Diabetes
18071500104	Male	15	2018071506:35:36	Bacterial infection
18071500104	Male	15	2018071506:35:36	Heat
18070800732	Male	15	2018071511:38:56	Pneumonia
18071602813	Male	15	2018071618:37:10	Respiratory infections
18072002322	Male	15	2018072021:04:17	Abdominal pain
18072201633	Male	15	2018072217:30:17	Infectious fever
18072201633	Male	15	2018072305:23:05	Heat
18072301863	Male	15	2018072312:16:46	Thin
18072502147	Male	15	2018072515:10:32	Health check
18072602607	Male	15	2018072620:42:15	Respiratory infections
18072602607	Male	15	2018072620:42:15	Heat
18072702391	Male	15	2018072718:10:31	Cough
18072801903	Male	15	2018072815:14:55	Thin
18072901796	Male	15	2018072918:49:50	Diarrhea
18072901796	Male	15	2018072918:49:50	Disgusting
18080102805	Male	15	2018080121:51:08	Bacterial infection
18080102805	Male	15	2018080121:51:08	Gastritis
18080102805	Male	15	2018080121:51:08	Stomach retention
18080102805	Male	15	2018080121:51:08	Heat
18080202024	Male	15	2018080214:31:51	Gastritis
18080202024	Male	15	2018080214:31:51	Acute gastric mucosal disease
18080202024	Male	15	2018080214:31:51	Drug poisoning
18080401212	Male	15	2018080410:56:05	Infectious fever
18080402238	Male	15	2018080423:18:26	Diarrhea
18080402238	Male	15	2018080423:18:26	Abdominal pain
18081001909	Male	15	2018081014:18:54	Infectious monocytosis?
18081001909	Male	15	2018081014:18:54	Heat
18081001909	Male	15	2018081110:12:46	Infectious monocytosis?
18081001909	Male	15	2018081110:12:46	Heat
18081001909	Male	15	2018081308:22:01	Infectious monocytosis?
18081001909	Male	15	2018081308:22:01	Heat
17121700224	Male	15	2018081308:41:45	Allergic purpura?
18081302936	Male	15	2018081318:30:21	Bacterial infection
18081302936	Male	15	2018081318:30:21	Heat
18081303005	Male	15	2018081319:31:08	Chest stuffy
18081303062	Male	15	2018081320:19:57	Infectious fever
18081401592	Male	15	2018081412:30:33	Abdominal pain
18081401592	Male	15	2018081412:30:33	Heat
18081401636	Male	15	2018081412:45:20	Digestive bleeding
18081001909	Male	15	2018081507:31:43	Infectious monocytosis?
18081001909	Male	15	2018081507:31:43	Heat
18082002118	Male	15	2018082014:04:51	Cough
18082002543	Male	15	2018082016:15:03	Abdominal pain
18082003093	Male	15	2018082023:41:16	Stomach retention
18082003093	Male	15	2018082023:41:16	Abdominal pain
18021900224	Male	15	2018082106:42:43	Liver damage
17110700216	Male	15	2018082208:45:36	Myocardial undersupply
17110700216	Male	15	2018082208:45:36	Hypertension Level 2 (very High Risk)
18082202444	Male	15	2018082216:04:27	Gastritis
18082202444	Male	15	2018082216:04:27	Diarrhea
18082302395	Male	15	2018082316:01:18	Bacterial infection
18082302395	Male	15	2018082316:01:18	Headache
18082302395	Male	15	2018082316:01:18	Heat
18072901796	Male	15	2018082511:03:58	Respiratory infections
18082901454	Male	15	2018082911:06:12	Gastritis
18083102371	Male	15	2018083119:28:46	Bacterial infection
18083102371	Male	15	2018083119:28:46	Respiratory infections
17032000734	Male	15	2018090108:21:48	Respiratory infections
18090101203	Male	15	2018090110:07:18	Respiratory infections
18083102371	Male	15	2018090116:56:31	Bacterial infection
18083102371	Male	15	2018090116:56:31	Respiratory infections
18090102503	Male	15	2018090120:20:46	Mickory inflammation
18090102503	Male	15	2018090120:20:46	Respiratory infections
17032000734	Male	15	2018090211:57:01	Respiratory infections
18090201501	Male	15	2018090217:18:41	Lackluster
17032000734	Male	15	2018090310:31:19	Respiratory infections
17032000734	Male	15	2018090415:23:55	Respiratory infections
18090500792	Male	15	2018090508:39:19	Abdominal pain
18090500792	Male	15	2018090508:39:19	Gastritis
18090500792	Male	15	2018090608:04:35	Gastritis
18090500792	Male	15	2018090608:04:35	Abdominal pain
18090601904	Male	15	2018090612:37:15	Dizziness
17102801262	Male	15	2018090816:24:34	Respiratory infections
17102801262	Male	15	2018090816:24:34	Cough
18090901043	Male	15	2018090911:04:32	Respiratory infections
18090902045	Male	15	2018090922:52:45	Respiratory infections
18091100014	Male	15	2018091101:04:06	Respiratory infections
18091100032	Male	15	2018091104:59:56	Respiratory infections
18091102973	Male	15	2018091123:01:58	Respiratory infections
18091200022	Male	15	2018091201:09:12	Abdominal pain
18091200040	Male	15	2018091203:16:47	Respiratory infections
18091200040	Male	15	2018091203:16:47	Bronchitis
18091202295	Male	15	2018091215:38:34	Asthma
18091202295	Male	15	2018091215:38:34	Respiratory failure
18091202295	Male	15	2018091215:38:34	Cough
18091300004	Male	15	2018091300:15:24	Nausea and vomiting
18091300004	Male	15	2018091300:15:24	Hypokalemia
18091200040	Male	15	2018091304:47:30	Bronchitis
18091200040	Male	15	2018091304:47:30	Respiratory infections
18090500792	Male	15	2018091307:22:34	Gastritis
18090500792	Male	15	2018091307:22:34	Abdominal pain
18091400315	Male	15	2018091407:27:15	Gastritis
18091200040	Male	15	2018091415:59:24	Bronchitis
18091200040	Male	15	2018091415:59:24	Respiratory infections
18091402739	Male	15	2018091423:22:39	Respiratory infections
18091400315	Male	15	2018091507:35:32	Gastritis
18091400315	Male	15	2018091607:10:37	Gastritis
18091802073	Male	15	2018091815:07:31	Heat
18091802073	Male	15	2018091815:07:31	Respiratory infections
18091802073	Male	15	2018091917:01:59	Heat
18091802073	Male	15	2018091917:01:59	Respiratory infections
18091902504	Male	15	2018091921:47:06	Foreign material in the digestive tract
18091802073	Male	15	2018092009:46:59	Respiratory infections
18092001682	Male	15	2018092013:18:00	Myocarditis?
18092001682	Male	15	2018092013:18:00	Be palpitations
18092002558	Male	15	2018092021:21:14	Bacterial infection
18092002558	Male	15	2018092021:21:14	Bronchitis
18092001682	Male	15	2018092107:15:32	Myocarditis?
18092001682	Male	15	2018092107:15:32	Be palpitations
18092102190	Male	15	2018092120:05:53	Infectious fever
18092201881	Male	15	2018092216:58:28	Hypertension
18092301127	Male	15	2018092313:27:59	Heat
18092301536	Male	15	2018092320:08:48	Respiratory infections
18092401252	Male	15	2018092421:16:56	Mickory inflammation
18092401252	Male	15	2018092421:16:56	Heat
18092600410	Male	15	2018092607:59:04	Chest pain
18092602662	Male	15	2018092623:27:43	Respiratory infections
18092702112	Male	15	2018092715:44:19	Respiratory infections
18092802385	Male	15	2018092823:05:56	Bacterial infection
18092802385	Male	15	2018092823:05:56	Abdominal pain
18092802385	Male	15	2018092823:05:56	Diarrhea
18092901939	Male	15	2018092918:01:50	Chest pain
18093000765	Male	15	2018093009:49:16	Vomiting
18092201455	Male	15	2018100109:09:26	Infectious fever
18092201455	Male	15	2018100109:09:26	Hyperuricaemia
18092201455	Male	15	2018100109:09:26	Haematuria
18100101364	Male	15	2018100119:17:07	Ketosis
18100101364	Male	15	2018100119:17:07	Gastritis
18100101364	Male	15	2018100119:17:07	Vomiting
18100101537	Male	15	2018100122:11:22	Chest stuffy
18100101543	Male	15	2018100122:21:09	Respiratory infections
18100101543	Male	15	2018100122:21:09	Cough
18100101543	Male	15	2018100122:21:09	Infectious fever
18092201455	Male	15	2018100209:00:36	Infectious fever
18092201455	Male	15	2018100306:34:51	Haematuria
18092201455	Male	15	2018100306:34:51	Infectious fever
18100101543	Male	15	2018100313:22:57	Respiratory infections
18092201455	Male	15	2018100406:43:04	Infectious fever
18092201455	Male	15	2018100406:43:04	Haematuria
18100401220	Male	15	2018100409:32:44	Diabetes
18100401220	Male	15	2018100409:32:44	Stress ulcer
18100401220	Male	15	2018100409:32:44	Abnormal renal function
18100401220	Male	15	2018100409:32:44	Diabetic ketoacidosis
18100101543	Male	15	2018100413:57:00	Respiratory infections
18092201455	Male	15	2018100506:36:34	Urinary tract infection
18092201455	Male	15	2018100506:36:34	Infectious fever
18100101543	Male	15	2018100516:12:28	Respiratory infections
18100101543	Male	15	2018100614:07:21	Respiratory infections
18100101543	Male	15	2018100714:55:26	Pulmonary infection
18100101543	Male	15	2018100714:55:26	Respiratory infections
18100701830	Male	15	2018100719:08:51	Disgusting
17010205741	Male	15	2018100817:00:46	Respiratory infections
18100101543	Male	15	2018100818:53:25	Pulmonary infection
18100101543	Male	15	2018100818:53:25	Respiratory infections
18100900027	Male	15	2018100902:25:36	Bacterial infection
18100900027	Male	15	2018100902:25:36	Respiratory infections
18090902018	Male	15	2018100921:25:39	Diarrhea
18090902018	Male	15	2018100921:25:39	Abdominal pain
18100800301	Male	15	2018101009:37:03	Abdominal pain
18100101543	Male	15	2018101015:31:58	Pulmonary infection
17110700216	Male	15	2018101108:49:48	Electrolyte metabolism disorders
17110700216	Male	15	2018101108:49:48	Hypertension Level 3 (very High Risk)
18100401220	Male	15	2018101115:08:47	Diabetic ketoacidosis
18100401220	Male	15	2018101115:08:47	Diabetes
18100401220	Male	15	2018101115:08:47	Stress ulcer
18100401220	Male	15	2018101115:08:47	Abnormal renal function
18101202492	Male	15	2018101217:52:29	Hypertension
18101202492	Male	15	2018101217:52:29	Respiratory infections
18101202492	Male	15	2018101309:34:58	Bronchitis
18101202492	Male	15	2018101309:34:58	Respiratory infections
18101302255	Male	15	2018101319:23:51	Heat
18101202492	Male	15	2018101417:17:32	Bronchitis
18101202492	Male	15	2018101417:17:32	Respiratory infections
18100900027	Male	15	2018101600:23:31	Pneumonia?
18100900027	Male	15	2018101600:23:31	Heat
18101601498	Male	15	2018101612:05:41	Pulmonary infection
18101601498	Male	15	2018101612:05:41	Chest stuffy
17110700216	Male	15	2018101810:13:50	Hypertension Level 3 (very High Risk)
18102000088	Male	15	2018102006:35:14	Haematuria
18101601498	Male	15	2018102010:47:01	Pulmonary infection
18102001879	Male	15	2018102014:57:32	Respiratory infections
18102200014	Male	15	2018102201:17:47	Diarrhea
18102200014	Male	15	2018102201:17:47	Abdominal pain
18102200014	Male	15	2018102201:17:47	Vomiting
18102300736	Male	15	2018102309:01:34	Hypertension
18102300823	Male	15	2018102309:36:43	Headache
18102301640	Male	15	2018102312:10:16	Lymph node inflammation
18102000088	Male	15	2018102420:11:02	Be palpitations
18102602391	Male	15	2018102620:08:41	Chest pain
18012001001	Male	15	2018102908:53:03	Respiratory infections
18012001001	Male	15	2018102908:53:03	Headache
18103000934	Male	15	2018103009:33:52	Hypertension
18103002151	Male	15	2018103015:14:07	Headache
18103002151	Male	15	2018103015:14:07	Hypertension
18103002621	Male	15	2018103018:50:26	Bacterial infection
18103002621	Male	15	2018103018:50:26	Hypertension
18103002621	Male	15	2018103018:50:26	Headache
18103002621	Male	15	2018103018:50:26	Heat
18103002621	Male	15	2018103119:31:19	Bacterial infection
18103002621	Male	15	2018103119:31:19	Heat
18103002621	Male	15	2018103119:31:19	Headache
18110101132	Male	15	2018110109:50:10	Chest pain
18103002621	Male	15	2018110118:27:04	Respiratory infections
18103002621	Male	15	2018110118:27:04	Bacterial infection
18110201392	Male	15	2018110211:00:12	Abdominal pain
18110201392	Male	15	2018110211:00:12	Vomiting
18110201392	Male	15	2018110211:00:12	Er, reverse disease
18103002621	Male	15	2018110214:17:44	Bacterial infection
18103002621	Male	15	2018110214:17:44	Respiratory infections
18103002621	Male	15	2018110317:51:52	Respiratory infections
18103002621	Male	15	2018110317:51:52	Bacterial infection
18110401165	Male	15	2018110411:36:12	Bacterial infection
18110401165	Male	15	2018110411:36:12	Bronchial asthma
18110401825	Male	15	2018110418:52:31	Alcohol poisoning
16123196325	Male	15	2018110422:05:36	Upper respiratory tract infection
16123196325	Male	15	2018110422:05:36	Heat
18110401165	Male	15	2018110516:52:03	Bacterial infection
18110401165	Male	15	2018110516:52:03	Bronchial asthma
18110401165	Male	15	2018110618:19:27	Bacterial infection
18110401165	Male	15	2018110618:19:27	Bronchial asthma
18111101029	Male	15	2018111112:04:53	Chest pain
18111101758	Male	15	2018111119:31:52	Respiratory infections
18111101758	Male	15	2018111119:31:52	Cough
18052702066	Male	15	2018111121:27:18	Mickory inflammation
18052702066	Male	15	2018111121:27:18	Heat
18111200903	Male	15	2018111209:08:23	Acute abscess pachian inflammation
18111200903	Male	15	2018111209:08:23	Infectious fever
18052702066	Male	15	2018111306:19:13	Cough
18052702066	Male	15	2018111306:19:13	Heat
18111300470	Male	15	2018111308:05:03	Abdominal pain
17032203121	Male	15	2018111319:11:46	Bronchitis
17032203121	Male	15	2018111319:11:46	Cough
18052702066	Male	15	2018111406:22:04	Mickory inflammation
18111502378	Male	15	2018111518:45:17	Bacterial infection
18111502378	Male	15	2018111518:45:17	Diarrhea
18111502378	Male	15	2018111518:45:17	Abdominal pain
18111602333	Male	15	2018111618:09:30	Bacterial infection
18111602333	Male	15	2018111618:09:30	Respiratory infections
18032100045	Male	15	2018111711:21:14	Acute gastritis
18111200903	Male	15	2018111711:26:02	Viral infection
18111200903	Male	15	2018111711:26:02	Mickory inflammation
18111200903	Male	15	2018111809:55:00	Viral infection
18111200903	Male	15	2018111809:55:00	Mickory inflammation
18111802016	Male	15	2018111822:12:36	Infectious fever
18111802016	Male	15	2018111822:12:36	Respiratory infections
18111802016	Male	15	2018111822:12:36	Dizziness
18111200903	Male	15	2018111908:18:25	Viral infection
18111200903	Male	15	2018111908:18:25	White cell reduction
18111200903	Male	15	2018111908:18:25	Mickory inflammation
18103002621	Male	15	2018111917:48:39	Hypertension
18111903095	Male	15	2018111920:49:15	Abdominal pain
18111903107	Male	15	2018111921:02:35	Heat
18111903226	Male	15	2018111923:14:36	Cough
18111903226	Male	15	2018111923:14:36	Bronchitis
18111200903	Male	15	2018112008:29:39	Viral infection
18111200903	Male	15	2018112008:29:39	White cell reduction
18111200903	Male	15	2018112008:29:39	Mickory inflammation
18112002491	Male	15	2018112017:21:50	Respiratory infections
18111200903	Male	15	2018112109:10:02	White cell reduction
18111200903	Male	15	2018112109:10:02	Mickory inflammation
18112100455	Male	15	2018112110:07:28	Hypertension
18092400047	Male	15	2018112115:41:14	Upper respiratory tract infection
18042300027	Male	15	2018112120:38:40	Nausea and vomiting
18112202577	Male	15	2018112219:44:33	Mickory inflammation
18112202577	Male	15	2018112219:44:33	Thyopharyngetis
18112300657	Male	15	2018112308:40:45	Gastritis
18112300657	Male	15	2018112308:40:45	Abdominal pain
18112300748	Male	15	2018112308:58:01	Cough
18112301136	Male	15	2018112310:12:38	Infectious mononucleosis, other?
18112301136	Male	15	2018112310:12:38	Acute machitis
18112301136	Male	15	2018112310:12:38	Liver damage
18112301136	Male	15	2018112310:12:38	Heat
18111200903	Male	15	2018112313:50:59	Mickory inflammation
18112400698	Male	15	2018112408:42:17	Abdominal pain
18112402468	Male	15	2018112420:26:33	Respiratory infections
18112402468	Male	15	2018112420:26:33	Heat
18112602803	Male	15	2018112620:10:09	Dizziness
18092602662	Male	15	2018112622:16:14	Respiratory infections
161230034065	Male	15	2018112720:25:04	Respiratory infections
161230034065	Male	15	2018112720:25:04	Bacterial infection
161230034065	Male	15	2018112720:25:04	Heat
18112702668	Male	15	2018112721:15:55	Cough
18112702668	Male	15	2018112721:15:55	Respiratory infections
18112802757	Male	15	2018112820:18:12	Cough
161230034065	Male	15	2018112907:52:58	Bacterial infection
161230034065	Male	15	2018112907:52:58	Heat
161230034065	Male	15	2018112907:52:58	Respiratory infections
18112900603	Male	15	2018112908:21:55	Respiratory infections
18112900641	Male	15	2018112908:28:39	Chest pain
18041501795	Male	15	2018112921:20:17	Heat
18113001770	Male	15	2018113013:35:31	Respiratory infections
18120100193	Male	15	2018120107:01:02	Bacterial infection
18120100193	Male	15	2018120107:01:02	Diarrhea
18120100193	Male	15	2018120107:01:02	Infectious fever
18112701658	Male	15	2018120108:05:52	Health check
18120200602	Male	15	2018120209:13:17	Respiratory infections
18120202150	Male	15	2018120221:51:04	Pneumonia
18120302068	Male	15	2018120313:11:49	Respiratory infections
18120402874	Male	15	2018120420:59:18	Respiratory infections
18120500748	Male	15	2018120508:53:45	Hypertension?
18120502295	Male	15	2018120515:33:46	Respiratory infections
18120502295	Male	15	2018120515:33:46	Cough
18120502695	Male	15	2018120519:45:52	Heat
18120502695	Male	15	2018120519:45:52	Urinary tract infection
18102602391	Male	15	2018120605:16:36	Heat
18120601951	Male	15	2018120615:22:18	Bacterial infection
18120601951	Male	15	2018120615:22:18	Chest stuffy
18120601951	Male	15	2018120615:22:18	Heat
18120601951	Male	15	2018120615:22:18	Hypertension
18120602203	Male	15	2018120617:45:14	Respiratory infections
18112900641	Male	15	2018120707:09:53	Chest pain
18120700414	Male	15	2018120708:06:02	Colitis
18120700526	Male	15	2018120708:30:02	Mickory inflammation
18120702231	Male	15	2018120717:56:16	Nausea and vomiting
18070202898	Male	15	2018120803:15:01	Respiratory infections
18070202898	Male	15	2018120803:15:01	Heat
161230157747	Male	15	2018120820:34:27	Bacterial infection
161230157747	Male	15	2018120820:34:27	Respiratory infections
161230157747	Male	15	2018120820:34:27	Syncope
18110200325	Male	15	2018120915:33:02	Cough
18120901996	Male	15	2018120922:58:36	Abdominal pain
18120901996	Male	15	2018120922:58:36	Gastritis
18120500748	Male	15	2018121007:27:19	Hypertension
18120300345	Male	15	2018121011:16:41	Proteinuria
18121101417	Male	15	2018121111:29:33	Be palpitations
18121101457	Male	15	2018121111:45:12	Electrolyte metabolism disorders
18121101457	Male	15	2018121111:45:12	Gastritis
18121101457	Male	15	2018121111:45:12	Stomach retention
18121101457	Male	15	2018121111:45:12	Abdominal pain
18121101562	Male	15	2018121112:31:58	Asthma bronchitis
18121200016	Male	15	2018121202:33:43	Respiratory infections
18120300345	Male	15	2018121207:29:11	Proteinuria
18121202640	Male	15	2018121221:10:09	Bacterial infection
18121202640	Male	15	2018121221:10:09	Thrombocytopenia
18121202640	Male	15	2018121221:10:09	Gastritis
18121202640	Male	15	2018121221:10:09	Headache
18121202640	Male	15	2018121221:10:09	Heat
18121302751	Male	15	2018121321:15:14	Chest pain
18121302751	Male	15	2018121321:15:14	Be palpitations
18121400145	Male	15	2018121406:47:25	Lymph node enlargement
18121400145	Male	15	2018121406:47:25	Infectious fever
18121402381	Male	15	2018121418:26:56	Bronchitis
18121402381	Male	15	2018121418:26:56	Respiratory infections
18121402419	Male	15	2018121418:55:44	Electrolyte metabolism disorders
18121402419	Male	15	2018121418:55:44	Alcohol poisoning
18121501188	Male	15	2018121510:48:15	Bacterial infection
18121501188	Male	15	2018121510:48:15	Bronchitis
18110200325	Male	15	2018121615:06:45	Respiratory infections
18110200325	Male	15	2018121615:06:45	Cough
18121800320	Male	15	2018121807:28:18	Lymph node enlargement
18121800537	Male	15	2018121808:08:43	Respiratory infections
18121800627	Male	15	2018121808:29:48	Infectious fever
18121802430	Male	15	2018121816:16:01	Chest pain
18121900051	Male	15	2018121905:52:23	Bacterial infection
18121900051	Male	15	2018121905:52:23	Vomiting
18121900056	Male	15	2018121906:01:25	Chest stuffy
18122001369	Male	15	2018122011:04:16	Bacterial infection
18122001551	Male	15	2018122011:45:00	Stomach retention
18122001551	Male	15	2018122011:45:00	Abdominal pain
18122003021	Male	15	2018122022:50:24	Bacterial infection
18122003021	Male	15	2018122022:50:24	Syncope
18122003021	Male	15	2018122022:50:24	Convulsions
18122003021	Male	15	2018122022:50:24	Infectious fever
18122300785	Male	15	2018122310:06:11	Whole blood cell reduction
18122300785	Male	15	2018122310:06:11	Thrombocytopenia
18122300785	Male	15	2018122310:06:11	White cell reduction
18110200325	Male	15	2018122313:55:09	Respiratory infections
18120500748	Male	15	2018122407:49:52	Hypertension
18122402979	Male	15	2018122421:16:24	Foreign matter in esophagus?
18120500748	Male	15	2018122607:03:07	Hyperuricaemia
18120500748	Male	15	2018122607:03:07	Hypertension
18122501660	Male	15	2018122608:55:06	Respiratory infections
18122501660	Male	15	2018122608:55:06	Heat
18122700058	Male	15	2018122702:21:54	Bacterial infection
18122700058	Male	15	2018122702:21:54	Gastritis
18122700058	Male	15	2018122702:21:54	Heat
18122700058	Male	15	2018122702:21:54	Respiratory infections
18122501660	Male	15	2018122717:46:43	Respiratory infections
18122501660	Male	15	2018122717:46:43	Heat
18122700058	Male	15	2018122804:45:38	Bacterial infection
18122700058	Male	15	2018122804:45:38	Respiratory infections
18122700058	Male	15	2018122804:45:38	Heat
18122800065	Male	15	2018122805:12:18	Heat
18122700058	Male	15	2018122908:52:11	Bacterial infection
18122700058	Male	15	2018122908:52:11	Respiratory infections
18122700058	Male	15	2018122908:52:11	Heat
18041102739	Male	15	2018122913:13:31	Haemoptysis
18123000199	Male	15	2018123007:14:30	Bacterial infection
18123000199	Male	15	2018123007:14:30	Respiratory infections
18123000357	Male	15	2018123008:06:31	Bacterial infection
18123000357	Male	15	2018123008:06:31	Eating disorders
18123000357	Male	15	2018123008:06:31	Gastritis
18123000357	Male	15	2018123008:06:31	Heat
18122700058	Male	15	2018123010:47:58	Respiratory infections
18123001571	Male	15	2018123015:04:16	Heat
18123001571	Male	15	2018123015:04:16	Pneumonia
18123001903	Male	15	2018123017:59:48	Respiratory infections
18123001903	Male	15	2018123017:59:48	Heat
18123001571	Male	15	2018123109:34:10	Pneumonia
18122700058	Male	15	2018123112:30:18	Respiratory infections
18123102554	Male	15	2018123122:19:14	Respiratory infections
18123102554	Male	15	2018123122:19:14	Heat
18010203208	Female	15	2018010222:38:15	Heat
18010400030	Female	15	2018010401:59:48	Respiratory infections
18010402674	Female	15	2018010418:59:28	Upper respiratory tract infection
18010402674	Female	15	2018010418:59:28	Heat
18010500757	Female	15	2018010509:52:41	Respiratory infections
18010500757	Female	15	2018010509:52:41	Heat
18010501795	Female	15	2018010513:41:56	Infectious fever
18010601884	Female	15	2018010614:40:50	Respiratory infections
18010601884	Female	15	2018010614:40:50	Heat
18010700077	Female	15	2018010706:23:42	Bacterial infection
18010700077	Female	15	2018010706:23:42	Upper respiratory tract infection
18010701231	Female	15	2018010714:16:30	Abdominal pain
18010700077	Female	15	2018010814:12:52	Upper respiratory tract infection
18010700077	Female	15	2018010814:12:52	Bacterial infection
17092002448	Female	15	2018010818:17:01	Respiratory infections
18010700077	Female	15	2018010906:21:42	Upper respiratory tract infection
18011001897	Female	15	2018011014:52:27	Respiratory infections
18011002617	Female	15	2018011023:53:05	Acute hives
18011102288	Female	15	2018011117:54:51	Bacterial infection
18011102288	Female	15	2018011117:54:51	Respiratory infections
18011202310	Female	15	2018011218:45:13	Respiratory infections
18011202310	Female	15	2018011311:42:16	Respiratory infections
18011202310	Female	15	2018011408:43:41	Respiratory infections
18011401462	Female	15	2018011417:55:17	Respiratory infections
18011502890	Female	15	2018011521:03:25	Respiratory infections
18011700570	Female	15	2018011708:23:08	Bacterial infection
18011700570	Female	15	2018011708:23:08	Vomiting
18011700570	Female	15	2018011708:23:08	Gastritis
18011802415	Female	15	2018011816:30:31	Upper respiratory tract infection
18011900003	Female	15	2018011900:15:13	Pneumonia
18011900064	Female	15	2018011906:03:45	Ketosis
18011900064	Female	15	2018011906:03:45	Nausea and vomiting
18011900064	Female	15	2018011906:03:45	Headache
18012002363	Female	15	2018012023:03:28	Respiratory infections
18012002363	Female	15	2018012023:03:28	Heat
18012400021	Female	15	2018012401:10:07	Heat
18012400021	Female	15	2018012401:10:07	Virus infection
18012400152	Female	15	2018012406:55:56	Respiratory infections
18012502405	Female	15	2018012517:06:46	Nausea and vomiting
18012701845	Female	15	2018012715:28:43	Anemia
18012701845	Female	15	2018012715:28:43	Respiratory infections
18020100261	Female	15	2018020107:25:51	Anemia
18020202392	Female	15	2018020220:12:47	Upper respiratory tract infection
18020202392	Female	15	2018020220:12:47	Heat
18020202412	Female	15	2018020220:32:53	Lower abdominal pain
18020401054	Female	15	2018020415:16:47	Syncope to be checked
18020500015	Female	15	2018020501:10:40	Respiratory infections
18020501075	Female	15	2018020510:29:21	Allergic shock
18020600047	Female	15	2018020605:29:41	Bacterial infection
18020600047	Female	15	2018020605:29:41	Respiratory infections
18020600047	Female	15	2018020707:14:16	Bacterial infection
18020600047	Female	15	2018020707:14:16	Respiratory infections
18020600047	Female	15	2018020805:28:13	Respiratory infections
18020801061	Female	15	2018020810:20:57	Asthma
18020600047	Female	15	2018020915:23:13	Respiratory infections
18021000653	Female	15	2018021009:35:36	Hypertension
18021001260	Female	15	2018021014:26:15	Infectious fever
17031401082	Female	15	2018021022:02:31	Mickory inflammation
17031401082	Female	15	2018021022:02:31	Heat
18021101156	Female	15	2018021121:03:32	Infectious fever
17031401082	Female	15	2018021319:12:10	Heat
17031401082	Female	15	2018021319:12:10	Mickory inflammation
161230093311	Female	15	2018021423:22:28	Abdominal pain
18021600759	Female	15	2018021714:32:33	Mickory inflammation
18021800234	Female	15	2018021808:13:45	Bronchitis
18021600759	Female	15	2018021809:51:55	Throat inflammation
18021600759	Female	15	2018021809:51:55	Mickory inflammation
18021900011	Female	15	2018021900:51:29	Chest pain
161230093311	Female	15	2018021910:19:01	Respiratory infections
161230093311	Female	15	2018022008:21:15	Health check
18022001167	Female	15	2018022011:16:27	Respiratory infections
18022203221	Female	15	2018022222:12:13	Rash
18022203221	Female	15	2018022222:12:13	Heat
18022300016	Female	15	2018022300:50:46	Bacterial infection
18022300016	Female	15	2018022300:50:46	Abdominal pain
18022300016	Female	15	2018022320:18:23	Bacterial infection
18022300016	Female	15	2018022320:18:23	Abdominal pain
18022300016	Female	15	2018022419:43:56	Bacterial infection
18022300016	Female	15	2018022419:43:56	Abdominal pain
18030400038	Female	15	2018030403:02:08	Bacterial infection
18030400038	Female	15	2018030403:02:08	Hyposodium haematosis
18030400038	Female	15	2018030403:02:08	Hypokalemia
18030400038	Female	15	2018030403:02:08	Nausea and vomiting
18030400038	Female	15	2018030403:02:08	Heat
18030400038	Female	15	2018030508:51:30	Bacterial infection
18030400038	Female	15	2018030508:51:30	Heat
18030400038	Female	15	2018030508:51:30	Hypokalemia
18030400038	Female	15	2018030508:51:30	Nausea and vomiting
18030600003	Female	15	2018030600:09:07	Upper respiratory tract infection
18030600003	Female	15	2018030600:09:07	Heat
18030702363	Female	15	2018030715:02:46	Respiratory infections
18030702363	Female	15	2018030715:02:46	Be palpitations
18030702363	Female	15	2018030715:02:46	Chest stuffy
18030801973	Female	15	2018030814:14:06	Intestinal infection
18030901412	Female	15	2018030910:41:11	Ketosis
18030901412	Female	15	2018030910:41:11	Heat
18030901412	Female	15	2018030910:41:11	Nausea and vomiting
17121900783	Female	15	2018031019:11:53	Respiratory infections
18031301560	Female	15	2018031310:52:08	Foreign object in esophagus
17042002047	Female	15	2018031512:01:48	After kidney transplant
17042002047	Female	15	2018031512:01:48	Giant cell virus infection
18031501995	Female	15	2018031513:44:59	Acute pharyngitis
18012800237	Female	15	2018031612:40:09	Abdominal pain
18031602853	Female	15	2018031620:54:45	Upper respiratory tract infection
18031701657	Female	15	2018031712:18:31	Respiratory infections
18031702464	Female	15	2018031719:31:59	Be palpitations
18031801129	Female	15	2018031811:48:23	Increased creatase
18031801129	Female	15	2018031811:48:23	Respiratory infections
18031801154	Female	15	2018031811:57:13	Respiratory infections
18031900808	Female	15	2018031908:49:04	Dizziness
18031902276	Female	15	2018031913:27:18	Gastritis
18031902276	Female	15	2018031913:27:18	Abdominal pain
18032000226	Female	15	2018032007:08:33	Nephritis
18032002872	Female	15	2018032019:50:43	Bronchitis
18032002872	Female	15	2018032019:50:43	Respiratory infections
18032100158	Female	15	2018032106:44:56	Bacterial infection
18032100158	Female	15	2018032106:44:56	Diarrhea
18032100158	Female	15	2018032106:44:56	Bloating
18032100288	Female	15	2018032109:36:58	Hypoglycemia
18032100288	Female	15	2018032109:36:58	Awareness barriers
18032102262	Female	15	2018032114:49:31	Pneumonia
18032002872	Female	15	2018032116:05:24	Respiratory infections
18032002872	Female	15	2018032116:05:24	Bronchitis
18032103097	Female	15	2018032122:40:06	Abdominal pain to be examined
18032201694	Female	15	2018032211:23:06	Heat
18032002872	Female	15	2018032213:51:45	Respiratory infections
18032102262	Female	15	2018032216:10:56	Pneumonia
18032202884	Female	15	2018032219:54:58	Awareness barriers
18032202884	Female	15	2018032220:10:26	Awareness barriers
18032203046	Female	15	2018032222:00:41	Abdominal pain
18032300612	Female	15	2018032308:13:33	Lymph node inflammation?
18020801061	Female	15	2018032309:40:48	Bronchial asthma take-away
18032102262	Female	15	2018032317:33:23	Pneumonia
18032401517	Female	15	2018032412:05:28	Bronchitis
18032401517	Female	15	2018032412:05:28	Cough
18031801129	Female	15	2018032414:33:33	Respiratory infections
18032102262	Female	15	2018032415:13:16	Pneumonia
18032402478	Female	15	2018032421:48:51	Bronchitis
18032102262	Female	15	2018032512:54:47	Pneumonia
18032501478	Female	15	2018032515:27:14	Cough
18032501604	Female	15	2018032516:53:29	Respiratory infections
18032600149	Female	15	2018032607:08:10	Health check
18032102262	Female	15	2018032612:22:19	Pneumonia
18032102262	Female	15	2018032712:57:35	Pneumonia
18032702796	Female	15	2018032719:28:06	Be palpitations
18032900733	Female	15	2018032908:41:24	Upper respiratory tract infection
18032902503	Female	15	2018032916:48:31	Respiratory infections
18040101734	Female	15	2018040119:27:25	Respiratory alkaline poisoning
18040202457	Female	15	2018040214:37:00	Bacterial infection
18040202457	Female	15	2018040214:37:00	Vomiting
18040202457	Female	15	2018040214:37:00	Heat
18040203181	Female	15	2018040220:43:55	Chest stuffy
18040203181	Female	15	2018040220:43:55	Chest pain
18040203276	Female	15	2018040306:34:59	Cough
18040203276	Female	15	2018040306:34:59	Upper respiratory tract infection
18040300357	Female	15	2018040307:38:56	Upper respiratory tract infection
18040302774	Female	15	2018040320:24:49	Abdominal pain
18040402727	Female	15	2018040420:59:06	Abdominal pain
18040601481	Female	15	2018040611:20:00	Upper respiratory tract infection
18032102262	Female	15	2018040612:21:47	Pneumonia
18040602369	Female	15	2018040617:16:11	Chest stuffy
18040701486	Female	15	2018040713:07:12	Be palpitations
18040800846	Female	15	2018040810:09:28	Upper respiratory tract infection
18040800966	Female	15	2018040810:25:02	Digestive bleeding
18040900372	Female	15	2018040907:20:39	Health check
18040903023	Female	15	2018040919:39:44	Respiratory infections
18040903023	Female	15	2018041017:04:02	Respiratory infections
18041001811	Female	15	2018041110:22:48	Occasional premature beats in the room
16123152340	Female	15	2018041111:16:45	Bacterial infection
16123152340	Female	15	2018041111:16:45	Heat
18040903023	Female	15	2018041112:58:27	Respiratory infections
18041102563	Female	15	2018041115:48:22	Chest stuffy
18041102930	Female	15	2018041119:16:57	Liver failure
18041102930	Female	15	2018041119:16:57	Anemia
18041201623	Female	15	2018041211:04:22	Sinus tachycardia
18041201932	Female	15	2018041213:00:57	Bacterial infection
18041201932	Female	15	2018041213:00:57	Ketosis
18041201932	Female	15	2018041213:00:57	Abdominal pain
18040903023	Female	15	2018041214:45:36	Respiratory infections
18041300613	Female	15	2018041308:50:02	Respiratory infections
17010245327	Female	15	2018041411:54:46	Respiratory infections
17010245327	Female	15	2018041415:50:42	Pulmonary infection
17010245327	Female	15	2018041415:50:42	Respiratory infections
17010245327	Female	15	2018041509:47:09	Pulmonary infection
18041501609	Female	15	2018041516:51:01	Bacterial infection
18041501609	Female	15	2018041516:51:01	Heat
18041600165	Female	15	2018041606:52:12	Bacterial infection
18041600165	Female	15	2018041606:52:12	Upper respiratory tract infection
18041600521	Female	15	2018041607:52:33	Upper respiratory tract infection
17010245327	Female	15	2018041608:14:06	Pulmonary infection
18020101023	Female	15	2018041617:31:28	Respiratory infections
18020101023	Female	15	2018041707:19:31	Respiratory infections
17010245327	Female	15	2018041707:20:52	Pulmonary infection
18041700587	Female	15	2018041708:05:34	Be palpitations
18041800024	Female	15	2018041803:02:41	Abdominal pain
18020101023	Female	15	2018041807:18:54	Respiratory infections
17010245327	Female	15	2018041807:27:09	Gastritis
17010245327	Female	15	2018041807:27:09	Pulmonary infection
18041803037	Female	15	2018041821:32:47	Asthma
18020101023	Female	15	2018041907:14:53	Respiratory infections
17010245327	Female	15	2018041910:12:21	Pneumonia
18041902618	Female	15	2018041918:02:42	Bacterial infection
18041902618	Female	15	2018041918:02:42	Respiratory infections
18041902836	Female	15	2018041920:27:40	Respiratory infections
18041902889	Female	15	2018041920:59:44	Cough
18041902889	Female	15	2018041920:59:44	Heat
18020101023	Female	15	2018042007:04:44	Respiratory infections
17010245327	Female	15	2018042009:55:42	Pneumonia
18042002551	Female	15	2018042019:28:25	Respiratory infections
18042100240	Female	15	2018042107:13:58	Syncope
17010245327	Female	15	2018042109:24:12	Pneumonia
17010245327	Female	15	2018042210:16:39	Pneumonia
18042201241	Female	15	2018042213:02:43	Respiratory infections
18042201245	Female	15	2018042213:05:06	Respiratory infections
18042201505	Female	15	2018042215:53:19	Upper respiratory tract infection
18041902836	Female	15	2018042219:48:06	Respiratory infections
18041902836	Female	15	2018042219:48:06	Cough
17010245327	Female	15	2018042307:08:54	Pneumonia
18042301310	Female	15	2018042310:55:39	Syncope
18042201505	Female	15	2018042312:56:30	Upper respiratory tract infection
18042402687	Female	15	2018042419:05:39	Be palpitations
18042402864	Female	15	2018042421:25:46	Bacterial infection
18042402864	Female	15	2018042421:25:46	Respiratory infections
161230065061	Female	15	2018042503:52:58	Cough
18042402864	Female	15	2018042520:40:49	Bacterial infection
18042402864	Female	15	2018042520:40:49	Respiratory infections
18042503209	Female	15	2018042523:48:55	Respiratory infections
18042600040	Female	15	2018042604:34:14	Bacterial infection
18042600040	Female	15	2018042604:34:14	Heat
18042402864	Female	15	2018042619:37:10	Bacterial infection
18042402864	Female	15	2018042619:37:10	Respiratory infections
18042702546	Female	15	2018042719:51:31	Heat
18042702546	Female	15	2018042719:51:31	Bronchitis
18042702546	Female	15	2018042719:51:31	Cough
18042702658	Female	15	2018042721:17:41	Respiratory infections
18022300016	Female	15	2018042722:08:54	Bacterial infection
18022300016	Female	15	2018042722:08:54	Upper respiratory tract infection
18022300016	Female	15	2018042722:08:54	Heat
18022300016	Female	15	2018042810:35:25	Bacterial infection
18022300016	Female	15	2018042810:35:25	Heat
18022300016	Female	15	2018042810:35:25	Upper respiratory tract infection
18042801861	Female	15	2018042815:48:24	Muscle contracture
18043001735	Female	15	2018043014:20:17	Respiratory infections
18043002460	Female	15	2018050100:01:04	Chest stuffy
161230065061	Female	15	2018050112:43:41	Bacterial infection
161230065061	Female	15	2018050112:43:41	Pneumonia
161230065061	Female	15	2018050112:43:41	Cough
18050101452	Female	15	2018050121:15:11	Abdominal pain
18050200807	Female	15	2018050208:32:25	Abdominal pain
161230065061	Female	15	2018050221:30:20	Pneumonia
161230065061	Female	15	2018050318:58:53	Pneumonia
18020801061	Female	15	2018050409:25:36	Bronchial asthma take-away
161230065061	Female	15	2018050420:06:05	Pneumonia
18050501936	Female	15	2018050513:43:05	Abdominal pain
18050502462	Female	15	2018050517:32:45	Bloating
161230065061	Female	15	2018050521:27:02	Pneumonia
18050601036	Female	15	2018050610:20:33	Abdominal pain
18050601345	Female	15	2018050612:21:16	Respiratory infections
18050601958	Female	15	2018050619:13:29	Bronchitis
18050602221	Female	15	2018050622:41:48	Virus infection?
18050602221	Female	15	2018050622:41:48	Anemia
18050602221	Female	15	2018050622:41:48	Respiratory infections
18050700070	Female	15	2018050706:15:14	Respiratory infections
18050700616	Female	15	2018050707:59:18	Abdominal pain
18050701470	Female	15	2018050710:03:40	Be palpitations
18050702124	Female	15	2018050712:21:20	Abdominal pain
18051002953	Female	15	2018051018:28:33	Bacterial infection
18051002953	Female	15	2018051018:28:33	Heat
18051002953	Female	15	2018051018:28:33	Chest stuffy
18051502948	Female	15	2018051523:48:07	Pneumonia
18050901717	Female	15	2018051709:27:32	Abdominal pain
18051702780	Female	15	2018051717:18:39	Diarrhea
18051702780	Female	15	2018051717:18:39	Nausea and vomiting
17121900783	Female	15	2018051808:14:00	Respiratory infections
18051900736	Female	15	2018051908:32:06	Lymph node inflammation
18051902130	Female	15	2018051915:00:34	Chest stuffy
18052000055	Female	15	2018052006:10:40	Intestinal infection
18052000055	Female	15	2018052006:10:40	Abdominal pain
16123152340	Female	15	2018052010:24:37	Bacterial infection
16123152340	Female	15	2018052010:24:37	Heat
18052102207	Female	15	2018052113:56:06	Chest pain
18052102984	Female	15	2018052119:22:21	Virus infection
18052102984	Female	15	2018052119:22:21	Leukocytosis
18052102984	Female	15	2018052119:22:21	Heat
18052402999	Female	15	2018052422:40:52	Bleeding of the nose
18040800966	Female	15	2018052502:41:18	Bacterial infection
18040800966	Female	15	2018052502:41:18	Ulcerative colitis
18040800966	Female	15	2018052502:41:18	Inflammatory bowel disease
18040800966	Female	15	2018052502:41:18	Digestive bleeding
18040800966	Female	15	2018052502:41:18	Diarrhea
18052500275	Female	15	2018052507:09:25	Respiratory infections
18052500275	Female	15	2018052507:09:25	Bronchial asthma
18052502198	Female	15	2018052515:08:43	Abdominal pain
18052602420	Female	15	2018052619:36:05	Cough
18052800036	Female	15	2018052803:18:24	Gastritis
18052800036	Female	15	2018052803:18:24	Abdominal pain
18052902718	Female	15	2018052919:46:55	Respiratory infections
18052902847	Female	15	2018052921:19:51	Vomiting
18053100421	Female	15	2018053107:35:09	Abdominal pain
17112102322	Female	15	2018053109:43:30	Be palpitations
18053101536	Female	15	2018053111:22:17	Vomiting
18053101536	Female	15	2018053111:22:17	Abdominal pain
18011900064	Female	15	2018060222:31:02	Asthma
18060402221	Female	15	2018060414:04:15	Stomach pain
18060402827	Female	15	2018060416:39:08	Respiratory infections
18060402827	Female	15	2018060416:39:08	Heat
17112102322	Female	15	2018060508:59:17	Hypokalemia
18060602015	Female	15	2018060613:13:25	Heat
18060702754	Female	15	2018060720:48:19	Upper respiratory tract infection
18060800006	Female	15	2018060800:26:35	Ketosis
18060800006	Female	15	2018060800:26:35	Respiratory infections
18060800006	Female	15	2018060800:26:35	Heat
18060800006	Female	15	2018060813:22:22	Respiratory infections
18060800006	Female	15	2018060813:22:22	Heat
18060800006	Female	15	2018060919:14:10	Bacterial infection
18060800006	Female	15	2018060919:14:10	Heat
18061001732	Female	15	2018061018:30:31	Diarrhea
18061001732	Female	15	2018061018:30:31	Heat
18060800006	Female	15	2018061019:18:38	Bacterial infection
18060800006	Female	15	2018061019:18:38	Heat
18061103075	Female	15	2018061119:44:45	Respiratory infections
18011300920	Female	15	2018061313:06:48	Upper respiratory tract infection
18061302637	Female	15	2018061321:25:53	Respiratory infections
18061402091	Female	15	2018061414:37:46	Cough
18061601371	Female	15	2018061611:47:54	Abdominal pain
18061701269	Female	15	2018061716:27:40	Diarrhea
18061900017	Female	15	2018061901:21:19	Mickory inflammation
18061900017	Female	15	2018061901:21:19	Upper respiratory tract infection
18062101726	Female	15	2018062111:49:06	Intestinal infection
18062101726	Female	15	2018062111:49:06	Bacterial infection
18062101726	Female	15	2018062111:49:06	Diarrhea
18062101726	Female	15	2018062111:49:06	Heat
18062201390	Female	15	2018062210:49:46	Diarrhea
18062201390	Female	15	2018062210:49:46	Abdominal pain
18062300519	Female	15	2018062307:56:33	Diarrhea
18062302413	Female	15	2018062322:29:34	Hypokalemia
18062302413	Female	15	2018062322:29:34	Heat
17092302518	Female	15	2018062520:10:49	Upper respiratory tract infection
18062600242	Female	15	2018062607:13:33	Health check
17092302518	Female	15	2018062619:54:54	Upper respiratory tract infection
17092302518	Female	15	2018062619:54:54	Virus infection
18062701727	Female	15	2018062712:46:28	Bronchitis
18062701727	Female	15	2018062712:46:28	Cough
17092302518	Female	15	2018062720:12:05	Virus infection
17092302518	Female	15	2018062720:12:05	Upper respiratory tract infection
17092302518	Female	15	2018062819:46:00	Virus infection
18050502462	Female	15	2018062905:47:24	Bloating check
18063002205	Female	15	2018063019:16:54	Bacterial infection
18063002205	Female	15	2018063019:16:54	Pain
18063002294	Female	15	2018063021:41:08	Cough
18063002294	Female	15	2018063021:41:08	Upper respiratory tract infection
18070101932	Female	15	2018070120:41:29	Respiratory infections
18020801061	Female	15	2018070509:17:54	Asthma
18070502605	Female	15	2018070519:13:33	Bacterial infection
18070502605	Female	15	2018070519:13:33	Mickory inflammation
18070502605	Female	15	2018070519:13:33	Heat
18071102700	Female	15	2018071119:31:01	Cough
18071102700	Female	15	2018071119:31:01	Heat
18071200061	Female	15	2018071206:24:25	Bacterial infection
18071200061	Female	15	2018071206:24:25	Heat
18071200441	Female	15	2018071207:34:51	Thin
17051702894	Female	15	2018071223:18:05	Upper respiratory tract infection
17051702894	Female	15	2018071223:18:05	Syncope
18071300669	Female	15	2018071410:48:43	Diarrhea
18071300669	Female	15	2018071410:48:43	Abdominal pain
18071402345	Female	15	2018071419:58:45	Respiratory infections
18071500055	Female	15	2018071505:21:56	Bacterial infection
18071500055	Female	15	2018071505:21:56	Heat
18071900312	Female	15	2018071907:21:07	Excessive growth hormone production
18071902155	Female	15	2018071915:44:38	Bacterial infection
18071902155	Female	15	2018071915:44:38	Gastritis
18071902155	Female	15	2018071915:44:38	Abdominal pain
18071902155	Female	15	2018071915:44:38	Diarrhea
18072101662	Female	15	2018072113:14:57	Sepsis
18072101662	Female	15	2018072113:14:57	Infectious fever
18072101662	Female	15	2018072113:14:57	Metastatic lung tumors
18072101662	Female	15	2018072113:14:57	Whole blood cell reduction
18072101662	Female	15	2018072113:14:57	Particle cell deficiency
18072101662	Female	15	2018072113:14:57	After chemotherapy for bone tumors
18072200888	Female	15	2018072210:23:51	Bronchitis
18072200888	Female	15	2018072210:23:51	Cough
18072200778	Female	15	2018072310:16:31	Headache
161230093311	Female	15	2018072815:16:39	Back pain
18072802016	Female	15	2018072816:13:28	Intracranial infection?
18072802016	Female	15	2018072816:13:28	Epilepsy ?
18072802016	Female	15	2018072816:13:28	Syncope
18072802016	Female	15	2018072909:22:16	Sepsis
18072802016	Female	15	2018072909:22:16	Urinary tract infection
18072802016	Female	15	2018072909:22:16	Syncope
18072802016	Female	15	2018072909:22:16	Intracranial infection?
18073000014	Female	15	2018073000:31:00	Abdominal pain
18072800185	Female	15	2018073014:57:34	Respiratory infections
18072800185	Female	15	2018073014:57:34	Mickory inflammation
18073002535	Female	15	2018073016:15:52	Heat
18073002535	Female	15	2018073016:15:52	Diarrhea
18073100030	Female	15	2018073102:30:29	Abdominal pain
18073100030	Female	15	2018073102:30:29	Diarrhea
18072800185	Female	15	2018073107:23:17	Respiratory infections
18072800185	Female	15	2018080106:02:10	Respiratory infections
18080102627	Female	15	2018080119:12:20	Intestinal infection
18080102627	Female	15	2018080119:12:20	Diarrhea
18080600006	Female	15	2018080600:27:50	Chest pain
18080700186	Female	15	2018080707:08:22	Syncope
18080701369	Female	15	2018080712:44:19	Bacterial infection
18080701369	Female	15	2018080712:44:19	Heat
18081100613	Female	15	2018081108:18:54	Cough
18081200005	Female	15	2018081200:30:54	Bacterial infection
18081200005	Female	15	2018081200:30:54	Respiratory infections
18081200005	Female	15	2018081200:30:54	Heat
18081303127	Female	15	2018081321:13:51	Viral infection
18081303127	Female	15	2018081321:13:51	Heat
18081303127	Female	15	2018081415:53:44	Viral infection
18081303127	Female	15	2018081415:53:44	Heat
18051700176	Female	15	2018081515:36:46	Electrolyte metabolism disorders
18051700176	Female	15	2018081515:36:46	Connective tissue disease?
18051700176	Female	15	2018081515:36:46	Lymph node enlargement
18051700176	Female	15	2018081515:36:46	Liver damage
18051700176	Female	15	2018081515:36:46	Heat
18081303127	Female	15	2018081515:37:09	Viral infection
18081502722	Female	15	2018081520:54:45	Chest pain
18081303127	Female	15	2018081615:14:07	Infectious monocytosis?
18081303127	Female	15	2018081615:14:07	Liver function is not complete
18081303127	Female	15	2018081615:14:07	Heat
18081303127	Female	15	2018081615:14:07	Liver damage
18081303127	Female	15	2018081615:14:07	Viral infection
18081602528	Female	15	2018081618:05:39	Abdominal pain
18081702241	Female	15	2018081716:45:46	Abdominal pain
18081702241	Female	15	2018081716:45:46	Respiratory infections
18081801497	Female	15	2018081813:55:52	Syncope
18081802009	Female	15	2018081817:50:07	Urinary tract infection
18081802009	Female	15	2018081817:50:07	Heat
18020101023	Female	15	2018081917:49:41	Cough
18020101023	Female	15	2018081917:49:41	Respiratory infections
18060200243	Female	15	2018082106:48:13	Health check
18082302186	Female	15	2018082414:03:49	Chest stuffy
18082501927	Female	15	2018082514:46:03	Chest pain
18051700176	Female	15	2018082908:59:13	Connective tissue disease?
18051700176	Female	15	2018082908:59:13	Heat
18051700176	Female	15	2018082908:59:13	Lymph node enlargement
18051700176	Female	15	2018082908:59:13	Liver damage
18051700176	Female	15	2018083010:40:30	Gastritis
18051700176	Female	15	2018083010:40:30	Connective tissue disease?
18051700176	Female	15	2018083010:40:30	Heat
18051700176	Female	15	2018083010:40:30	Liver damage
18051700176	Female	15	2018083010:40:30	Lymph node enlargement
18083001368	Female	15	2018083011:09:21	Bacterial infection
18083001368	Female	15	2018083011:09:21	Heat
18083001368	Female	15	2018083011:09:21	Respiratory infections
18083100037	Female	15	2018083105:02:14	Diarrhea
18083100037	Female	15	2018083105:02:14	Abdominal pain
18051700176	Female	15	2018083114:01:52	Connective tissue disease?
18051700176	Female	15	2018083114:01:52	Lymph node enlargement
18051700176	Female	15	2018083114:01:52	Liver damage
18051700176	Female	15	2018083114:01:52	Heat
18090200609	Female	15	2018090209:37:09	Abdominal pain
18090201669	Female	15	2018090219:34:11	Chest stuffy
18090201669	Female	15	2018090219:34:11	Gastritis
18090400001	Female	15	2018090400:09:03	Bacterial infection
18090400001	Female	15	2018090400:09:03	Intestinal infection
18090700012	Female	15	2018090700:53:02	Bacterial infection
18090700012	Female	15	2018090700:53:02	Diabetic ketoacidosis
18090700012	Female	15	2018090700:53:02	Diabetes
18090700012	Female	15	2018090700:53:02	Gastritis
18090700012	Female	15	2018090700:53:02	Nausea and vomiting
18090700012	Female	15	2018090700:53:02	Dizziness
18090701649	Female	15	2018090712:51:17	Respiratory infections
18020801061	Female	15	2018090810:21:02	Asthma
18090801591	Female	15	2018090811:50:40	Bronchitis
18090801591	Female	15	2018090811:50:40	Allergic rhinitis with asthma
18090801591	Female	15	2018090811:50:40	Heat
18090901952	Female	15	2018090921:17:11	Respiratory infections
18091001066	Female	15	2018091010:03:29	Upper respiratory tract infection
18091001351	Female	15	2018091010:30:04	Chest stuffy
18091003072	Female	15	2018091021:45:18	Respiratory infections
18091102492	Female	15	2018091117:07:37	Gastritis
18091102492	Female	15	2018091117:07:37	Respiratory infections
16123196328	Female	15	2018091120:26:07	Bacterial infection
16123196328	Female	15	2018091120:26:07	Heat
18091202539	Female	15	2018091218:05:50	Chest stuffy
18091300151	Female	15	2018091306:41:14	Heat
18091300151	Female	15	2018091306:41:14	Respiratory infections
18091300151	Female	15	2018091306:41:14	Syncope
18091301467	Female	15	2018091311:10:38	Respiratory infections
18051700176	Female	15	2018091316:26:26	Gastritis
18051700176	Female	15	2018091316:26:26	Chest stuffy
18051700176	Female	15	2018091316:26:26	Liver damage
18051700176	Female	15	2018091316:26:26	Heat
18011700620	Female	15	2018091407:36:35	Bronchitis
18091402638	Female	15	2018091421:17:57	Bacterial infection
18091402638	Female	15	2018091421:17:57	Respiratory infections
16123196328	Female	15	2018091620:30:43	Bacterial infection
16123196328	Female	15	2018091620:30:43	Heat
18091700090	Female	15	2018091706:35:38	Cough
18091702804	Female	15	2018091718:53:00	Pneumonia
18091702804	Female	15	2018091718:53:00	Respiratory infections
18091702994	Female	15	2018091720:49:22	Gastritis
18091702994	Female	15	2018091720:49:22	Cough
18091702994	Female	15	2018091720:49:22	Vomiting
18091702994	Female	15	2018091720:49:22	Chest stuffy
18091800023	Female	15	2018091801:19:14	Cough
18091800023	Female	15	2018091801:19:14	Pain
18090801883	Female	15	2018091807:00:42	Abdominal pain
18091702804	Female	15	2018091813:39:58	Pneumonia
18091700090	Female	15	2018091908:05:56	Heat
18091702804	Female	15	2018091910:48:49	Pneumonia
18091902282	Female	15	2018091919:01:50	Mickory inflammation
18091702804	Female	15	2018092011:14:35	Pneumonia
18092002386	Female	15	2018092019:03:48	Cough
18092002528	Female	15	2018092021:00:17	Bacterial infection
18092002528	Female	15	2018092021:00:17	Cough
18092002655	Female	15	2018092023:15:33	Be palpitations
18011300927	Female	15	2018092108:13:22	Bacterial infection
18011300927	Female	15	2018092108:13:22	Infectious fever
18091702804	Female	15	2018092111:27:57	Pneumonia
16123196328	Female	15	2018092119:40:02	Bacterial infection
16123196328	Female	15	2018092119:40:02	Heat
18091702804	Female	15	2018092211:17:38	Pneumonia
[truncated: 985,108+ more rows]
