# Supplementary material for: Dynamic changes of emergency visits: a retrospective observational study
Source: BMC Emerg Med. 2022 Jun 11;22:105. doi: 10.1186/s12873-022-00654-0 (PMC9187931; doi:10.1186/s12873-022-00654-0)
Supplement: Supplementary file 3 — Additional file 3. [file 12873_2022_654_MOESM3_ESM.xlsx]

## Sheet: Sheet1
Medical Record No.	Gender	Age	Date of Admission	Principal Diagnosis
19010201785	Male	1	2019010211:19:54	Heat
19011200727	Female	1	2019011209:02:46	Respiratory infections
19021802849	Female	1	2019021821:43:51	Diarrhea
19071800751	Female	1	2019071808:27:41	Upper respiratory tract infection
19072900906	Male	1	2019101614:52:46	Tracheitis
19072900906	Male	1	2019101614:52:46	Viral infection
18022702996	Female	2	2019010710:47:38	Heat
18021201831	Male	2	2019032211:08:57	Respiratory infections
17060301716	Male	2	2019050514:30:50	Upper respiratory tract infection
19060300260	Female	2	2019060307:10:32	Heat
19060300260	Female	2	2019060307:10:32	Bronchitis
19060300260	Female	2	2019070810:07:43	Bronchitis
19090502532	Male	2	2019090519:07:31	Upper respiratory tract infection
18100700679	Male	2	2019090808:09:08	Upper respiratory tract infection
18100700679	Male	2	2019103102:12:56	Upper respiratory tract infection
18100700679	Male	2	2019110421:51:25	Bronchitis
18100700679	Male	2	2019110521:04:25	Bronchitis
19111301998	Male	2	2019113009:36:05	Short stature, not classified elsewhere
19121101502	Female	2	2019121111:35:58	Rhinitis
18032402548	Female	2	2019121709:08:19	Pneumonia
19060300260	Female	2	2019121916:21:18	Bronchitis
17100801375	Male	2	2019122817:51:11	Upper respiratory tract infection
17110700069	Male	3	2019021014:54:55	Tracheitis
19021502071	Female	3	2019051921:12:52	Foot laceration
19060502418	Male	3	2019081920:02:31	Upper respiratory tract infection
17011403030	Female	3	2019102510:50:19	Respiratory infections
17011403030	Female	3	2019102616:29:59	Respiratory infections
19110501440	Male	3	2019110516:07:17	Upper respiratory tract infection
19113000137	Female	3	2019113006:39:43	Mickory inflammation
19122301523	Male	3	2019122311:39:18	Upper respiratory tract infection
19122502109	Female	3	2019122516:16:52	Diarrhea
18110400889	Male	4	2019011815:53:51	Asthma bronchitis
18120500686	Male	4	2019092019:20:20	Bacterial infection
18120500686	Male	4	2019092019:20:20	Upper respiratory tract infection
19031302797	Male	5	2019031321:17:37	Bronchitis
19031502422	Male	5	2019031619:03:53	Pneumonia
17080101625	Female	5	2019032118:21:30	Upper respiratory tract infection
17080101625	Female	5	2019032211:08:56	Respiratory infections
19040901486	Female	5	2019040912:10:16	Respiratory infections
19040901486	Female	5	2019040912:10:16	Tracheitis
17080101625	Female	5	2019050303:15:00	Heat
17080101625	Female	5	2019050303:15:00	Acute pharyngeitis
19051303166	Male	5	2019051321:44:53	Heat
17080101625	Female	5	2019052614:24:10	Diarrhea
19070101861	Male	5	2019070112:01:44	Respiratory infections
19070101861	Male	5	2019070112:01:44	Heat
17080101625	Female	5	2019070912:55:47	Respiratory infections
17120802609	Male	5	2019121909:10:21	Heat
17120802609	Male	5	2019121909:10:21	Tracheitis
17120802609	Male	5	2019121909:10:21	Upper respiratory tract infection
17112600221	Male	6	2019032313:35:53	Acute abscess pachian inflammation
17112600221	Male	6	2019040611:18:09	Acute abscess pachian inflammation
19092901047	Male	7	2019092910:45:04	Dizziness
19032702386	Male	7	2019102313:03:06	Heat
19032702386	Male	7	2019102313:03:06	Bronchitis
19032702386	Male	7	2019102313:03:06	Upper respiratory tract infection
19122500901	Female	7	2019122509:54:20	Upper respiratory tract infection
19122500901	Female	7	2019122509:54:20	Bacterial infection
19121001915	Male	8	2019121014:08:54	Heat
18091301896	Female	8	2019121807:51:20	Upper respiratory tract infection
19123101024	Male	8	2019123111:42:24	Respiratory infections
19041802708	Female	9	2019041820:45:49	Respiratory infections
17060102791	Male	9	2019121017:18:57	Upper respiratory tract infection
18122800185	Male	10	2019010320:07:00	Heat
19063001468	Male	10	2019063014:14:26	Arrhythmia
19120500673	Female	10	2019120508:49:21	Haematuria
19060400333	Female	10	2019121911:04:51	Allergic purpura nephritis
19121602637	Female	11	2019121619:06:58	Respiratory infections
19061001695	Female	12	2019061012:18:18	Particle cell deficiency
19061001695	Female	12	2019061313:42:58	Particle cell deficiency
19061001695	Female	12	2019072109:23:46	Particle cell deficiency
19061001695	Female	12	2019072410:48:29	Particle cell deficiency
19061001695	Female	12	2019080817:12:27	Particle cell deficiency
19051802456	Female	13	2019051900:05:50	Foreign matter in esophagus?
19053002553	Female	13	2019053019:35:49	Blood
19061002495	Female	13	2019061017:26:42	Headache
19061002495	Female	13	2019061017:26:42	Bacterial infection
18032100310	Female	13	2019092813:33:13	Respiratory infections
19101101705	Male	13	2019101114:02:01	Hypertension
19101401958	Female	13	2019101415:00:24	Gastritis
19101401958	Female	13	2019101415:00:24	Allergic shock
17120103096	Male	13	2019112719:16:13	Pain
19120300111	Female	13	2019120306:35:57	Abdominal pain
19031601221	Male	13	2019121713:06:44	Mickory inflammation
19031601221	Male	13	2019121713:06:44	Respiratory infections
19031601221	Male	13	2019121713:06:44	Heat
19122100873	Male	13	2019122109:31:40	Respiratory infections
19010101767	Female	14	2019010119:07:24	Cough
19010201881	Male	14	2019010212:41:43	Intracranial infection?
19010201881	Male	14	2019010212:41:43	Loss of consciousness
19010300338	Female	14	2019010307:35:34	Abdominal pain
19010300338	Female	14	2019010307:35:34	Infectious fever
19010601424	Male	14	2019010613:09:08	Abdominal pain
19011600033	Male	14	2019011602:29:06	Bacterial infection
19011600033	Male	14	2019011602:29:06	Vomiting
19011600033	Male	14	2019011602:29:06	Acute gastritis
19011600033	Male	14	2019011602:29:06	Abdominal pain
19011601018	Female	14	2019011610:19:52	Respiratory infections
19012000809	Female	14	2019012010:42:56	Dizziness
19012502092	Female	14	2019012521:04:56	Respiratory infections
18122300278	Male	14	2019012816:47:34	Anemia
18122300278	Male	14	2019012910:00:42	Anemia
18122300278	Male	14	2019021215:32:41	Anemia of regeneration disorder
19021402613	Female	14	2019021422:48:16	Respiratory infections
18122300278	Male	14	2019021612:53:33	Anemia of regeneration disorder
18122300278	Male	14	2019021711:22:47	Anemia of regeneration disorder
18122300278	Male	14	2019021711:22:47	Anemia
19021900059	Female	14	2019021906:33:51	Bacterial infection
19021900059	Female	14	2019021906:33:51	Respiratory infections
19021900059	Female	14	2019021906:33:51	Heat
19021900059	Female	14	2019022007:47:23	Bronchitis
19021900059	Female	14	2019022007:47:23	Respiratory infections
19021900059	Female	14	2019022007:47:23	Bacterial infection
19021900059	Female	14	2019022108:17:20	Bacterial infection
19021900059	Female	14	2019022108:17:20	Bronchitis
19021900059	Female	14	2019022108:17:20	Respiratory infections
19021900059	Female	14	2019022209:04:03	Bacterial infection
19021900059	Female	14	2019022209:04:03	Respiratory infections
19022500859	Female	14	2019022509:06:54	Diarrhea
19022502725	Female	14	2019022518:09:36	Vomiting
19022502725	Female	14	2019022518:09:36	Bacterial infection
19022502725	Female	14	2019022518:09:36	Diabetic ketoacidosis
19022502725	Female	14	2019022518:09:36	Diabetes
19022502813	Male	14	2019022519:25:50	Foreign matter in esophagus?
19021900059	Female	14	2019022714:14:03	Cough
19030202500	Female	14	2019030219:23:41	Diarrhea
19030202500	Female	14	2019030219:23:41	Intestinal infection
19030202500	Female	14	2019030219:23:41	Gastritis
19030300537	Female	14	2019030309:01:20	Heat
19030403314	Male	14	2019030423:35:57	Chest pain
19021900059	Female	14	2019030819:08:30	Heat
19021900059	Female	14	2019030819:08:30	Diarrhea
19021900059	Female	14	2019030819:08:30	Vomiting
19021900059	Female	14	2019030918:28:37	Bacterial infection
19021900059	Female	14	2019030918:28:37	Gastritis
19021900059	Female	14	2019030918:28:37	Heat
19021900059	Female	14	2019030918:28:37	Diarrhea
19031001603	Male	14	2019031014:50:36	Bleeding of the nose
19021900059	Female	14	2019031115:37:35	Bacterial infection
19021900059	Female	14	2019031115:37:35	Diarrhea
19021900059	Female	14	2019031212:04:13	Heat
19021900059	Female	14	2019031212:04:13	Bacterial infection
19021900059	Female	14	2019031212:04:13	Diarrhea
19021900059	Female	14	2019031309:20:43	Bacterial infection
19021900059	Female	14	2019031309:20:43	Gastritis
19021900059	Female	14	2019031309:20:43	Diarrhea
19031701519	Male	14	2019031714:00:03	Intestinal infection
19031701519	Male	14	2019031714:00:03	Abdominal pain
19031800048	Female	14	2019031802:50:43	Influenza-like pharyngetis of known viruses
19031800048	Female	14	2019031802:50:43	Heat
19031802181	Female	14	2019031814:41:23	Heat
19031802853	Male	14	2019031817:17:19	Respiratory infections
19031802853	Male	14	2019031817:17:19	Cough
19031901801	Female	14	2019031913:36:41	Diarrhea
19031901801	Female	14	2019031913:36:41	Vomiting
19032102337	Male	14	2019032118:00:28	Bacterial infection
19032102337	Male	14	2019032118:00:28	Diarrhea
19032102337	Male	14	2019032118:00:28	Gastritis
19032501681	Female	14	2019032511:39:34	Abdominal pain
18060700693	Female	14	2019032812:50:28	Bacterial infection
18060700693	Female	14	2019032812:50:28	Be palpitations
19033001933	Male	14	2019033015:01:01	Respiratory infections
19033001933	Male	14	2019033015:01:01	Bacterial infection
19033001933	Male	14	2019033015:01:01	Heat
19033002469	Female	14	2019033022:21:07	Pneumonia
19033100035	Female	14	2019033105:05:12	Asthma takes medication
161230058380	Female	14	2019040108:23:39	Respiratory infections
161230058380	Female	14	2019040108:23:39	Pneumonia
19040102199	Male	14	2019040114:08:19	Bronchitis
19040102199	Male	14	2019040114:08:19	Respiratory infections
19040200030	Male	14	2019040204:22:58	Influenza
19040200030	Male	14	2019040204:22:58	Respiratory infections
161230058380	Female	14	2019040208:38:34	Pneumonia
19031701519	Male	14	2019040209:28:08	Respiratory infections
18022801292	Male	14	2019040313:26:42	Bronchitis
161230058380	Female	14	2019040315:24:23	Pneumonia
161230032757	Male	14	2019040414:16:27	Heat
161230058380	Female	14	2019040414:41:12	Pneumonia
161230058380	Female	14	2019040507:53:54	Pneumonia
161230058380	Female	14	2019040608:09:51	Pneumonia
17040800717	Male	14	2019040612:04:54	Bronchitis
19040602537	Female	14	2019040620:04:56	Bronchitis
19040602737	Male	14	2019040623:22:26	Heat
19040700021	Female	14	2019040701:59:23	Bacterial infection
19040700021	Female	14	2019040701:59:23	Heat
161230058380	Female	14	2019040709:28:16	Pneumonia
17072500850	Female	14	2019040714:37:05	Bronchitis
17072500850	Female	14	2019040714:37:05	Respiratory infections
17072500850	Female	14	2019040714:37:05	Pulmonary infection
19040701979	Female	14	2019040719:34:04	Nausea and vomiting
19040701979	Female	14	2019040719:34:04	Headache
19040701979	Female	14	2019040719:34:04	Ketosis
19040701979	Female	14	2019040719:34:04	Gastritis
161230058380	Female	14	2019040814:48:20	Pneumonia
17021901075	Female	14	2019040821:21:22	Chest pain
161230058380	Female	14	2019040915:11:50	Pneumonia
161230058380	Female	14	2019041014:30:20	Pneumonia
19041302366	Female	14	2019041318:33:17	Heat
19041302366	Female	14	2019041318:33:17	Viral infection
19041302366	Female	14	2019041418:11:34	Viral infection
19041302366	Female	14	2019041418:11:34	Heat
19041402223	Female	14	2019041422:37:18	Chest stuffy
19041501111	Female	14	2019041509:32:44	Bacterial infection
19041501111	Female	14	2019041509:32:44	Abdominal pain
19041501169	Male	14	2019041509:42:55	Upper respiratory tract infection
19041501169	Male	14	2019041509:42:55	Cough
19041302366	Female	14	2019041518:12:07	Heat
19041302366	Female	14	2019041518:12:07	Viral infection
19041601562	Male	14	2019041611:23:43	Chest pain
19041302366	Female	14	2019041618:43:06	Heat
19041302366	Female	14	2019041618:43:06	Viral infection
19041701825	Male	14	2019041712:41:23	Heat
19041701825	Male	14	2019041712:41:23	Respiratory infections
19041800865	Male	14	2019041809:15:50	Acute gastritis
19041800865	Male	14	2019041809:15:50	Nausea and vomiting
19041701825	Male	14	2019041907:52:24	Mickory inflammation
19041701825	Male	14	2019041907:52:24	Heat
19041701825	Male	14	2019042008:16:20	Mickory inflammation
19042100250	Female	14	2019042107:21:05	Lackluster
19031701519	Male	14	2019042218:17:47	Respiratory infections
19031701519	Male	14	2019042414:29:41	Heat
19031701519	Male	14	2019042414:29:41	Respiratory infections
19031701519	Male	14	2019042414:29:41	Bronchitis
19031701519	Male	14	2019042414:29:41	Cough
19031701519	Male	14	2019042514:16:37	Respiratory infections
19031701519	Male	14	2019042514:16:37	Bronchitis
19042502296	Male	14	2019042517:34:45	Thrombocytopenia
19042601689	Male	14	2019042614:22:40	Viral infection
19042601689	Male	14	2019042614:22:40	Bronchitis
19031701519	Male	14	2019042619:26:00	Respiratory infections
19031701519	Male	14	2019042619:26:00	Bronchitis
19042601689	Male	14	2019042709:04:43	Viral infection
19042601689	Male	14	2019042709:04:43	Bronchitis
19042701791	Female	14	2019042715:27:54	Bronchitis
19031701519	Male	14	2019042718:16:41	Respiratory infections
19031701519	Male	14	2019042718:16:41	Bronchitis
19041800865	Male	14	2019042801:31:33	Acute gastritis
19041800865	Male	14	2019042801:31:33	Abdominal pain
19042800410	Male	14	2019042809:08:38	Headache
19031701519	Male	14	2019042819:24:58	Respiratory infections
19031701519	Male	14	2019042819:24:58	Bronchitis
19021900059	Female	14	2019043006:09:12	Bronchitis
19021900059	Female	14	2019043006:09:12	Cough
19021900059	Female	14	2019043006:09:12	Asthma
19042800878	Male	14	2019043009:50:28	Pneumonia
19042800878	Male	14	2019050110:27:11	Gastritis
19042800878	Male	14	2019050110:27:11	Pneumonia
19042800878	Male	14	2019050110:27:11	Allergic dermatitis
19042800878	Male	14	2019050210:29:47	Pneumonia
19042800878	Male	14	2019050309:28:45	Pneumonia
19050302296	Male	14	2019050320:58:09	Heat
19042800878	Male	14	2019050407:57:06	Pneumonia
19042800878	Male	14	2019050409:55:40	Pneumonia
19042800878	Male	14	2019050508:59:00	Polygonal erythema
19042800878	Male	14	2019050508:59:00	Pneumonia
19042800878	Male	14	2019050510:05:20	Pneumonia
19050502359	Male	14	2019050520:22:56	Respiratory infections
19042800878	Male	14	2019050610:04:02	Polygonal erythema
19042800878	Male	14	2019050610:04:02	Pneumonia
19050603338	Male	14	2019050623:48:07	Heat
19050603338	Male	14	2019050623:48:07	Respiratory infections
19050700027	Male	14	2019050701:43:19	Vomiting
19050700027	Male	14	2019050701:43:19	Acute gastric mucosal disease
19042800878	Male	14	2019051309:27:33	Pneumonia
19051302869	Male	14	2019051318:30:16	Respiratory infections
19051302869	Male	14	2019051414:11:14	Respiratory infections
19051302869	Male	14	2019051513:35:38	Respiratory infections
19051502686	Male	14	2019051517:46:07	Respiratory infections
19051302869	Male	14	2019051613:32:29	Respiratory infections
19051602053	Female	14	2019051615:12:38	Lackluster
19051602053	Female	14	2019051615:12:38	Heat
19051700347	Male	14	2019051712:02:02	Bacterial infection
19051700347	Male	14	2019051712:02:02	Chest pain
19051302869	Male	14	2019051713:43:46	Bronchitis
19051801733	Male	14	2019051814:13:59	Gastritis
19051801733	Male	14	2019051814:13:59	Abdominal pain
19051801733	Male	14	2019051814:13:59	Heat
19051802157	Female	14	2019051818:19:37	Bacterial infection
19051802157	Female	14	2019051818:19:37	Heat
19051802157	Female	14	2019051818:19:37	Upper respiratory tract infection
17091602663	Male	14	2019052113:50:03	Bacterial infection
17091602663	Male	14	2019052113:50:03	Abdominal pain
17091602663	Male	14	2019052113:50:03	Dizziness
19052202591	Female	14	2019052219:28:10	Cough
19052202665	Female	14	2019052220:13:01	Acute abscess pachian inflammation
19052202665	Female	14	2019052220:13:01	Heat
19052202665	Female	14	2019052315:45:59	Heat
19052202665	Female	14	2019052315:45:59	Acute abscess pachian inflammation
19052202665	Female	14	2019052412:49:44	Acute abscess pachian inflammation
18040301648	Male	14	2019052423:49:56	Abdominal pain
19052901665	Female	14	2019052912:55:33	Gastritis
19052901665	Female	14	2019052912:55:33	Bacterial infection
19052901665	Female	14	2019052912:55:33	Abdominal pain
19060500920	Female	14	2019060510:56:17	Chest pain
19060600037	Male	14	2019060604:27:36	Heat
19061000024	Male	14	2019061001:34:18	Digestive bleeding?
19061000024	Male	14	2019061001:34:18	Alcohol poisoning
19061202586	Female	14	2019061219:50:54	Abdominal pain
18012200085	Female	14	2019061515:08:22	Upper respiratory tract infection
18071301250	Female	14	2019061616:51:29	Upper respiratory tract infection
19061702716	Male	14	2019061718:57:32	Abdominal pain
19061702716	Male	14	2019061718:57:32	Intestinal infection?
19061702732	Female	14	2019061719:12:04	Respiratory infections
19061702835	Male	14	2019061720:24:58	Gastritis
19061702835	Male	14	2019061720:24:58	Alcohol poisoning
19061900897	Female	14	2019061909:42:48	Cough
19061900897	Female	14	2019061909:42:48	Respiratory infections
19062101119	Female	14	2019062110:17:22	Be palpitations
19062101119	Female	14	2019062110:17:22	Lackluster
18091301770	Female	14	2019062220:37:02	Respiratory infections
19011401143	Male	14	2019062414:47:04	Bloating
17032300312	Female	14	2019062417:01:08	Respiratory infections
17032300312	Female	14	2019062417:01:08	Heat
19062500639	Male	14	2019062508:25:50	Gastritis
19062500639	Male	14	2019062508:25:50	Drug poisoning
19062502555	Female	14	2019062519:15:09	Cough
19062502555	Female	14	2019062519:15:09	Asthma bronchitis
19070202825	Male	14	2019070220:39:08	Be palpitations
17081101510	Male	14	2019070409:47:24	Headache
17081101510	Male	14	2019070413:16:08	Bacterial infection
17081101510	Male	14	2019070413:16:08	Abdominal pain
17081101510	Male	14	2019070413:16:08	Heat
17081101510	Male	14	2019070413:16:08	Gastritis
19070600866	Female	14	2019070609:42:58	Abdominal pain
19070600866	Female	14	2019070609:42:58	Heat
19070701734	Male	14	2019070718:08:55	Bacterial infection
19070701734	Male	14	2019070718:08:55	Bronchitis
19070701734	Male	14	2019070718:08:55	Cough
19071503229	Female	14	2019071521:07:29	Acute gastritis
19071503229	Female	14	2019071521:07:29	Poisoning
19071602978	Male	14	2019071621:24:36	Syncope
19071603002	Female	14	2019071621:33:13	Intestinal infection
19071603002	Female	14	2019071621:33:13	Urinary tract infection
19071603002	Female	14	2019071621:33:13	Nausea and vomiting
19071603002	Female	14	2019071621:33:13	Bacterial infection
19071603002	Female	14	2019071621:33:13	Gastritis
19012102052	Female	14	2019072010:05:57	Bacterial infection
19072100318	Male	14	2019072107:45:35	Respiratory infections
19072100318	Male	14	2019072107:45:35	Heat
19072400534	Male	14	2019072408:07:26	Pneumonia
19072401685	Male	14	2019072413:09:59	Bacterial infection
19072401685	Male	14	2019072413:09:59	Anemia
19072401685	Male	14	2019072413:09:59	Thrombocytopenia
19072401685	Male	14	2019072413:09:59	Particle cell deficiency
19072401685	Male	14	2019072413:09:59	Vomiting
19072401685	Male	14	2019072413:09:59	Gastric mucosal lesions
19072401685	Male	14	2019072413:09:59	Whole blood cell reduction
19072402515	Male	14	2019072419:24:35	Respiratory infections
19072400534	Male	14	2019072508:05:01	Pneumonia
19072502680	Male	14	2019072521:46:38	Bacterial infection
19072502680	Male	14	2019072521:46:38	Heat
19070902862	Male	14	2019072522:09:21	Respiratory infections
19070902862	Male	14	2019072522:09:21	Lackluster
19072400534	Male	14	2019072608:08:43	Pneumonia
19072601501	Male	14	2019072612:14:51	Allergic reactions
19072602155	Female	14	2019072616:42:35	Chest pain
19072602262	Male	14	2019072618:06:11	Heat
19072602262	Male	14	2019072618:06:11	Bacterial infection
17103101968	Female	14	2019080107:15:19	Diarrhea
17103101968	Female	14	2019080107:15:19	Abdominal pain
17103101968	Female	14	2019080107:15:19	Bacterial infection
17103101968	Female	14	2019080107:15:19	Gastritis
17103101968	Female	14	2019080107:15:19	Vomiting
19080702234	Male	14	2019080713:21:49	Headache
19080702234	Male	14	2019080713:21:49	Bacterial infection
18060300861	Male	14	2019081007:43:53	Abdominal pain
19081100558	Male	14	2019081109:21:16	Diarrhea
19081502364	Male	14	2019081516:51:32	Allergic dermatitis
19081502364	Male	14	2019081516:51:32	Vomiting
19051302871	Female	14	2019081613:49:07	Lackluster
18022801292	Male	14	2019081710:40:45	Respiratory infections
19081701191	Male	14	2019081711:08:42	Chest pain
17053102915	Male	14	2019081822:40:24	Lymph node inflammation
17050302303	Male	14	2019082720:37:59	Chest pain
18060801462	Female	14	2019082909:37:57	Gastrointestinal disturbances
18060801462	Female	14	2019082909:37:57	Abdominal pain
19083002472	Male	14	2019083020:10:13	Bronchial asthma?
19083002472	Male	14	2019083020:10:13	Chest stuffy
18110500021	Female	14	2019083103:43:48	Mickory inflammation
18110500021	Female	14	2019083103:43:48	Bacterial infection
19083101503	Male	14	2019083111:36:34	Asthma?
19082001412	Male	14	2019083120:34:35	Acute pancreatitis?
19082001412	Male	14	2019083120:34:35	Bloating
19082001412	Male	14	2019083120:34:35	Bacterial infection
19082001412	Male	14	2019083120:34:35	Lymph node inflammation
19090101070	Female	14	2019090110:32:58	Gastritis
19090200036	Male	14	2019090203:34:09	Chest stuffy
19090200036	Male	14	2019090203:34:09	Chest pain
18121601968	Male	14	2019090315:45:09	Upper respiratory tract infection
19090402591	Male	14	2019090419:37:44	Tracheitis
19090501028	Female	14	2019090509:44:29	Be palpitations
19090501028	Female	14	2019090509:44:29	Lackluster
19090601677	Female	14	2019090613:50:21	Heat
19090601677	Female	14	2019090613:50:21	Cough
19090601677	Female	14	2019090613:50:21	Bacterial infection
19090601677	Female	14	2019090613:50:21	Bleeding of the nose
18121601968	Male	14	2019090616:45:30	Bronchitis
18121601968	Male	14	2019090616:45:30	Upper respiratory tract infection
18101301890	Female	14	2019090720:25:54	Respiratory infections
18101301890	Female	14	2019090720:25:54	Bacterial infection
19090702574	Female	14	2019090722:51:37	Intestinal bacterial group disorders
19090702574	Female	14	2019090722:51:37	Intestinal infection
19090801588	Female	14	2019090815:45:02	Hypertension
19072001114	Male	14	2019091013:54:35	Respiratory infections
19091101308	Male	14	2019091111:39:50	Respiratory infections
19091101703	Female	14	2019091114:21:40	Respiratory infections
19091101703	Female	14	2019091114:21:40	Heat
19091102075	Female	14	2019091116:59:29	Respiratory infections
19091102075	Female	14	2019091116:59:29	Bacterial infection
16123186923	Female	14	2019091200:39:22	Asthma
16123186923	Female	14	2019091200:39:22	Chest stuffy
19091200066	Female	14	2019091206:08:02	Heat
17112402903	Male	14	2019091221:05:27	Breathing
17112402903	Male	14	2019091221:05:27	Bronchitis
19091300277	Female	14	2019091308:13:20	Anemia
19050801877	Female	14	2019091308:41:10	Bronchitis
19050801877	Female	14	2019091308:41:10	Bacterial infection
18111200054	Female	14	2019091311:05:36	Bacterial infection
18111200054	Female	14	2019091311:05:36	Heat
18111200054	Female	14	2019091311:05:36	Viral infection
18111200054	Female	14	2019091311:05:36	Respiratory infections
19091400809	Female	14	2019091409:20:14	Chest stuffy
18111200054	Female	14	2019091411:07:36	Bacterial infection
18111200054	Female	14	2019091411:07:36	Viral infection
18111200054	Female	14	2019091411:07:36	Respiratory infections
19091401693	Male	14	2019091414:23:23	Respiratory infections
19091401693	Male	14	2019091414:23:23	Heat
19091401693	Male	14	2019091414:23:23	Bacterial infection
19091401083	Female	14	2019091417:45:36	Bronchitis
19091401083	Female	14	2019091417:45:36	Bacterial infection
19091500029	Male	14	2019091502:21:59	Chest stuffy
18111200054	Female	14	2019091510:06:36	Respiratory infections
18111200054	Female	14	2019091607:15:52	Respiratory infections
18111200054	Female	14	2019091607:15:52	Bacterial infection
19091600320	Female	14	2019091607:27:24	Bacterial infection
19091600320	Female	14	2019091607:27:24	Heat
19091602333	Female	14	2019091615:21:33	Be palpitations
17112402903	Male	14	2019091620:45:43	Bronchitis
19091702752	Female	14	2019091720:21:58	Abdominal pain
19091702752	Female	14	2019091720:21:58	Respiratory infections
19032901875	Male	14	2019091820:21:17	Bacterial infection
19032901875	Male	14	2019091820:21:17	Infectious fever
19050402272	Female	14	2019091917:19:48	Bacterial infection
19050402272	Female	14	2019091917:19:48	Ketosis
19050402272	Female	14	2019091917:19:48	Nausea and vomiting
19091902402	Female	14	2019091918:49:52	Dizziness
19091902402	Female	14	2019091918:49:52	Ketosis
19091902402	Female	14	2019091918:49:52	Disgusting
19092001980	Male	14	2019092015:50:21	Abdominal pain
19092002170	Female	14	2019092017:01:48	Diarrhea
19092002170	Female	14	2019092017:01:48	Abdominal pain
19092002369	Female	14	2019092019:44:39	Chest stuffy
19091700712	Female	14	2019092108:11:49	Lackluster
19091600320	Female	14	2019092209:15:18	Heat
19091600320	Female	14	2019092209:15:18	Bacterial infection
19092602178	Female	14	2019092617:59:05	Damage
19020900589	Male	14	2019092714:21:43	Bloating
19020900589	Male	14	2019092714:21:43	Abdominal pain
19092701598	Female	14	2019092714:31:56	Heat
19092701742	Female	14	2019092715:41:05	Bacterial infection
19092701742	Female	14	2019092715:41:05	Respiratory infections
19092701742	Female	14	2019092715:41:05	Heat
19092701598	Female	14	2019092716:08:43	Heat
19092701986	Female	14	2019092718:40:21	Hives
19092701986	Female	14	2019092718:40:21	Pneumonia
19092701986	Female	14	2019092718:41:08	Pneumonia
19092701986	Female	14	2019092718:41:08	Respiratory infections
19092800611	Female	14	2019092809:05:38	Eating disorders
19092801434	Male	14	2019092814:19:16	Bronchitis
19092801434	Male	14	2019092814:19:16	Cough
17120100624	Male	14	2019092818:02:21	Heat
19093002124	Male	14	2019093018:54:49	Bacterial infection
19093002124	Male	14	2019093018:54:49	Haematuria
19093002238	Female	14	2019093020:20:35	Bacterial infection
19093002238	Female	14	2019093020:20:35	Gastritis
19093002238	Female	14	2019093020:20:35	Nausea and vomiting
19093002238	Female	14	2019093020:20:35	Infectious fever
19100400015	Female	14	2019100400:25:20	Respiratory infections
19100400015	Female	14	2019100400:25:20	Heat
161230020262	Male	14	2019100408:18:49	Respiratory infections
19100401536	Male	14	2019100411:57:45	Heat
19100401536	Male	14	2019100411:57:45	Chest pain
19021900059	Female	14	2019100506:54:51	Asthma
19021900059	Female	14	2019100506:54:51	Cough
19100600931	Female	14	2019100611:06:06	Bacterial infection
19100600931	Female	14	2019100611:06:06	Gastritis
19100600931	Female	14	2019100611:06:06	Abdominal pain
19100600931	Female	14	2019100611:06:06	Diarrhea
19100701167	Female	14	2019100710:51:47	Gastritis
19100701167	Female	14	2019100710:51:47	Nausea and vomiting
19100701167	Female	14	2019100710:51:47	Bacterial infection
19101200362	Female	14	2019101207:54:16	Chest pain
19101300048	Female	14	2019101306:41:21	Chest stuffy
18091901666	Female	14	2019101320:37:10	Chest stuffy
18091901666	Female	14	2019101320:37:10	Bronchitis
18091901666	Female	14	2019101320:37:10	Respiratory infections
19101400120	Female	14	2019101406:53:06	Pain
17120403676	Female	14	2019101416:41:23	Bacterial infection
17120403676	Female	14	2019101416:41:23	Acute sore throat
17120403676	Female	14	2019101516:31:05	Bacterial infection
17120403676	Female	14	2019101516:31:05	Acute sore throat
19101602412	Female	14	2019101621:50:43	Infectious fever
161230092886	Male	14	2019101801:26:01	Bacterial infection
161230092886	Male	14	2019101801:26:01	Acute gastritis
161230092886	Male	14	2019101801:26:01	Ketosis
161230092886	Male	14	2019101801:26:01	Acute gastric mucosal disease
161230092886	Male	14	2019101801:26:01	Nausea and vomiting
19101802134	Male	14	2019101816:34:24	Heat
19101802134	Male	14	2019101816:34:24	White cell reduction
19101802134	Male	14	2019101816:34:24	Respiratory infections
19101900047	Male	14	2019101906:44:35	Abdominal pain
19101801339	Male	14	2019101922:49:23	White cell reduction
19101801339	Male	14	2019101922:49:23	Heat
19101801339	Male	14	2019101922:49:23	Viral infection
19101801339	Male	14	2019102019:51:37	Viral infection
19101801339	Male	14	2019102019:51:37	White cell reduction
19101801339	Male	14	2019102019:51:37	Heat
19102101956	Male	14	2019102114:57:52	Vomiting
19102101956	Male	14	2019102114:57:52	Diarrhea
19102101956	Male	14	2019102114:57:52	Abdominal pain
19091500029	Male	14	2019102120:28:32	Abdominal pain
19102102785	Male	14	2019102121:12:48	Gastritis
19102102785	Male	14	2019102121:12:48	Abdominal pain
19102201395	Male	14	2019102212:16:14	Abdominal pain
161230058346	Male	14	2019102410:42:55	Bacterial infection
161230058346	Male	14	2019102410:42:55	Bronchitis
19102401467	Female	14	2019102412:41:10	Pneumonia
161230058346	Male	14	2019102508:37:57	Bacterial infection
161230058346	Male	14	2019102508:37:57	Bronchitis
19102501571	Male	14	2019102513:40:15	Back pain
19102502110	Male	14	2019102517:31:05	Respiratory infections
161230058346	Male	14	2019102608:37:12	Bronchitis
161230058346	Male	14	2019102608:37:12	Bacterial infection
161230058346	Male	14	2019102709:15:02	Bacterial infection
161230058346	Male	14	2019102709:15:02	Bronchitis
19021900059	Female	14	2019102710:27:42	Asthma
19021900059	Female	14	2019102710:27:42	Bronchitis
19102701322	Male	14	2019102714:41:13	Bacterial infection
19102701322	Male	14	2019102714:41:13	Infectious fever
19102802405	Male	14	2019102817:44:08	Foreign material in the digestive tract
19102902258	Male	14	2019102917:59:05	Heat
19102902258	Male	14	2019102917:59:05	Asthma?
19102902258	Male	14	2019102917:59:05	Bacterial infection
19102902280	Female	14	2019102918:16:28	Respiratory infections
19102902280	Female	14	2019102918:16:28	Bacterial infection
19102902258	Male	14	2019103018:18:09	Bacterial infection
19102902258	Male	14	2019103018:18:09	Heat
19103002348	Male	14	2019103018:45:38	Gastritis
19103002348	Male	14	2019103018:45:38	Vomiting
19103100607	Male	14	2019103108:45:46	Viral infection
19103100607	Male	14	2019103108:45:46	White cell reduction
19103100607	Male	14	2019103108:45:46	Heat
19103100607	Male	14	2019103108:45:46	Cough
19110202045	Male	14	2019110216:23:50	Respiratory infections
19110300239	Male	14	2019110307:42:19	Diarrhea
19110300975	Male	14	2019110311:18:11	Cough
17070500106	Female	14	2019110319:02:04	Heat
17070500106	Female	14	2019110319:02:04	Viral infection
17070500106	Female	14	2019110319:02:04	Headache
17070500106	Female	14	2019110319:02:04	Lymph node enlargement
19032102310	Female	14	2019110707:48:29	Foreign bodies in the air duct?
19032102310	Female	14	2019110707:48:29	Respiratory infections
19110801418	Female	14	2019110812:46:54	Bacterial infection
19110801418	Female	14	2019110812:46:54	Abdominal pain
18033100242	Male	14	2019110818:47:37	Upper respiratory tract infection
19110802304	Male	14	2019110820:46:05	Respiratory infections
18081801794	Male	14	2019110906:38:37	Mickory inflammation
18033100242	Male	14	2019110909:09:19	Upper respiratory tract infection
19110900692	Female	14	2019110909:15:53	Pneumonia
19110801495	Male	14	2019110910:39:43	Chest pain
18033100242	Male	14	2019111008:15:16	Respiratory infections
18033100242	Male	14	2019111008:15:16	Upper respiratory tract infection
18033100242	Male	14	2019111108:45:29	Upper respiratory tract infection
18033100242	Male	14	2019111108:45:29	Respiratory infections
19111102885	Female	14	2019111122:42:48	Bacterial infection
19111102885	Female	14	2019111122:42:48	Pulmonary infection
19111102885	Female	14	2019111122:42:48	Breathing bronchitis
18033100242	Male	14	2019111209:32:39	Respiratory infections
19111200954	Male	14	2019111210:05:52	Respiratory infections
19111200954	Male	14	2019111210:05:52	Chest stuffy
19111202328	Female	14	2019111217:26:35	Pneumonia
19111301544	Male	14	2019111313:08:27	Vague awareness
19111301706	Male	14	2019111314:02:18	Chest pain
19111202328	Female	14	2019111320:32:56	Pneumonia
18033100242	Male	14	2019111407:25:38	Respiratory infections
19111202328	Female	14	2019111420:33:11	Pneumonia
19111202328	Female	14	2019111520:54:00	Pneumonia
19111202328	Female	14	2019111620:18:10	Pneumonia
19111700625	Male	14	2019111709:36:35	Arrhythmia?
19111701339	Female	14	2019111714:37:52	Urinary tract infection
19111202328	Female	14	2019111720:24:13	Pneumonia
19111801690	Female	14	2019111813:16:10	Diarrhea
19111801690	Female	14	2019111813:16:10	Abdominal pain
18032801103	Female	14	2019111821:32:14	Abdominal pain
19111202328	Female	14	2019111821:59:02	Pneumonia
19111900823	Male	14	2019111909:42:25	Arrhythmia
19111900823	Male	14	2019111909:42:25	Be palpitations
19111902193	Female	14	2019111916:44:44	Anemia
19111902193	Female	14	2019111916:44:44	Digestive bleeding
19111902318	Male	14	2019111918:35:39	Respiratory infections
19111902318	Male	14	2019111918:35:39	Asthma
19111902330	Male	14	2019111918:44:05	Heat
19111902330	Male	14	2019111918:44:05	Pneumonia
18011300878	Female	14	2019112021:01:59	Respiratory infections
18011300878	Female	14	2019112021:01:59	Heat
19112101164	Female	14	2019112111:38:55	Anemia
19112101617	Female	14	2019112113:25:04	Gastric mucosal lesions
19112101617	Female	14	2019112113:25:04	Abdominal pain
18111800483	Female	14	2019112222:26:06	Chest stuffy
19112300016	Female	14	2019112300:49:34	Gastritis
19112300016	Female	14	2019112300:49:34	Abdominal pain
19112302414	Female	14	2019112320:54:47	Abdominal pain
19112500003	Female	14	2019112500:12:18	Respiratory infections
19112500003	Female	14	2019112500:12:18	Heat
19112502451	Male	14	2019112516:51:01	Chest pain
19112601655	Female	14	2019112613:27:01	Bacterial infection
19112601655	Female	14	2019112613:27:01	Pneumonia
19112601655	Female	14	2019112613:27:01	Cough
19112602241	Male	14	2019112616:49:30	Respiratory infections
19112602304	Female	14	2019112616:57:48	Respiratory infections
18062901339	Male	14	2019112617:36:59	Infectious fever
19112602457	Female	14	2019112618:43:42	Respiratory infections
19112602540	Female	14	2019112619:50:47	Abdominal pain
19112602627	Female	14	2019112620:47:04	Respiratory infections
19112602627	Female	14	2019112620:47:04	Bacterial infection
19112702275	Female	14	2019112716:15:50	Cough
19112702275	Female	14	2019112716:15:50	Respiratory infections
19112702275	Female	14	2019112716:15:50	Bacterial infection
19112702422	Female	14	2019112717:41:19	Respiratory infections
19112702422	Female	14	2019112816:32:12	Cough
19112702422	Female	14	2019112816:32:12	Respiratory infections
19112802273	Female	14	2019112816:33:02	Respiratory infections
19112901144	Female	14	2019112910:43:16	Infectious fever
19112901144	Female	14	2019112910:43:16	Cough variability asthma?
18092600042	Female	14	2019113008:12:45	Anemia
18092600042	Female	14	2019113008:12:45	Respiratory infections
19113001944	Female	14	2019113015:40:18	Bronchitis
19113001944	Female	14	2019113015:40:18	Bacterial infection
17121803617	Female	14	2019113019:22:23	Respiratory infections
18071300859	Female	14	2019120111:03:33	Respiratory infections
18071300859	Female	14	2019120111:03:33	Heat
19120101482	Female	14	2019120115:02:59	Heat
18071300859	Female	14	2019120211:22:18	Respiratory infections
17051201851	Female	14	2019120213:56:37	Respiratory infections
17051201851	Female	14	2019120213:56:37	Heat
17112900109	Male	14	2019120223:10:28	Chest stuffy
19120300360	Female	14	2019120307:46:58	Bacterial infection
19120300360	Female	14	2019120307:46:58	Bronchitis
19112502459	Female	14	2019120310:51:11	Be palpitations
18071300859	Female	14	2019120311:36:24	Bacterial infection
18071300859	Female	14	2019120311:36:24	Respiratory infections
19120301902	Female	14	2019120314:14:36	Abdominal pain
17121803617	Female	14	2019120317:49:57	Respiratory infections
19120401551	Female	14	2019120412:08:05	Abdominal pain
18071300859	Female	14	2019120413:17:38	Respiratory infections
19120401918	Female	14	2019120414:05:22	Respiratory infections
19120402484	Female	14	2019120417:07:41	Bronchitis
19120402484	Female	14	2019120417:07:41	Heat
19120402484	Female	14	2019120417:07:41	Bacterial infection
19120500324	Female	14	2019120507:26:40	Respiratory infections
19120402484	Female	14	2019120509:59:49	Bacterial infection
19120402484	Female	14	2019120509:59:49	Bronchitis
18110302128	Female	14	2019120510:24:32	Respiratory infections
18110302128	Female	14	2019120510:24:32	Heat
18071300859	Female	14	2019120510:26:09	Respiratory infections
19120500630	Male	14	2019120511:25:00	Respiratory infections
19120501743	Female	14	2019120513:36:29	Respiratory infections
17010267453	Male	14	2019120515:52:04	Respiratory infections
17112402903	Male	14	2019120516:42:58	Bacterial infection
17112402903	Male	14	2019120516:42:58	Heat
17010801604	Male	14	2019120517:38:02	Bacterial infection
17010801604	Male	14	2019120517:38:02	Respiratory infections
17010801604	Male	14	2019120517:38:02	Heat
18020802052	Female	14	2019120519:40:37	Respiratory infections
19120502691	Male	14	2019120520:02:52	Bronchitis
19120402484	Female	14	2019120608:22:33	Bronchitis
19120402484	Female	14	2019120608:22:33	Bacterial infection
19120601157	Male	14	2019120610:18:44	Respiratory infections
18071300859	Female	14	2019120613:04:02	Respiratory infections
19120602188	Female	14	2019120615:15:31	Abdominal pain
19120602188	Female	14	2019120615:15:31	Gastritis
19120602188	Female	14	2019120615:15:31	Heat
19120602188	Female	14	2019120615:15:31	Diarrhea
17041600397	Female	14	2019120618:19:36	Viral infection
17041600397	Female	14	2019120618:19:36	Respiratory infections
17041600397	Female	14	2019120618:19:36	Heat
17092003022	Male	14	2019120710:51:25	Bacterial infection
17092003022	Male	14	2019120710:51:25	Respiratory infections
17092003022	Male	14	2019120710:51:25	Viral infection
17092003022	Male	14	2019120710:51:25	Heat
17041600397	Female	14	2019120713:04:44	Viral infection
17041600397	Female	14	2019120713:04:44	Respiratory infections
17041600397	Female	14	2019120713:04:44	Heat
19120701686	Female	14	2019120713:17:49	Intestinal infection
19120701686	Female	14	2019120713:17:49	Bacterial infection
19120701686	Female	14	2019120713:17:49	Gastritis
19120701686	Female	14	2019120713:17:49	Diarrhea
18071300859	Female	14	2019120714:05:43	Respiratory infections
19120701972	Female	14	2019120714:54:14	Respiratory infections
18092600042	Female	14	2019120719:48:09	Anemia
18092600042	Female	14	2019120719:48:09	Cough
18092600042	Female	14	2019120719:48:09	Respiratory infections
19120800042	Female	14	2019120802:39:08	Chest stuffy
19120800042	Female	14	2019120802:39:08	Limb numb
19120800042	Female	14	2019120802:39:08	Dizziness
16123148774	Female	14	2019120810:36:08	Gastritis
16123148774	Female	14	2019120810:36:08	Abdominal pain
18071300859	Female	14	2019120812:05:46	Respiratory infections
19120801363	Male	14	2019120813:09:37	Chest stuffy
19120801363	Male	14	2019120813:09:37	Heat
17092003022	Male	14	2019120813:17:43	Respiratory infections
17092003022	Male	14	2019120813:17:43	Heat
17041600397	Female	14	2019120813:23:34	Viral infection
17041600397	Female	14	2019120813:23:34	Respiratory infections
19120801515	Male	14	2019120814:18:03	Respiratory infections
19120801515	Male	14	2019120814:18:03	Bronchitis
19120801733	Female	14	2019120816:07:39	Respiratory infections
19120801733	Female	14	2019120816:07:39	Bacterial infection
17120100348	Male	14	2019120818:57:05	Bacterial infection
17120100348	Male	14	2019120818:57:05	Respiratory infections
17120100348	Male	14	2019120818:57:05	Heat
19120802317	Male	14	2019120822:22:36	Diarrhea
19050500909	Female	14	2019120900:27:12	Heat
19050500909	Female	14	2019120900:27:12	Respiratory infections
18073000095	Female	14	2019120908:27:20	Respiratory infections
18073000095	Female	14	2019120908:27:20	Heat
19120900862	Male	14	2019120909:12:10	Respiratory infections
19120900862	Male	14	2019120909:12:10	Bacterial infection
19120902548	Male	14	2019120915:59:36	Heat
19120902548	Male	14	2019120915:59:36	Bronchitis
19120902548	Male	14	2019120915:59:36	Respiratory infections
19120902624	Female	14	2019120916:24:51	Respiratory infections
19120902624	Female	14	2019120916:24:51	Heat
19091900177	Male	14	2019120917:12:24	Heat
16123142255	Female	14	2019120918:41:58	Respiratory infections
16123142255	Female	14	2019120918:41:58	Heat
17120100348	Male	14	2019120919:46:57	Heat
17120100348	Male	14	2019120919:46:57	Respiratory infections
17120100348	Male	14	2019120919:46:57	Bacterial infection
19120903047	Female	14	2019120919:47:40	Respiratory infections
19120903047	Female	14	2019120919:47:40	Heat
19121000784	Male	14	2019121009:01:21	Respiratory infections
19121000784	Male	14	2019121009:01:21	Heat
18073000095	Female	14	2019121011:45:14	Respiratory infections
18073000095	Female	14	2019121011:45:14	Heat
17120100348	Male	14	2019121016:22:56	Respiratory infections
17120100348	Male	14	2019121016:22:56	Bacterial infection
19121002323	Female	14	2019121016:26:41	Respiratory infections
19092701598	Female	14	2019121021:11:43	Heat
19121002922	Male	14	2019121022:54:15	Bacterial infection
19121002922	Male	14	2019121022:54:15	Abdominal pain
18073000095	Female	14	2019121107:58:05	Respiratory infections
18073000095	Female	14	2019121107:58:05	Heat
19121000784	Male	14	2019121109:30:03	Heat
19121000784	Male	14	2019121109:30:03	Respiratory infections
19121101430	Female	14	2019121111:16:49	Abdominal pain
19121101464	Male	14	2019121111:29:06	Respiratory infections
19121101765	Male	14	2019121113:24:47	Respiratory infections
17120100348	Male	14	2019121113:39:50	Bacterial infection
17120100348	Male	14	2019121113:39:50	Respiratory infections
19121103044	Male	14	2019121123:43:32	Respiratory infections
19121103044	Male	14	2019121123:43:32	Heat
19121200021	Male	14	2019121200:40:17	Respiratory infections
19121200021	Male	14	2019121200:40:17	Heat
17120100348	Male	14	2019121208:53:04	Bacterial infection
17120100348	Male	14	2019121208:53:04	Respiratory infections
19121000784	Male	14	2019121209:53:06	Respiratory infections
19121000784	Male	14	2019121209:53:06	Heat
19121201458	Male	14	2019121211:16:35	Pain
18073000095	Female	14	2019121211:43:48	Respiratory infections
18073000095	Female	14	2019121211:43:48	Heat
19121202013	Male	14	2019121214:30:01	Chest pain
19121202013	Male	14	2019121214:30:01	Dizziness
19121202375	Male	14	2019121216:01:41	Respiratory infections
19121300055	Male	14	2019121303:29:47	Respiratory infections
19121300055	Male	14	2019121303:29:47	Heat
19121300055	Male	14	2019121303:29:47	Cough
19121000784	Male	14	2019121308:45:24	Respiratory infections
19121000784	Male	14	2019121308:45:24	Heat
17120100348	Male	14	2019121309:07:23	Bacterial infection
17120100348	Male	14	2019121309:07:23	Respiratory infections
18073000095	Female	14	2019121309:48:04	Viral infection
18073000095	Female	14	2019121309:48:04	Bronchitis
18073000095	Female	14	2019121309:48:04	Respiratory infections
19121301259	Female	14	2019121310:35:33	Heat
19121301259	Female	14	2019121310:35:33	Respiratory infections
19050702310	Female	14	2019121312:15:32	Respiratory infections
19050702310	Female	14	2019121312:15:32	Heat
19121301892	Male	14	2019121313:58:39	Respiratory infections
19121301984	Male	14	2019121314:22:35	Bronchitis
19121301984	Male	14	2019121314:22:35	Bacterial infection
19121302152	Female	14	2019121315:19:43	Influenza
19121302152	Female	14	2019121315:19:43	Heat
16123186923	Female	14	2019121316:22:09	Heat
19120900662	Female	14	2019121316:51:55	Bacterial infection
19120900662	Female	14	2019121316:51:55	Heat
19092701598	Female	14	2019121404:34:55	Bacterial infection
19092701598	Female	14	2019121404:34:55	Gastritis
19092701598	Female	14	2019121404:34:55	Abdominal pain
19042200084	Female	14	2019121405:59:29	Bacterial infection
19042200084	Female	14	2019121405:59:29	Infectious fever
19121000784	Male	14	2019121408:11:16	Respiratory infections
19121400726	Male	14	2019121408:58:18	Respiratory infections
19121400726	Male	14	2019121408:58:18	Heat
19121400784	Male	14	2019121409:11:24	White blood cell disease
17120100348	Male	14	2019121409:28:56	Respiratory infections
17120100348	Male	14	2019121409:28:56	Bacterial infection
18073000095	Female	14	2019121410:38:58	Viral infection
18073000095	Female	14	2019121410:38:58	Bronchitis
18073000095	Female	14	2019121410:38:58	Respiratory infections
19121401361	Male	14	2019121411:25:58	Upper respiratory tract infection
19121401361	Male	14	2019121411:25:58	Viral infection
19121401361	Male	14	2019121411:25:58	Heat
19121401803	Female	14	2019121414:07:03	Bacterial infection
19121401803	Female	14	2019121414:07:03	Viral infection
19121401803	Female	14	2019121414:07:03	Heat
19121401803	Female	14	2019121414:07:03	Respiratory infections
19120900662	Female	14	2019121415:15:06	Bacterial infection
19120900662	Female	14	2019121415:15:06	Heat
19121101464	Male	14	2019121416:12:14	Viral infection
19121101464	Male	14	2019121416:12:14	Respiratory infections
19050702310	Female	14	2019121417:44:42	Heat
19121402506	Female	14	2019121420:05:38	Be palpitations
19121500107	Male	14	2019121505:50:34	Respiratory infections
19121500122	Male	14	2019121506:09:14	Respiratory infections
18073000095	Female	14	2019121508:33:00	Bronchitis
18073000095	Female	14	2019121508:33:00	Respiratory infections
18073000095	Female	14	2019121508:33:00	Viral infection
19121101464	Male	14	2019121510:58:46	Viral infection
19121101464	Male	14	2019121510:58:46	Respiratory infections
19121501426	Female	14	2019121513:09:39	Bacterial infection
19121501426	Female	14	2019121513:09:39	Viral infection
19121501426	Female	14	2019121513:09:39	Respiratory infections
19120900662	Female	14	2019121516:34:00	Bacterial infection
19120900662	Female	14	2019121516:34:00	Heat
19050702310	Female	14	2019121519:44:06	Respiratory infections
19050702310	Female	14	2019121519:44:06	Heat
18110200089	Male	14	2019121602:02:55	Chest pain
19120900662	Female	14	2019121609:07:44	Heat
19120900662	Female	14	2019121609:07:44	Bacterial infection
19081202289	Male	14	2019121609:23:21	Bacterial infection
19081202289	Male	14	2019121609:23:21	Asthma bronchitis
18073000095	Female	14	2019121613:07:42	Bronchitis
18073000095	Female	14	2019121613:07:42	Respiratory infections
18091301770	Female	14	2019121616:14:49	Viral infection
18091301770	Female	14	2019121616:14:49	Respiratory infections
19050702310	Female	14	2019121619:25:17	Respiratory infections
19050702310	Female	14	2019121619:25:17	Heat
19121700479	Female	14	2019121708:04:15	Respiratory infections
19121700479	Female	14	2019121708:04:15	Cough
19121700479	Female	14	2019121708:04:15	Heat
18073000095	Female	14	2019121709:10:17	Bronchitis
18091301770	Female	14	2019121714:00:19	Viral infection
18091301770	Female	14	2019121714:00:19	Respiratory infections
18033100242	Male	14	2019121718:53:42	Bacterial infection
18033100242	Male	14	2019121718:53:42	Respiratory infections
19121702796	Male	14	2019121721:37:24	Respiratory infections
17120902041	Male	14	2019121806:26:28	Heat
17120902041	Male	14	2019121806:26:28	Respiratory infections
19121800478	Female	14	2019121807:50:04	Abdominal pain
19121801116	Male	14	2019121810:25:13	Bacterial infection
19121801116	Male	14	2019121810:25:13	Heat
19121801123	Female	14	2019121810:26:24	Heat
19121801494	Male	14	2019121811:57:16	Respiratory infections
19121801494	Male	14	2019121811:57:16	Bacterial infection
19121801494	Male	14	2019121811:57:16	Heat
19121802124	Female	14	2019121814:35:36	Respiratory infections
19101901820	Female	14	2019121816:15:20	Abdominal pain
18033100242	Male	14	2019121911:24:43	Respiratory infections
19121902545	Male	14	2019121918:45:11	Bacterial infection
19121902545	Male	14	2019121918:45:11	Heat
19121902545	Male	14	2019121918:45:11	Cough
19121902579	Male	14	2019121919:12:19	Upper respiratory tract infection?
19121902579	Male	14	2019121919:12:19	Cough
19121902579	Male	14	2019121919:12:19	Heat
19121902579	Male	14	2019121919:12:19	Bronchitis?
18033100242	Male	14	2019122011:24:41	Respiratory infections
19120701972	Female	14	2019122017:53:17	Respiratory infections
19122002771	Female	14	2019122022:24:53	Chest pain
19122002771	Female	14	2019122022:24:53	Chest stuffy
19122100051	Female	14	2019122104:44:00	Respiratory infections
19122100051	Female	14	2019122104:44:00	Heat
18033100242	Male	14	2019122111:54:20	Respiratory infections
19121000784	Male	14	2019122112:46:40	Respiratory infections
19121000784	Male	14	2019122112:46:40	Heat
19122102163	Female	14	2019122117:59:44	Respiratory infections
19122102163	Female	14	2019122117:59:44	Heat
19090800814	Female	14	2019122118:45:42	Respiratory infections
19090800814	Female	14	2019122118:45:42	Heat
19122201465	Female	14	2019122214:50:14	Bacterial infection
19122201465	Female	14	2019122214:50:14	Influenza
19122201465	Female	14	2019122214:50:14	Heat
19122201465	Female	14	2019122214:50:14	Respiratory infections
19122201574	Male	14	2019122215:57:20	Heat
19122300662	Male	14	2019122308:40:53	Diarrhea
19101300321	Female	14	2019122308:58:07	Abdominal pain
19101300321	Female	14	2019122308:58:07	Gastritis
19122300794	Female	14	2019122309:05:26	Respiratory infections
19122303023	Female	14	2019122323:16:39	Bacterial infection
19122303023	Female	14	2019122323:16:39	Urinary tract infection
19122303023	Female	14	2019122323:16:39	Diabetes
19122303023	Female	14	2019122323:16:39	Ketosis
16123176245	Male	14	2019122404:27:50	Mickory inflammation
16123176245	Male	14	2019122404:27:50	Respiratory infections
18073000095	Female	14	2019122408:05:26	Bronchitis
19122401436	Female	14	2019122412:08:02	Heat
19122401436	Female	14	2019122412:08:02	Respiratory infections
16123176245	Male	14	2019122505:53:01	Mickory inflammation
16123176245	Male	14	2019122505:53:01	Respiratory infections
19122500496	Male	14	2019122508:15:47	Respiratory infections
19122501845	Male	14	2019122514:44:59	Respiratory infections
19122501845	Male	14	2019122514:44:59	Cough
19122502281	Female	14	2019122518:04:16	Respiratory infections
16123176245	Male	14	2019122605:54:07	Mickory inflammation
16123176245	Male	14	2019122605:54:07	Respiratory infections
19122600839	Female	14	2019122609:22:47	Heat
19122600839	Female	14	2019122609:22:47	Respiratory infections
19122601225	Male	14	2019122610:56:56	Cough
18011200660	Female	14	2019122621:41:10	Chest pain
19122700056	Male	14	2019122705:54:44	Mickory inflammation
19122800429	Male	14	2019122808:04:34	Be palpitations
19122801991	Female	14	2019122816:41:43	Influenza
19122801991	Female	14	2019122816:41:43	Heat
19122901552	Female	14	2019122915:50:56	Gastritis
19122901003	Male	14	2019122918:35:15	Heat
19122901003	Male	14	2019122918:35:15	Gastritis
19122901003	Male	14	2019122918:35:15	Abdominal pain
19052902271	Male	14	2019123002:46:04	Bacterial infection
19052902271	Male	14	2019123002:46:04	Gastritis
19052902271	Male	14	2019123002:46:04	Stomach retention
19052902271	Male	14	2019123002:46:04	Nausea and vomiting
18082601746	Male	14	2019123008:13:11	Bacterial infection
18082601746	Male	14	2019123008:13:11	Viral infection
18082601746	Male	14	2019123008:13:11	Heat
18082601746	Male	14	2019123008:13:11	Bronchitis
19123000338	Female	14	2019123010:23:43	One-off sexual consciousness is lost
19070301494	Male	14	2019123016:21:26	Respiratory infections
19070301494	Male	14	2019123016:21:26	Pneumonia
19070301494	Male	14	2019123016:21:26	Heat
19123002191	Female	14	2019123016:51:33	Gastritis
19123002191	Female	14	2019123016:51:33	Heat
19123002191	Female	14	2019123016:51:33	Abdominal pain
19123002191	Female	14	2019123016:51:33	Bacterial infection
19052902271	Male	14	2019123017:43:11	Bacterial infection
19052902271	Male	14	2019123017:43:11	Stomach retention
19052902271	Male	14	2019123017:43:11	Gastritis
19052902271	Male	14	2019123017:43:11	Nausea and vomiting
18082601746	Male	14	2019123112:39:49	Viral infection
18082601746	Male	14	2019123112:39:49	Heat
18082601746	Male	14	2019123112:39:49	Bronchitis
18121400075	Female	15	2019010110:42:56	Abdominal pain
18123102593	Male	15	2019010112:59:25	Respiratory infections
18123102593	Male	15	2019010112:59:25	Heat
18123102593	Male	15	2019010112:59:25	Bacterial infection
19010101800	Male	15	2019010119:30:47	Bronchitis
19010102042	Male	15	2019010122:03:00	Respiratory infections
18123102593	Male	15	2019010200:01:59	Bacterial infection
18123102593	Male	15	2019010200:01:59	Respiratory infections
18123102593	Male	15	2019010200:01:59	Heat
161230120840	Male	15	2019010304:05:01	Respiratory infections
19010302205	Female	15	2019010313:42:26	Respiratory infections
19010302205	Female	15	2019010313:42:26	Heat
19010302293	Male	15	2019010314:04:52	Respiratory infections
19010302293	Male	15	2019010314:04:52	Heat
19010302381	Female	15	2019010314:31:57	Heat
161230120840	Male	15	2019010400:20:59	Respiratory infections
19010400024	Female	15	2019010401:06:52	Sinus tachycardia
19010400024	Female	15	2019010401:06:52	Be palpitations
19010400241	Male	15	2019010407:02:12	Respiratory infections
19010400410	Male	15	2019010407:35:32	Upper respiratory tract infection
17041100674	Female	15	2019010408:29:26	Tracheitis
17041100674	Female	15	2019010408:29:26	Viral infection
19010402759	Female	15	2019010418:41:18	Respiratory infections
19010402946	Male	15	2019010420:21:37	Tracheitis
19010402946	Male	15	2019010420:21:37	Heat
161230120840	Male	15	2019010500:14:03	Bronchitis
161230120840	Male	15	2019010500:14:03	Respiratory infections
19010500072	Female	15	2019010504:42:48	Respiratory infections
19010500072	Female	15	2019010504:42:48	Gastritis
19010500072	Female	15	2019010504:42:48	Rash virus?
19010500072	Female	15	2019010504:42:48	Heat
19010600521	Female	15	2019010613:10:05	Respiratory infections
19010602140	Female	15	2019010619:25:26	Heat
19010602140	Female	15	2019010619:25:26	Bacterial infection
19010700412	Male	15	2019010707:43:00	Heat
19010700412	Male	15	2019010707:43:00	Viral infection
19010600521	Female	15	2019010709:47:43	Respiratory infections
19010703337	Male	15	2019010723:07:11	Abdominal pain
19010800073	Male	15	2019010805:47:11	Respiratory infections
19010700412	Male	15	2019010813:48:34	Heat
19010700412	Male	15	2019010813:48:34	Viral infection
19010703104	Male	15	2019010815:23:25	Heat
19010703104	Male	15	2019010815:23:25	Respiratory infections
19010900364	Male	15	2019010907:30:08	Chest stuffy
19010700412	Male	15	2019010912:13:03	Viral infection
19010700412	Male	15	2019010912:13:03	Heat
19010902765	Female	15	2019010920:13:26	Abdominal pain
161230073177	Male	15	2019011009:43:43	Bronchitis
161230073177	Male	15	2019011009:43:43	Asthma
161230073177	Male	15	2019011009:43:43	Cough
19010700412	Male	15	2019011012:13:48	Viral infection
19010700412	Male	15	2019011012:13:48	Heat
18051003114	Female	15	2019011012:44:27	Bronchitis
18051003114	Female	15	2019011012:44:27	Cough
19011002163	Male	15	2019011015:16:27	Bacterial infection
18051003114	Female	15	2019011108:46:02	Bronchitis
18021101014	Male	15	2019011111:04:03	Bronchitis
18021101014	Male	15	2019011111:04:03	Respiratory infections
19011200102	Female	15	2019011206:33:36	Abdominal pain
18092400181	Male	15	2019011214:05:14	Cough
19011202496	Male	15	2019011222:02:00	Upper respiratory tract infection
18123100714	Male	15	2019011309:43:49	Asthma bronchitis
18123100714	Male	15	2019011309:43:49	Bronchitis
19011300953	Male	15	2019011311:26:10	Bronchitis
19011300953	Male	15	2019011311:26:10	Cough
17020101427	Male	15	2019011314:39:34	Anemia
18082502221	Female	15	2019011319:32:55	Mickory inflammation
18082502221	Female	15	2019011319:32:55	Upper respiratory tract infection
18082502221	Female	15	2019011319:32:55	Heat
161231102351	Male	15	2019011505:01:14	Respiratory infections
18111801586	Male	15	2019011610:45:25	Respiratory infections
19011602704	Male	15	2019011622:44:31	Chest pain
17010275387	Female	15	2019011706:33:42	Infectious fever
19011701404	Male	15	2019011712:06:11	Foreign material in the digestive tract
19011800859	Female	15	2019011809:39:19	Gastritis
19011800859	Female	15	2019011809:39:19	Abdominal pain
19011800859	Female	15	2019011809:39:19	Rash
19011802422	Male	15	2019011820:53:28	Heat
19011802422	Male	15	2019011820:53:28	Abdominal pain
19011901396	Male	15	2019011912:30:55	Bronchitis
19011901854	Female	15	2019011915:37:09	Mickory inflammation
19011901854	Female	15	2019011915:37:09	Upper respiratory tract infection
19011901854	Female	15	2019011915:37:09	Heat
19011902078	Female	15	2019011917:57:31	Respiratory infections
19012001634	Male	15	2019012019:27:11	Intestinal infection
161230104268	Female	15	2019012023:00:47	Pneumonia
17081401964	Male	15	2019012112:42:55	Pneumonia
17021702972	Female	15	2019012115:53:24	Hyperthyroidism
19012200060	Male	15	2019012205:39:42	Respiratory infections
19012201662	Female	15	2019012213:39:34	Syncope
19012202107	Female	15	2019012216:10:55	Bronchitis
19012202107	Female	15	2019012216:10:55	Anemia
161231102351	Male	15	2019012218:58:50	Respiratory infections
19012301577	Female	15	2019012313:29:39	Respiratory infections
19012301577	Female	15	2019012313:29:39	Infectious fever
18121601345	Female	15	2019012400:52:45	Upper respiratory tract infection
19012502044	Male	15	2019012520:23:49	Intestinal bacterial group disorders
19012502044	Male	15	2019012520:23:49	Heat
19012502044	Male	15	2019012520:23:49	Bacterial infection
19012502044	Male	15	2019012520:23:49	Gastritis
19012502044	Male	15	2019012520:23:49	Vomiting
19012601135	Male	15	2019012611:44:59	Respiratory infections
18082502221	Female	15	2019012620:37:44	Heat
18082502221	Female	15	2019012620:37:44	Bacterial infection
18082502221	Female	15	2019012620:37:44	Bronchitis
18082502221	Female	15	2019012706:38:25	Bacterial infection
18082502221	Female	15	2019012706:38:25	Bronchitis
19012700761	Female	15	2019012711:03:05	Heat
19012701124	Male	15	2019012715:15:29	Heat
19012701124	Male	15	2019012715:15:29	Respiratory infections
19012800047	Male	15	2019012805:49:01	Upper respiratory tract infection
19012800047	Male	15	2019012805:49:01	Heat
18082502221	Female	15	2019012807:48:38	Bronchitis
18082502221	Female	15	2019012807:48:38	Bacterial infection
19012901465	Female	15	2019012914:06:20	Be palpitations
18082502221	Female	15	2019012915:30:06	Bronchitis
18121200699	Male	15	2019013012:48:30	Gastritis
18121200699	Male	15	2019013012:48:30	Abdominal pain
19013001379	Female	15	2019013014:56:26	Cough
19013101173	Male	15	2019013114:06:28	Respiratory infections
19013101251	Male	15	2019013114:40:57	Pneumonia
19013101251	Male	15	2019013114:40:57	Cough
19013101251	Male	15	2019020114:42:49	Pneumonia
19020200340	Male	15	2019020208:54:31	Gastritis
19020200340	Male	15	2019020208:54:31	Vomiting
19020200340	Male	15	2019020208:54:31	Bacterial infection
19020200340	Male	15	2019020208:54:31	Abdominal pain
19013101251	Male	15	2019020214:33:42	Pneumonia
19013101251	Male	15	2019020314:29:27	Pneumonia
19020500636	Male	15	2019020520:42:16	Bronchitis
19020600436	Female	15	2019020611:37:00	Respiratory infections
19020701155	Male	15	2019020723:12:34	Bacterial infection
19020701155	Male	15	2019020723:12:34	Heat
19020701155	Male	15	2019020723:12:34	Headache
19020701155	Male	15	2019020813:59:39	Bacterial infection
19020701155	Male	15	2019020813:59:39	Heat
19020901427	Male	15	2019020915:12:41	Viral infection
19020901427	Male	15	2019020915:12:41	Heat
19020701155	Male	15	2019020917:52:40	Bacterial infection
19020701155	Male	15	2019020917:52:40	Heat
19020901736	Male	15	2019020919:30:14	Upper respiratory tract infection
19020901741	Male	15	2019020919:31:58	Cough
18021101014	Male	15	2019021016:16:11	Upper respiratory tract infection
18021101014	Male	15	2019021016:16:11	Headache
19021001861	Female	15	2019021019:29:44	Bacterial infection
19021001861	Female	15	2019021019:29:44	Gastritis
19021001861	Female	15	2019021019:29:44	Nausea and vomiting
19021102951	Female	15	2019021210:23:58	Chest pain
19021201415	Male	15	2019021211:39:25	Infectious fever
19021202224	Male	15	2019021216:58:18	Bacterial infection
19021202224	Male	15	2019021216:58:18	Gastritis
19021202224	Male	15	2019021216:58:18	Vomiting
161230092796	Female	15	2019021304:19:50	Bacterial infection
161230092796	Female	15	2019021304:19:50	Heat
161230092796	Female	15	2019021304:19:50	Vomiting
161230092796	Female	15	2019021304:19:50	Gastritis
17010112341	Female	15	2019021307:33:38	Hyperthyroidism
19021302485	Male	15	2019021318:40:08	Bronchitis
19021400015	Female	15	2019021401:51:40	Abdominal pain
18021201340	Female	15	2019021409:13:22	Haematuria
19021402615	Male	15	2019021422:53:01	Respiratory infections
19021500494	Female	15	2019021508:49:29	Stomach pain
17091501015	Male	15	2019021521:19:45	Cough
17091501015	Male	15	2019021521:19:45	Upper respiratory tract infection
19021402615	Male	15	2019021600:34:39	Bronchitis
19021402615	Male	15	2019021600:34:39	Respiratory infections
19021600041	Male	15	2019021605:40:54	Acute gastritis
19021600041	Male	15	2019021605:40:54	Bacterial infection
19021600041	Male	15	2019021605:40:54	Acute stomach dilation
19021600041	Male	15	2019021605:40:54	Stomach retention
19021402615	Male	15	2019021614:28:41	Bronchitis
19021402615	Male	15	2019021614:28:41	Respiratory infections
19011602704	Male	15	2019021705:32:56	Nausea and vomiting
19011602704	Male	15	2019021705:32:56	Bacterial infection
19011602704	Male	15	2019021705:32:56	Acute gastritis
19011602704	Male	15	2019021705:32:56	Diarrhea
19021600041	Male	15	2019021708:09:42	Acute gastritis
19021600041	Male	15	2019021708:09:42	Acute stomach dilation
19021600041	Male	15	2019021708:09:42	Intestinal bacterial group disorders
19021600041	Male	15	2019021708:09:42	Stomach retention
19021600041	Male	15	2019021708:09:42	Bacterial infection
19021402615	Male	15	2019021714:39:40	Bronchitis
19021801083	Male	15	2019021810:02:37	Chest stuffy
17061401754	Female	15	2019021819:14:32	Vomiting
19021802825	Female	15	2019021821:21:57	Cough
161230050522	Male	15	2019022022:48:01	Bronchitis
17091501015	Male	15	2019022107:04:58	Upper respiratory tract infection
17091501015	Male	15	2019022107:04:58	Cough
19022100331	Female	15	2019022107:27:17	Abdominal pain
19022100623	Male	15	2019022108:28:53	Myocarditis?
19022100623	Male	15	2019022108:28:53	Chest pain
17081900459	Male	15	2019022212:36:52	Eddie is sick
19022302568	Male	15	2019022319:58:25	Bronchitis
19022402277	Male	15	2019022423:19:45	Bronchitis
19022402277	Male	15	2019022423:19:45	Asthma
19022502061	Female	15	2019022513:50:20	Acute throat inflammation
19022502989	Female	15	2019022521:16:15	Digestive bleeding
19022502989	Female	15	2019022521:16:15	Abdominal pain
19022600311	Female	15	2019022607:39:56	Abdominal pain
19022600311	Female	15	2019022607:39:56	Acute gastritis
19022501810	Male	15	2019022614:18:50	Chest pain
19022702217	Male	15	2019022715:46:08	Cough
19022702413	Female	15	2019022717:25:13	Upper respiratory tract infection
19022702694	Male	15	2019022720:41:18	Upper respiratory tract infection
19022702694	Male	15	2019022720:41:18	Cough
19022702884	Female	15	2019022722:59:40	Abdominal pain
19022702884	Female	15	2019022722:59:40	Nausea and vomiting
19022000799	Male	15	2019022801:44:55	Heat
19022000799	Male	15	2019022801:44:55	Bacterial infection
19022000799	Male	15	2019022801:44:55	Upper respiratory tract infection
19022802354	Female	15	2019022816:26:33	Heat
161230092805	Male	15	2019022822:02:11	Asthma
161230092805	Male	15	2019022822:02:11	Upper respiratory tract infection
19030100496	Male	15	2019030108:08:22	Mickory inflammation
19030100496	Male	15	2019030108:08:22	Upper respiratory tract infection
19030100727	Female	15	2019030108:51:59	Acute abscess pachian inflammation
19030100727	Female	15	2019030108:51:59	Infectious monocytosis
161230092805	Male	15	2019030118:29:21	Asthma
19030102535	Female	15	2019030119:30:32	Chest pain
19030101604	Female	15	2019030207:35:24	Chest pain
19030101604	Female	15	2019030207:35:24	Abdominal pain
19022601238	Male	15	2019030209:21:50	Upper respiratory tract infection
19022601238	Male	15	2019030209:21:50	Respiratory infections
19022601238	Male	15	2019030209:21:50	Lackluster
18050703282	Male	15	2019030222:49:40	Infectious fever
161230050522	Male	15	2019030300:49:53	Chest stuffy
161230050522	Male	15	2019030300:49:53	Asthma?
19030301487	Male	15	2019030314:43:26	Abdominal pain
19030301487	Male	15	2019030314:43:26	Vomiting
19030301487	Male	15	2019030314:43:26	Gastritis
18010800070	Male	15	2019030407:44:10	Infectious fever
19030300510	Male	15	2019030408:57:30	Hypertension?
19030401108	Male	15	2019030409:35:29	Bacterial infection
19030401108	Male	15	2019030409:35:29	Abdominal pain
19030401108	Male	15	2019030409:35:29	Nausea and vomiting
19030100727	Female	15	2019030411:41:40	Acute abscess pachian inflammation
19030100727	Female	15	2019030411:41:40	Infectious monocytosis
19030402044	Female	15	2019030413:21:37	Diarrhea
19030402236	Female	15	2019030414:09:51	Acute gastritis
19030402883	Female	15	2019030418:33:04	Vomiting
18041900329	Female	15	2019030519:09:45	Acute upper respiratory tract infection
19030502716	Male	15	2019030520:43:35	Heat
19030600050	Female	15	2019030605:34:24	Abdominal pain
19030600050	Female	15	2019030605:34:24	Diarrhea
19030300510	Male	15	2019030610:20:46	Hypertension
19030601745	Female	15	2019030612:55:48	Heart failure
19030601745	Female	15	2019030612:55:48	The arterial catheter is not closed
19030602246	Male	15	2019030615:31:20	Intestinal bacterial group disorders
19030602246	Male	15	2019030615:31:20	Bacterial infection
19030602246	Male	15	2019030615:31:20	Gastritis
19030602246	Male	15	2019030615:31:20	Intestinal infection
19030602619	Female	15	2019030619:32:18	Foreign matter in the digestive tract?
19030602637	Female	15	2019030619:39:38	Viral infection
19030602637	Female	15	2019030619:39:38	Upper respiratory tract infection
19030700037	Female	15	2019030704:02:24	Gastritis
19030700037	Female	15	2019030704:02:24	Abdominal pain
19030700037	Female	15	2019030704:02:24	Diarrhea
19030700040	Female	15	2019030704:37:23	Gout
19030701112	Male	15	2019030710:00:19	Vomiting
19011501408	Female	15	2019030711:35:04	Liver damage
19030702620	Female	15	2019030719:44:32	Chest stuffy
19030702733	Female	15	2019030720:55:47	Intestinal bacterial group disorders
19030702733	Female	15	2019030720:55:47	Vomiting
19030801552	Male	15	2019030812:38:52	Chest pain
19030801807	Male	15	2019030814:01:06	Neck pain
19030802281	Female	15	2019030817:56:20	Respiratory infections
18082202867	Female	15	2019030819:32:02	Respiratory infections
18082202867	Female	15	2019030819:32:02	Heat
19030900038	Female	15	2019030905:06:40	Ketosis
19030900038	Female	15	2019030905:06:40	Gastritis
19030900038	Female	15	2019030905:06:40	Vomiting
19030900038	Female	15	2019030905:06:40	Bacterial infection
19030900999	Female	15	2019030909:36:51	Chest stuffy
19012201662	Female	15	2019030915:25:19	Syncope
19030902509	Female	15	2019030919:00:49	Respiratory infections
19030902646	Female	15	2019030920:52:39	Viral infection
19030902646	Female	15	2019030920:52:39	Heat
19031001404	Male	15	2019031013:43:29	Chest pain
19031200441	Male	15	2019031208:01:32	Bacterial infection
19031200441	Male	15	2019031208:01:32	Infectious fever
19031202568	Female	15	2019031218:04:01	Cough
19031202568	Female	15	2019031218:04:01	Bacterial infection
19031202568	Female	15	2019031218:04:01	Pain
19031202568	Female	15	2019031218:04:01	Upper respiratory tract infection
19031202645	Female	15	2019031218:59:26	Respiratory infections
19031300496	Female	15	2019031307:54:23	Upper respiratory tract infection
19031300496	Female	15	2019031307:54:23	Gastritis
19031300496	Female	15	2019031307:54:23	Abdominal pain
19031300496	Female	15	2019031307:54:23	Intestinal bacterial group disorders
19031300496	Female	15	2019031307:54:23	Heat
18112300547	Male	15	2019031312:27:12	Ketosis
18112300547	Male	15	2019031312:27:12	Acute gastritis
18112300547	Male	15	2019031312:27:12	Bacterial infection
19031302511	Female	15	2019031318:14:41	Bacterial infection
19031302511	Female	15	2019031318:14:41	Infection
19030901547	Female	15	2019031410:39:27	Viral infection
18061502688	Female	15	2019031418:06:10	Respiratory infections
19031402715	Female	15	2019031418:14:17	Vomiting
19031402715	Female	15	2019031418:14:17	Ketosis
19031402715	Female	15	2019031418:14:17	Gastric mucosal lesions
19031402715	Female	15	2019031418:14:17	Abdominal pain
17010305196	Female	15	2019031506:41:52	Bronchitis
17021702972	Female	15	2019031508:37:42	Hyperthyroidism
19031501597	Male	15	2019031512:18:57	Swine cholera Salmonella sepsis
19031501597	Male	15	2019031512:18:57	Stomach pain
18050302361	Male	15	2019031516:48:13	Bacterial infection
18050302361	Male	15	2019031516:48:13	Nausea and vomiting
19031502452	Female	15	2019031518:34:51	Cough
19031502452	Female	15	2019031518:34:51	Respiratory infections
18102602398	Female	15	2019031519:49:27	Cough
19031502676	Male	15	2019031521:05:50	Respiratory infections
18092400181	Male	15	2019031615:54:35	Upper respiratory tract infection
19031602425	Male	15	2019031617:59:09	Chest pain
19031602551	Female	15	2019031619:37:00	Heat
19031701261	Male	15	2019031711:57:07	Abdominal pain
19031701315	Female	15	2019031712:18:30	Severe anemia
19031701315	Female	15	2019031712:18:30	Bacterial infection
19031701315	Female	15	2019031712:18:30	Whole blood cell reduction
19031701315	Female	15	2019031712:18:30	White cell reduction
19031701315	Female	15	2019031712:18:30	Gastritis
19031701315	Female	15	2019031712:18:30	Nausea and vomiting
19031701315	Female	15	2019031712:18:30	Hereditary polycytosis
19031701967	Female	15	2019031718:04:11	Bronchitis
19031800051	Male	15	2019031803:02:15	Nephritis?
19031800051	Male	15	2019031803:02:15	Acute gastritis
19031801423	Male	15	2019031810:24:36	Abdominal pain
19031801423	Male	15	2019031810:24:36	Bacterial infection
19031803134	Male	15	2019031820:19:53	Respiratory infections
19031803134	Male	15	2019031820:19:53	Haemoptysis
19031803135	Female	15	2019031820:21:28	Infectious fever
18072200152	Female	15	2019031822:04:02	Respiratory infections
19031902781	Female	15	2019031920:32:08	Gastric mucosal lesions
19031902781	Female	15	2019031920:32:08	Abdominal pain
19031902781	Female	15	2019031920:32:08	Gastritis
19031902781	Female	15	2019031920:32:08	Nausea and vomiting
17112202078	Male	15	2019032008:30:11	Infectious fever
19032002685	Female	15	2019032019:31:13	Bacterial infection
19032002685	Female	15	2019032019:31:13	Upper respiratory tract infection
19032002685	Female	15	2019032019:31:13	Heat
19032002893	Male	15	2019032021:41:24	Bacterial infection
19032002893	Male	15	2019032021:41:24	Heat
19032100246	Female	15	2019032107:43:16	Respiratory infections
19032101797	Female	15	2019032114:05:23	Gastritis
19032101797	Female	15	2019032114:05:23	Intestinal bacterial group disorders
19032101797	Female	15	2019032114:05:23	Abdominal pain
19032102675	Male	15	2019032121:54:29	Influenza-like pharyngetis of known viruses
19032102675	Male	15	2019032121:54:29	Heat
19032200013	Male	15	2019032201:16:05	Heat
19032200013	Male	15	2019032201:16:05	Mickory inflammation
19032202656	Female	15	2019032219:56:31	Bacterial infection
19032202656	Female	15	2019032219:56:31	Nausea and vomiting
19032202656	Female	15	2019032219:56:31	Gastritis
19032202656	Female	15	2019032219:56:31	Intestinal infection
19032202656	Female	15	2019032309:59:14	Intestinal infection
19032202656	Female	15	2019032309:59:14	Gastritis
19032302005	Female	15	2019032315:15:38	Upper respiratory tract infection
19032302005	Female	15	2019032315:15:38	Bronchitis
19032302005	Female	15	2019032315:15:38	Cough
19032400048	Female	15	2019032405:58:28	Nausea and vomiting
19032202656	Female	15	2019032409:54:26	Intestinal infection
19032202656	Female	15	2019032409:54:26	Bacterial infection
19032202656	Female	15	2019032409:54:26	Gastritis
18022402280	Male	15	2019032416:34:02	Heat
19032500534	Male	15	2019032508:28:44	Thyopharyngetis
19032500534	Male	15	2019032508:28:44	Upper respiratory tract infection
19032500534	Male	15	2019032508:28:44	Heat
19032602392	Male	15	2019032616:53:57	Hypertension?
19032602392	Male	15	2019032616:53:57	Disgusting
19032700032	Female	15	2019032705:39:03	Be palpitations
19032700032	Female	15	2019032705:39:03	Bacterial infection
19032700032	Female	15	2019032705:39:03	Abdominal pain
19032700032	Female	15	2019032705:39:03	Nausea and vomiting
19032701357	Female	15	2019032710:51:33	Diarrhea
19032701357	Female	15	2019032710:51:33	Abdominal pain
19032702762	Male	15	2019032720:23:55	Cough
19032702762	Male	15	2019032720:23:55	Chest stuffy
161230120840	Male	15	2019032807:36:04	Bacterial infection
161230120840	Male	15	2019032807:36:04	Heat
161230120840	Male	15	2019032807:36:04	Respiratory infections
19032801577	Female	15	2019032812:28:05	Bacterial infection
19032801577	Female	15	2019032812:28:05	Diarrhea
19032801577	Female	15	2019032812:28:05	Gastritis
19032801584	Female	15	2019032812:30:19	Abdominal pain
19032801797	Female	15	2019032813:47:21	Respiratory infections
19032802523	Male	15	2019032820:07:51	Respiratory infections
19032802523	Male	15	2019032820:07:51	Breathing
19032802547	Male	15	2019032820:25:53	Respiratory infections
19032802547	Male	15	2019032820:25:53	Asthma
16123174382	Female	15	2019032903:16:39	Bacterial infection
19032900029	Male	15	2019032905:29:34	Heat
161230120840	Male	15	2019032907:10:18	Bacterial infection
161230120840	Male	15	2019032907:10:18	Respiratory infections
19032900815	Male	15	2019032909:23:33	Respiratory infections
19032901519	Female	15	2019032912:39:17	Bacterial infection
19032901519	Female	15	2019032912:39:17	Viral infection
19032901519	Female	15	2019032912:39:17	Respiratory infections
19032801797	Female	15	2019032914:20:51	Respiratory infections
18090402781	Male	15	2019032920:34:45	Cough
161230120840	Male	15	2019033007:27:47	Tracheitis
161230120840	Male	15	2019033007:27:47	Respiratory infections
161230120840	Male	15	2019033007:27:47	Bacterial infection
17111901575	Female	15	2019033008:17:04	Infectious fever
19033001257	Male	15	2019033010:41:20	Thyopharyngetis
19033001257	Male	15	2019033010:41:20	Upper respiratory tract infection
19033001257	Male	15	2019033010:41:20	Bronchitis
161230120840	Male	15	2019033107:32:17	Tracheitis
161230120840	Male	15	2019033107:32:17	Respiratory infections
19033101416	Male	15	2019033115:47:44	Respiratory infections
19040100379	Female	15	2019040107:31:38	Abdominal pain
161230120840	Male	15	2019040108:17:40	Respiratory infections
161230120840	Male	15	2019040108:17:40	Tracheitis
19040101095	Male	15	2019040109:28:09	Respiratory infections
19040101237	Female	15	2019040109:51:16	Bacterial infection
19040101237	Female	15	2019040109:51:16	Respiratory infections
19040101630	Female	15	2019040111:07:09	Respiratory infections
161230092796	Female	15	2019040111:27:52	Nausea and vomiting
161230092796	Female	15	2019040111:27:52	Heat
161230092796	Female	15	2019040111:27:52	Viral infection
19040102812	Male	15	2019040117:59:48	Abdominal pain
161230078817	Male	15	2019040118:38:41	Heat
161230078817	Male	15	2019040118:38:41	Respiratory infections
19032900029	Male	15	2019040119:18:40	Heat
19040102951	Male	15	2019040119:35:48	Allergic rhinitis with asthma
19040102812	Male	15	2019040207:28:49	Gastritis
19040102812	Male	15	2019040207:28:49	Abdominal pain
19032900029	Male	15	2019040213:10:24	Pulmonary infection
19032900029	Male	15	2019040213:10:24	Heat
19040202446	Male	15	2019040217:32:47	Asthma
19040202567	Female	15	2019040219:24:04	Intestinal infection
19040202742	Female	15	2019040221:02:54	Respiratory infections
19040202761	Female	15	2019040221:15:29	Respiratory infections
19040202794	Female	15	2019040221:57:13	Hives
19040202794	Female	15	2019040221:57:13	Heat
19040202794	Female	15	2019040221:57:13	Bacterial infection
19040300283	Female	15	2019040307:20:51	Thyopharyngetis
19040300283	Female	15	2019040307:20:51	Heat
19040300343	Female	15	2019040307:29:06	Abdominal pain
19032900029	Male	15	2019040313:17:00	Heat
19032900029	Male	15	2019040313:17:00	Pulmonary infection
19040301817	Male	15	2019040313:46:18	Pneumonia
19040301817	Male	15	2019040313:46:18	Bronchitis
18011100999	Female	15	2019040318:01:00	Respiratory infections
19040302706	Female	15	2019040320:32:00	Viral infection
19040302706	Female	15	2019040320:32:00	White cell reduction
19040302706	Female	15	2019040320:32:00	Respiratory infections
19040302706	Female	15	2019040320:32:00	Abdominal pain
19040302706	Female	15	2019040320:32:00	Heat
19040400001	Female	15	2019040400:04:19	Respiratory infections
19040400014	Male	15	2019040400:50:15	Bronchitis
19032900029	Male	15	2019040412:34:04	Pulmonary infection
19040102951	Male	15	2019040418:09:39	Bronchitis
19040102951	Male	15	2019040418:09:39	Allergic rhinitis with asthma
19040402605	Male	15	2019040420:10:04	Bronchitis
19040500121	Male	15	2019040508:54:17	Respiratory infections
19032900029	Male	15	2019040516:16:48	Pulmonary infection
19040501485	Male	15	2019040516:46:47	Diarrhea
18120600879	Male	15	2019040606:59:06	Heat
18120600879	Male	15	2019040606:59:06	Bacterial infection
19040600630	Female	15	2019040608:21:58	Cough
17010224434	Female	15	2019040609:16:31	Abdominal pain
19040600222	Male	15	2019040611:32:01	Acute gastric mucosal disease
19040600222	Male	15	2019040611:32:01	Abdominal pain
19032900029	Male	15	2019040615:50:22	Pulmonary infection
19040501314	Female	15	2019040618:10:39	Respiratory infections
19040501314	Female	15	2019040618:10:39	Bacterial infection
19040400001	Female	15	2019040622:10:51	Respiratory infections
19040602743	Male	15	2019040622:36:13	Diarrhea
18120600879	Male	15	2019040707:06:29	Bacterial infection
16123179787	Female	15	2019040711:29:42	Bronchitis
19032900029	Male	15	2019040715:56:07	Pulmonary infection
17110601432	Male	15	2019040805:03:39	Gastritis
17110601432	Male	15	2019040805:03:39	Abdominal pain
18120600879	Male	15	2019040806:24:51	Diarrhea
18120600879	Male	15	2019040806:24:51	Bacterial infection
19040800468	Male	15	2019040807:49:54	Respiratory infections
19040800974	Male	15	2019040809:12:10	Lackluster
19032900029	Male	15	2019040818:37:29	Pulmonary infection
19040803348	Male	15	2019040823:02:15	Chest pain
19041001447	Female	15	2019041010:40:08	Gastritis
19041001432	Male	15	2019041010:40:31	Respiratory infections
19041001432	Male	15	2019041010:40:31	Viral infection
19041002066	Female	15	2019041014:01:32	Respiratory infections
19041002406	Female	15	2019041015:41:08	Respiratory infections
19041002066	Female	15	2019041110:02:04	Pneumonia
18050401648	Male	15	2019041119:53:33	Cough
18050401648	Male	15	2019041119:53:33	Respiratory infections
19041002066	Female	15	2019041207:58:15	Pneumonia
19041300042	Female	15	2019041304:57:46	Viral infection
19041300042	Female	15	2019041304:57:46	Mickory inflammation
19041300042	Female	15	2019041304:57:46	Respiratory infections
19041300042	Female	15	2019041304:57:46	Bacterial infection
19041300042	Female	15	2019041304:57:46	Anemia
19041300042	Female	15	2019041304:57:46	Electrolyte metabolism disorders
19041300042	Female	15	2019041304:57:46	Heat
19041300051	Female	15	2019041305:39:01	Pulmonary infection
19041302451	Female	15	2019041318:48:15	Pulmonary infection
19041302451	Female	15	2019041318:48:15	Heat
19041302488	Male	15	2019041320:41:02	Hives
19041302625	Male	15	2019041321:11:24	Chest stuffy
19041400229	Male	15	2019041407:12:35	Heat
19041400229	Male	15	2019041407:12:35	Abdominal pain
19041300051	Female	15	2019041408:00:08	Pulmonary infection
19041400950	Female	15	2019041410:35:11	White cell reduction
19041400950	Female	15	2019041410:35:11	Respiratory infections
19041400883	Male	15	2019041411:07:09	Acute gastritis
19041400883	Male	15	2019041411:07:09	Nausea and vomiting
19041400883	Male	15	2019041411:07:09	Heat
19041400883	Male	15	2019041411:07:09	Bacterial infection
19041400883	Male	15	2019041411:07:09	Ketosis
17020402422	Male	15	2019041412:52:20	Bacterial infection
17020402422	Male	15	2019041412:52:20	Respiratory infections
17020402422	Male	15	2019041412:52:20	Heat
19041001432	Male	15	2019041414:22:44	Viral infection
19041001432	Male	15	2019041414:22:44	Respiratory infections
19041302451	Female	15	2019041418:00:12	Heat
19041302451	Female	15	2019041418:00:12	Pulmonary infection
19041402174	Female	15	2019041421:37:45	Respiratory infections
19041300051	Female	15	2019041507:52:54	Pulmonary infection
19041501843	Female	15	2019041512:03:48	Bacterial infection
19041501843	Female	15	2019041512:03:48	Respiratory infections
19041501843	Female	15	2019041512:03:48	Headache
17020402422	Male	15	2019041515:08:07	Bacterial infection
17020402422	Male	15	2019041515:08:07	Heat
17020402422	Male	15	2019041515:08:07	Respiratory infections
17080202590	Female	15	2019041516:27:35	Respiratory infections
19041302451	Female	15	2019041517:47:37	Heat
19041302451	Female	15	2019041517:47:37	Pulmonary infection
161230019723	Male	15	2019041520:29:34	Lackluster
161230019723	Male	15	2019041520:29:34	Respiratory infections
19041503261	Female	15	2019041522:47:03	Bronchitis
19041600027	Male	15	2019041602:05:41	Vomiting
19041600034	Male	15	2019041603:13:29	Respiratory infections
19041600034	Male	15	2019041603:13:29	Heat
19041300051	Female	15	2019041607:31:26	Pulmonary infection
161230020243	Male	15	2019041610:06:29	Cough
19041302451	Female	15	2019041612:10:01	Heat
19041302451	Female	15	2019041612:10:01	Pulmonary infection
19040400001	Female	15	2019041619:02:32	Pulmonary infection
19040400001	Female	15	2019041619:02:32	Bronchitis
19041602875	Female	15	2019041619:56:35	Heat
17020402422	Male	15	2019041620:51:26	Respiratory infections
17020402422	Male	15	2019041620:51:26	Bacterial infection
17103101467	Female	15	2019041621:02:39	Bronchitis
17103101467	Female	15	2019041621:02:39	Lung infection?
17103101467	Female	15	2019041621:02:39	Cough
19040400001	Female	15	2019041709:33:17	Pulmonary infection
19040400001	Female	15	2019041709:33:17	Bronchitis
19041302451	Female	15	2019041712:15:58	Pulmonary infection
19041701955	Male	15	2019041713:46:50	Lumbar pain
17020402422	Male	15	2019041717:15:51	Respiratory infections
17020402422	Male	15	2019041717:15:51	Bacterial infection
19041703049	Male	15	2019041722:46:11	Heat
19041703049	Male	15	2019041722:46:11	Bacterial infection
19041703049	Male	15	2019041722:46:11	Upper respiratory tract infection
19040400001	Female	15	2019041806:55:52	Pulmonary infection
19040400001	Female	15	2019041806:55:52	Bronchitis
18082600166	Male	15	2019041808:10:12	Respiratory infections
19041801432	Male	15	2019041811:05:10	Hypertension
19041302451	Female	15	2019041812:03:09	Pulmonary infection
161230020243	Male	15	2019041812:13:31	Cough
19041802131	Male	15	2019041815:12:51	Respiratory infections
19041802295	Male	15	2019041816:21:33	Acute respiratory bronchitis
17020402422	Male	15	2019041817:02:04	Bacterial infection
17020402422	Male	15	2019041817:02:04	Respiratory infections
19041802479	Female	15	2019041818:31:32	Viral infection
19041802479	Female	15	2019041818:31:32	White cell reduction
19041802479	Female	15	2019041818:31:32	Respiratory infections
19041802479	Female	15	2019041818:31:32	Heat
19040400001	Female	15	2019041906:34:24	Pulmonary infection
19041900415	Female	15	2019041907:38:02	Gastritis
19041900415	Female	15	2019041907:38:02	Chest pain
161230020243	Male	15	2019041910:29:14	Cough
161230020243	Male	15	2019041910:29:14	Respiratory infections
19041302451	Female	15	2019041912:12:03	Pulmonary infection
19041300051	Female	15	2019041917:02:25	Bacterial infection
19041300051	Female	15	2019041917:02:25	Pulmonary infection
19041802479	Female	15	2019041919:18:52	Viral infection
19041802479	Female	15	2019041919:18:52	Heat
19041802479	Female	15	2019041919:18:52	White cell reduction
19041802479	Female	15	2019041919:18:52	Respiratory infections
17010700657	Male	15	2019041919:54:02	Respiratory infections
17010700657	Male	15	2019041919:54:02	Heat
19041902630	Male	15	2019041921:00:00	Lumbar pain
19030601745	Female	15	2019041923:55:43	The arterial catheter is not closed
19030601745	Female	15	2019041923:55:43	Heart failure
19040400001	Female	15	2019042006:53:46	Pulmonary infection
161230020243	Male	15	2019042009:15:41	Asthma bronchitis
161230020243	Male	15	2019042009:15:41	Cough
161230020243	Male	15	2019042009:15:41	Bronchitis
17010700657	Male	15	2019042009:25:37	Respiratory infections
19042000884	Female	15	2019042009:33:39	Respiratory infections
19042000884	Female	15	2019042009:33:39	Heat
19042001399	Female	15	2019042011:52:08	Diarrhea
19042001399	Female	15	2019042011:52:08	Disgusting
19041802479	Female	15	2019042012:57:06	White cell reduction
19041802479	Female	15	2019042012:57:06	Respiratory infections
19041802479	Female	15	2019042012:57:06	Viral infection
19042001990	Male	15	2019042016:03:16	Respiratory infections
19042002076	Male	15	2019042016:52:22	Upper respiratory tract infection
19042002076	Male	15	2019042016:52:22	Bronchitis
19042002438	Male	15	2019042021:30:06	Pulmonary infection
19042002438	Male	15	2019042021:30:06	Bacterial infection
19042002438	Male	15	2019042021:30:06	Cough
19040400001	Female	15	2019042106:44:34	Bronchitis
19040400001	Female	15	2019042106:44:34	Pulmonary infection
19042100965	Female	15	2019042110:32:13	Bronchitis
19042100965	Female	15	2019042110:32:13	Upper respiratory tract infection
19032900029	Male	15	2019042116:29:39	Pulmonary infection
19042101831	Female	15	2019042118:17:09	Medical examination
19042101883	Male	15	2019042118:58:50	Bronchitis
19042101883	Male	15	2019042118:58:50	Heat
19042201453	Male	15	2019042210:32:35	Dizziness
19042002438	Male	15	2019042210:51:15	Pulmonary infection
19042002438	Male	15	2019042210:51:15	Bacterial infection
19040400001	Female	15	2019042211:29:52	Pulmonary infection
19042201767	Male	15	2019042211:36:24	Loss of consciousness
17122400539	Male	15	2019042217:10:00	Viral infection
17122400539	Male	15	2019042217:10:00	Heat
19040400001	Female	15	2019042306:45:06	Pulmonary infection
19042301507	Female	15	2019042312:53:21	Heat
19042301507	Female	15	2019042312:53:21	Be palpitations
19042301703	Male	15	2019042313:56:21	Viral infection
19042301703	Male	15	2019042313:56:21	Infectious fever
19042002438	Male	15	2019042317:02:43	Bacterial infection
19042002438	Male	15	2019042317:02:43	Pulmonary infection
19042401456	Male	15	2019042411:26:33	Respiratory infections
19040400001	Female	15	2019042412:42:24	Pulmonary infection
19042002438	Male	15	2019042417:10:17	Bacterial infection
19042002438	Male	15	2019042417:10:17	Pulmonary infection
19042402465	Female	15	2019042419:26:45	Respiratory infections
19042101883	Male	15	2019042419:55:59	Bronchitis
19042402565	Male	15	2019042420:39:36	Er
19042402565	Male	15	2019042420:39:36	Cough
19010402759	Female	15	2019042506:54:56	Respiratory infections
19040400001	Female	15	2019042510:22:02	Pulmonary infection
19042502162	Male	15	2019042516:17:41	Bronchitis
19042502560	Female	15	2019042520:53:24	Bronchitis
19042502560	Female	15	2019042520:53:24	Cough
19042502673	Male	15	2019042522:42:03	Heat
19042502673	Male	15	2019042522:42:03	Cough
161230071663	Male	15	2019042613:31:17	Health check
19042602010	Male	15	2019042616:29:33	Gastritis
19042602010	Male	15	2019042616:29:33	Abdominal pain
19042602097	Male	15	2019042617:31:30	Respiratory infections
19042602097	Male	15	2019042617:31:30	Heat
19042501858	Male	15	2019042620:02:26	Heat
19042602336	Male	15	2019042620:43:15	Respiratory infections
19042700023	Female	15	2019042701:25:05	Respiratory infections
19042700023	Female	15	2019042701:25:05	Heat
19041201878	Female	15	2019042708:11:40	Abdominal pain
19042500892	Female	15	2019042708:46:00	Respiratory infections
17010700657	Male	15	2019042711:35:29	Hyperthyroidism
19042501858	Male	15	2019042715:58:09	Viral infection
19042501858	Male	15	2019042715:58:09	Heat
19042702084	Female	15	2019042719:45:24	Respiratory infections
19042702084	Female	15	2019042719:45:24	Disgusting
19042702084	Female	15	2019042719:45:24	Heat
19042702146	Female	15	2019042720:35:38	Respiratory infections
19042702254	Female	15	2019042722:50:40	Respiratory infections
19042702263	Female	15	2019042723:09:27	Bacterial infection
19042702263	Female	15	2019042723:09:27	Acute gastritis
19042702263	Female	15	2019042723:09:27	Abdominal pain
19042501858	Male	15	2019042815:23:35	Viral infection
19042501858	Male	15	2019042815:23:35	Heat
19042702263	Female	15	2019042816:38:55	Abdominal pain
19042702263	Female	15	2019042816:38:55	Bacterial infection
19042702263	Female	15	2019042816:38:55	Acute gastritis
19042602010	Male	15	2019042818:19:46	Gastritis
19042602010	Male	15	2019042818:19:46	Abdominal pain
19042900291	Female	15	2019042907:19:57	Bronchitis
19042900291	Female	15	2019042907:19:57	Heat
19042900291	Female	15	2019042907:19:57	Viral infection
19042900291	Female	15	2019042907:19:57	Ketosis
19042900871	Male	15	2019042909:37:36	Bacterial infection
19042900871	Male	15	2019042909:37:36	Acute gastritis
19042900871	Male	15	2019042909:37:36	Abdominal pain
19042901745	Male	15	2019042912:48:05	Heat
18012501601	Female	15	2019042914:46:53	Bronchitis
18012501601	Female	15	2019042914:46:53	Upper respiratory tract infection
19042902302	Female	15	2019042915:42:14	Drowsiness
19043000009	Male	15	2019043000:42:18	Bacterial infection
19043000009	Male	15	2019043000:42:18	Gastritis
19043000009	Male	15	2019043000:42:18	Nausea and vomiting
18040201893	Female	15	2019043007:01:11	Hyperthyroidism
19043000009	Male	15	2019043015:15:45	Gastritis
19043000009	Male	15	2019043015:15:45	Bacterial infection
19043000009	Male	15	2019043015:15:45	Nausea and vomiting
19042702263	Female	15	2019043016:22:19	Acute gastritis
19042702263	Female	15	2019043016:22:19	Bacterial infection
19042702263	Female	15	2019043016:22:19	Abdominal pain
19043002203	Female	15	2019043018:06:54	Bacterial infection
19043002203	Female	15	2019043018:06:54	Disgusting
19043002203	Female	15	2019043018:06:54	Heat
19042900291	Female	15	2019043018:55:42	Heat
19042900291	Female	15	2019043018:55:42	Bronchitis
19042900291	Female	15	2019050113:50:55	Heat
19042900291	Female	15	2019050113:50:55	Viral infection
19042900291	Female	15	2019050113:50:55	Bronchitis
19050101297	Male	15	2019050116:20:32	Pulmonary infection
19050101415	Female	15	2019050117:53:29	Respiratory infections
19050200003	Female	15	2019050200:15:27	Respiratory infections
19050200486	Female	15	2019050212:30:05	Pulmonary infection
19050200486	Female	15	2019050212:30:05	Bronchitis
19050101297	Male	15	2019050218:27:38	Pulmonary infection
17122400539	Male	15	2019050219:05:22	Bronchitis
17122400539	Male	15	2019050219:05:22	Cough
19050300035	Female	15	2019050302:58:10	Asthma bronchitis
19050200486	Female	15	2019050308:47:58	Pulmonary infection
19050200486	Female	15	2019050308:47:58	Bronchitis
161230071663	Male	15	2019050309:51:17	Health check
19050301598	Female	15	2019050313:38:40	Cough
19050301724	Female	15	2019050314:23:46	Acute sore throat
19011601135	Male	15	2019050314:29:41	Respiratory infections
18092400181	Male	15	2019050316:29:10	Respiratory infections
19050101297	Male	15	2019050317:24:06	Pulmonary infection
19050302401	Male	15	2019050322:44:05	Oesophagitis
19050302401	Male	15	2019050322:44:05	Foreign material in the digestive tract
19050300035	Female	15	2019050406:28:28	Asthma bronchitis
19050400539	Male	15	2019050408:12:50	Heat
19050400539	Male	15	2019050408:12:50	Acute gastric mucosal disease
19050400539	Male	15	2019050408:12:50	Disgusting
19050401132	Male	15	2019050410:44:53	Gastritis
19050401132	Male	15	2019050410:44:53	Abdominal pain
19050401462	Male	15	2019050412:44:06	Bronchitis
19050401462	Male	15	2019050412:44:06	Heat
19050401462	Male	15	2019050412:44:06	Bacterial infection
19050401462	Male	15	2019050412:44:06	Cough
19050401714	Male	15	2019050414:24:15	Bacterial infection
19050401714	Male	15	2019050414:24:15	Bronchitis
19050401714	Male	15	2019050414:24:15	Respiratory infections
18092400181	Male	15	2019050414:56:40	Gastritis
19050401954	Male	15	2019050416:08:51	Chest stuffy
19050200486	Female	15	2019050416:25:51	Pulmonary infection
19050200486	Female	15	2019050416:25:51	Bronchitis
19050101297	Male	15	2019050417:09:50	Abdominal pain
19031701967	Female	15	2019050419:00:47	Lymph node inflammation
19031701967	Female	15	2019050419:00:47	Respiratory infections
19031701967	Female	15	2019050419:00:47	Heat
19050300035	Female	15	2019050506:47:11	Asthma bronchitis
19050200486	Female	15	2019050507:24:29	Bronchitis
19050200486	Female	15	2019050507:24:29	Pulmonary infection
19050101297	Male	15	2019050512:18:54	Pulmonary infection
17010213469	Male	15	2019050512:54:35	Bronchitis
19050400539	Male	15	2019050514:17:25	Heat
19050400539	Male	15	2019050514:17:25	Disgusting
19050400539	Male	15	2019050514:17:25	Acute gastric mucosal disease
19050502150	Male	15	2019050517:54:26	Hyperbilirubinemia
19050502150	Male	15	2019050517:54:26	Headache
19050502150	Male	15	2019050517:54:26	Vomiting
19050502150	Male	15	2019050517:54:26	Gastric mucosal lesions
18091601297	Female	15	2019050520:50:54	Respiratory infections
19033101416	Male	15	2019050522:47:09	Gastritis
19033101416	Male	15	2019050522:47:09	Abdominal pain
19033101416	Male	15	2019050522:47:09	Bacterial infection
19033101416	Male	15	2019050522:47:09	Diarrhea
19050200486	Female	15	2019050607:47:27	Pulmonary infection
19050200486	Female	15	2019050607:47:27	Bronchitis
19050601588	Male	15	2019050610:37:52	Bacterial infection
19050601588	Male	15	2019050610:37:52	Chest pain
161230071663	Male	15	2019050613:40:09	Hyperbilirubinemia
17010213469	Male	15	2019050615:34:42	Bronchitis
19050101297	Male	15	2019050616:18:43	Pulmonary infection
18092400181	Male	15	2019050616:58:29	Vomiting
18072501807	Female	15	2019050617:27:12	Respiratory infections
19050603035	Female	15	2019050619:58:53	Respiratory infections
19050200486	Female	15	2019050707:58:23	Bronchitis
19050200486	Female	15	2019050707:58:23	Pulmonary infection
17010213469	Male	15	2019050715:28:55	Bronchitis
19050101297	Male	15	2019050717:27:54	Pulmonary infection
19050702576	Male	15	2019050718:20:10	Abdominal pain
19050702576	Male	15	2019050718:20:10	Digestive bleeding
19050702576	Male	15	2019050718:20:10	Allergic purpura
19042500892	Female	15	2019050719:55:10	Abdominal pain
19050702960	Male	15	2019050722:47:10	Abdominal pain
19050200486	Female	15	2019050807:51:41	Bronchitis
19050200486	Female	15	2019050807:51:41	Pulmonary infection
19050802178	Female	15	2019050814:44:06	Heart function is not complete
19050802178	Female	15	2019050814:44:06	Gastritis
19050802178	Female	15	2019050814:44:06	Myocarditis?
19050802178	Female	15	2019050814:44:06	Electrolyte metabolism disorders
17010213469	Male	15	2019050817:13:49	Bronchitis
19050900017	Female	15	2019050901:16:21	Respiratory infections
19050601991	Female	15	2019050907:03:22	Hair loss
19050901297	Male	15	2019050910:29:34	Acute gastritis
19050901297	Male	15	2019050910:29:34	Abdominal pain
18072501807	Female	15	2019050917:03:46	Respiratory infections
19050902667	Male	15	2019050918:44:07	Respiratory infections
18081600560	Female	15	2019051009:36:40	Diarrhea
18081600560	Female	15	2019051009:36:40	Bacterial infection
18081600560	Female	15	2019051009:36:40	Heat
19051101559	Female	15	2019051111:47:35	Gastritis
19051101559	Female	15	2019051111:47:35	Diarrhea
19050702576	Male	15	2019051112:26:20	Bacterial infection
19050702576	Male	15	2019051112:26:20	Allergic purpura
19050702576	Male	15	2019051112:26:20	Digestive bleeding
19050702576	Male	15	2019051112:26:20	Abdominal pain
19051101792	Female	15	2019051113:47:53	Thyroid nodule
19051101792	Female	15	2019051113:47:53	Abnormal thyroid function
19051201896	Male	15	2019051218:57:52	Pulmonary infection
19051201896	Male	15	2019051218:57:52	Cough
19051201814	Male	15	2019051219:54:02	Viral infection
19051201814	Male	15	2019051219:54:02	Respiratory infections
19051201814	Male	15	2019051219:54:02	Heat
19051202059	Female	15	2019051221:07:24	Pulmonary infection
19051202059	Female	15	2019051221:07:24	Cough
18113000327	Male	15	2019051222:05:00	Heat
19051300614	Female	15	2019051308:09:02	Bronchitis
19051300614	Female	15	2019051308:09:02	Mickory inflammation
19051202059	Female	15	2019051310:54:14	Pulmonary infection
19051302434	Male	15	2019051315:12:22	Chest stuffy
19051302992	Male	15	2019051319:52:56	Chest stuffy
161230092805	Male	15	2019051320:18:46	Asthma
19051401386	Female	15	2019051410:51:28	Abdominal pain
19051202059	Female	15	2019051411:59:10	Pulmonary infection
19051401623	Male	15	2019051413:16:28	Bacterial infection
19051401623	Male	15	2019051413:16:28	Syncope
161230092805	Male	15	2019051419:36:13	Asthma
18120100212	Male	15	2019051423:10:22	Influenza a
18120100212	Male	15	2019051423:10:22	Heat
19051500077	Female	15	2019051506:24:28	Acute gastritis
19051500077	Female	15	2019051506:24:28	Urinary tract infection
19051500077	Female	15	2019051506:24:28	Abdominal pain
19051500077	Female	15	2019051506:24:28	Ketosis
18011802247	Female	15	2019051507:37:59	Ketosis
18011802247	Female	15	2019051507:37:59	Gastritis
18011802247	Female	15	2019051507:37:59	Diarrhea
19051202059	Female	15	2019051512:47:50	Pulmonary infection
161230092805	Male	15	2019051517:08:38	Asthma
19051502931	Female	15	2019051520:41:14	Drug poisoning
18011802247	Female	15	2019051607:15:44	Ketosis
18011802247	Female	15	2019051607:15:44	Bacterial infection
18011802247	Female	15	2019051607:15:44	Diarrhea
18011802247	Female	15	2019051607:15:44	Gastritis
19051602328	Female	15	2019051616:47:14	Respiratory infections
19042700373	Male	15	2019051617:16:16	Respiratory infections
19042700373	Male	15	2019051617:16:16	Heat
161230092805	Male	15	2019051620:24:33	Asthma
19051700029	Male	15	2019051702:32:06	Respiratory infections
19051700029	Male	15	2019051702:32:06	Viral infection
18011802247	Female	15	2019051709:47:13	Ketosis
18011802247	Female	15	2019051709:47:13	Gastritis
18011802247	Female	15	2019051709:47:13	Diarrhea
19051401386	Female	15	2019051710:30:35	Abdominal pain
19051702131	Female	15	2019051715:58:40	Chest stuffy
19051702269	Male	15	2019051717:28:12	Bacterial infection
19051702269	Male	15	2019051717:28:12	Infectious fever
161230092805	Male	15	2019051718:34:46	Asthma
19051800708	Female	15	2019051808:53:56	Respiratory infections
19051801161	Male	15	2019051810:29:08	Respiratory infections
19051801249	Female	15	2019051810:49:54	Vomiting
19051801249	Female	15	2019051810:49:54	Respiratory infections
19051801249	Female	15	2019051810:49:54	Diarrhea
161230092805	Male	15	2019051817:31:53	Asthma
19051202059	Female	15	2019051818:02:39	Pulmonary infection
19051802390	Male	15	2019051822:10:32	Chest pain
19051802395	Male	15	2019051822:15:59	Infectious fever
19050702576	Male	15	2019051908:00:56	Bacterial infection
19050702576	Male	15	2019051908:00:56	Allergic purpura
19050702576	Male	15	2019051908:00:56	Abdominal pain
19050702576	Male	15	2019051908:00:56	Digestive bleeding
19051901716	Female	15	2019051917:15:30	Respiratory infections
161230092805	Male	15	2019051917:28:53	Asthma
18040100365	Female	15	2019051923:13:55	Bacterial infection
18040100365	Female	15	2019051923:13:55	Headache
18040100365	Female	15	2019051923:13:55	Vomiting
16123179787	Female	15	2019052000:30:01	Chest pain
19052000162	Female	15	2019052006:49:21	Acute abscess pachian inflammation
19052001048	Female	15	2019052009:36:57	Pneumonia
19052001048	Female	15	2019052009:36:57	Cough
19051601712	Female	15	2019052013:20:35	Chest stuffy
19052100043	Female	15	2019052104:58:45	Skin infection
19052100043	Female	15	2019052104:58:45	Purpura
19052100043	Female	15	2019052104:58:45	Gastritis
19052100043	Female	15	2019052104:58:57	Mixed allergic purpura
19052100043	Female	15	2019052104:58:57	Acute mucosal lesions with bleeding?
19052100043	Female	15	2019052104:58:57	Abdominal pain
18110602403	Female	15	2019052111:10:55	Gastritis
18110602403	Female	15	2019052111:10:55	Abdominal pain
19052101662	Male	15	2019052112:52:05	Abdominal pain
19030802281	Female	15	2019052116:44:54	Respiratory infections
19052102534	Female	15	2019052119:41:48	Respiratory infections
19052200007	Female	15	2019052200:13:42	Bronchitis
19052200007	Female	15	2019052200:13:42	Cough
19052200047	Male	15	2019052204:02:13	Abdominal pain
19052200571	Female	15	2019052211:27:21	Pulmonary infection
19052200571	Female	15	2019052211:27:21	Cough
19052202350	Male	15	2019052216:46:09	Acute leukemia
161230020052	Female	15	2019052218:01:26	Sore throat
161230120840	Male	15	2019052219:45:31	Respiratory infections
161230120840	Male	15	2019052300:02:02	Respiratory infections
161230120840	Male	15	2019052300:02:02	Bacterial infection
19052300735	Male	15	2019052308:34:46	Intestinal infection
19052300735	Male	15	2019052308:34:46	Diarrhea
19052300735	Male	15	2019052308:34:46	Heat
19052300735	Male	15	2019052308:34:46	Bacterial infection
19052200571	Female	15	2019052310:18:28	Pulmonary infection
161230069771	Female	15	2019052313:02:05	Chest stuffy
19052302221	Male	15	2019052316:15:00	Chest stuffy
19051501457	Female	15	2019052409:13:36	Chest stuffy
19052200571	Female	15	2019052413:23:56	Pulmonary infection
19052102534	Female	15	2019052418:47:17	Respiratory infections
19052402291	Female	15	2019052419:20:54	Cough
19052402291	Female	15	2019052419:20:54	Respiratory infections
19052402291	Female	15	2019052419:20:54	Anemia
19052402371	Female	15	2019052420:16:22	Respiratory infections
19052402371	Female	15	2019052420:16:22	Heat
19052200571	Female	15	2019052510:21:33	Pulmonary infection
19051501457	Female	15	2019052510:55:22	Be palpitations
19051501457	Female	15	2019052510:55:22	Chest stuffy
19052501535	Female	15	2019052512:11:17	Respiratory infections
19022702413	Female	15	2019052515:49:01	Upper respiratory tract infection
19052402371	Female	15	2019052520:13:05	Respiratory infections
19052402371	Female	15	2019052520:13:05	Heat
19052502574	Male	15	2019052523:03:58	Gastritis
19052502574	Male	15	2019052523:03:58	Diarrhea
19052502574	Male	15	2019052523:03:58	Bacterial infection
19052200571	Female	15	2019052609:53:52	Pulmonary infection
18111800332	Male	15	2019052614:30:10	Bronchitis
18111800332	Male	15	2019052614:30:10	Respiratory infections
19013001379	Female	15	2019052619:41:15	Foreign matter in pharynx?
19052402371	Female	15	2019052620:28:15	Respiratory infections
19052402371	Female	15	2019052620:28:15	Heat
19030502320	Male	15	2019052705:46:11	Bacterial infection
19030502320	Male	15	2019052705:46:11	Infectious fever
19052700308	Male	15	2019052707:17:14	Malnutrition
19052700308	Male	15	2019052707:17:14	Syncope
19052701251	Female	15	2019052710:17:59	Disgusting
19052200571	Female	15	2019052712:04:17	Pulmonary infection
19052702604	Female	15	2019052719:20:04	Abdominal pain
19052702633	Male	15	2019052719:34:25	Respiratory infections
19052402371	Female	15	2019052720:16:05	Respiratory infections
19052702845	Female	15	2019052721:52:05	Abdominal pain
19052200571	Female	15	2019052814:21:51	Pulmonary infection
19010100574	Female	15	2019052816:11:07	Respiratory infections
19010100574	Female	15	2019052816:11:07	Cough
19052402371	Female	15	2019052820:33:21	Respiratory infections
19052802834	Female	15	2019052900:01:12	Cough
19052901694	Female	15	2019052913:07:20	Gastric mucosal lesions
19052901694	Female	15	2019052913:07:20	Abdominal pain
19052901918	Female	15	2019052914:25:39	Chest stuffy
19052200571	Female	15	2019052915:26:08	Pulmonary infection
19052902524	Male	15	2019052919:46:10	Respiratory infections
19052402371	Female	15	2019052920:14:05	Respiratory infections
19052402371	Female	15	2019052920:14:05	Gastric mucosal lesions
19052902644	Male	15	2019052921:22:49	Infectious fever
19052902644	Male	15	2019052921:22:49	Pulmonary infection
19052902644	Male	15	2019052921:22:49	Respiratory infections
19053000292	Male	15	2019053007:12:39	Respiratory infections
17010213469	Male	15	2019053008:49:18	Bronchitis
19053001538	Female	15	2019053011:32:48	Abdominal pain
19053001538	Female	15	2019053011:32:48	Gastritis
19053002070	Male	15	2019053015:13:39	Electrolyte metabolism disorders
19053002070	Male	15	2019053015:13:39	Bone tumors
19052200571	Female	15	2019053016:46:23	Pulmonary infection
19052902644	Male	15	2019053018:58:49	Pulmonary infection
19052200571	Female	15	2019053117:44:26	Pulmonary infection
19052902644	Male	15	2019053118:19:26	Respiratory infections
19052902644	Male	15	2019053118:19:26	Pulmonary infection
19053102388	Female	15	2019053122:18:05	Bronchitis
19053102388	Female	15	2019053122:18:05	Cough
161230020052	Female	15	2019060115:04:25	Lymph node inflammation
19052902644	Male	15	2019060115:42:12	Pulmonary infection
19060102276	Female	15	2019060119:51:25	Abdominal pain
161230019723	Male	15	2019060120:46:16	Respiratory infections
19060102471	Female	15	2019060123:47:29	Bacterial infection
19060102471	Female	15	2019060123:47:29	Heat
19060200024	Male	15	2019060201:14:24	Bacterial infection
19060200024	Male	15	2019060201:14:24	Heat
19032401782	Female	15	2019060210:46:33	Abdominal pain
19060200922	Male	15	2019060210:49:22	Pneumonia
19060200922	Male	15	2019060210:49:22	Respiratory infections
19053002670	Male	15	2019060214:49:55	Anemia
19052902644	Male	15	2019060219:34:42	Pulmonary infection
19053002670	Male	15	2019060316:42:14	Anemia
19052902644	Male	15	2019060318:51:45	Pulmonary infection
19060302614	Female	15	2019060319:09:00	Abdominal pain
19060302614	Female	15	2019060319:09:00	Gastritis
19060401399	Male	15	2019060411:21:40	Gastritis
19060401399	Male	15	2019060411:21:40	Abdominal pain
19052902644	Male	15	2019060419:48:24	Pulmonary infection
19060502272	Female	15	2019060517:26:51	Bronchitis
19060600405	Female	15	2019060607:47:37	Abdominal pain
19060600405	Female	15	2019060607:47:37	Bacterial infection
19060601984	Male	15	2019060617:05:44	Pneumonia
19060601984	Male	15	2019060617:05:44	Infectious fever
19060700778	Female	15	2019060710:35:24	Respiratory infections
19060700778	Female	15	2019060710:35:24	Pain
19060700949	Female	15	2019060712:25:04	Pulmonary infection
19060700949	Female	15	2019060712:25:04	Bronchitis
19060701708	Male	15	2019060723:14:15	Liver damage
19060701708	Male	15	2019060723:14:15	T-muscular solubility
19060701708	Male	15	2019060808:16:42	T-muscular solubility
19060701708	Male	15	2019060808:16:42	Abnormal liver function
19060800806	Female	15	2019060809:09:12	Bronchitis
19060800806	Female	15	2019060809:09:12	Respiratory infections
19060800806	Female	15	2019060809:09:12	Bacterial infection
19060700949	Female	15	2019060812:27:58	Pulmonary infection
19060900873	Female	15	2019060910:52:41	Bacterial infection
19060900873	Female	15	2019060910:52:41	Acute throat inflammation
19060700949	Female	15	2019060912:40:27	Pulmonary infection
17010277851	Female	15	2019060914:30:38	Respiratory infections
19060901741	Female	15	2019060919:54:25	Gastritis
19060901741	Female	15	2019060919:54:25	Bacterial infection
19060901741	Female	15	2019060919:54:25	Diarrhea
18032700073	Male	15	2019060921:13:51	Respiratory infections
19061000025	Male	15	2019061001:53:43	Bacterial infection
19061000025	Male	15	2019061001:53:43	Abdominal pain
19060700949	Female	15	2019061010:40:34	Pulmonary infection
19061002104	Female	15	2019061014:38:38	Food poisoning?
19013101251	Male	15	2019061021:57:19	Respiratory infections
19013101251	Male	15	2019061021:57:19	Bacterial infection
19022702671	Female	15	2019061101:00:24	Abdominal pain
19061100317	Male	15	2019061107:29:44	Pain
19061100317	Male	15	2019061107:29:44	Respiratory infections
17112301387	Male	15	2019061108:55:48	Bacterial infection
17112301387	Male	15	2019061108:55:48	Heat
19061100848	Female	15	2019061108:58:28	Allergic purpura
19060900873	Female	15	2019061110:37:03	Bacterial infection
19060900873	Female	15	2019061110:37:03	Acute throat inflammation
19061101649	Male	15	2019061112:28:18	Syncope
19061102524	Male	15	2019061118:31:09	Heat
18041900329	Female	15	2019061121:57:12	Abdominal pain
18041900329	Female	15	2019061121:57:12	Vomiting
18041900329	Female	15	2019061121:57:12	Gastric mucosal lesions
19061200017	Male	15	2019061201:11:31	Bacterial infection
19061200017	Male	15	2019061201:11:31	Hypokalemia
19061200017	Male	15	2019061201:11:31	Respiratory infections
19061200017	Male	15	2019061201:11:31	Acute gastric mucosal disease
19061200017	Male	15	2019061201:11:31	Systemic inflammatory response syndrome
19061200017	Male	15	2019061201:11:31	Diarrhea
19061100317	Male	15	2019061207:53:49	Bacterial infection
19061100317	Male	15	2019061207:53:49	Respiratory infections
19061201653	Female	15	2019061212:25:42	Abdominal pain
19061201828	Female	15	2019061214:53:05	Gastritis
19061201828	Female	15	2019061214:53:05	Abdominal pain
19061200017	Male	15	2019061220:40:56	Acute gastric mucosal disease
19061200017	Male	15	2019061220:40:56	Bacterial infection
19061200017	Male	15	2019061220:40:56	Respiratory infections
19061200017	Male	15	2019061220:40:56	Systemic inflammatory response syndrome
19061200017	Male	15	2019061220:40:56	Diarrhea
19061100317	Male	15	2019061308:20:25	Bacterial infection
19061100317	Male	15	2019061308:20:25	Respiratory infections
19061200017	Male	15	2019061314:39:26	Acute gastric mucosal disease
19061200017	Male	15	2019061314:39:26	Bacterial infection
19061200017	Male	15	2019061314:39:26	Respiratory infections
19061200017	Male	15	2019061314:39:26	Diarrhea
19061200017	Male	15	2019061314:39:26	Systemic inflammatory response syndrome
19013101251	Male	15	2019061317:37:12	Cough
19013101251	Male	15	2019061317:37:12	Respiratory infections
[truncated: 402,967+ more rows]
