# Supplementary material for: Dynamic changes of emergency visits: a retrospective observational study
Source: BMC Emerg Med. 2022 Jun 11;22:105. doi: 10.1186/s12873-022-00654-0 (PMC9187931; doi:10.1186/s12873-022-00654-0)
Supplement: Supplementary file 4 — Additional file 4. [file 12873_2022_654_MOESM4_ESM.xlsx]

## Sheet: Sheet1
Medical Record No.	Gender	Age	Date of Admission	Principal Diagnosis
20021100135	Male	0	2020021109:41:49	Respiratory heart beat stops
20122901472	Female	2	2020122914:45:48	Medical examination
20122200837	Female	3	2020122219:04:31	Upper respiratory tract infection
20122200837	Female	3	2020122219:04:31	Bacterial infection
20122901775	Female	3	2020122917:10:00	Medical examination
20092402404	Male	4	2020092420:04:05	Dizziness
19121201402	Male	4	2020102210:27:04	Respiratory infections
20101900861	Male	4	2020112719:12:50	Bacterial infection
20101900861	Male	4	2020112719:12:50	Vomiting
20101900861	Male	4	2020112719:12:50	Heat
18022001409	Female	5	2020102414:42:17	Electrolyte metabolism disorders
19121202525	Male	6	2020010312:10:00	Upper respiratory tract infection
19121202525	Male	6	2020011912:24:36	Bacterial infection
19121202525	Male	6	2020011912:24:36	Upper respiratory tract infection
20081101561	Female	6	2020081113:21:37	Upper respiratory tract infection
20090501889	Male	6	2020090515:15:12	Bleeding of the nose
20090501889	Male	6	2020090515:15:12	Laboratory inspections
16123178025	Female	8	2020011610:29:58	Mickory inflammation
16123178025	Female	8	2020011610:29:58	Upper respiratory tract infection
16123178025	Female	8	2020011806:40:10	Mickory inflammation
16123178025	Female	8	2020011806:40:10	Diarrhea
16123178025	Female	8	2020011806:40:10	Upper respiratory tract infection
19032702386	Male	8	2020050209:41:49	Heat
19032702386	Male	8	2020050209:41:49	Upper respiratory tract infection
20081100721	Male	8	2020081109:14:15	Ureq
20083102951	Female	8	2020083121:13:18	Medical examination
161230035694	Male	8	2020102307:47:23	Heat
161230035694	Male	8	2020102307:49:17	Heat
20111100443	Female	8	2020111108:30:43	Respiratory infections
20122600378	Female	8	2020122710:09:13	Respiratory infections
20122600378	Female	8	2020122710:09:13	Diopter is not correct
20103102315	Male	9	2020103121:03:29	Dizziness
19042401680	Male	10	2020072016:38:44	Upper respiratory tract infection
20012000262	Male	13	2020022007:53:44	Heat
20012000262	Male	13	2020022007:53:44	Liver damage
20052102127	Female	13	2020052119:48:26	Anemia
20052102127	Female	13	2020052119:48:26	Bleeding of the nose
20052102312	Female	13	2020052121:21:49	Anemia
20052102312	Female	13	2020052121:21:49	Bleeding of the nose
20071402283	Male	13	2020071507:42:33	Dry mouth
20081501110	Male	13	2020081511:52:30	Dwarbiosis
20082001568	Male	13	2020082013:52:35	Syncope
17102201566	Female	13	2020110409:06:27	Bacterial infection
17102201566	Female	13	2020110409:06:27	Acute laryngitis
19072001307	Male	13	2020112114:30:32	Medical examination
19072001310	Male	13	2020112114:31:19	Medical examination
20011100292	Male	14	2020011107:36:14	Respiratory infections
20011301495	Male	14	2020011313:32:43	Respiratory infections
20011601073	Female	14	2020011611:41:44	Respiratory infections
20011700004	Female	14	2020011700:12:07	Bacterial infection
20011700004	Female	14	2020011700:12:07	Abdominal pain
20030501109	Female	14	2020030516:25:08	Respiratory infections
20040401493	Male	14	2020040423:35:48	Abdominal pain
20041901003	Male	14	2020041912:45:36	Foreign object in esophagus
19041802604	Male	14	2020042221:04:09	Abdominal pain
20032900011	Female	14	2020042320:45:49	Diarrhea
20043001635	Female	14	2020043016:52:54	Chest stuffy
20050201477	Male	14	2020050215:16:03	Chest pain
17051503495	Male	14	2020050717:49:44	Gastritis
17051503495	Male	14	2020050717:49:44	Abdominal pain
20050902329	Male	14	2020050923:54:01	Dizziness
20050902329	Male	14	2020050923:54:01	Hives?
19102100095	Male	14	2020051017:41:35	Chest pain
20051701450	Male	14	2020051716:00:35	Medical examination
20051702119	Female	14	2020051722:50:05	Drug poisoning
20052100555	Female	14	2020052109:09:30	Chest pain
20052101755	Female	14	2020052115:50:07	Abdominal pain
161230020122	Male	14	2020052214:40:57	Abdominal pain
161230020122	Male	14	2020052214:40:57	Gastritis
20052702050	Female	14	2020052717:21:57	Ketosis
20052702050	Female	14	2020052717:21:57	Acute gastritis
20052702050	Female	14	2020052717:21:57	Bacterial infection
20052702050	Female	14	2020052717:21:57	Nausea and vomiting
20052800033	Female	14	2020052805:39:04	Chest stuffy
20052901710	Male	14	2020052916:05:48	Abdominal pain
20052902057	Male	14	2020052919:52:51	Vomiting
20052800033	Female	14	2020053013:02:27	Be palpitations
20060201329	Female	14	2020060213:22:19	Nausea and vomiting
20060201329	Female	14	2020060213:22:19	Gastritis?
20060202277	Male	14	2020060221:05:26	Abdominal pain
20060202277	Male	14	2020060221:05:26	Bacterial infection
20060401747	Male	14	2020060414:37:22	Health check
20060600582	Female	14	2020060608:46:28	Haematuria
20060502305	Male	14	2020060614:32:02	Abdominal pain
20061100729	Female	14	2020061110:11:29	Abdominal pain
20061702408	Male	14	2020061720:16:45	Chest stuffy
20061801800	Male	14	2020061817:44:15	Chest stuffy
20061902104	Male	14	2020061922:58:56	Dizziness
20062100925	Male	14	2020062113:07:51	Chest stuffy
20062200767	Female	14	2020062422:07:20	Viral rash
20070300444	Female	14	2020070308:22:54	Heat
20070602852	Male	14	2020070702:51:17	Heat
20070602852	Male	14	2020070702:51:17	Bacterial infection
20070602852	Male	14	2020070702:51:17	Abdominal pain
20070901072	Male	14	2020070911:44:47	Be palpitations
20071600894	Male	14	2020071808:24:50	Chest stuffy
20072600019	Female	14	2020072601:47:33	Bacterial infection
20072600019	Female	14	2020072601:47:33	Heat
20081200010	Male	14	2020081200:41:26	Drug poisoning
20082001534	Male	14	2020082014:22:11	Respiratory infections
20082202477	Female	14	2020082222:07:31	Respiratory infections
20082602132	Male	14	2020082616:42:17	Abdominal pain
20082702481	Male	14	2020082719:55:10	Be palpitations
20082801352	Female	14	2020082812:15:52	Liver damage
20082801352	Female	14	2020082812:15:52	Viral infection
20082901629	Female	14	2020082913:55:46	Liver damage
20082901629	Female	14	2020082913:55:46	Viral infection
20083001266	Female	14	2020083013:59:23	Infectious fever
20083001266	Female	14	2020083013:59:23	Viral infection
20083001266	Female	14	2020083013:59:23	Liver damage
20083102116	Female	14	2020083115:01:53	Liver damage
20083102116	Female	14	2020083115:01:53	Viral infection
20090501060	Male	14	2020090510:32:08	Hypokalemia
17062202146	Male	14	2020090609:01:24	Bacterial infection
17062202146	Male	14	2020090609:01:24	Respiratory infections
20090700048	Male	14	2020090721:05:03	Respiratory infections
20090700048	Male	14	2020090721:05:03	Heat
20090700048	Male	14	2020090721:05:03	Bacterial infection
20090802671	Male	14	2020090820:07:37	Chest stuffy
20051102525	Male	14	2020090821:57:49	Heat
20051102525	Male	14	2020090821:57:49	Respiratory infections
20051102525	Male	14	2020090821:57:49	Bacterial infection
20090902676	Male	14	2020090920:31:25	Abdominal pain
20090902676	Male	14	2020090920:31:25	Diarrhea
20091002521	Male	14	2020091019:18:01	Lackluster
20091100419	Female	14	2020091108:24:08	Bacterial infection
20091100419	Female	14	2020091108:24:08	Breathing difficulties
20091100419	Female	14	2020091108:24:08	Respiratory infections
20091100528	Male	14	2020091109:29:35	Acute gastritis
20091100528	Male	14	2020091109:29:35	Abdominal pain
20091202447	Male	14	2020091220:30:31	Chest pain
20090702716	Male	14	2020091308:21:43	Respiratory infections
20090702716	Male	14	2020091308:21:43	Dizziness
20091602574	Male	14	2020091621:09:43	Chest pain
20091701545	Female	14	2020091713:22:22	Abdominal pain
20091701545	Female	14	2020091713:22:22	Vomiting
20091702397	Female	14	2020091719:25:18	Chest pain
19091402020	Female	14	2020091800:31:32	Cough
19091402020	Female	14	2020091800:31:32	Allergic dermatitis
20091802433	Male	14	2020091820:22:14	Bacterial infection
20091802433	Male	14	2020091820:22:14	Chest stuffy
20091802433	Male	14	2020091820:22:14	Respiratory infections
20091502417	Male	14	2020092122:48:22	Acute gastritis
20091502417	Male	14	2020092122:48:22	Urinary tract infection
20091502417	Male	14	2020092122:48:22	Nausea and vomiting
20091502417	Male	14	2020092122:48:22	Bacterial infection
20092202139	Male	14	2020092217:49:58	Abdominal pain
20092400724	Female	14	2020092409:45:15	Thrombocytopenia
19102601485	Male	14	2020092423:04:39	Arrhythmia
19102601485	Male	14	2020092423:04:39	Supraventricular tachycardia
20092701421	Female	14	2020092716:02:49	Chest pain
161230023625	Female	14	2020100420:53:48	Be palpitations
20090700038	Female	14	2020100802:18:55	Foreign object in esophagus
20010201788	Male	14	2020100920:17:59	Be palpitations
20091200154	Male	14	2020101315:11:07	Stomach ulcer
20101302427	Female	14	2020101316:39:58	Breathing
20101400625	Female	14	2020101408:57:18	Bacterial infection
20101400625	Female	14	2020101408:57:18	Acute gastritis
161230130492	Male	14	2020101409:47:13	Bacterial infection
161230130492	Male	14	2020101409:47:13	Diarrhea
20101401443	Female	14	2020101411:45:11	Intestinal bacterial group disorders
20101401443	Female	14	2020101411:45:11	Bacterial infection
20101401443	Female	14	2020101411:45:11	Acute gastritis
20101401443	Female	14	2020101411:45:11	Abdominal pain
20101701626	Female	14	2020101714:58:37	Chest pain
20102001610	Female	14	2020102013:50:33	Abdominal pain
18112300730	Female	14	2020102109:15:26	Bacterial infection
18112300730	Female	14	2020102109:15:26	Gastritis
18112300730	Female	14	2020102109:15:26	Abdominal pain
20101902337	Male	14	2020102112:14:54	Heat
20101902337	Male	14	2020102208:13:28	Bacterial infection
20101902337	Male	14	2020102208:13:28	Heat
20101902337	Male	14	2020102208:13:28	Acute gastritis
20101902337	Male	14	2020102208:13:28	Abdominal pain
19022400223	Male	14	2020102416:46:28	Lymph node inflammation
19022400223	Male	14	2020102416:46:28	Chest stuffy
20102502096	Female	14	2020102523:09:23	Abdominal pain
20102600196	Female	14	2020102607:23:12	Abdominal pain
20062200767	Female	14	2020102621:36:52	Chest pain
18022400426	Female	14	2020102815:49:46	Chest stuffy
20110200054	Female	14	2020110206:06:21	Abdominal pain
20110202987	Male	14	2020110221:23:43	Heat
20110202987	Male	14	2020110221:23:43	Bacterial infection
18082702024	Female	14	2020110320:54:00	Lackluster
20110701818	Female	14	2020110715:50:06	Gastritis?
161230034782	Male	14	2020110718:45:12	Proteinuria?
20110901967	Female	14	2020110915:03:53	Gastritis
20110901967	Female	14	2020110915:03:53	Abdominal pain
20110901967	Female	14	2020110915:03:53	Bacterial infection
20101200049	Female	14	2020111008:27:53	Anemia
20111002087	Female	14	2020111015:55:39	Gastritis
20111002087	Female	14	2020111015:55:39	Abdominal pain
20110800094	Female	14	2020111108:12:35	Chest pain
161230073229	Female	14	2020111117:15:09	Chest pain
20111200614	Female	14	2020111209:29:27	Myeloproliferative abnormal syndrome
20111200614	Female	14	2020111209:29:27	Anemia
20011000696	Female	14	2020111210:53:38	Abdominal pain
19122101039	Female	14	2020111214:19:37	Abdominal pain
20111300263	Male	14	2020111307:55:51	Diarrhea
20111300263	Male	14	2020111307:55:51	Vomiting
19021102439	Female	14	2020111416:00:01	Be palpitations
20111402329	Female	14	2020111420:47:58	Bronchitis
20111600039	Male	14	2020111604:17:28	Hypoproteinemia
20111600039	Male	14	2020111604:17:28	After appendicitis
20111600039	Male	14	2020111604:17:28	Nephrotic syndrome?
20111600039	Male	14	2020111604:17:28	Bacterial infection
20111602286	Female	14	2020111618:00:43	Abdominal pain
18052100508	Female	14	2020111708:31:37	Chest pain
20111700425	Male	14	2020111709:35:13	Disgusting
20111700425	Male	14	2020111709:35:13	Dizziness
20111702649	Female	14	2020111722:59:32	Asthma
20111702649	Female	14	2020111722:59:32	Respiratory alkaline poisoning
20111702649	Female	14	2020111722:59:32	Electrolyte metabolism disorders
20101902337	Male	14	2020111907:44:35	Blood
20111302810	Female	14	2020111914:25:39	Abdominal pain
19122101481	Female	14	2020111922:49:30	Anemia
19122101481	Female	14	2020111922:49:30	Abdominal pain
20112200648	Female	14	2020112210:25:54	Bacterial infection
20112200648	Female	14	2020112210:25:54	Foreign object in esophagus
20112200648	Female	14	2020112210:25:54	Mediastinal abscess?
20112200648	Female	14	2020112314:30:33	Mediastinal abscess?
20112200648	Female	14	2020112314:30:33	Bacterial infection
20112200648	Female	14	2020112314:30:33	Foreign object in esophagus
18112801734	Male	14	2020112415:49:35	Abdominal pain
20112502131	Female	14	2020112518:57:47	Bacterial infection
20112502131	Female	14	2020112518:57:47	Cough
20112502299	Male	14	2020112520:19:07	Abdominal pain
19071302222	Female	14	2020112611:46:26	Bacterial infection
19071302222	Female	14	2020112611:46:26	Ketosis
19071302222	Female	14	2020112611:46:26	Bloating
19071302222	Female	14	2020112611:46:26	Acute gastritis
19071302222	Female	14	2020112611:46:26	Stomach retention
161230073229	Female	14	2020112800:20:15	Abdominal pain
20112801027	Male	14	2020112812:12:52	Lackluster
20112801027	Male	14	2020112812:12:52	Gastric mucosal lesions
20091901970	Female	14	2020112907:46:26	Gastritis
20091901970	Female	14	2020112907:46:26	Abdominal pain
20112801132	Male	14	2020112910:32:32	Abdominal pain
20101200049	Female	14	2020120109:00:09	Anemia
20101200049	Female	14	2020120209:29:26	Anemia
20120200997	Male	14	2020120210:57:44	Abdominal pain
20111600039	Male	14	2020120308:52:27	Acute pancreatitis?
20111600039	Male	14	2020120308:52:27	Abdominal pain
20120300017	Male	14	2020120319:59:42	Bacterial infection
20120300017	Male	14	2020120319:59:42	Abdominal pain
20120300017	Male	14	2020120319:59:42	Heat
20111600039	Male	14	2020120406:54:08	Nephrotic syndrome
20111600039	Male	14	2020120406:54:08	Abdominal pain
19120502185	Male	14	2020120509:02:09	Be palpitations
161230063597	Female	14	2020120709:28:37	Bloating
161230063597	Female	14	2020120709:28:37	Gastritis
20120801355	Male	14	2020120812:42:59	Vomiting
20120801355	Male	14	2020120812:42:59	Chronic gastritis?
20121100281	Female	14	2020121108:10:46	Viral infection
20121100281	Female	14	2020121108:10:46	Heat to be checked
20121100281	Female	14	2020121108:10:46	Respiratory infections
20121101992	Male	14	2020121117:24:12	Asthma
20121400016	Female	14	2020121401:50:08	Abdominal pain
20052000349	Female	14	2020121408:55:03	Acute gastric mucosal disease
20052000349	Female	14	2020121408:55:03	Drug poisoning?
20052000349	Female	14	2020121408:55:03	Depression
19092401455	Female	14	2020121512:11:21	Chest stuffy
19092401455	Female	14	2020121512:11:21	Dizziness
20052000349	Female	14	2020121513:41:13	Drug poisoning?
17081301535	Male	14	2020121516:29:06	Gastritis
17081301535	Male	14	2020121516:29:06	Abdominal pain
17081301535	Male	14	2020121516:29:06	Bacterial infection
17010241647	Female	14	2020121816:59:35	Gastritis
17010241647	Female	14	2020121816:59:35	Abdominal pain
20121900573	Female	14	2020121909:35:14	Anemia
20121900573	Female	14	2020121909:35:14	Be palpitations
20122200622	Male	14	2020122209:28:40	Chest pain
20113000920	Female	14	2020122216:55:12	Be palpitations
20111100820	Female	14	2020122323:01:29	Anxiety depression
20111100820	Female	14	2020122323:01:29	Gastric mucosal lesions
20111100820	Female	14	2020122323:01:29	Drug poisoning?
20122400404	Female	14	2020122408:37:55	Abdominal pain
161230089897	Female	14	2020122411:39:00	Abdominal pain
161230089897	Female	14	2020122411:39:00	Gastritis
19032900811	Male	14	2020122415:53:28	Liver function is not complete
17112402146	Female	14	2020122508:58:34	Abdominal pain
20122501855	Female	14	2020122516:59:56	Drug poisoning
18071001296	Male	14	2020122819:26:42	Chest pain
20123000054	Female	14	2020123005:11:29	Drug poisoning (Sherlin)
20123100021	Male	14	2020123101:39:20	Abdominal pain
18082601746	Male	15	2020010111:34:36	Bronchitis
18082601746	Male	15	2020010111:34:36	Viral infection
18082601746	Male	15	2020010111:34:36	Heat
17031802764	Female	15	2020010121:20:19	Bacterial infection
17031802764	Female	15	2020010121:20:19	Respiratory infections
17031802764	Female	15	2020010121:20:19	Heat
20010201996	Male	15	2020010215:40:24	Bacterial infection
20010201996	Male	15	2020010215:40:24	Intestinal bacterial group disorders
20010201996	Male	15	2020010215:40:24	Gastritis
20010201996	Male	15	2020010215:40:24	Allergic reactions
20010401181	Female	15	2020010411:16:26	Bacterial infection
20010401181	Female	15	2020010411:16:26	Respiratory infections
16123176245	Male	15	2020010413:40:15	Pulmonary infection
16123176245	Male	15	2020010413:40:15	Respiratory infections
16123176245	Male	15	2020010413:40:15	Mickory inflammation
16123176245	Male	15	2020010506:08:39	Pulmonary infection
16123176245	Male	15	2020010506:08:39	Respiratory infections
20010500787	Male	15	2020010510:37:33	Bronchitis
20010500787	Male	15	2020010510:37:33	Respiratory infections
19051601644	Male	15	2020010514:13:51	Respiratory infections
20010501707	Female	15	2020010519:10:00	Respiratory infections
16123176245	Male	15	2020010606:16:37	Respiratory infections
16123176245	Male	15	2020010606:16:37	Pulmonary infection
20010700030	Male	15	2020010703:53:03	Respiratory infections
20010700030	Male	15	2020010703:53:03	Infectious fever
16123176245	Male	15	2020010706:08:02	Pulmonary infection
16123176245	Male	15	2020010706:08:02	Respiratory infections
17031603413	Male	15	2020010706:38:28	Respiratory infections
19052902271	Male	15	2020010709:03:51	Gastritis
20010702285	Male	15	2020010719:16:36	Bleeding the upper digestive tract?
20010702285	Male	15	2020010719:16:36	Bacterial infection
20010702285	Male	15	2020010719:16:36	Bronchitis
20010702285	Male	15	2020010719:16:36	Cough
16123176245	Male	15	2020010806:01:43	Respiratory infections
16123176245	Male	15	2020010806:01:43	Pulmonary infection
20010800203	Female	15	2020010806:49:37	Respiratory infections
20010801322	Female	15	2020010811:38:44	Respiratory infections
20010801869	Male	15	2020010815:33:04	Acute abscess pachian inflammation
20010802191	Female	15	2020010818:22:15	Bronchitis
20010802191	Female	15	2020010818:22:15	Cough
16123176245	Male	15	2020010906:09:49	Pulmonary infection
20010901421	Female	15	2020010913:03:20	Eating disorders
20010901421	Female	15	2020010913:03:20	Abdominal pain
20011000028	Male	15	2020011003:46:10	Respiratory infections
20011000028	Male	15	2020011003:46:10	Heat
16123176245	Male	15	2020011006:00:53	Pulmonary infection
16123176245	Male	15	2020011006:00:53	Bacterial infection
20011000689	Female	15	2020011009:17:35	Health check
20011002147	Male	15	2020011020:01:46	Headache
16123176245	Male	15	2020011106:05:50	Pulmonary infection
18081901109	Female	15	2020011107:05:40	Health check
20011101165	Male	15	2020011111:46:14	Bacterial infection
20011101165	Male	15	2020011111:46:14	Gastritis
20011101165	Male	15	2020011111:46:14	Abdominal pain
20011200034	Male	15	2020011202:45:59	Respiratory infections
20010702285	Male	15	2020011407:44:08	Bronchitis
20010702285	Male	15	2020011407:44:08	Bacterial infection
20010702285	Male	15	2020011407:44:08	Bleeding the upper digestive tract?
20011401864	Female	15	2020011417:57:54	Ketosis
20011401864	Female	15	2020011417:57:54	Bacterial infection
20011401864	Female	15	2020011417:57:54	Disgusting
17121400146	Female	15	2020011518:34:56	Bacterial infection
17121400146	Female	15	2020011518:34:56	Gastritis
19121901162	Male	15	2020011607:39:45	Respiratory infections
17083101676	Female	15	2020011707:27:14	Abdominal pain
20011801347	Female	15	2020011817:10:32	Heat
20012200586	Male	15	2020012213:04:04	Pneumonia
20012200919	Female	15	2020012220:42:34	Respiratory infections
20012200919	Female	15	2020012220:42:34	Bacterial infection
20012200919	Female	15	2020012220:42:34	Gastritis
20012300021	Female	15	2020012303:39:42	Bronchitis
20012300021	Female	15	2020012303:39:42	Asthma
20012300113	Female	15	2020012308:01:55	Bacterial infection
20012300113	Female	15	2020012308:01:55	Heat
20012300177	Male	15	2020012308:56:01	Pulmonary infection
20012300177	Male	15	2020012308:56:01	Respiratory infections
20012400024	Female	15	2020012405:07:14	Abdominal pain
20012400114	Male	15	2020012408:33:06	Respiratory infections
20012400114	Male	15	2020012408:33:06	Bacterial infection
20012400114	Male	15	2020012508:31:37	Bacterial infection
20012400114	Male	15	2020012508:31:37	Respiratory infections
20012400114	Male	15	2020012609:10:15	Respiratory infections
20012400114	Male	15	2020012708:19:32	Respiratory infections
18073001579	Male	15	2020012708:31:52	Pulmonary infection
18073001579	Male	15	2020012708:31:52	Respiratory infections
18073001579	Male	15	2020012808:19:30	Pulmonary infection
18073001579	Male	15	2020012808:19:30	Respiratory infections
20012400114	Male	15	2020012808:37:21	Respiratory infections
20012400114	Male	15	2020012808:37:21	Bacterial infection
20012400114	Male	15	2020012808:37:21	Viral infection
18073001579	Male	15	2020012908:18:04	Pulmonary infection
20012900250	Female	15	2020012911:31:27	Upper respiratory tract infection
18073001579	Male	15	2020013008:46:53	Pulmonary infection
20020200318	Female	15	2020020217:02:01	Respiratory infections
20020200318	Female	15	2020020217:02:01	Gastritis
20020200318	Female	15	2020020217:02:01	Chest pain
20020900039	Female	15	2020020908:37:27	Respiratory infections
20020900039	Female	15	2020020908:37:27	Whole blood cell reduction
20020900039	Female	15	2020020909:53:02	Respiratory infections
20020900039	Female	15	2020020909:53:02	Whole blood cell reduction
20020900039	Female	15	2020021009:48:27	Whole blood cell reduction
20020900039	Female	15	2020021009:48:27	Respiratory infections
20022000759	Female	15	2020022018:15:08	Foreign matter in esophagus?
20022500882	Female	15	2020022519:06:36	Chest stuffy
20022500882	Female	15	2020022519:06:36	Be palpitations
19031300178	Female	15	2020030413:31:20	Dizziness
20030501192	Male	15	2020030708:48:00	Lymph node inflammation
20030700296	Male	15	2020030709:09:02	Digestive bleeding
20030400538	Female	15	2020031008:04:45	Heat
20031001424	Male	15	2020031023:09:53	Abdominal pain
20031501141	Male	15	2020031516:37:32	Chest stuffy
19082200088	Male	15	2020031913:30:12	Respiratory infections
20032201376	Female	15	2020032221:07:09	Foreign material in the digestive tract
20032200232	Female	15	2020032515:05:53	Respiratory infections
20030700296	Male	15	2020032711:38:43	Gastritis
20032500955	Female	15	2020033012:52:25	Lackluster
20040201867	Male	15	2020040219:43:51	Asthma takes medication
19031101267	Male	15	2020040501:43:36	Abdominal pain
20040600959	Male	15	2020040611:07:37	Asthma
20041101720	Male	15	2020041119:35:30	Pleural effusion
20041200854	Male	15	2020041211:48:00	Chest pain
20041400294	Male	15	2020041620:04:01	Pneumonia
20041400294	Male	15	2020041620:04:01	Pleural effusion
20041400294	Male	15	2020041620:04:01	Lung Shadow
20041400294	Male	15	2020041620:04:01	Bacterial infection?
20041400294	Male	15	2020041620:04:01	Respiratory infections?
20041602137	Female	15	2020041622:25:18	Hives, others
20041602137	Female	15	2020041622:25:18	Bleeding the upper digestive tract?
20041602137	Female	15	2020041622:25:18	Allergic shock
20041501200	Female	15	2020041712:03:08	Bacterial infection
20041501200	Female	15	2020041712:03:08	Anemia
20041501200	Female	15	2020041712:03:08	Digestive bleeding
20042100733	Male	15	2020042110:00:27	Acute gastritis?
20042100733	Male	15	2020042110:00:27	Vomiting
20042100733	Male	15	2020042110:00:27	Disgusting
20042201240	Female	15	2020042212:19:58	Gastritis
20042201240	Female	15	2020042212:19:58	Abdominal pain
20042201240	Female	15	2020042212:19:58	Bacterial infection
20042201240	Female	15	2020042212:19:58	Diarrhea
20042301207	Female	15	2020042408:09:03	Chest stuffy
20042600766	Female	15	2020042610:48:02	Bacterial infection
20042600766	Female	15	2020042610:48:02	Abdominal pain
20042600766	Female	15	2020042610:48:02	Heat
20042901253	Female	15	2020042911:10:08	Heat
20042901253	Female	15	2020042911:10:08	Bacterial infection
20042901253	Female	15	2020043007:12:01	Bacterial infection
20042901253	Female	15	2020043007:12:01	Heat
20050100034	Female	15	2020050105:52:20	Alcohol poisoning?
20050100308	Male	15	2020050108:05:04	Be palpitations
20050100308	Male	15	2020050108:05:04	Chest stuffy
19092701589	Female	15	2020050309:46:16	Foreign object in esophagus
20042901253	Female	15	2020050415:09:15	Bacterial infection
20050701648	Female	15	2020050807:46:32	Chronic mesenteric lymphadenitis
18060700693	Female	15	2020050808:55:17	Heat
20050900024	Male	15	2020050903:31:14	Hollow tuberculosis, sputum examination (+)
20050900024	Male	15	2020050903:31:14	Pulmonary infection
20050900024	Male	15	2020050903:31:14	Gastritis
20050900024	Male	15	2020050903:31:14	Haemoptysis
20050900024	Male	15	2020050903:31:14	Heat
20050900024	Male	15	2020051020:04:54	Bacterial infection
20050900024	Male	15	2020051020:04:54	Hollow lungs
20050900024	Male	15	2020051020:04:54	Gastritis
20050900024	Male	15	2020051020:04:54	Slimline bronchodilation
20050900024	Male	15	2020051020:04:54	Haemoptysis
20051101444	Female	15	2020051112:10:23	Abdominal pain
20051101444	Female	15	2020051112:10:23	Diarrhea
18060700693	Female	15	2020051115:05:22	Heat
20051301063	Female	15	2020051310:02:01	Diarrhea
18060700693	Female	15	2020051314:31:28	Anemia
18060700693	Female	15	2020051314:31:28	Heat
20051302094	Female	15	2020051320:07:30	Bacterial infection
20051302094	Female	15	2020051320:07:30	Heat
20051601767	Male	15	2020051616:55:11	Chest pain
20051701149	Male	15	2020051713:13:35	Limited Salmonella infection
20051701149	Male	15	2020051713:13:35	Liver damage
20051701149	Male	15	2020051713:13:35	Chest pain
20051701149	Male	15	2020051713:13:35	Arrhythmia
20051701149	Male	15	2020051713:13:35	Myocarditis
20041400294	Male	15	2020052013:52:29	Chest stuffy
20041400294	Male	15	2020052013:52:29	Bleeding
20041400294	Male	15	2020052013:52:29	Lymphoma
20052000966	Female	15	2020052210:42:11	Anemia
20052301513	Female	15	2020052314:14:28	Syncope
20052401284	Male	15	2020052414:56:24	Disgusting
20052000966	Female	15	2020052506:54:21	Anemia
18062700208	Female	15	2020052509:35:58	Anemia
20052501480	Male	15	2020052512:57:24	Dizziness
20052501480	Male	15	2020052512:57:24	Chest stuffy
18042500677	Female	15	2020052520:45:05	Chest stuffy
17112402903	Male	15	2020052910:49:38	Abdominal pain
20060101533	Male	15	2020060113:29:20	Back pain
20060201983	Male	15	2020060218:25:01	Gastritis
19122802202	Male	15	2020060306:55:22	Intestinal bacterial group disorders
19122802202	Male	15	2020060306:55:22	Gastritis
19122802202	Male	15	2020060306:55:22	Disgusting
19122802202	Male	15	2020060306:55:22	Dizziness
20060301257	Male	15	2020060311:20:02	Gastritis?
20060301257	Male	15	2020060311:20:02	Abdominal pain
20060401392	Male	15	2020060412:24:46	Abdominal pain
17120700217	Female	15	2020060806:43:06	Abdominal pain
17120700217	Female	15	2020060806:43:06	Intestinal bacterial group disorders
20060501620	Female	15	2020060814:18:00	Abdominal pain
20060802449	Male	15	2020060820:45:44	Chest stuffy
20060901915	Female	15	2020060916:35:12	Anemia
20060901915	Female	15	2020060916:35:12	Hypoproteinemia
20060901915	Female	15	2020060916:35:12	Electrolyte metabolism disorders
20060901915	Female	15	2020060916:35:12	Acute gastric mucosal disease
20060901915	Female	15	2020060916:35:12	Acute pancreatitis
20060901915	Female	15	2020060916:35:12	Systemic lupus erythematosus
20061000539	Male	15	2020061008:42:20	Muscle injury?
20061000713	Male	15	2020061009:15:18	Diarrhea
20061000713	Male	15	2020061009:15:18	Acute gastritis
20061100664	Male	15	2020061109:37:51	Mickory inflammation
18060700693	Female	15	2020061407:22:29	Heat
19121702796	Male	15	2020061519:43:49	Respiratory infections
20061600027	Female	15	2020061603:26:02	Acute respiratory bronchitis
20061600027	Female	15	2020061603:26:02	Chest stuffy
20061700016	Male	15	2020061701:13:38	Asthma
20061701500	Female	15	2020061712:57:45	Viral infection
20061701500	Female	15	2020061712:57:45	Heat
20061801176	Female	15	2020061812:44:08	Heat
20052000966	Female	15	2020061816:46:17	Thrombocytopenia
20061901102	Female	15	2020061912:43:34	Viral infection
20061901102	Female	15	2020061912:43:34	Infectious fever
20062001172	Female	15	2020062013:52:43	Heat
20062001172	Female	15	2020062013:52:43	Viral infection
20062001755	Female	15	2020062020:44:11	Abdominal pain
20062001755	Female	15	2020062020:44:11	Bacterial infection
20062001755	Female	15	2020062020:44:11	Gastritis
20062101002	Female	15	2020062113:54:30	Viral infection
20062000083	Female	15	2020062207:44:35	Vomiting
20062201474	Female	15	2020062214:21:46	Infectious mononucleosis, other?
20062201474	Female	15	2020062214:21:46	Viral infection
20062201576	Female	15	2020062214:52:59	Nausea and vomiting
20062201576	Female	15	2020062214:52:59	Be palpitations
20041400294	Male	15	2020062215:02:37	Lymphoma
20052000966	Female	15	2020062221:54:36	Thrombocytopenia
19090500445	Female	15	2020062308:33:04	Acute gastritis
19090500445	Female	15	2020062308:33:04	Nausea and vomiting
19090500445	Female	15	2020062308:33:04	Bacterial infection
20062301081	Female	15	2020062311:19:47	Viral infection
20062301497	Female	15	2020062314:23:37	Viral infection
20062301681	Female	15	2020062315:43:15	Allergic reactions
20062301681	Female	15	2020062315:43:15	Breathing
20062301681	Female	15	2020062315:43:15	Asthma
19112200590	Male	15	2020062413:27:57	Abdominal pain
20060400333	Female	15	2020062613:19:45	Abdominal pain
20062601826	Female	15	2020062619:55:18	Chest pain
20062601826	Female	15	2020062619:55:18	Pain
20070101655	Male	15	2020070114:18:47	Acute pancreatitis
20070101655	Male	15	2020070114:18:47	Abnormal renal function
20070101655	Male	15	2020070114:18:47	Hypoproteinemia
20070101655	Male	15	2020070114:18:47	Gastric mucosal lesions
20070101655	Male	15	2020070114:18:47	Nephrotic syndrome?
20070500776	Male	15	2020070510:32:40	Abdominal pain
20070501680	Female	15	2020070518:29:15	Thrombocytopenia
20070602873	Male	15	2020070622:56:18	Chest stuffy
20032301591	Male	15	2020071221:55:36	After radiotherapy of saddle lesions (reproductive cell tumors)
20032301591	Male	15	2020071221:55:36	Gastritis
20032301591	Male	15	2020071221:55:36	Vomiting
20032301591	Male	15	2020071221:55:36	Liver function is not complete
20032301591	Male	15	2020071221:55:36	Appetite is lacking
19081901641	Male	15	2020071307:43:20	Mickory inflammation
19081901641	Male	15	2020071307:43:20	Thyopharyngetis
20071201481	Male	15	2020071309:09:19	Chest stuffy
20071201481	Male	15	2020071309:09:19	Bacterial infection
20071201481	Male	15	2020071309:09:19	Heat
20071602502	Male	15	2020071620:18:41	Upper respiratory tract infection
20071602761	Male	15	2020071700:21:29	Mickory inflammation
20071602761	Male	15	2020071700:21:29	Heat
20071602761	Male	15	2020071720:35:08	Mickory inflammation
20071601158	Female	15	2020072010:02:38	Anemia heart disease
20071601158	Female	15	2020072010:02:38	Dizziness
18011200660	Female	15	2020072018:02:11	Foreign material in the digestive tract
20072002731	Male	15	2020072019:43:04	Bacterial infection
20072002731	Male	15	2020072019:43:04	Respiratory infections
20072002731	Male	15	2020072019:43:04	Heat
20072003097	Male	15	2020072023:45:39	Alcohol poisoning
20072003097	Male	15	2020072023:45:39	Gastritis
20072102603	Female	15	2020072313:30:43	Enlarged cervical lymph nodes
17010101510	Female	15	2020072313:33:43	Postural hypotension
17010232805	Male	15	2020072315:09:15	Bacterial infection
17010232805	Male	15	2020072315:09:15	Respiratory infections
17010232805	Male	15	2020072315:09:15	Heat
17010232805	Male	15	2020072414:38:03	Bacterial infection
17010232805	Male	15	2020072414:38:03	Respiratory infections
17010232805	Male	15	2020072414:38:03	Heat
20072800623	Male	15	2020072809:21:02	Medical examination
20072802422	Male	15	2020072820:57:05	Respiratory infections
20072900262	Female	15	2020072907:11:42	Medical examination
20072902702	Female	15	2020072923:26:28	Syncope
20080101122	Female	15	2020080110:43:20	Lackluster
20080101122	Female	15	2020080110:43:20	Connective tissue disease
20080200878	Female	15	2020080211:18:42	Syncope
20080200878	Female	15	2020080211:18:42	Twitching
20071601158	Female	15	2020080309:13:04	Causes of anemia are to be checked
20071601158	Female	15	2020080309:13:04	Dizziness
19121200021	Male	15	2020080314:04:41	Respiratory infections
20080502307	Male	15	2020080608:44:52	Medical examination
20080602437	Female	15	2020080620:30:28	Abdominal pain
20080602437	Female	15	2020080620:30:28	Stomach pain
20080900638	Female	15	2020081114:09:42	Heat
19022002555	Male	15	2020081313:37:26	Medical examination
20081402180	Male	15	2020081418:25:55	Acute gastritis?
20081402180	Male	15	2020081418:25:55	Bacterial infection
20081402180	Male	15	2020081418:25:55	Vomiting
20081502139	Female	15	2020081609:55:33	Abdominal pain
18110101741	Female	15	2020081616:24:35	Chest stuffy
20081702686	Male	15	2020081720:30:11	Gastritis
20082000769	Female	15	2020082009:35:08	Bacterial infection
20082000769	Female	15	2020082009:35:08	Acute gastritis
20082000769	Female	15	2020082009:35:08	Abdominal pain
18070500707	Male	15	2020082019:05:18	Abdominal pain
18070500707	Male	15	2020082019:05:18	Gastritis
20081700468	Male	15	2020082108:23:22	Lymph node enlargement
20082300043	Male	15	2020082304:29:10	Gastritis
20082300043	Male	15	2020082304:29:10	Vomiting
20082300043	Male	15	2020082304:29:10	Abdominal pain
20082402730	Female	15	2020082421:50:57	Hypokalemia
20082402730	Female	15	2020082421:50:57	Be palpitations
20082501055	Female	15	2020082510:22:48	Medical examination
20072701911	Female	15	2020082513:39:56	Medical examination
20071601158	Female	15	2020082514:30:46	Causes of anemia are to be checked
20071601158	Female	15	2020082514:30:46	Anemia heart disease
20071601158	Female	15	2020082514:30:46	Dizziness
20082401470	Male	15	2020082608:06:37	Headache
20081700468	Male	15	2020082608:15:57	EB virus infection
20082601784	Male	15	2020082614:44:44	Abdominal pain
20082700460	Male	15	2020082708:25:04	Medical examination
20071601158	Female	15	2020082714:00:23	Causes of anemia are to be checked
20071601158	Female	15	2020082715:05:34	Causes of anemia are to be checked
20082900646	Male	15	2020083007:34:48	Lackluster
20080900638	Female	15	2020090114:02:54	The cause of heat is pending
20080900638	Female	15	2020090114:02:54	Bacterial infection
20080900638	Female	15	2020090114:02:54	Constipation
20090102514	Male	15	2020090119:29:24	Abdominal pain
18101100143	Female	15	2020090207:58:16	Increased platelet
18101100143	Female	15	2020090207:58:16	Low-pigment anemia in small cells
20090102733	Female	15	2020090210:17:02	Medical examination
20090300048	Female	15	2020090306:23:55	Hypokalemia
20090302610	Male	15	2020090320:36:22	Diarrhea
20090302610	Male	15	2020090320:36:22	Vomiting
20090302886	Male	15	2020090400:14:59	Hives
20090302886	Male	15	2020090400:14:59	Respiratory infections
20090402977	Female	15	2020090422:50:00	Disgusting
20090502578	Male	15	2020090607:35:52	Inflammation of the mucous membrane
20090502578	Male	15	2020090607:35:52	Chest pain
20090502578	Male	15	2020090607:35:52	Chest stuffy
18052601720	Female	15	2020090710:15:06	Abdominal pain
20091002910	Female	15	2020091022:26:28	Appetite is lacking
20091002910	Female	15	2020091022:26:28	Be palpitations
20091101519	Male	15	2020091113:57:51	Headache
19061802292	Female	15	2020091122:04:44	Edema
20091200032	Male	15	2020091202:52:09	Bacterial infection
20091200032	Male	15	2020091202:52:09	Manic attack
20091201223	Female	15	2020091211:37:37	Chest stuffy
20091201839	Male	15	2020091215:17:57	Ketosis
20091201839	Male	15	2020091215:17:57	Diabetes?
20091300973	Female	15	2020091311:11:45	Headache
20091302268	Female	15	2020091322:27:35	Gastritis
20091302268	Female	15	2020091322:27:35	Paraquat poisoning
19101200228	Female	15	2020091410:18:15	Heat
20091502541	Male	15	2020091523:19:32	Be palpitations
20091502541	Male	15	2020091523:19:32	Bacterial infection
20080101155	Female	15	2020091716:21:32	Chest stuffy
20091801410	Male	15	2020091812:47:41	Chest pain
20091802545	Male	15	2020091821:13:38	Be palpitations
20091802545	Male	15	2020091821:13:38	Respiratory infections
161230058346	Male	15	2020091909:20:25	Medical examination
17031201872	Male	15	2020091916:29:58	Medical examination
18052201750	Male	15	2020092020:50:47	Asthma takes medication
161230058346	Male	15	2020092109:32:30	Respiratory infections
20092102234	Female	15	2020092116:33:19	Bacterial infection
20092102234	Female	15	2020092116:33:19	Abdominal pain
20092202435	Female	15	2020092220:22:50	Gastritis
20092202435	Female	15	2020092220:22:50	Abdominal pain
17010262769	Female	15	2020092306:49:19	Be palpitations
161230044599	Male	15	2020092415:13:37	Respiratory infections
19101200228	Female	15	2020092506:32:40	Heat to be checked
20092500325	Male	15	2020092508:30:34	Abdominal pain
17010262769	Female	15	2020092514:15:36	Bacterial infection
17010262769	Female	15	2020092514:15:36	Diabetes
17010262769	Female	15	2020092514:15:36	Gastritis
17010262769	Female	15	2020092514:15:36	Abdominal pain
20092202258	Male	15	2020092514:45:01	Acute abscess pachian inflammation
20092701932	Male	15	2020092720:53:23	Gout
17120700955	Female	15	2020092807:48:44	Bacterial infection
17120700955	Female	15	2020092807:48:44	Gastritis
17120700955	Female	15	2020092807:48:44	Abdominal pain
17120700955	Female	15	2020092807:48:44	Vomiting
20093000030	Male	15	2020093004:49:33	Chest pain
17011801759	Male	15	2020100314:18:02	Hypertension
20100301535	Male	15	2020100319:21:45	Metal poisoning
20080502307	Male	15	2020100408:13:51	Medical examination
20100400992	Male	15	2020100411:38:25	Acute gastric mucosal disease
19101200228	Female	15	2020100608:10:49	Heat to be checked
17120700217	Female	15	2020100611:33:49	Indigestion
17120700217	Female	15	2020100611:33:49	Intestinal bacterial group disorders
17120700217	Female	15	2020100611:33:49	Medical examination
20100602187	Female	15	2020100620:04:29	Abdominal pain
20100800041	Female	15	2020100802:52:29	Chest stuffy
20100800041	Female	15	2020100802:52:29	No exceptions were seen
20100900925	Male	15	2020100910:08:57	Disgusting
20100903119	Female	15	2020101007:14:20	Abdominal pain
20101001726	Female	15	2020101013:59:40	Bacterial infection
20101001726	Female	15	2020101013:59:40	Intestinal bacterial group disorders
20101001726	Female	15	2020101013:59:40	Diarrhea
20101100740	Male	15	2020101111:57:53	Dizziness
20010500320	Female	15	2020101507:51:26	Respiratory infections
20101602228	Male	15	2020101618:30:38	Hypertension
19030201898	Female	15	2020101709:32:57	Gastritis
19030201898	Female	15	2020101709:32:57	Abdominal pain
17021802595	Female	15	2020101713:32:14	Chest pain
20101702445	Male	15	2020101723:27:22	Acute gastric mucosal disease
20101702445	Male	15	2020101723:27:22	Drug poisoning
20101901952	Female	15	2020101914:37:45	Abdominal pain
20102000899	Female	15	2020102010:12:46	Abdominal pain
20102000899	Female	15	2020102010:12:46	Gastritis
20102000899	Female	15	2020102010:12:46	Indigestion
19101200228	Female	15	2020102013:47:44	Heat to be checked
19101200228	Female	15	2020102014:39:18	Heat to be checked
20102002340	Male	15	2020102018:41:51	Chest pain
20101900496	Female	15	2020102109:31:46	Lackluster
17090102553	Female	15	2020102114:17:37	Gastritis
17090102553	Female	15	2020102114:17:37	Abdominal pain
17010267190	Male	15	2020102120:21:16	Chest stuffy
17010267190	Male	15	2020102120:21:16	Bradycardia
20101900496	Female	15	2020102211:20:00	Lackluster
20102501735	Male	15	2020102521:20:44	Nasal injury
20102600020	Male	15	2020102601:57:24	Gastritis
20102600020	Male	15	2020102601:57:24	Abdominal pain
20102600020	Male	15	2020102601:57:24	Vomiting
20102601317	Female	15	2020102611:06:36	Diabetes
20102601317	Female	15	2020102611:06:36	Ketosis
20102601750	Female	15	2020102613:19:49	Chest stuffy
18020900721	Male	15	2020102708:04:52	Be palpitations
20102700769	Female	15	2020102709:38:46	Lackluster
20102701394	Female	15	2020102712:37:35	Chest stuffy
20102701486	Male	15	2020102713:11:08	Chest pain
20102701905	Male	15	2020102716:29:33	Coagulation dysfunction
20102702534	Male	15	2020102721:37:50	Abdominal pain
20102800247	Male	15	2020102808:01:41	Bacterial infection
20102800247	Male	15	2020102808:01:41	Headache
20102800247	Male	15	2020102808:01:41	Meningitis?
20102800247	Male	15	2020102808:01:41	Heat
20102800247	Male	15	2020102808:30:05	Meningitis?
20102800247	Male	15	2020102808:30:05	Heat
20102800247	Male	15	2020102808:30:05	Bacterial infection
20062001755	Female	15	2020102815:55:48	Abdominal pain
20102802593	Female	15	2020102820:45:48	Abdominal pain
20102900041	Male	15	2020102905:27:09	Gastritis
20102900041	Male	15	2020102905:27:09	Abdominal pain
20110301914	Female	15	2020110315:37:23	Lackluster
20110401712	Male	15	2020110414:08:47	Abdominal pain
20080101155	Female	15	2020110515:47:01	Vomiting
20080101155	Female	15	2020110515:47:01	Dizziness
20080101155	Female	15	2020110515:47:01	Chest stuffy
20110501947	Male	15	2020110519:31:33	Chest pain
20110700309	Male	15	2020110707:47:16	Medical examination
19082400421	Male	15	2020110721:13:23	Abdominal pain
18020600358	Male	15	2020110910:22:01	Abdominal pain
20110901798	Female	15	2020110914:17:23	Abdominal pain
20110702177	Male	15	2020111014:21:15	Dizziness
20110702177	Male	15	2020111014:21:15	The cause of heat is pending
20111002852	Male	15	2020111022:25:04	Abdominal pain
20111102437	Male	15	2020111118:56:29	Lackluster
20092001653	Male	15	2020111120:08:37	Foreign matter in the digestive tract?
20111102675	Male	15	2020111120:41:41	Abdominal pain
20111200129	Female	15	2020111207:02:16	Heat
20111200565	Male	15	2020111209:05:09	Respiratory infections
18052601720	Female	15	2020111209:10:56	Acute gastritis
18052601720	Female	15	2020111209:10:56	Abdominal pain
18052601720	Female	15	2020111209:10:56	Disgusting
18052601720	Female	15	2020111209:10:56	Headache
18052601720	Female	15	2020111209:10:56	Anemia
20111200644	Female	15	2020111209:21:25	Gastritis
20111200644	Female	15	2020111209:21:25	Vomiting
18052601720	Female	15	2020111215:51:18	Disgusting
20111401214	Male	15	2020111411:39:30	Medical examination
20111401536	Male	15	2020111413:46:00	Chest pain
161230093350	Male	15	2020111601:55:42	Chest stuffy
20111700746	Male	15	2020111709:58:06	Gastritis
20111700746	Male	15	2020111709:58:06	Abdominal pain
20111702123	Male	15	2020111717:54:43	Bacterial infection
20111702123	Male	15	2020111717:54:43	Dizziness
20111801203	Female	15	2020111812:34:09	Be palpitations
18050702021	Female	15	2020111813:34:38	Gastritis
18050702021	Female	15	2020111813:34:38	Indigestion
18050702021	Female	15	2020111813:34:38	Intestinal bacterial group disorders
18050702021	Female	15	2020111813:34:38	Abdominal pain
20111801569	Female	15	2020111814:54:19	Be palpitations
20111801868	Female	15	2020111817:19:12	Stomach retention
20111801868	Female	15	2020111817:19:12	Acute pancreatitis
20111801868	Female	15	2020111817:19:12	Abdominal pain
19050202195	Male	15	2020111820:33:27	Abdominal pain
20092301977	Male	15	2020111900:48:46	Abdominal pain
161230093350	Male	15	2020111906:44:18	Bronchial asthma?
161230093350	Male	15	2020111906:44:18	Chest stuffy
161230093350	Male	15	2020111906:44:18	Respiratory infections
19111400571	Male	15	2020111914:34:40	Chest pain
20103101871	Male	15	2020112000:29:43	Bacterial infection
20103101871	Male	15	2020112000:29:43	Acute gastritis
20103101871	Male	15	2020112000:29:43	Nausea and vomiting
18042100477	Female	15	2020112108:27:10	Joint pain
20112200373	Male	15	2020112209:28:29	Acute gastritis
20112200373	Male	15	2020112209:28:29	Abdominal pain
17032300785	Male	15	2020112215:40:45	Abdominal pain
20112201344	Female	15	2020112215:46:35	Disgusting
20112201344	Female	15	2020112215:46:35	Dizziness
20112201577	Female	15	2020112218:44:54	Vomiting
20112201577	Female	15	2020112218:44:54	Gastritis
20112301164	Male	15	2020112311:19:49	Chest pain
20112401293	Female	15	2020112412:50:39	The number of months passed
20112401293	Female	15	2020112412:50:39	Syncope
20112401293	Female	15	2020112412:50:39	Causes of anemia are to be checked
18050702021	Female	15	2020112502:06:29	Abdominal pain
20112600852	Female	15	2020112610:13:31	Be palpitations
20112701331	Female	15	2020112714:11:42	Be palpitations
20052902212	Male	15	2020112818:27:36	Foreign matter in the digestive tract?
20052902212	Male	15	2020112818:27:36	Abdominal pain
20052902212	Male	15	2020112911:46:11	Abdominal pain
20052902212	Male	15	2020112911:46:11	Gastric mucosal lesions
20113002228	Female	15	2020113018:38:06	Abdominal pain
20120101608	Female	15	2020120114:30:08	Abdominal pain
20120201603	Female	15	2020120214:14:43	Abdominal pain
20120202373	Male	15	2020120308:03:26	Lackluster
20120301570	Female	15	2020120314:51:50	Abdominal pain
20120301570	Female	15	2020120314:51:50	Gastritis
20120302110	Male	15	2020120319:05:29	Bacterial infection
20120302110	Male	15	2020120319:05:29	Respiratory infections
20120302110	Male	15	2020120319:05:29	Chest stuffy
20091402675	Male	15	2020120323:49:13	Gastritis
20091402675	Male	15	2020120323:49:13	Abdominal pain
20120401629	Male	15	2020120415:40:06	Pancreatic damage
20120401629	Male	15	2020120415:40:06	Medical examination
20120401629	Male	15	2020120415:40:06	Sepsis
20120401629	Male	15	2020120415:40:06	Intestinal infection
20120401629	Male	15	2020120415:40:06	Phemocytic syndrome?
20120401629	Male	15	2020120415:40:06	Abnormal liver function
20090402327	Male	15	2020120507:57:42	Thin
20020700141	Male	15	2020120512:54:05	Chullin drug poisoning
20020700141	Male	15	2020120512:54:05	Gastritis
18060700693	Female	15	2020120514:06:00	Be palpitations
19081502322	Male	15	2020120613:42:01	Abdominal pain
18071603092	Female	15	2020120707:40:47	Abdominal pain
18020900721	Male	15	2020120709:40:25	Lackluster
17110700753	Male	15	2020120710:14:20	Abdominal pain
20120800024	Male	15	2020120803:51:39	Unconscious
20120800024	Male	15	2020120803:51:39	Alcohol poisoning?
20120800024	Male	15	2020120803:52:06	Unconscious
20120801553	Female	15	2020120813:55:23	Nausea and vomiting
161231104666	Female	15	2020120817:00:09	Abdominal pain
20100901887	Female	15	2020120906:56:36	Respiratory infections
20120900196	Male	15	2020120907:19:06	Chest stuffy
20120902542	Female	15	2020120920:43:47	Abdominal pain
20120902542	Female	15	2020120920:43:47	Bacterial infection
20120902542	Female	15	2020120920:43:47	Gastritis
20121102181	Female	15	2020121119:54:43	Gastritis
20121102181	Female	15	2020121119:54:43	Intestinal bacterial group disorders
18052601720	Female	15	2020121210:04:42	Urinary tract infection
20121300199	Male	15	2020121308:05:48	Chest pain
20121301133	Female	15	2020121314:17:24	Acute gastritis
20121301133	Female	15	2020121314:17:24	Abdominal pain
20121301890	Male	15	2020121322:00:52	Gastritis
20121301890	Male	15	2020121322:00:52	Vomiting
20051402438	Female	15	2020121614:33:18	Acute pancreatitis
20110200045	Female	15	2020121708:00:28	Joint pain
20121801117	Female	15	2020121811:44:00	Abdominal pain
20121801117	Female	15	2020121811:44:00	Bacterial infection
17010259964	Female	15	2020121915:29:59	Mickory inflammation
20121902186	Male	15	2020121923:16:08	Urinal pain
20051402438	Female	15	2020122008:17:30	Acute pancreatitis
20122100025	Male	15	2020122103:30:22	Bacterial infection
20122100025	Male	15	2020122103:30:22	Vomiting
20122100025	Male	15	2020122103:30:22	Gastritis
20122200019	Female	15	2020122202:32:10	Chest stuffy
20122200019	Female	15	2020122202:32:10	Disgusting
20122300418	Female	15	2020122308:35:36	Abdominal pain
20122300418	Female	15	2020122308:35:36	Peptic ulcer?
17010102283	Male	15	2020122322:43:04	Bacterial infection
17010102283	Male	15	2020122322:43:04	Ketosis
17010102283	Male	15	2020122322:43:04	Vomiting
17010102283	Male	15	2020122322:43:04	Headache
17010102283	Male	15	2020122322:43:04	Abdominal pain
20110200045	Female	15	2020122408:00:49	Joint pain
18073001289	Female	15	2020122408:57:02	Acute gastritis
18073001289	Female	15	2020122408:57:02	Nausea and vomiting
20122400750	Male	15	2020122409:56:26	Abdominal pain
18060101745	Male	15	2020122410:51:46	Abdominal pain
20122402100	Female	15	2020122418:13:41	Bacterial infection
20122402100	Female	15	2020122418:13:41	Diarrhea
20122402100	Female	15	2020122418:13:41	Vomiting
161230058346	Male	15	2020122506:41:32	Dizziness
20051402438	Female	15	2020122708:08:37	Acute pancreatitis
20122700320	Male	15	2020122708:53:07	Abdominal pain
20122701330	Male	15	2020122715:21:24	Electrolyte metabolism disorders
20122701330	Male	15	2020122715:21:24	Chest stuffy
20122800028	Female	15	2020122802:42:41	Abdominal pain
19081202289	Male	15	2020122820:03:58	Chest pain
19081202289	Male	15	2020122820:03:58	Chest stuffy
19121202013	Male	15	2020122912:11:13	Abdominal pain
20123101790	Female	15	2020123120:44:23	Epilepsy?
18010800004	Male	16	2020010108:59:11	Respiratory infections
20010100773	Female	16	2020010111:04:34	Respiratory infections
20010100773	Female	16	2020010111:04:34	Viral infection
20010100773	Female	16	2020010111:04:34	White cell reduction
20010302680	Male	16	2020010323:38:19	Blood?
20010400032	Male	16	2020010402:02:31	Allergic dermatitis
20010400032	Male	16	2020010402:02:31	Heat to be checked
20010501662	Female	16	2020010518:41:25	Be palpitations
20010501788	Female	16	2020010520:10:44	Respiratory infections
20010501788	Female	16	2020010520:10:44	Liver damage
20010501788	Female	16	2020010520:10:44	Heat
20010501788	Female	16	2020010520:10:44	Bacterial infection
20010501788	Female	16	2020010520:10:44	Pneumonia
20010501893	Female	16	2020010521:50:11	Be palpitations
18120200720	Male	16	2020010614:57:05	Heat
19050500355	Female	16	2020010616:03:22	Heat
20010601943	Male	16	2020010617:23:24	Hypertension
20010602138	Male	16	2020010618:20:07	Be palpitations
20010700019	Male	16	2020010701:51:45	Hypokalemia
20010700019	Male	16	2020010701:51:45	Chest stuffy
18120801882	Male	16	2020010708:29:50	Chest pain
18120200720	Male	16	2020010708:31:18	Respiratory infections
20010900368	Female	16	2020010908:12:10	Gastritis
20010900368	Female	16	2020010908:12:10	Abdominal pain
20010501788	Female	16	2020010909:27:14	Pneumonia
19020901427	Male	16	2020011113:35:36	Heat
19020901427	Male	16	2020011113:35:36	Respiratory infections
19020901427	Male	16	2020011113:35:36	Bacterial infection
19062201605	Female	16	2020011214:08:08	Respiratory infections
19062201605	Female	16	2020011214:08:08	Cough
20011201415	Female	16	2020011218:07:19	Respiratory infections
20011201415	Female	16	2020011218:07:19	Heat
20011300016	Female	16	2020011300:52:09	Bronchitis
20011300016	Female	16	2020011300:52:09	Cough
20011201415	Female	16	2020011310:51:58	Heat
20011201415	Female	16	2020011310:51:58	Respiratory infections
161230115766	Female	16	2020011314:07:33	Abdominal pain
161230115766	Female	16	2020011314:07:33	Gastritis
20011201385	Male	16	2020011314:31:38	Chronic gastritis
20011400212	Male	16	2020011407:19:29	Bacterial infection
20011400212	Male	16	2020011407:19:29	Respiratory infections
17020101427	Male	16	2020011515:13:30	Anemia
20010501788	Female	16	2020011605:37:50	Otitis media
20010501788	Female	16	2020011605:37:50	Heat
20010501788	Female	16	2020011605:37:50	Pneumonia
20010501788	Female	16	2020011605:37:50	Bacterial infection
20010501788	Female	16	2020011605:37:50	Hearing loss
20010501788	Female	16	2020011605:37:50	Respiratory infections
20010501788	Female	16	2020011605:37:50	Liver damage
20011600977	Male	16	2020011611:16:47	Chest pain
17020101427	Male	16	2020011612:56:37	Anemia
17051801528	Female	16	2020011620:01:37	Heat
17051801528	Female	16	2020011620:01:37	Bacterial infection
17051801528	Female	16	2020011620:01:37	Respiratory infections
20011500700	Male	16	2020011708:45:46	Heat
19080300813	Male	16	2020011808:01:31	Liver function is not complete
18102501699	Female	16	2020011812:48:51	Influenza
18102501699	Female	16	2020011812:48:51	Respiratory infections
20011801155	Male	16	2020011814:55:15	Respiratory infections
20011801155	Male	16	2020011814:55:15	Cough
20011801637	Male	16	2020011900:11:54	Respiratory infections
20011801155	Male	16	2020011910:03:54	Bacterial infection
20011801155	Male	16	2020011910:03:54	Respiratory infections
20011900958	Female	16	2020011915:11:09	Respiratory infections
20012001152	Female	16	2020012013:33:45	Diarrhea
20012001152	Female	16	2020012013:33:45	Nausea and vomiting
17052502663	Female	16	2020012017:31:43	Respiratory infections
19031803339	Female	16	2020012022:37:25	Pneumonia
19031803339	Female	16	2020012022:37:25	Heat
19031803339	Female	16	2020012022:37:25	Cough
20011801155	Male	16	2020012114:51:07	Respiratory infections
20011801155	Male	16	2020012114:51:07	Bacterial infection
20011801155	Male	16	2020012413:34:58	Bacterial infection
20011801155	Male	16	2020012413:34:58	Respiratory infections
20020100002	Female	16	2020020100:21:41	Abdominal pain
20020100149	Female	16	2020020110:21:02	Abdominal pain
20020100149	Female	16	2020020110:21:02	Gastritis
20020400329	Female	16	2020020414:45:08	Bacterial infection
20020400329	Female	16	2020020414:45:08	Diabetic ketoacidosis
20020400329	Female	16	2020020414:45:08	Acute pancreatitis
20020600373	Female	16	2020020619:44:26	Bacterial infection
20020600373	Female	16	2020020619:44:26	Acute gastric mucosal disease
20020600373	Female	16	2020020619:44:26	Liver damage
20020600373	Female	16	2020020619:44:26	Sepsis
20020600373	Female	16	2020020619:44:26	Anemia of regeneration disorder
20020600373	Female	16	2020020619:44:26	Coronary virus infection
20020600373	Female	16	2020020619:44:26	Whole blood cell reduction
20020600373	Female	16	2020020619:44:26	Hypoproteinemia
20020600373	Female	16	2020020619:44:26	Electrolyte metabolism disorders
20020600373	Female	16	2020020619:44:26	Heat
20021000162	Female	16	2020021010:25:54	Anemia of regeneration disorder
20022000004	Female	16	2020022001:15:42	Abdominal pain
17020101427	Male	16	2020022111:03:54	Anemia of regeneration disorder
17020101427	Male	16	2020022111:03:54	Anemia
20030600145	Female	16	2020030607:56:06	Abdominal pain
19090200164	Female	16	2020030710:21:18	Electrolyte metabolism disorders
19090200164	Female	16	2020030710:21:18	Systemic lupus erythematosus
17020101427	Male	16	2020031014:40:05	Anemia
18112200065	Male	16	2020031500:28:22	Pneumothorax
17020101427	Male	16	2020031512:32:07	Anemia
19042202660	Female	16	2020031710:38:28	Anemia
20031701760	Female	16	2020031719:58:04	Rash
19042202660	Female	16	2020031809:08:21	Anemia
20031801451	Male	16	2020031816:57:04	Be palpitations
20032001681	Male	16	2020032021:45:18	Chest stuffy
19011300953	Male	16	2020032314:23:48	Cough variability asthma?
17020101427	Male	16	2020032512:48:30	Anemia
20040401345	Male	16	2020040420:13:24	Liver damage
20040401345	Male	16	2020040420:13:24	Heat
20030700382	Male	16	2020040517:52:30	Be palpitations
20040601832	Female	16	2020040618:52:22	Bloating
20040601832	Female	16	2020040618:52:22	Disgusting
17020101427	Male	16	2020041014:33:50	Anemia
20041101537	Female	16	2020041116:44:15	Drug poisoning
17020101427	Male	16	2020041212:04:23	Anemia
20041401916	Male	16	2020041419:28:58	Asthma
20041500023	Male	16	2020041504:13:29	Ketosis
20041500023	Male	16	2020041504:13:29	Acute gastritis
20041500023	Male	16	2020041504:13:29	Bacterial infection
20041500023	Male	16	2020041504:13:29	Vomiting
20041702209	Female	16	2020041720:27:53	Chest stuffy
20041900628	Female	16	2020041910:06:07	Abdominal pain
20042201265	Male	16	2020042212:36:35	Abdominal pain
18092001457	Female	16	2020042212:37:15	Gastritis
18092001457	Female	16	2020042212:37:15	Be palpitations
18092001457	Female	16	2020042212:37:15	Myocarditis?
18092001457	Female	16	2020042212:37:15	Chest stuffy
18092001457	Female	16	2020042412:20:56	Gastritis
18092001457	Female	16	2020042412:20:56	Chest stuffy
18092001457	Female	16	2020042412:20:56	Myocarditis?
17020101427	Male	16	2020042414:26:24	Anemia
19121202698	Female	16	2020042421:39:14	Gastritis
19121202698	Female	16	2020042421:39:14	Abdominal pain
19121202698	Female	16	2020042421:39:14	Stomach retention
18092001457	Female	16	2020042611:31:01	Chest stuffy
18092001457	Female	16	2020042611:31:01	Myocarditis?
18092001457	Female	16	2020042611:31:01	Gastritis
17020101427	Male	16	2020042612:03:27	Anemia
20042601543	Male	16	2020042619:06:37	Chest pain
20042900792	Female	16	2020042909:23:33	Abdominal pain
18092001457	Female	16	2020042917:37:16	Gastritis
18092001457	Female	16	2020042917:37:16	The transverse muscle is dissolved
18092001457	Female	16	2020042917:37:16	Myocarditis?
19082200287	Male	16	2020043023:29:57	Gastritis
19082200287	Male	16	2020043023:29:57	Vomiting
19082200287	Male	16	2020043023:29:57	Ketosis
18111900485	Female	16	2020050120:41:47	Abdominal pain
20050200012	Female	16	2020050201:07:23	Asthma
161230075889	Male	16	2020050208:42:38	Liver function is not complete
18082802899	Female	16	2020050222:33:25	Vomiting
18082802899	Female	16	2020050222:33:25	Syncope
19082200287	Male	16	2020050311:01:10	Ketosis
19082200287	Male	16	2020050311:01:10	Gastritis
18030702166	Male	16	2020050711:13:09	Abdominal pain examination
20050702549	Female	16	2020050720:32:41	Viral infection
20050702549	Female	16	2020050720:32:41	Connective tissue disease
20050702549	Female	16	2020050720:32:41	Urinary tract infection
20050702549	Female	16	2020050720:32:41	Viral rash?
20050702549	Female	16	2020050720:32:41	Heat
20050702549	Female	16	2020050720:32:41	White cell reduction
20050702549	Female	16	2020050720:56:46	Heat
20050702549	Female	16	2020050720:56:46	Gastritis
20050702549	Female	16	2020050720:56:46	Viral rash?
18030702166	Male	16	2020050723:10:28	Abdominal pain examination
20050702549	Female	16	2020050809:17:23	Viral infection
20050702549	Female	16	2020050809:17:23	Gastritis
20050702549	Female	16	2020050809:17:23	Systemic lupus erythematosus
20050702549	Female	16	2020050809:17:23	Urinary tract infection
20050702549	Female	16	2020050809:17:23	Infectious fever
20050702549	Female	16	2020050809:17:23	White cell reduction
18030702166	Male	16	2020050809:40:56	Abdominal pain
20050702549	Female	16	2020050908:13:12	Abdominal pain
20050702549	Female	16	2020050908:13:12	Infectious fever
20050702549	Female	16	2020050908:13:12	Gastritis
20051001433	Male	16	2020051016:22:12	Blurred vision
20051001930	Female	16	2020051021:20:58	Diarrhea
20051001930	Female	16	2020051021:20:58	Chest pain
18030702166	Male	16	2020051111:04:48	Abdominal pain
19082200287	Male	16	2020051113:19:37	Ketosis
19082200287	Male	16	2020051113:19:37	Vomiting
19082200287	Male	16	2020051113:19:37	Gastritis
18092001457	Female	16	2020051116:45:26	Hypotension
18092001457	Female	16	2020051116:45:26	Gastritis
18092001457	Female	16	2020051116:45:26	Abnormal myocardium
18092001457	Female	16	2020051416:29:16	Chest stuffy
18092001457	Female	16	2020051416:29:16	Abnormal myocardium
18041501207	Female	16	2020051508:36:01	Tremor
19042202660	Female	16	2020051509:22:26	Anemia
18030702166	Male	16	2020051511:26:27	Abdominal pain
17020101427	Male	16	2020051613:37:39	Anemia of regeneration disorder
17020101427	Male	16	2020051613:37:39	Anemia
20051700064	Female	16	2020051706:36:04	Viral infection
20051700064	Female	16	2020051706:36:04	Heat
17020101427	Male	16	2020051811:59:38	Anemia
19042202660	Female	16	2020051812:43:29	Anemia
20051701484	Female	16	2020051813:16:22	Ketosis
20051701484	Female	16	2020051813:16:22	Diabetes
20051701484	Female	16	2020051814:13:28	Ketosis
20051701484	Female	16	2020051814:13:28	Diabetes
18092001457	Female	16	2020051816:45:34	Chest stuffy
18092001457	Female	16	2020051816:45:34	Abnormal myocardium
18071701075	Male	16	2020051909:11:27	Obesity
20051200575	Male	16	2020051909:23:39	Acute myeloid leukemia
20051701484	Female	16	2020051909:41:46	Diabetic ketoacidosis
16123187768	Female	16	2020052006:37:08	Bacterial infection
16123187768	Female	16	2020052006:37:08	Cervical lymphadenitis
18071701075	Male	16	2020052112:44:40	Obesity
17091300709	Male	16	2020052116:42:10	Be palpitations
20032701092	Female	16	2020052219:55:20	Chest stuffy
18092001457	Female	16	2020052309:25:30	Myocarditis?
18092001457	Female	16	2020052309:25:30	Gastritis
18092001457	Female	16	2020052309:25:30	Abnormal myocardium
20052302024	Male	16	2020052319:32:54	Chest stuffy
20052500420	Male	16	2020052508:16:18	Be palpitations
18112201912	Female	16	2020052512:38:10	Abdominal pain
18092001457	Female	16	2020052518:25:25	Myocarditis?
18092001457	Female	16	2020052518:25:25	Gastritis
18092001457	Female	16	2020052518:25:25	Abnormal myocardium
20052600046	Male	16	2020052606:14:05	Constipation
20052600046	Male	16	2020052606:14:05	Vomiting
20052600916	Female	16	2020052610:42:03	Be palpitations
20042601543	Male	16	2020052618:14:02	Lumbar pain
17030301406	Female	16	2020052707:10:17	Chest stuffy
17020101427	Male	16	2020052714:13:11	Anemia
17020101427	Male	16	2020052714:13:11	Anemia of regeneration disorder
18092001457	Female	16	2020052717:13:19	Abnormal myocardium
18092001457	Female	16	2020052717:13:19	Gastritis
20052702255	Female	16	2020052719:16:00	Bacterial infection
20052702255	Female	16	2020052719:16:00	Nausea and vomiting fuTong
20052702255	Female	16	2020052719:16:00	Acute gastritis
18092001457	Female	16	2020052913:40:39	Abnormal myocardium
18092001457	Female	16	2020052913:40:39	Gastritis
19122801065	Female	16	2020053007:49:31	Thyroiditis
161230092785	Female	16	2020053009:41:43	Indigestion
161230092785	Female	16	2020053009:41:43	Disgusting
20052801220	Female	16	2020053011:35:46	Viral infection
20052801220	Female	16	2020053011:35:46	Lymph node enlargement
20052801220	Female	16	2020053011:35:46	Heat
20052801220	Female	16	2020053011:35:46	White cell reduction
20052801220	Female	16	2020053011:35:46	Abdominal pain
20052801220	Female	16	2020053012:22:51	Viral infection?
20052801220	Female	16	2020053012:22:51	Heat
20052801220	Female	16	2020053012:22:51	Abdominal pain
17020101427	Male	16	2020053112:14:54	Anemia
17020101427	Male	16	2020053112:14:54	Anemia of regeneration disorder
18092001457	Female	16	2020060117:33:56	Gastritis
18092001457	Female	16	2020060117:33:56	Abnormal myocardium
19022601573	Female	16	2020060209:47:56	Respiratory infections
19022601573	Female	16	2020060209:47:56	Heat
17090602690	Male	16	2020060313:54:27	Chest pain
17090602690	Male	16	2020060313:54:27	Tachycardia
17090602690	Male	16	2020060313:54:27	Chest stuffy
18092001457	Female	16	2020060418:29:46	Abnormal myocardium
18092001457	Female	16	2020060418:29:46	Gastritis
19022601573	Female	16	2020060614:09:27	Heat
19121300536	Male	16	2020060720:23:14	Gastritis
19121300536	Male	16	2020060720:23:14	Abdominal pain
20060701977	Female	16	2020060723:08:25	Gastritis
20060701977	Female	16	2020060723:08:25	Abdominal pain
20060801201	Male	16	2020060811:45:23	Respiratory infections
18092001457	Female	16	2020060917:12:10	Abnormal myocardium
18092001457	Female	16	2020060917:12:10	Gastritis
20052801220	Female	16	2020061016:30:05	Abdominal pain
20061002465	Male	16	2020061021:24:23	Hypertension
20061100407	Female	16	2020061110:58:55	Headache
20011201415	Female	16	2020061122:31:14	Chest stuffy
18092001457	Female	16	2020061209:19:34	Gastritis
18092001457	Female	16	2020061209:19:34	Abnormal myocardium
20061000245	Female	16	2020061315:49:15	Diarrhea
20061000245	Female	16	2020061315:49:15	Disgusting
17020101427	Male	16	2020061412:03:02	Anemia
17020101427	Male	16	2020061412:03:02	Anemia of regeneration disorder
20061401662	Male	16	2020061418:42:45	Be palpitations
18092001457	Female	16	2020061517:26:06	Myocarditis?
18092001457	Female	16	2020061611:18:10	Lackluster
18092001457	Female	16	2020061611:18:10	Abnormal myocardium
20061700617	Female	16	2020061708:56:33	Gastritis
20061700617	Female	16	2020061708:56:33	Abdominal pain
17020101427	Male	16	2020061712:06:07	Anemia
18081801596	Female	16	2020061908:26:32	Chest stuffy
17020101427	Male	16	2020062012:02:16	Anemia
17020101427	Male	16	2020062012:02:16	Anemia of regeneration disorder
20062200967	Female	16	2020062210:58:39	Unconscious
20060601302	Male	16	2020062313:11:38	Gastritis
20060601302	Male	16	2020062313:11:38	Drug poisoning
18092001457	Female	16	2020062317:30:39	Gastritis?
18092001457	Female	16	2020062317:30:39	Abnormal myocardium
18092001457	Female	16	2020062317:30:39	Myocarditis?
19092601661	Male	16	2020062422:56:55	Alcohol poisoning
19092601661	Male	16	2020062422:56:55	Gastritis
20062701885	Male	16	2020062722:43:27	Dizziness
18092001457	Female	16	2020062811:55:41	Myocarditis?
18092001457	Female	16	2020062811:55:41	Gastritis?
18092001457	Female	16	2020062811:55:41	Abnormal myocardium
20062801613	Female	16	2020062817:10:02	Heat
20062801613	Female	16	2020062817:10:02	Lymph node enlargement
20051801140	Male	16	2020062822:56:46	Gastritis
20051801140	Male	16	2020062822:56:46	Abdominal pain
20062802220	Male	16	2020062823:06:41	Bacterial infection
20062802220	Male	16	2020062823:06:41	Acute gastritis
20062802220	Male	16	2020062823:06:41	Abdominal pain
18092001457	Female	16	2020062911:34:11	Myocarditis?
18092001457	Female	16	2020062911:34:11	Gastritis?
18092001457	Female	16	2020062911:34:11	Abnormal myocardium
20062801613	Female	16	2020062916:43:18	Heat
20062801613	Female	16	2020062916:43:18	Viral infection?
20062801613	Female	16	2020062916:43:18	Lymph node enlargement
20051801140	Male	16	2020062916:55:08	Bacterial infection
20051801140	Male	16	2020062916:55:08	Abdominal pain
20063002020	Male	16	2020063019:04:59	Abdominal pain
20070100030	Male	16	2020070103:24:26	Alcohol poisoning
20070200687	Male	16	2020070209:14:36	Chest pain
18122000221	Male	16	2020070309:02:20	Proteinuria?
19072300485	Female	16	2020070416:01:49	Medical examination
19122501049	Male	16	2020070506:17:18	Gastritis
19122501049	Male	16	2020070506:17:18	Walnut clamp syndrome
19122501049	Male	16	2020070506:17:18	Vomiting
20070501508	Female	16	2020070516:39:33	Bacterial infection
20070501508	Female	16	2020070516:39:33	Acute lymphocytic leukemia
20070501508	Female	16	2020070516:39:33	Heat
20070501508	Female	16	2020070516:39:33	Whole blood cell reduction
20070501508	Female	16	2020070516:39:33	Acute gastric mucosal disease
20070501876	Male	16	2020070520:29:02	Foreign bodies in the air duct?
20070501508	Female	16	2020070522:39:24	Acute lymphocytic leukemia
20070501508	Female	16	2020070522:39:24	Heat
19072301482	Female	16	2020070607:51:32	Dizziness
20070501075	Female	16	2020070610:20:33	Upper abdominal pain
18092001457	Female	16	2020070617:08:36	Myocarditis?
18092001457	Female	16	2020070617:08:36	Gastritis?
20070700029	Male	16	2020070702:56:33	Acute alcohol poisoning
20070701232	Male	16	2020070711:09:49	Lackluster
20070701990	Female	16	2020070715:54:42	Abdominal pain
17020101427	Male	16	2020070815:23:36	Anemia
18092001457	Female	16	2020070913:07:15	Myocarditis?
18092001457	Female	16	2020070913:07:15	Abnormal myocardium
18092001457	Female	16	2020070913:07:15	Gastritis?
20070802746	Female	16	2020071008:41:32	Lackluster
17020101427	Male	16	2020071112:05:17	Anemia
20071102178	Male	16	2020071118:20:30	Bacterial infection
20071102178	Male	16	2020071118:20:30	Chest esophagus damage
20071102178	Male	16	2020071118:20:30	Foreign material in the digestive tract
17010237987	Male	16	2020071307:59:15	Chest stuffy
20071400045	Female	16	2020071406:43:40	Syncope
18092001457	Female	16	2020071412:42:06	Myocarditis?
18092001457	Female	16	2020071412:42:06	Gastritis?
20071500037	Female	16	2020071503:51:14	Gastritis
20071500037	Female	16	2020071503:51:14	Drug poisoning
20071500840	Female	16	2020071509:36:34	Bacterial infection
20071500840	Female	16	2020071509:36:34	Respiratory infections
20071500840	Female	16	2020071509:36:34	Heat
20011400212	Male	16	2020071605:55:45	Liver damage
20071500840	Female	16	2020071613:35:06	Respiratory infections
20071601610	Female	16	2020071710:03:16	Lackluster
20071601610	Female	16	2020071710:03:16	Thin
20071500840	Female	16	2020071714:54:04	Respiratory infections
20071601610	Female	16	2020071808:33:39	Lackluster
20071601610	Female	16	2020071808:33:39	Thin
20071601610	Female	16	2020071808:33:39	White cell reduction
20071802181	Male	16	2020071820:27:13	Supraventricular tachycardia
20072100484	Male	16	2020072108:08:56	Vomiting
20071601610	Female	16	2020072115:05:53	Lackluster
20071601610	Female	16	2020072115:05:53	Thin
19051800304	Female	16	2020072211:48:33	Chest stuffy
20072201599	Male	16	2020072213:39:00	Bacterial infection
20072201599	Male	16	2020072213:39:00	Respiratory infections
20072302316	Female	16	2020072319:06:08	Foreign matter in esophagus?
17052000534	Female	16	2020072608:54:54	Hepatic legumes are denatured
18092001457	Female	16	2020072815:29:22	Myocarditis?
18092001457	Female	16	2020072815:29:22	Abnormal myocardium
18092001457	Female	16	2020072815:29:22	Gastritis?
18090602643	Female	16	2020072820:59:14	Allergic reactions
17020101427	Male	16	2020072909:12:42	Anemia
20072902077	Female	16	2020072917:20:57	Bacterial infection
20072902077	Female	16	2020072917:20:57	Abdominal pain
20042601543	Male	16	2020072920:45:21	Abdominal pain
20071601610	Female	16	2020073110:32:10	The reasons for the reduction are still to be examined
20071601610	Female	16	2020073110:32:10	The lack of strength is still to be checked
17020101427	Male	16	2020073112:17:26	Anemia
20080100404	Male	16	2020080117:27:13	Bacterial infection
20080100404	Male	16	2020080117:27:13	Heat
20080100404	Male	16	2020080218:05:56	Bacterial infection
20080100404	Male	16	2020080218:05:56	Abdominal pain
20080100404	Male	16	2020080218:05:56	Heat
20080301569	Female	16	2020080312:31:57	Abdominal pain
20061200430	Male	16	2020080409:30:43	Diarrhea
20061200430	Male	16	2020080409:30:43	Bacterial infection
20061200430	Male	16	2020080409:30:43	Gastritis
20061200430	Male	16	2020080409:30:43	Abdominal pain
20071601610	Female	16	2020080414:52:41	Anemia
20071601610	Female	16	2020080414:52:41	White cell reduction
20080501111	Female	16	2020080608:00:40	Lackluster
20080501111	Female	16	2020080608:00:40	Dizziness
18111203054	Female	16	2020080803:43:12	Chest stuffy
18111203054	Female	16	2020080803:43:12	Breathing
20080901955	Female	16	2020080919:48:32	Foreign matter in esophagus?
20081002998	Male	16	2020081023:33:09	Bacterial infection
20081002998	Male	16	2020081023:33:09	Abdominal pain
20081002998	Male	16	2020081023:33:09	Heat
20081101365	Male	16	2020081112:04:33	Medical examination
20081002998	Male	16	2020081119:52:59	Bacterial infection
20081002998	Male	16	2020081119:52:59	Abdominal pain
17020101427	Male	16	2020081315:29:35	Anemia
20081302137	Male	16	2020081319:04:06	Chest stuffy
20081302467	Female	16	2020081321:41:44	Abdominal pain
20081302467	Female	16	2020081321:41:44	Syncope
20081400880	Female	16	2020081409:50:56	Anemia
20081400880	Female	16	2020081409:50:56	Increased creatine kinase
20081400880	Female	16	2020081409:50:56	Chest stuffy
20081400880	Female	16	2020081410:01:59	Chest stuffy
20081301921	Male	16	2020081510:08:05	Medical examination
20042601543	Male	16	2020081614:41:52	Chest pain
20060601497	Female	16	2020081710:25:53	Bacterial infection
20060601497	Female	16	2020081710:25:53	Whole blood cell reduction
20060601497	Female	16	2020081710:25:53	Gastritis
20060601497	Female	16	2020081710:25:53	Intestinal bacterial group disorders
20060601497	Female	16	2020081710:25:53	Abdominal pain
20060601497	Female	16	2020081710:25:53	Vomiting
20060601497	Female	16	2020081710:25:53	Heat
20060601497	Female	16	2020081710:25:53	Systemic lupus erythematosus
20060601497	Female	16	2020081711:31:53	Whole blood cell reduction
20060601497	Female	16	2020081711:31:53	Vomiting
20060601497	Female	16	2020081711:31:53	Heat
20060601497	Female	16	2020081711:31:53	Sepsis
20060601497	Female	16	2020081711:31:53	Hypokalemia
20060601497	Female	16	2020081711:31:53	Diarrhea
20060601497	Female	16	2020081711:31:53	Systemic lupus erythematosus
20060601497	Female	16	2020081711:31:53	Abdominal pain
17020101427	Male	16	2020081712:58:10	Anemia
20080301662	Female	16	2020081915:01:22	Bacterial infection
20080301662	Female	16	2020081915:01:22	Pulmonary infection
20080301662	Female	16	2020081915:01:22	Systemic lupus erythematosus?
20080301662	Female	16	2020081915:01:22	Infectious fever
20080301662	Female	16	2020081915:01:22	White cell reduction
20080301662	Female	16	2020081915:01:22	Gastritis
20042601543	Male	16	2020081921:30:31	Chest pain
20081801198	Female	16	2020082009:30:21	Cough
18092001457	Female	16	2020082010:31:03	Gastritis?
18092001457	Female	16	2020082010:31:03	Abnormal myocardium
18092001457	Female	16	2020082010:31:03	Myocarditis?
20081700995	Male	16	2020082307:41:50	The transverse muscle is dissolved
161230071663	Male	16	2020082506:34:47	Hyperlipidemia
18052900286	Male	16	2020082508:52:38	Diarrhea
19012100574	Female	16	2020082509:10:24	Lumbar pain
19012100574	Female	16	2020082509:10:24	Chest pain
20082401132	Female	16	2020082509:44:36	Anemia
17020101427	Male	16	2020082514:58:57	Anemia
20082600482	Male	16	2020082608:38:25	Dizziness
19080300627	Male	16	2020082807:33:13	Medical examination
20082600482	Male	16	2020082808:12:11	Ureq
20082600482	Male	16	2020082808:12:11	Causes of dizziness are to be examined
20082800626	Female	16	2020082809:22:17	Abdominal pain
20082801064	Male	16	2020082810:44:34	Medical examination
20081301921	Male	16	2020082913:52:34	Medical examination
20083102065	Male	16	2020083117:15:50	Cough
20083102065	Male	16	2020083117:15:50	Bronchitis
17020101427	Male	16	2020090111:14:20	Anemia
20090102194	Male	16	2020090116:29:18	Chest pain
20083102065	Male	16	2020090118:56:10	Bacterial infection
20083102065	Male	16	2020090118:56:10	Bronchitis
19080100037	Female	16	2020090123:08:57	Be palpitations
20090102898	Male	16	2020090200:01:35	Bronchial asthma
20082400436	Male	16	2020090211:39:04	Epilepsy
20083102065	Male	16	2020090218:52:36	Bronchitis
20083102065	Male	16	2020090218:52:36	Bacterial infection
19122801839	Male	16	2020090312:49:46	Chest stuffy
20090501702	Male	16	2020090514:01:35	Be palpitations
19121801521	Male	16	2020090514:48:43	Urinary tract infection
19121801521	Male	16	2020090514:48:43	Bacterial infection
19121801521	Male	16	2020090514:48:43	Heat
18092001457	Female	16	2020090611:19:38	Myocarditis?
18092001457	Female	16	2020090611:19:38	Gastritis?
18092001457	Female	16	2020090611:19:38	Abnormal myocardium
20090601299	Female	16	2020090612:52:57	Drug poisoning
20090602271	Female	16	2020090621:03:07	Abdominal pain
19042202660	Female	16	2020090714:43:15	Abnormal liver function
19042202660	Female	16	2020090714:43:15	Anemia
19031501859	Male	16	2020090717:12:29	Cough variability asthma
20090702918	Male	16	2020090720:14:20	Be palpitations
20090703078	Male	16	2020090721:31:02	Asthma?
20090703078	Male	16	2020090721:31:02	Breathing
20090800632	Male	16	2020090809:06:40	Gastritis
20090800632	Male	16	2020090809:06:40	Bacterial infection
20090800632	Male	16	2020090809:06:40	Vomiting
20090802777	Female	16	2020090820:52:11	Chest pain
19042202660	Female	16	2020090912:32:57	Anemia
20090901818	Male	16	2020090914:19:12	Abdominal pain
20090901818	Male	16	2020090914:19:12	Gastritis
20090902024	Female	16	2020090915:21:59	Hyperthyroidism
20091102239	Female	16	2020091118:28:38	Chest pain
20090703070	Female	16	2020091200:02:29	Cough
20091200628	Female	16	2020091208:48:57	Gastritis
20091200628	Female	16	2020091208:48:57	Bacterial infection
20091200628	Female	16	2020091208:48:57	Abdominal pain
20073101796	Male	16	2020091208:50:47	Respiratory infections
20073101796	Male	16	2020091208:50:47	Lackluster
20091101245	Male	16	2020091209:52:01	Lackluster
20051802545	Female	16	2020091216:08:17	Abdominal pain
19082401659	Male	16	2020091219:43:17	Viral infection?
19082401659	Male	16	2020091219:43:17	Infectious fever
20091300058	Male	16	2020091304:42:06	Chest pain
20091301060	Male	16	2020091311:25:22	Ketosis
20091301060	Male	16	2020091311:25:22	Gastritis
20091301060	Male	16	2020091311:25:22	Vomiting
20091301060	Male	16	2020091311:25:22	Abdominal pain
20091301497	Male	16	2020091315:25:05	Be palpitations
18010201217	Male	16	2020091404:20:28	Abdominal pain
18010201217	Male	16	2020091404:20:28	Indigestion
17041700113	Female	16	2020091409:05:48	Eosinophils
17041700113	Female	16	2020091409:05:48	Allergic rhinitis [allergic rhinitis]
19040701625	Female	16	2020091410:52:08	Respiratory infections
19040701625	Female	16	2020091410:52:08	Cough
20091401944	Male	16	2020091414:15:31	Bleeding of the nose
20091401944	Male	16	2020091414:15:31	Hypercalcemia
20073101796	Male	16	2020091514:37:30	Lackluster
20091501945	Female	16	2020091517:48:44	Bacterial infection
20091501945	Female	16	2020091517:48:44	Electrolyte metabolism disorders
20091501945	Female	16	2020091517:48:44	Heat
18120901632	Female	16	2020091611:24:53	Chest pain
17020101427	Male	16	2020091613:52:22	Anemia
17121001644	Female	16	2020091615:27:21	Gastritis
17121001644	Female	16	2020091615:27:21	Abdominal pain
20091501772	Female	16	2020091702:52:26	Respiratory infections
20091501772	Female	16	2020091702:52:26	Bacterial infection
20091501772	Female	16	2020091715:59:34	Respiratory infections
20091501772	Female	16	2020091715:59:34	Bacterial infection
19112202598	Female	16	2020091719:39:08	Chest pain
19112202598	Female	16	2020091719:39:08	Bacterial infection
18072602029	Female	16	2020091720:23:32	Bacterial infection
18072602029	Female	16	2020091720:23:32	Respiratory infections
18072602029	Female	16	2020091720:23:32	Cough
20091800267	Male	16	2020091807:43:43	Abdominal pain
20091800267	Male	16	2020091807:43:43	Diabetes
20091800267	Male	16	2020091807:43:43	Gastritis
20091702748	Male	16	2020091809:15:29	Syncope
17020101427	Male	16	2020091810:11:58	Anemia
20091801564	Female	16	2020091814:28:20	Syncope
20091800241	Female	16	2020091907:34:33	Edema
20091900359	Female	16	2020091908:01:47	Bacterial infection
20091900359	Female	16	2020091908:01:47	Urinary tract infection
20091900359	Female	16	2020091908:01:47	Urinal pain
18111101212	Male	16	2020091913:41:53	Dizziness
20091901968	Female	16	2020091917:23:54	Lymph node inflammation
20091901968	Female	16	2020091917:23:54	Regional lymph node enlargement
20091901968	Female	16	2020091917:23:54	Bacterial infection
20091901992	Female	16	2020091917:43:05	Reflux oesophagitis
20091702748	Male	16	2020092008:32:50	Syncope
20092000406	Male	16	2020092008:34:05	Ketosis
20092000406	Male	16	2020092008:34:05	Gastritis
20092000406	Male	16	2020092008:34:05	Vomiting
20060300539	Female	16	2020092103:48:12	Cough variability asthma?
20060300539	Female	16	2020092103:48:12	Cough
20060800667	Male	16	2020092109:18:59	Abdominal pain
20092101267	Female	16	2020092111:07:32	Abdominal pain
17020101427	Male	16	2020092112:19:37	Anemia
19042202660	Female	16	2020092116:27:52	Abnormal liver function
20092102352	Male	16	2020092117:37:21	Vomiting
19012400078	Male	16	2020092120:03:56	Abdominal pain
161230019723	Male	16	2020092211:35:40	Gastritis
161230019723	Male	16	2020092211:35:40	Abdominal pain
161230019723	Male	16	2020092211:35:40	Diarrhea
20092201977	Female	16	2020092216:10:10	Be palpitations
20092201977	Female	16	2020092216:10:10	Chest stuffy
20050700508	Male	16	2020092309:31:13	Fat liver
20050700508	Male	16	2020092309:31:13	Increased blood sugar
20050700508	Male	16	2020092309:31:13	Hypertension
20092301414	Male	16	2020092314:41:27	Hypokalemia
20092301414	Male	16	2020092314:41:27	Lackluster
20092301552	Female	16	2020092315:32:39	Anxiety depression
20092301552	Female	16	2020092315:32:39	Acute gastric mucosal disease
20092301552	Female	16	2020092315:32:39	Drug poisoning
18092001457	Female	16	2020092412:32:06	Gastritis?
18092001457	Female	16	2020092412:32:06	Myocarditis?
18111900485	Female	16	2020092509:32:13	Systemic lupus erythematosus
20092600659	Female	16	2020092609:59:17	Gastritis
20092600659	Female	16	2020092609:59:17	Nausea and vomiting
20092600659	Female	16	2020092609:59:17	Bloating
20092601962	Male	16	2020092619:34:45	Chest pain
19102701878	Female	16	2020092718:36:08	Gastritis
20092802265	Male	16	2020092820:59:52	Foreign material in the digestive tract
20092901481	Female	16	2020092917:09:11	Chest stuffy
20093000009	Female	16	2020093000:38:35	Chest stuffy
20050700508	Male	16	2020093009:33:12	Hypertension
20060401985	Female	16	2020093011:19:56	Hyperthyroidism
20100200749	Female	16	2020100211:07:04	Be palpitations
19042202660	Female	16	2020100310:47:08	Anemia
19062502201	Male	16	2020100410:43:27	Bacterial infection
19062502201	Male	16	2020100410:43:27	Diabetic ketoacidosis
20093001648	Male	16	2020100509:09:31	Syncope
20100502123	Male	16	2020100518:59:26	Acute pancreatitis
19042202660	Female	16	2020100612:56:47	Anemia
17020101427	Male	16	2020100614:27:20	Anemia
20100502123	Male	16	2020100617:39:07	Acute pancreatitis
17080200019	Female	16	2020100621:51:50	Abdominal pain
17080200019	Female	16	2020100621:51:50	Gastritis
20100602458	Male	16	2020100623:15:19	Bacterial infection
20100602458	Male	16	2020100623:15:19	Gastritis
20100602458	Male	16	2020100623:15:19	Abdominal pain
20100701544	Male	16	2020100714:11:27	Acute pancreatitis
20081301921	Male	16	2020100808:04:29	Medical examination
20100801687	Male	16	2020100815:06:38	Acute pancreatitis
20100802456	Female	16	2020100821:32:11	Bacterial infection
20100802456	Female	16	2020100821:32:11	Gastritis
20100802456	Female	16	2020100821:32:11	Abdominal pain
20100900715	Female	16	2020100909:29:55	Chest pain
20100901632	Male	16	2020100913:03:52	Acute pancreatitis
17032902940	Male	16	2020100920:55:28	Headache
17032902940	Male	16	2020100920:55:28	Bacterial infection
17032902940	Male	16	2020100920:55:28	Eating disorders
20062601657	Male	16	2020101008:07:45	Hyperlipidemia
20062601657	Male	16	2020101008:07:45	Liver function is not complete
20062601657	Male	16	2020101008:07:45	White cell reduction
17020101427	Male	16	2020101012:51:11	Anemia of regeneration disorder
17020101427	Male	16	2020101012:51:11	Anemia
20101001809	Male	16	2020101014:22:57	Chronic pancreatitis
19122600879	Female	16	2020101016:17:22	Gastritis?
19122600879	Female	16	2020101016:17:22	Abdominal pain
17121000729	Female	16	2020101108:41:57	Medical examination
20101101173	Male	16	2020101111:45:40	Acute pancreatitis
20101102357	Female	16	2020101121:12:44	Abdominal pain
20101200325	Male	16	2020101208:01:10	Vomiting
20101200325	Male	16	2020101208:01:10	Dizziness
20101200325	Male	16	2020101210:23:49	Nausea and vomiting
20101200325	Male	16	2020101210:23:49	Syncope
20101200325	Male	16	2020101210:23:49	Lackluster
20101201270	Female	16	2020101211:28:43	Bacterial infection
20101201270	Female	16	2020101211:28:43	Respiratory alkaline poisoning
20101201270	Female	16	2020101211:28:43	Hypokalemia
20101201270	Female	16	2020101211:28:43	Breathing
20101201270	Female	16	2020101211:28:43	Asthma?
20101201270	Female	16	2020101211:28:43	Urinary tract infection
20062601657	Male	16	2020101214:17:16	Edema
20062601657	Male	16	2020101214:17:16	Abnormal liver function
20101202259	Male	16	2020101215:24:56	Pituitary function is poor
20101202437	Female	16	2020101216:12:46	Allergic purpura
20101202437	Female	16	2020101216:12:46	Abdominal pain
20101202530	Female	16	2020101216:41:12	Abdominal pain
20101202437	Female	16	2020101216:49:08	Allergic purpura
20101202437	Female	16	2020101216:49:08	Abdominal pain
18051400021	Male	16	2020101218:50:47	Diarrhea
20101202674	Female	16	2020101218:51:15	Foreign matter in esophagus?
20101300001	Female	16	2020101300:04:20	Abdominal pain
20101201270	Female	16	2020101308:09:05	Bacterial infection
20101201270	Female	16	2020101308:09:05	Electrolyte metabolism disorders
20101201270	Female	16	2020101308:09:05	Asthma?
20101301492	Male	16	2020101312:24:02	Chest pain
20081302488	Male	16	2020101316:30:54	Be palpitations
20101100270	Male	16	2020101409:10:38	Stomach expansion
20101100270	Male	16	2020101409:10:38	EB virus infection?
20101100270	Male	16	2020101409:10:38	Haematuria under the mirror
20101100270	Male	16	2020101409:10:38	Expansion of the bowel
20101401062	Female	16	2020101410:15:41	Be palpitations
20050700508	Male	16	2020101410:39:01	Hypertension
20050700508	Male	16	2020101412:53:53	Hypertension
20101203086	Female	16	2020101414:00:04	Heat
20101402069	Female	16	2020101415:19:14	Lackluster
20101402069	Female	16	2020101415:19:14	Edema
20101501804	Male	16	2020101514:37:13	Abdominal pain
20101601749	Male	16	2020101614:37:21	Abdominal pain
20101102357	Female	16	2020101710:52:17	Abdominal pain
20101702362	Male	16	2020101721:58:13	Abdominal pain
16123187798	Female	16	2020101813:22:13	Vomiting
16123187798	Female	16	2020101813:22:13	Abdominal pain
17020101427	Male	16	2020101813:25:16	Anemia
18072602029	Female	16	2020101819:15:41	Chest pain
20051401253	Female	16	2020101912:41:05	Chest stuffy
20102002528	Female	16	2020102020:08:49	Abdominal pain
20102100050	Female	16	2020102104:02:50	Bacterial infection
20102100050	Female	16	2020102104:02:50	Vomiting
20102100050	Female	16	2020102104:02:50	Gastritis
20102100050	Female	16	2020102104:02:50	Abdominal pain
20102200375	Male	16	2020102208:07:32	Vomiting
17071501257	Male	16	2020102210:29:58	Abdominal pain
17071501257	Male	16	2020102210:29:58	Acute gastritis
17081900459	Male	16	2020102413:31:57	Gastritis
19032401782	Female	16	2020102506:36:18	Abdominal pain
18030800577	Female	16	2020102608:31:42	Medical examination
20102600703	Male	16	2020102609:16:14	Bacterial infection
20102600703	Male	16	2020102609:16:14	Acute gastritis
20102600703	Male	16	2020102609:16:14	Abdominal pain
20102602155	Male	16	2020102615:26:44	Bacterial infection
20102602155	Male	16	2020102615:26:44	Ketosis
20102602155	Male	16	2020102615:26:44	Abdominal pain
20102602155	Male	16	2020102615:26:44	Gastritis
20102602155	Male	16	2020102615:26:44	Vomiting
20102602895	Female	16	2020102620:45:16	Abdominal pain
17062201462	Female	16	2020102911:27:00	Be palpitations
17020101427	Male	16	2020102914:30:32	Anemia
20103000229	Female	16	2020103009:41:54	Chest stuffy
20102701279	Female	16	2020103108:28:15	Disgusting
20103101375	Male	16	2020103113:25:59	Acute cervical lymphadenitis
20103101375	Male	16	2020103113:25:59	Lymph node enlargement
20103101375	Male	16	2020103113:25:59	Infectious monocytosis?
17020101427	Male	16	2020110113:06:32	Anemia
20110201793	Male	16	2020110214:04:28	Bacterial infection
20110201793	Male	16	2020110214:04:28	Dizziness
20110300048	Male	16	2020110306:07:13	Hypertension
19122201404	Female	16	2020110307:40:01	Be palpitations
19122201404	Female	16	2020110307:40:01	Gastritis
19051102632	Female	16	2020110313:13:07	Disgusting
19051102632	Female	16	2020110313:13:07	Abdominal pain
20103101375	Male	16	2020110314:01:07	Acute cervical lymphadenitis
20102202481	Male	16	2020110415:42:55	Secondary hypertension?
20102202481	Male	16	2020110415:42:55	Hypertension
20110402839	Male	16	2020110423:07:28	Chest pain
20110402839	Male	16	2020110423:07:28	Bronchial asthma
20110802005	Female	16	2020110821:21:03	Chest stuffy
17010224434	Female	16	2020110910:26:44	Chest stuffy
20110901110	Male	16	2020110910:58:20	Mixed allergic purpura
20110901110	Male	16	2020110910:58:20	Abdominal pain
20110901110	Male	16	2020110910:58:20	Allergic purpura
20110901110	Male	16	2020110912:30:17	Abdominal pain
20110901110	Male	16	2020110912:30:17	And then the blood
20110901110	Male	16	2020110912:30:17	Allergic purpura
17020101427	Male	16	2020110914:36:10	Anemia
18120901955	Female	16	2020110914:50:59	Bacterial infection
18120901955	Female	16	2020110914:50:59	Gastritis
18120901955	Female	16	2020110914:50:59	Diarrhea
18120901955	Female	16	2020110914:50:59	Abdominal pain
20110902233	Male	16	2020110916:31:28	Cough
20062601657	Male	16	2020111107:54:08	Edema
20062601657	Male	16	2020111107:54:08	Abnormal liver function
20062601657	Male	16	2020111110:01:08	Abnormal liver function
20062601657	Male	16	2020111110:01:08	Hyperuricaemia
20062601657	Male	16	2020111110:01:08	Edema
20111101611	Male	16	2020111113:45:52	Gastritis
20111101611	Male	16	2020111113:45:52	Abdominal pain
20111200366	Male	16	2020111209:29:30	Lackluster
19101100172	Male	16	2020111210:00:17	Abdominal pain
20111102725	Female	16	2020111213:40:55	Heat
20092101295	Male	16	2020111214:50:45	Chest pain
18082002622	Male	16	2020111215:32:09	Abdominal pain
20111300691	Male	16	2020111316:10:17	Chest pain
20111302096	Female	16	2020111316:25:46	Respiratory infections
20111502175	Male	16	2020111522:18:47	Chest stuffy
19101100277	Male	16	2020111606:50:10	Hypercalcemia
19101100277	Male	16	2020111606:50:10	Chest stuffy
20062601657	Male	16	2020111607:45:56	White cell reduction
20062601657	Male	16	2020111607:45:56	Edema
20062601657	Male	16	2020111607:45:56	Spleen
20062601657	Male	16	2020111607:45:56	Abnormal liver function
20111101919	Female	16	2020111708:13:02	Chest pain
20111701528	Male	16	2020111713:56:21	Digestive bleeding
20111701528	Male	16	2020111713:56:21	Duodenal ulcer
20111500812	Male	16	2020111714:24:56	The cause of heat is pending
20102202481	Male	16	2020111809:43:41	Hypertension
20110901110	Male	16	2020111814:44:20	Allergic purpura
19021700615	Female	16	2020111815:30:09	Discomfort
18041900329	Female	16	2020111819:22:21	Chest stuffy
20111500812	Male	16	2020111914:02:38	The cause of heat is pending
20111500812	Male	16	2020111915:38:53	The cause of heat is pending
20112002296	Female	16	2020112019:36:37	Electrolyte metabolism disorders
20112002296	Female	16	2020112019:36:37	Be palpitations
20112002296	Female	16	2020112019:36:37	Chest stuffy
20111102725	Female	16	2020112209:10:41	Chest pain
20112300020	Female	16	2020112302:02:42	Gastritis
20112300020	Female	16	2020112302:02:42	Abdominal pain
20112300020	Female	16	2020112302:02:42	Bacterial infection
19101100277	Male	16	2020112307:43:15	Hyperuricaemia
19101100277	Male	16	2020112307:43:15	Increased creatine kinase
19101100277	Male	16	2020112307:43:15	Hypercalcemia
20112400035	Male	16	2020112405:31:55	Viral infection?
20112400035	Male	16	2020112405:31:55	Abnormal liver function
20112400035	Male	16	2020112405:31:55	Heat
17020101427	Male	16	2020112411:51:30	Anemia
17010224434	Female	16	2020112415:51:47	Chest stuffy
20060401985	Female	16	2020112416:08:42	Hyperthyroidism
20112500017	Male	16	2020112500:55:16	Hives
20112500017	Male	16	2020112500:55:16	Urinary tract infection?
20112500017	Male	16	2020112500:55:16	Anti-acid
19121001961	Female	16	2020112508:34:23	Iron deficiency anemia
19121001961	Female	16	2020112508:34:23	Dizziness
17033102790	Male	16	2020112510:39:00	Chest pain
17091300709	Male	16	2020112511:25:32	Be palpitations
18072201133	Male	16	2020112512:18:28	Upper respiratory tract infection?
20112501771	Male	16	2020112515:40:24	Heat
20112501771	Male	16	2020112515:40:24	Liver damage
20112501771	Male	16	2020112515:40:24	Viral infection
20112501930	Female	16	2020112516:56:06	Chest pain
17010224434	Female	16	2020112606:35:20	Chest stuffy
20112600278	Male	16	2020112610:11:34	Gastritis
20112700917	Male	16	2020112711:11:13	Chest stuffy
18072200870	Female	16	2020112722:07:29	Stomach pain
20112002229	Male	16	2020112808:47:01	Allergic purpura?
20112002229	Male	16	2020112808:47:01	Abdominal pain
20112800787	Female	16	2020112810:37:32	Abdominal pain
20112800787	Female	16	2020112810:37:32	Gastritis
20082100503	Male	16	2020113014:46:36	Lymph node inflammation
20113001727	Female	16	2020113014:57:29	Abdominal pain
20120200960	Female	16	2020120210:51:37	Abdominal pain
18041900329	Female	16	2020120307:01:27	Respiratory infections
18041900329	Female	16	2020120307:01:27	Gastritis
20120300513	Male	16	2020120309:16:19	Abdominal pain
17101500807	Male	16	2020120314:29:42	Hypertension
20101201270	Female	16	2020120321:33:21	Bacterial infection
20101201270	Female	16	2020120321:33:21	Asthma
20120401262	Male	16	2020120413:04:49	Abdominal pain
20120401262	Male	16	2020120413:04:49	Gastritis
20120401972	Female	16	2020120417:51:56	Medical examination
17020101427	Male	16	2020120513:36:16	Anemia
20120600034	Female	16	2020120603:34:51	Diarrhea
20120600034	Female	16	2020120603:34:51	Allergic reactions
19080100465	Male	16	2020120620:39:15	Hypertension
19121100133	Male	16	2020120701:36:30	Disgusting
19121100133	Male	16	2020120701:36:30	Dizziness
20120701567	Female	16	2020120714:08:59	Gastritis
20120701567	Female	16	2020120714:08:59	Abdominal pain
20120702320	Male	16	2020120721:05:19	Abdominal pain
20120900831	Female	16	2020120909:59:32	Disgusting
20120901441	Male	16	2020120913:05:13	Chest pain
20120901746	Female	16	2020120914:39:47	Gastritis
20120901746	Female	16	2020120914:39:47	Abdominal pain
20120901639	Female	16	2020120915:30:08	Haemoptysis
20121301591	Female	16	2020121318:55:05	Allergic purpura?
17020101427	Male	16	2020121413:22:46	Anemia
20110901110	Male	16	2020121413:45:33	Bacterial infection
20110901110	Male	16	2020121413:45:33	Allergic purpura
20121401639	Female	16	2020121414:36:32	Gastritis
20121401639	Female	16	2020121414:36:32	Abdominal pain
20121401705	Female	16	2020121414:52:32	Gastritis
20121401705	Female	16	2020121414:52:32	Abdominal pain
20061000245	Female	16	2020121506:48:24	Gastritis
20061000245	Female	16	2020121506:48:24	Indigestion
20061000245	Female	16	2020121506:48:24	Intestinal bacterial group disorders
20061000245	Female	16	2020121506:48:24	Abdominal pain
17020101427	Male	16	2020121510:40:04	Anemia
20121600190	Male	16	2020121607:30:02	Bacterial infection
20121600190	Male	16	2020121607:30:02	Gastritis
20121600190	Male	16	2020121607:30:02	Vomiting
20121600263	Male	16	2020121608:03:56	Abdominal pain
20121502008	Female	16	2020121609:59:08	Chronic pharyngeitis
20092101267	Female	16	2020121610:31:27	Chest pain
20061201329	Female	16	2020121614:24:22	Abdominal pain
20021700028	Female	16	2020121709:53:40	Headache
20121701389	Male	16	2020121713:13:20	Anemia
20121701389	Male	16	2020121713:13:20	Thrombocytopenia
20121701797	Female	16	2020121811:26:59	Hyperthyroidism
20121701797	Female	16	2020121811:26:59	Bacterial infection
20121701797	Female	16	2020121811:26:59	Heat
20121801189	Male	16	2020121812:18:06	Abdominal pain
18121100125	Female	16	2020122008:06:39	Abdominal pain
19100201094	Female	16	2020122008:43:53	Abdominal pain
17020101427	Male	16	2020122114:11:29	Anemia
20122201736	Female	16	2020122214:59:42	Lymph node enlargement
20122202274	Female	16	2020122409:29:24	Lackluster
20122400610	Male	16	2020122409:30:17	Chest pain
17020101427	Male	16	2020122413:55:16	Anemia
20122600947	Female	16	2020122611:18:06	Gastritis
20122600947	Female	16	2020122611:18:06	Intestinal bacterial group disorders
20122600947	Female	16	2020122611:18:06	Chest stuffy
19040701625	Female	16	2020122617:34:11	Hypertension
20122700397	Male	16	2020122718:53:45	Chest pain
20122700397	Male	16	2020122718:53:45	Heat
17020101427	Male	16	2020122812:03:05	Anemia
20122802247	Female	16	2020122818:22:21	Respiratory infections
17102401869	Male	16	2020122908:54:14	Chronic bronchitis
17102401869	Male	16	2020122908:54:14	Chest pain reasons to be examined
20122901223	Male	16	2020122913:30:49	Chest stuffy
20123000188	Female	16	2020123007:25:58	Abdominal pain
20061000245	Female	16	2020123008:04:06	Indigestion
20061000245	Female	16	2020123008:04:06	Gastritis
20061000245	Female	16	2020123008:04:06	Intestinal bacterial group disorders
20061000245	Female	16	2020123008:04:06	Abdominal pain
20060800667	Male	16	2020123108:18:23	Acute abscess pachian inflammation
20010100071	Female	17	2020010106:06:36	Respiratory infections
20010100071	Female	17	2020010106:06:36	Disgusting
20010100071	Female	17	2020010106:06:36	Lackluster
20010100071	Female	17	2020010106:06:36	Be palpitations
20010100139	Female	17	2020010106:52:41	Liver damage
161230071640	Male	17	2020010107:40:52	Heat
161230071640	Male	17	2020010107:40:52	Bacterial infection
20010101465	Male	17	2020010117:44:32	Respiratory infections
20010101465	Male	17	2020010117:44:32	Heat
18032402216	Male	17	2020010119:37:16	Lackluster
18032402216	Male	17	2020010119:37:16	Gastritis
20010200153	Female	17	2020010206:47:59	Liver damage
17031502396	Female	17	2020010210:15:12	Respiratory tract infection remove
20010202347	Male	17	2020010218:27:05	Respiratory infections
20010202347	Male	17	2020010218:27:05	Heat
20010202354	Female	17	2020010218:29:29	Respiratory infections
20010202354	Female	17	2020010218:29:29	Heat
20010300038	Male	17	2020010305:22:48	Acute gastric mucosal disease
20010300038	Male	17	2020010305:22:48	Alcohol poisoning
20010301994	Female	17	2020010315:38:03	Cough
20010301994	Female	17	2020010315:38:03	Respiratory infections
20010301994	Female	17	2020010315:38:03	Bacterial infection
20010302473	Female	17	2020010320:40:06	Respiratory infections
20010302473	Female	17	2020010320:40:06	Heat
20010302527	Female	17	2020010321:27:28	Vomiting
20010302527	Female	17	2020010321:27:28	Gastritis
20010202354	Female	17	2020010407:05:00	Respiratory infections
20010202354	Female	17	2020010407:05:00	Heat
17010263092	Female	17	2020010613:39:21	Respiratory infections
19122700730	Female	17	2020010709:31:45	Chest stuffy
19120300810	Female	17	2020010909:01:55	Hypertension
20010800227	Male	17	2020010909:02:17	Fat liver
20010800227	Male	17	2020010909:02:17	Tremor in the lower extremities
20010800227	Male	17	2020010909:02:17	Dizziness
20010902262	Male	17	2020010920:07:02	Bacterial infection
20010902262	Male	17	2020010920:07:02	Ketosis
20010902262	Male	17	2020010920:07:02	Abdominal pain
20010902262	Male	17	2020010920:07:02	Nausea and vomiting
19120300810	Female	17	2020011009:56:50	Hypertension
20010901825	Male	17	2020011120:34:55	Heat
20011102150	Male	17	2020011122:35:07	Abdominal pain
20011102150	Male	17	2020011122:35:07	Vomiting
20011200003	Male	17	2020011200:15:08	Bacterial infection
20011200003	Male	17	2020011200:15:08	Pneumonia
20011301452	Female	17	2020011313:13:40	Respiratory infections
20011501205	Male	17	2020011512:03:29	Heat
17010103280	Male	17	2020011613:02:57	Chest pain
20011601914	Male	17	2020011620:36:03	Bacterial infection
20011601914	Male	17	2020011620:36:03	Stress gastritis
20011601914	Male	17	2020011620:36:03	Diarrhea
20011601914	Male	17	2020011620:36:03	Vomiting
20011800033	Female	17	2020011803:24:36	Gastric mucosal lesions
20011800033	Female	17	2020011803:24:36	Alcohol poisoning?
20011801630	Male	17	2020011823:44:11	Chest pain
20011801624	Male	17	2020011913:32:55	Bacterial infection
20011801624	Male	17	2020011913:32:55	Haemoptysis
16123122067	Female	17	2020012022:19:18	Edema
20012101567	Female	17	2020012123:48:26	Respiratory infections
20012300389	Female	17	2020012312:07:47	Respiratory infections
20012300556	Male	17	2020012316:20:24	Bacterial infection
20012300556	Male	17	2020012316:20:24	Electrolyte metabolism disorders
20012300556	Male	17	2020012316:20:24	Acute pancreatitis?
20012300556	Male	17	2020012316:20:24	Allergic purpura?
20012300556	Male	17	2020012316:20:24	Gastritis
20012300556	Male	17	2020012316:20:24	Liver damage
20012300556	Male	17	2020012316:20:24	Abdominal pain
20012500150	Female	17	2020012511:52:35	Viral infection
20012500150	Female	17	2020012511:52:35	Heat
20012400278	Female	17	2020012513:11:46	Asthma
20012400278	Female	17	2020012513:11:46	Mediastinal emphysema
20012400278	Female	17	2020012513:11:46	Respiratory infections
20012400278	Female	17	2020012513:11:46	Heat
20012500386	Male	17	2020012521:33:19	Chest pain
20012500386	Male	17	2020012521:33:19	Lackluster
20012400278	Female	17	2020012610:48:27	Mediastinal emphysema
20012400278	Female	17	2020012610:48:27	Respiratory infections
20012400278	Female	17	2020012610:48:27	Heat
20012600379	Male	17	2020012618:26:30	Intestinal infection
20012600379	Male	17	2020012618:26:30	Heat
20012700118	Male	17	2020012709:41:24	Sepsis
20012700118	Male	17	2020012709:41:24	Bacterial infection
20012700118	Male	17	2020012709:41:24	Influenza
20012700118	Male	17	2020012709:41:24	Severe pneumonia
20012700118	Male	17	2020012709:41:24	Hypoxemia
20012700118	Male	17	2020012709:41:24	Pulmonary infection
20012400278	Female	17	2020012714:22:20	Respiratory infections
20012400278	Female	17	2020012714:22:20	Asthma?
20012400278	Female	17	2020012714:22:20	Mediastinal emphysema
19060901416	Female	17	2020012720:27:46	Chest pain
20012700499	Female	17	2020012721:55:54	Jaundice
20012700499	Female	17	2020012721:55:54	Liver damage
20012700499	Female	17	2020012721:55:54	Hemolytic anemia
20012900567	Female	17	2020012923:58:14	Bacterial infection
20012900567	Female	17	2020012923:58:14	Nausea and vomiting
20012900567	Female	17	2020012923:58:14	Acute gastritis
20013000044	Male	17	2020013006:40:34	Duodenal ulcer
20013000044	Male	17	2020013006:40:34	Liver damage
20013000044	Male	17	2020013006:40:34	Bacterial infection
20013000044	Male	17	2020013006:40:34	Abdominal pain
20013000473	Female	17	2020013016:27:48	Bacterial infection
20013000473	Female	17	2020013016:27:48	Heat
20013100145	Female	17	2020013109:45:53	Bacterial infection
20013100145	Female	17	2020013109:45:53	Abdominal pain
20013100145	Female	17	2020013109:45:53	Acute gastritis
20020100176	Female	17	2020020110:47:54	Bacterial infection
20020100176	Female	17	2020020110:47:54	Abdominal pain
20020300045	Male	17	2020020307:46:43	Pulmonary infection
20022500227	Male	17	2020031811:43:17	Spleen
20022500227	Male	17	2020031811:43:17	Lymphocytosis
19081001193	Female	17	2020032512:03:13	Anemia
19081001193	Female	17	2020032512:03:13	Urinary tract infection
19081001193	Female	17	2020032512:03:13	Bacterial infection
19081001193	Female	17	2020032512:03:13	Ketosis
19081001193	Female	17	2020032512:03:13	Abdominal pain
19081001193	Female	17	2020032512:03:13	Vomiting
19081001193	Female	17	2020032512:03:13	Chronic gastritis
19081001193	Female	17	2020032710:52:38	Urinary tract infection
19081001193	Female	17	2020032710:52:38	Bacterial infection
19081001193	Female	17	2020032710:52:38	Ketosis
20031900442	Male	17	2020033109:37:35	Old brain hemorrhage
20031900442	Male	17	2020033109:37:35	Liver function is not complete
20031900442	Male	17	2020033109:37:35	Anemia of regeneration disorder
20040101901	Male	17	2020040307:30:18	Heat
19051301669	Female	17	2020040517:10:50	Anemia
19051301669	Female	17	2020040810:08:06	Anemia of regeneration disorder
19051301669	Female	17	2020040810:08:06	Anemia
19051301669	Female	17	2020040810:08:06	Thrombocytopenia
19082300428	Male	17	2020041218:32:23	Gastritis
19051301669	Female	17	2020041310:18:16	Thrombocytopenia
19051301669	Female	17	2020041310:18:16	Digestive bleeding
19051301669	Female	17	2020041509:53:46	Thrombocytopenia
19051301669	Female	17	2020041509:53:46	Anemia of regeneration disorder
19051301669	Female	17	2020041509:53:46	Anemia
19051301669	Female	17	2020041509:53:46	Digestive bleeding
20041702351	Male	17	2020041722:53:11	Vomiting
20041800661	Male	17	2020041809:13:25	Heat
20042201994	Female	17	2020042218:17:53	Bacterial infection
20042201994	Female	17	2020042218:17:53	Gastritis
20042201994	Female	17	2020042218:17:53	Abdominal pain
20041800661	Male	17	2020042313:32:10	Heat
20042302193	Male	17	2020042322:26:56	Bacterial infection
20042302193	Male	17	2020042322:26:56	Respiratory infections
20042302193	Male	17	2020042322:26:56	Asthma
20042402039	Female	17	2020042420:53:48	Be palpitations
20042402116	Female	17	2020042421:57:01	Drug poisoning
20042601791	Male	17	2020042623:41:49	Acute gastric mucosal disease
20042601791	Male	17	2020042623:41:49	Alcohol poisoning
19081001193	Female	17	2020042710:27:34	Hypokalemia
19081001193	Female	17	2020042710:27:34	Acute gastric mucosal disease
19081001193	Female	17	2020042710:27:34	Nausea and vomiting
20042702165	Male	17	2020042719:10:54	Respiratory infections
20050201264	Female	17	2020050213:15:42	Myocarditis
20050201264	Female	17	2020050213:15:42	Chest pain
20050201871	Male	17	2020050220:57:34	Hypertension
20050201871	Male	17	2020050220:57:34	Dizziness
20050301217	Female	17	2020050314:54:08	Nausea and vomiting
20050301838	Male	17	2020050321:10:58	Bacterial infection
20050301838	Male	17	2020050321:10:58	Gout
20050301838	Male	17	2020050321:10:58	Foot pain
20050400872	Female	17	2020050410:16:20	Ezolam drug poisoning
17100200093	Female	17	2020050508:26:12	See it again
17100200093	Female	17	2020050508:26:12	Hyperthyroidism
20050601197	Male	17	2020050611:23:46	Toes
20050602089	Female	17	2020050616:32:21	Bacterial infection
20050602089	Female	17	2020050616:32:21	Vomiting
20050701587	Male	17	2020050722:57:41	Pleural effusion
20050701587	Male	17	2020050722:57:41	Abdominal pain
20050701587	Male	17	2020050722:57:41	Liver damage
20050701587	Male	17	2020050722:57:41	Chest pain
20050701587	Male	17	2020050722:57:41	Bacterial infection
20050701587	Male	17	2020050722:57:41	Leukemia?
20050701587	Male	17	2020050722:57:41	Mediastinum tumors
20050701587	Male	17	2020050722:57:41	Gastritis
20050901186	Female	17	2020050912:04:14	Abdominal pain
20050901186	Female	17	2020050912:04:14	Bacterial infection
18021600759	Female	17	2020050914:00:37	Health check
20051001826	Female	17	2020051020:30:33	Gastritis
20051001826	Female	17	2020051020:30:33	Intestinal infection
20051001826	Female	17	2020051020:30:33	Abdominal pain
20051201736	Female	17	2020051213:53:57	Abdominal pain
20051201736	Female	17	2020051213:53:57	Bacterial infection
20050702103	Female	17	2020051214:01:44	Anemia
20050702103	Female	17	2020051214:01:44	Thrombocytopenia
20050702103	Female	17	2020051214:01:44	Subcutaneous emphysema
20050701587	Male	17	2020051405:46:22	Lymphoma?
20050701587	Male	17	2020051405:46:22	Bacterial infection
20050701587	Male	17	2020051405:46:22	Pleural effusion
20050701587	Male	17	2020051405:46:22	Mediastinum tumors
20050701587	Male	17	2020051405:46:22	Gastritis
20050701587	Male	17	2020051405:46:22	Liver damage
20051600007	Male	17	2020051600:24:13	Alcohol poisoning
19111601233	Male	17	2020052000:04:36	Chest pain
20052000542	Female	17	2020052011:08:21	Lackluster
20052000542	Female	17	2020052011:08:21	Dizziness
20052101240	Male	17	2020052111:59:20	Thrombocytopenia
20052101240	Male	17	2020052111:59:20	Severe pneumonia
20052101240	Male	17	2020052111:59:20	Hypoxemia
20052101240	Male	17	2020052111:59:20	Bacterial infection
20052101240	Male	17	2020052111:59:20	Viral infection
20052101240	Male	17	2020052111:59:20	Respiratory failure
20052101240	Male	17	2020052111:59:20	Respiratory infections
20052101240	Male	17	2020052111:59:20	Gastritis
20052101240	Male	17	2020052111:59:20	After congenital heart disease
20052101240	Male	17	2020052111:59:20	Heat
20052101240	Male	17	2020052112:33:38	Thrombocytopenia
20052101240	Male	17	2020052112:33:38	Respiratory failure
20052101240	Male	17	2020052112:33:38	Gastritis
20052101240	Male	17	2020052112:33:38	After congenital heart disease
20052101240	Male	17	2020052112:33:38	Severe pneumonia
20052101240	Male	17	2020052112:33:38	Heat
20052101713	Male	17	2020052115:32:40	Be considered
19111601233	Male	17	2020052116:26:55	Bacterial infection
19111601233	Male	17	2020052116:26:55	Chest pain
20051901479	Female	17	2020052213:41:00	Heat
19112202105	Male	17	2020052220:56:39	Foreign object in esophagus
18121400145	Male	17	2020052507:04:24	Lymph node enlargement
18121400145	Male	17	2020052507:04:24	Infectious fever
17092302518	Female	17	2020052509:43:20	Viral infection
17092302518	Female	17	2020052509:43:20	White cell reduction
17092302518	Female	17	2020052509:43:20	Enlarged cervical lymph nodes
18020801061	Female	17	2020052510:48:27	Asthma
18020801061	Female	17	2020052510:50:29	Asthma
20042900378	Male	17	2020052520:01:15	Chest pain
20051800085	Male	17	2020052607:55:32	Chest pain
20052700043	Male	17	2020052706:10:27	Gastritis
20052700043	Male	17	2020052706:10:27	Abdominal pain
20052702069	Male	17	2020052717:45:38	Acute gastritis
20052702069	Male	17	2020052717:45:38	Digestive bleeding?
19030401751	Female	17	2020052815:59:30	Appetite is lacking
19030401751	Female	17	2020052815:59:30	Disgusting
19082300428	Male	17	2020052907:14:45	Bloating
19032101535	Female	17	2020052908:00:15	Viral infection?
19032101535	Female	17	2020052908:00:15	Anemia
19032101535	Female	17	2020052908:00:15	Lackluster
20052901925	Female	17	2020052918:30:44	Extremities are numb
20060102120	Female	17	2020060117:31:12	Infectious monocytosis, others
20060102120	Female	17	2020060117:31:12	Vomiting
20060102120	Female	17	2020060117:31:12	Abdominal pain
20060102320	Female	17	2020060119:20:56	Chest stuffy
19032101535	Female	17	2020060208:00:49	Viral infection?
20060302094	Female	17	2020060317:08:39	Mediastinal emphysema
20060302094	Female	17	2020060317:08:39	Chest pain
20060402137	Female	17	2020060607:37:21	Lackluster
20060402137	Female	17	2020060607:37:21	Dizziness
20060501046	Female	17	2020060607:51:52	Lackluster
20060900027	Male	17	2020060904:46:21	Abdominal pain
20060900027	Male	17	2020060904:46:21	Heat
20060900027	Male	17	2020060904:46:21	Bacterial infection
20060900027	Male	17	2020060904:46:21	Chest stuffy
[truncated: 253,695+ more rows]
